# Supplementary material for: Effect of the comprehensive smoke-free law on time trends in smoking behaviour in primary healthcare patients in Spain: a longitudinal observational study
Source: PubMed Central journal article supplement — BMJ Open. 2019 Mar 3;9(3):e020120. doi: 10.1136/bmjopen-2017-020120 (PMC6443085; doi:10.1136/bmjopen-2017-020120), 2019-03-03
Supplement: bmjopen-2017-020120.draft_revisions.pdf [file bmjopen-2017-020120.draft_revisions.pdf]

# BMJ Open

BMJ Open is committed to open peer review. As part of this commitment we make the peer review history of every article we publish publicly available.

When an article is published we post the peer reviewers' comments and the authors' responses online. We also post the versions of the paper that were used during peer review. These are the versions that the peer review comments apply to.

The versions of the paper that follow are the versions that were submitted during the peer review process. They are not the versions of record or the final published versions. They should not be cited or distributed as the published version of this manuscript.

BMJ Open is an open access journal and the full, final, typeset and author-corrected version of record of the manuscript is available on our site with no access controls, subscription charges or pay-per-view fees (<http://bmjopen.bmj.com>).

If you have any questions on BMJ Open's open peer review process please email [editorial.bmjopen@bmj.com](mailto:editorial.bmjopen@bmj.com)

# BMJ Open

## Effect of the Spanish comprehensive smoke-free law on time trends in smoking behaviour in Primary Health Care patients

|                                 |                                                                                                                                                                                                                                                                                                                                                                                                                                                                                                                                                                                                                                                                                                                                                                                                                                                                                                                                                                    |
|---------------------------------|--------------------------------------------------------------------------------------------------------------------------------------------------------------------------------------------------------------------------------------------------------------------------------------------------------------------------------------------------------------------------------------------------------------------------------------------------------------------------------------------------------------------------------------------------------------------------------------------------------------------------------------------------------------------------------------------------------------------------------------------------------------------------------------------------------------------------------------------------------------------------------------------------------------------------------------------------------------------|
| Journal:                        | <i>BMJ Open</i>                                                                                                                                                                                                                                                                                                                                                                                                                                                                                                                                                                                                                                                                                                                                                                                                                                                                                                                                                    |
| Manuscript ID                   | bmjopen-2017-020120                                                                                                                                                                                                                                                                                                                                                                                                                                                                                                                                                                                                                                                                                                                                                                                                                                                                                                                                                |
| Article Type:                   | Research                                                                                                                                                                                                                                                                                                                                                                                                                                                                                                                                                                                                                                                                                                                                                                                                                                                                                                                                                           |
| Date Submitted by the Author:   | 16-Oct-2017                                                                                                                                                                                                                                                                                                                                                                                                                                                                                                                                                                                                                                                                                                                                                                                                                                                                                                                                                        |
| Complete List of Authors:       | Pons-Vigués, Mariona; Institut Universitari d'Investigació en Atenció Primària Jordi Gol (IDIAP Jordi Gol), Rando-Matos , Yolanda; Centre d'Atenció Primària (CAP) Florida Nord. Institut Català de la Salut (ICS); Institut Universitari d'Investigació en Atenció Primària Jordi Gol (IDIAP Jordi Gol) Rodriguez-Blanco, Teresa; IDIAP Jordi Gol FoundationIDIAP Jordi Gol Foundation, Department of Epidemiology and Biostatistics Ballvé-Moreno , Josep Lluís ; Centre d'Atenció Primària (CAP) Florida Nord. Institut Català de la Salut (ICS) ; Institut Universitari d'Investigació en Atenció Primària Jordi Gol (IDIAP Jordi Gol) Ripoll, Joana; Balears Health services-IbSalut, 1. Primary Care Research Unit of Mallorca Llobera, Joan; Balears Health services-IbSalut, 1. Primary Care Research Unit of Mallorca Morán, Julio; Equipo de Atención Primaria de Tafalla. Servicio Navarro de Salud Violan-Fors, Concepción Bolibar-Ribas, Buenaventura |
| <b>Primary Subject Heading</b>: | Smoking and tobacco                                                                                                                                                                                                                                                                                                                                                                                                                                                                                                                                                                                                                                                                                                                                                                                                                                                                                                                                                |
| Secondary Subject Heading:      | Epidemiology, General practice / Family practice, Health policy                                                                                                                                                                                                                                                                                                                                                                                                                                                                                                                                                                                                                                                                                                                                                                                                                                                                                                    |
| Keywords:                       | Electronic health records, Joinpoint analysis, Primary Health Care, Smoke-Free Policy, Smoking                                                                                                                                                                                                                                                                                                                                                                                                                                                                                                                                                                                                                                                                                                                                                                                                                                                                     |
|                                 |                                                                                                                                                                                                                                                                                                                                                                                                                                                                                                                                                                                                                                                                                                                                                                                                                                                                                                                                                                    |

SCHOLARONE™  
Manuscripts

1  
2  
3 **Effect of the Spanish comprehensive smoke-free law on time trends in smoking behaviour in Primary Health Care**  
4 **patients**  
5

6  
7 **Author names and affiliations**

8 Mariona Pons-Vigués <sup>a,b,c</sup>

9 <sup>a</sup> Institut Universitari d'Investigació en Atenció Primària Jordi Gol (IDIAP Jordi Gol), Barcelona, Spain

10 <sup>b</sup> Universitat Autònoma de Barcelona, Bellaterra (Cerdanyola del Vallès), Spain.

11 <sup>c</sup> Universitat de Girona, Girona, Spain

12 e-mail: [mponsv@idiapjgol.info](mailto:mponsv@idiapjgol.info)

13  
14 Yolanda Rando-Matos <sup>d,a</sup>

15 <sup>d</sup> Centre d'Atenció Primària (CAP) Florida Nord. Institut Català de la Salut (ICS), Hospitalet de Llobregat, Barcelona, Spain

16 <sup>a</sup> Institut Universitari d'Investigació en Atenció Primària Jordi Gol (IDIAP Jordi Gol), Barcelona, Spain

17 e-mail: [yrando@ambitcp.catsalut.net](mailto:yrando@ambitcp.catsalut.net)

18  
19 Teresa Rodriguez-Blanco <sup>a,b</sup>

20 <sup>a</sup> Institut Universitari d'Investigació en Atenció Primària Jordi Gol (IDIAP Jordi Gol), Barcelona, Spain

21 <sup>b</sup> Universitat Autònoma de Barcelona, Bellaterra (Cerdanyola del Vallès), Spain

22 e-mail: [trodiguez@idiapjgol.org](mailto:trodiguez@idiapjgol.org)

23  
24 Josep Lluís Ballvé-Moreno <sup>d,a</sup>

25 <sup>d</sup> Centre d'Atenció Primària (CAP) Florida Nord. Institut Català de la Salut (ICS), Hospitalet de Llobregat, Barcelona, Spain

26 <sup>a</sup> Institut Universitari d'Investigació en Atenció Primària Jordi Gol (IDIAP Jordi Gol), Barcelona, Spain

27 e-mail: [jballve@ambitcp.catsalut.net](mailto:jballve@ambitcp.catsalut.net)

28  
29 Joana Ripoll <sup>e,f</sup>

30 <sup>e</sup> Primary Care Research Unit of Mallorca, Balears Health Services-Ibsalut, Palma, Spain

31 <sup>f</sup> Balearic Islands Health Research Institute (IdISBa), Palma, Spain

32 e-mail: [jripoll@ibsalut.caib.es](mailto:jripoll@ibsalut.caib.es)

33  
34 Joan Llobera <sup>e,f</sup>

35 <sup>e</sup> Primary Care Research Unit of Mallorca, Balears Health Services-Ibsalut, Palma, Spain

36 <sup>f</sup> Balearic Islands Health Research Institute (IdISBa), Palma, Spain

37 e-mail: [jllobera@ibsalut.caib.es](mailto:jllobera@ibsalut.caib.es)

38  
39 Julio Morán <sup>g</sup>

40 <sup>g</sup> Equipo de Atención Primaria de Tafalla. Servicio Navarro de Salud. Barasoain, Navarra, Spain.

41 e-mail: [jmoranpi@navarra.es](mailto:jmoranpi@navarra.es)

42  
43 Concepció Violán-Fors <sup>a,b</sup>

44 <sup>a</sup> Institut Universitari d'Investigació en Atenció Primària Jordi Gol (IDIAP Jordi Gol), Barcelona, Spain

45 <sup>b</sup> Universitat Autònoma de Barcelona, Bellaterra (Cerdanyola del Vallès), Spain

46 e-mail: [cviolan@idiapjgol.org](mailto:cviolan@idiapjgol.org)

47  
48 Bonaventura Bolibar <sup>a,b</sup>

49 <sup>a</sup> Institut Universitari d'Investigació en Atenció Primària Jordi Gol (IDIAP Jordi Gol), Barcelona, Spain

50 <sup>b</sup> Universitat Autònoma de Barcelona, Bellaterra (Cerdanyola del Vallès), Spain

51 e-mail: [bbolibar@idiapjgol.org](mailto:bbolibar@idiapjgol.org)

52 **Corresponding author:** Mariona Pons-Vigués

53 e-mail: [mponsv@idiapjgol.info](mailto:mponsv@idiapjgol.info)

54 Institut Universitari d'Investigació en Atenció Primària Jordi Gol (IDIAP Jordi Gol), Barcelona, Spain

55 Av. Gran Via de les Corts Catalanes 587, àtic

56 08007 - Barcelona

1  
2  
3 Tel: 0034 93 482 42 53  
4 www.idiapjgol.org  
5 <http://orcid.org/0000-0002-7929-3701>  
6

7 **Word count:** 3771 words  
8  
9  
10  
11  
12  
13  
14  
15  
16  
17  
18  
19  
20  
21  
22  
23  
24  
25  
26  
27  
28  
29  
30  
31  
32  
33  
34  
35  
36  
37  
38  
39  
40  
41  
42  
43  
44  
45  
46  
47  
48  
49  
50  
51  
52  
53  
54  
55  
56  
57  
58  
59  
60

For peer review only

1  
2  
3 **Effect of the Spanish comprehensive smoke-free law on time trends in smoking behaviour in Primary Health Care**  
4 **patients**  
5

6  
7 **ABSTRACT**

8 **Objective:** This study aimed to analyse the impact of comprehensive smoke-free legislation on the prevalence and  
9 incidence of adult smoking in Primary Health Care patients from three Spanish regions, overall and stratified by sex.

10  
11 **Design:** Longitudinal observational study conducted between 2008 and 2013.

12  
13 **Setting:** 66 Primary Health Care teams in Catalonia, Navarre and the Balearic Islands (Spain).

14  
15 **Participants:** Population over 15 years of age assigned to Primary Health Care teams.

16  
17 **Primary and secondary outcomes measures:** Quarterly age-standardized prevalence of non-smoker, smoker and ex-  
18 smoker and incidence of new smoker, new ex-smoker and ex-smoker relapse rates were estimated with data retrieved  
19 from PHC electronic health records. Joinpoint analysis was used to analyse the trends of age-standardized prevalence  
20 and incidence rates. Trends were expressed as annual percentage change and average annual percent change.

21  
22 **Results:** The overall standardized smoker prevalence rate showed a significant downward trend (higher in men than  
23 women) and the overall standardized ex-smoker prevalence rate showed a significant increased trend (higher in women  
24 than men) in the three regions. Standardized smoker and ex-smoker prevalence rates were higher for men than women  
25 in all regions. With regard to overall trends of incidence rates, new smokers decreased significantly in Catalonia and  
26 Navarre and similarly in men and women, new ex-smokers decreased significantly and more in men in Catalonia and  
27 the Balearic Islands, and ex-smoker relapse increased in Catalonia, particularly in women, and decreased in Navarre.

28  
29  
30 **Conclusions:** Trends on smoking behaviour in Primary Health Care patients remain unchanged after the comprehensive  
31 smoke-free legislation.  
32

33  
34 **Keywords:** Electronic health records; Joinpoint analysis; Primary Health Care; Smoke-Free Policy; Smoking.  
35  
36  
37  
38  
39  
40  
41  
42  
43  
44  
45  
46  
47  
48  
49  
50  
51  
52  
53  
54  
55  
56  
57  
58  
59  
60

**Strengths and limitations of this study**

- To our knowledge, no studies have been published on the impact of the Spanish comprehensive smoke-free legislation in all adult Primary Health Care patients
- The use of Primary Health Care records with a large number of participants and centres as data source to study time trends for smoking avoids the memory bias associated with surveys
- The results of quarterly data by joinpoint analysis provides more precise information than an analysis before-after the implementation of the Law
- This study only considered age and sex since other variables were not available for the adjusted analysis.
- The study period started later (short follow-up) in Balearic Islands to ensure reliability of data

## Effect of the Spanish comprehensive smoke-free law on time trends in smoking behaviour in Primary Health Care patients

### INTRODUCTION

Smoking is the leading worldwide cause of preventable death.<sup>1</sup> According to the World Health Organization (WHO), it is estimated that at least 30 million people may die prematurely from tobacco-related diseases.<sup>2</sup> Legislative measures have been adopted to protect people's health in public areas and workplaces. These include increasing the price of cigarettes, banning advertising, sponsorship and smoking in workplaces and public spaces, displaying warnings on tobacco packets and implementing prevention programs.<sup>3</sup>

Some studies show a decrease in smoking prevalence since the introduction of smoke-free legislation (SFL).<sup>4-9</sup> A meta-analysis of 26 studies on the effect of the smoke-free workplace in various countries concluded in 2002 that smoke-free workplaces protect not only non-smokers from the dangers of passive smoking, but they also encourage smokers to reduce tobacco consumption. The authors concluded that SFL is associated with a 3% to 4% reduction in tobacco consumption.<sup>10</sup> In contrast, a Cochrane review published in 2016 which included 24 studies on smoking behaviour showed inconsistencies regarding the impact of smoking bans on smoking prevalence and tobacco consumption.<sup>11</sup>

In January 1, 2006, the Spanish government introduced a partial SFL (Law 28/2005),<sup>12</sup> which included regulations on the sale, supply, consumption and advertising of tobacco products. Smoking was banned in all indoor public and private workplaces with the exception of the hospitality sector, where partial restrictions were established depending on the size of the establishment, i.e., in bars or restaurants smaller than 100 m<sup>2</sup> the managers could decide whether to allow smoking in the premises (Law 28/2005). The mean concentration of nicotine subsequently decreased by 60% in public administration offices and by 97.4% in private workplaces, but in areas where smoking was permitted, including bars and nightclubs, no changes were found.<sup>13-15</sup> This prompted the enactment of a comprehensive SFL (Law 42/2010),<sup>16</sup> which came into force in January 2011. This comprehensive law expanded smoking restriction to all hospitality venues of any size and, as a result, smoking was forbidden in all enclosed public places, including bars, restaurants and nightclubs, and in some open-air public places such as playgrounds.

Some studies have analysed the impact of these two Spanish laws on smoking prevalence. However, most have been based on health surveys<sup>13,17-20</sup> and surveys of hospitality workers.<sup>21,22</sup> Moreover, some studies evaluate only the partial law,<sup>13,17,18</sup> whereas others analyse the compound impact of both laws.<sup>19,20,23</sup> The results of these studies are often conflicting; while some conclude that the partial SFL does not have any effect on the downward trend in the prevalence of smokers,<sup>13,19,23</sup> other studies show differences in the smoking quit-ratio trends before/after SFL<sup>18</sup> and minor increases in the prevalence of active smoking.<sup>20</sup>

Only one study conducted in primary health care (PHC) patients evaluates the impact of the Spanish partial SFL, including smoking prevalence in active smoker workers that attended PHC visits; one month after the implementation

1  
2  
3 of the law, a 9.5% decline of smokers was observed.<sup>24</sup> To our knowledge, no studies have been published on the impact  
4 of the Spanish comprehensive SFL in all adult PHC patients. In view of the pivotal role of PHC services in smoking habits,  
5 we consider that the information registered in PHC records is a good proxy to generate up-to-date evidence and to  
6 evaluate the impact of comprehensive SFL in the general population.  
7  
8  
9

10 The aim of this study was to examine the impact of the Spanish comprehensive SFL (Law 42/2010) on the prevalence  
11 and incidence of adult smoking in PHC patients in three regions (Catalonia, Navarre and Balearic Islands), during the  
12 2008-2013 period, overall and stratified by sex.  
13  
14  
15

## 16 17 **METHODS**

### 18 **Design, study participants and information source**

19  
20 Longitudinal observational study of the adult population assigned to 66 Primary Health Care teams (PHCT) in three  
21 Spanish regions: Catalonia, Navarre and the Balearic Islands (22 PHCT per region). Inclusion criteria of the PHCT were: 1)  
22 computerization of electronic health records (EHR) by January 1, 2005 in Catalonia and Navarre, and 2008 in the  
23 Balearic Islands; and 2) agreement to participate in the study by over 80% health-care professionals working in each  
24 PHCT. Random cluster sampling was stratified by region, with the PHCT as randomization unit.<sup>25</sup> In each PHCT, General  
25 Practitioners (GP) with a patient list between 400 and 3000 were selected. GP with shorter patient lists were accepted  
26 if it was their first year in the PHCT.  
27  
28  
29  
30

31 The study period included from the first quarter of 2008 to the fourth quarter of 2013 in Catalonia and Navarre; and  
32 from the second quarter of 2010 to the fourth quarter of 2013 in the Balearic Islands. The study started in 2008 to  
33 obtain data from the 2 years prior analysis, a requirement to adequately construct the variable ex-smoker. In the case  
34 of the Balearic Islands, the study started later to ensure reliability of data.  
35  
36  
37

38 Inclusion criteria for patients were: 1) Population allocated to the selected PHCT for the whole 2007-2013 period in  
39 Catalonia and Navarre; in the Balearic Islands, patients allocated to the selected PHCT in 2013 and evaluated  
40 retrospectively (no annual comprehensive register of patients was available). 2) Age  $\geq 16$  and  $\leq 100$  years in 2007 in  
41 Catalonia and Navarre, and 2010 in the Balearic Islands. 3) In order to have data in the EHR collected during the study  
42 period, a minimum of one visit to their PHCT during the 2007-2013 period in Catalonia and Navarre and 2010-2013 in  
43 the Balearic Islands; and 4) Information on smoking habit recorded in the EHR for the quarter prior to the onset of the  
44 study: last quarter of 2007 in Catalonia and Navarre and first quarter of 2010 in the Balearic Islands, to enable the  
45 adequate construction of the various variables. Thus, closed cohorts (with fixed membership, where nobody is added  
46 nor excluded after the study begins) were constituted in the three regions. Figure 1 shows the flowchart of the study.  
47  
48  
49  
50  
51

52 Data were retrieved from the REGIPREV database,<sup>25</sup> which contains encrypted and anonymized clinical information  
53 recorded in the EHR by these 66 PHCT. An algorithm was applied to extract equivalent data from the health records  
54 software used in each region: "ECAP" in Catalonia, "Atenea" in Navarre and "e-siap" in the Balearic Islands. Codes of  
55  
56  
57  
58  
59



1  
2  
3 the International Classification of Diseases, 9th revision in the Balearic Islands (ICD-9) and 10th in Catalonia (ICD 10<sup>th</sup>  
4 revision)<sup>26</sup> and the International Classification of Primary Care, Second edition, in Navarre (ICPC-2)<sup>27</sup> were used.  
5  
6

### 7 **Variables**

8 The dependent variables originate from clinical variables (number of cigarettes per day, history of smoking, history of  
9 advice for smoking cessation) and from diagnostic codes to classify diseases (codes F17.0 to F17.9 and Z72.0 of the ICD-  
10 10, 305.1 of the ICD-9 and P17 of the ICPC-2) recorded in the EHR. We calculated the following variables at the end of  
11 each quarter of the study period:  
12  
13

- 14 - Smoking status (three categories): 1) non-smoker: patient that has never been a tobacco consumer, 2) smoker:  
15 tobacco consumer or patient that has quit smoking for less than 12 months; and 3) ex-smoker: patient who used to  
16 smoke but has quit smoking for at least 12 continuous months. If the EHR did not register smoking status at some  
17 point in time, the last observation was carried forward.
- 18 - New smoker: patient non-smoker for the 12 months prior to the considered quarter that has started smoking  
19 during said quarter.
- 20 - New ex-smoker: patient was a smoker two years before the considered quarter and has continuously abstained  
21 from tobacco for at least 12 months.
- 22 - Ex-smoker relapse: patient ex-smoker during the 12 months prior to the considered quarter that has started  
23 smoking again during said quarter.

24 For higher accuracy in prevalence and incidence changes, quarterly estimates were calculated.  
25  
26  
27

28  
29  
30  
31 The following variables of each patient were collected at baseline (2008 in Catalonia and Navarre; 2010 in the Balearic  
32 Islands): age, sex (male/female), annual number of health problems and annual number of PHC visits. The number of  
33 health problems was used as a morbidity indicator; it was calculated as the sum of the number of different active  
34 health problems (chronic and acute, coded by ICPC-2).  
35  
36  
37

### 38 **Data analyses**

39 Descriptive statistics were used to summarize overall information. Categorical variables were expressed as percentage,  
40 and continuous variables as mean (standard deviation) or median (interquartile range [IQR]).  
41  
42  
43

44 Because they used different EHR systems (different standards and computer programs), different complementary  
45 measures to the SFL and also due to the shorter study period in the Balearic Islands, we performed a stratified analysis  
46 per region, overall and by sex. Age-standardized prevalence (non-smokers, smokers and ex-smokers) and incidence  
47 (new smokers, new ex-smokers and ex-smoker relapse) rates were calculated for each quarter using the direct method,  
48 and based on the European Standard Population (rates per 10,000 inhabitants).  
49  
50  
51

52 Joinpoint analysis was used to analyse the trends of age-standardized prevalence (smokers and ex-smokers) and  
53 incidence rates (new smokers, new ex-smokers and ex-smoker relapse) and to identify the best-fitting points (the  
54 'joinpoints', in calendar quarters) where the rate changes significantly overtime. Significant changes include changes in  
55  
56  
57  
58  
59  
60

direction or in the rate of increase or decrease<sup>28</sup>. Temporal trends were expressed as the annual percentage change (APC), computed over each specified time interval, and the average annual percent change (AAPC), computed to summarize and compare these trends over the entire time period. Ninety-five percent confidence intervals (95% CI) of APC and AAPC were calculated.

Analyses were performed using Stata/SE version 14.2 for Windows (Stata Corp. LP, College Station, Texas, US). The joinpoint regression analysis was carried out using the joinpoint software from the Surveillance Research Program of the US National Cancer Institute [ref. Joinpoint Regression Program, Version 4.3.1. April, 2016; Statistical Research and Applications Branch, National Cancer Institute] (National Cancer Institute. Statistical Research and Applications Branch) [On-line: <https://surveillance.cancer.gov/branches/srab/>].

## RESULTS

The study population was 392,966 patients: 141,071 in Catalonia, 73,644 in Navarre and 178,251 in the Balearic Islands. At the onset of the study, the mean age was 50.4 years in Catalonia, 54.0 in Navarre and 47.7 in the Balearic Islands. In the three cohorts more than half were women (>51 %). Catalonia presented the highest median number of visits (9, IQR: 3 -16) and the Balearic Islands presented the highest number of recorded active health problems per patient (median 10, IQR: 6-16) (Table 1).

**Table 1: Characteristics of the cohort study population by region at the onset of the study (2008 in Catalonia and Navarre, 2010 in the Balearic Islands).**

|                                                          | Catalonia<br>N =141,071             | Navarre<br>N = 73,644             | Balearic Islands<br>N =178,251      |
|----------------------------------------------------------|-------------------------------------|-----------------------------------|-------------------------------------|
| Age (years), SD                                          | 50.37 (17.23)                       | 54.04 (18.26)                     | 47.65 (17.56)                       |
| Sex (female),<br>number (%)                              | 72340 (51.28)                       | 37898 (51.46)                     | 94164 (52.83)                       |
| Number of visits,<br>mean (SD); median<br>(IQR)          | 11.69 (12.19);<br>9.00 (3.00-16.00) | 8.93 (9.30);<br>7.00 (3.00-12.00) | 11.01 (13.25);<br>7.00 (3.00-15.00) |
| Number of health<br>problems, mean<br>(SD); median (IQR) | 6.23 (4.58);<br>5.00 (3.00-8.00)    | 9.95 (5.39);<br>9.00 (6.00-13.00) | 11.85 (7.74);<br>10.00 (6.00-16.00) |

Abbreviations: SD, standard deviation; IQR, interquartile range.

Patients belonged to 22 Primary Health Care Teams in each region.

The **overall standardized smoker prevalence rates** were of similar magnitude in the three regions (ranges of 3579.2 - 4138.9 in Catalonia; 3719.8 - 4034.2 in Navarre; and 3787.4 - 4029.7 in the Balearic Islands). The prevalence rate decreased in Navarre during the whole study period, decreased in the Balearic Islands in most quarters, and also in Catalonia except for the last year. These rates were higher for men than for women in all regions (Supplementary File Tables S1-S6). A significant downward **overall trend of smoker prevalence rates** was found in Catalonia (AAPC= -0.020), Navarre (AAPC= -0.014) and the Balearic Islands (AAPC= -0.018); this downward trend was higher for men than for

1  
2  
3 women in the three regions. In Catalonia, the most significant reduction occurred during the period 2010.3-2011.2  
4 (APC= -0,092), similarly to the Balearic Islands (2010.2-2012.4; APC= -0.021), whereas in Navarre it occurred between  
5 2008.1-2011.3 (APC= -0.017) (Tables 2, 3, 4).  
6  
7

8 For the whole period, the **overall standardized ex-smoker prevalence rates** increased in Navarre, in the Balearic Islands  
9 and in Catalonia except for the last year. The rates in Catalonia were higher (ranges of: 1168.5 - 1781.2 in Catalonia;  
10 313.3 - 764.1 in Navarre; and 559.3 - 914.1 in the Balearic Islands). The standardized ex-smoker prevalence rates were  
11 higher for men than for women in all regions (Supplementary File Tables S1-S6). The **overall trend of ex-smoker**  
12 **prevalence rates** increased significantly in the three regions throughout the study period but was higher in Navarre  
13 (Navarre AAPC= 0.154; Catalonia AAPC= 0.069; Balearic Islands AAPC= 0.139). The increase in the prevalence rate of ex-  
14 smokers was higher for the-2008.1-2008.3 period in Catalonia and Navarre, and for 2010.2-2012.2 in the Balearic  
15 Islands, and higher in women in the three regions (women: Catalonia AAPC= 0.103; Navarre AAPC=0.160 and Balearic  
16 Islands AAPC= 0.176) (Tables 2, 3, 4).  
17  
18  
19  
20  
21  
22

23 The **overall new smoker standardized incidence rates** showed low values in the three regions (ranges of 7.9 - 26.8 in  
24 Catalonia; 9.5 - 30.9 in Navarre; 1.6 - 17.5 in the Balearic Islands) and higher for men than for women in Catalonia and  
25 Navarre (Supplementary File Tables S1-S6). The **overall trend of new smoker incidence rates** decreased significantly in  
26 Catalonia (AAPC= -0.113) and Navarre (AAPC= -0.099); additionally, the decline was similar for men and women. In  
27 contrast, the trend remained stable in the Balearic Islands (Tables 2, 3, 4).  
28  
29  
30

31 The **overall standardized new ex-smoker incidence rates** showed higher values in Catalonia (range: 110.7 - 317.6) than  
32 in Navarre (range: 48.6 - 181.0) and the Balearic Islands (range: 93.7 - 188.1) (Supplementary File Tables S1-S6). The  
33 **overall trend of new ex-smoker incidence rates** showed a significant decrease in Catalonia (AAPC= -0.076) and  
34 especially in the Balearic Islands (AAPC= -0.125). This downward trend was higher for men than for women in Catalonia  
35 and the Balearic Islands (Tables 2, 3, 4).  
36  
37  
38  
39

40 The **overall standardized ex-smoker relapse incidence rates** presented higher values in the Balearic Islands (range:  
41 103.9 - 576.6) than in Catalonia (range: 70.7 - 334.5) and Navarre (range: 58.6 - 230.3) (Supplementary File Tables S1-  
42 S6). The **overall trend of ex-smoker relapse incidence rates** showed significant increases in Catalonia (AAPC= 0.173),  
43 particularly in women (AAPC= 0.140). In contrast, Navarre showed significant decreases (AAPC= -0.121) (Tables 2, 3, 4).  
44  
45  
46  
47  
48  
49  
50  
51  
52  
53  
54  
55  
56  
57  
58  
59  
60

1  
2  
3  
4  
5  
6  
7  
8  
9  
10  
11  
12  
13  
14  
15  
16  
17  
18  
19  
20  
21  
22  
23  
24  
25  
26  
27  
28  
29  
30  
31  
32  
33  
34  
35  
36  
37  
38  
39  
40  
41  
42  
43  
44  
45  
46  
47

**Table 2. Trends in prevalence of smoking status and incidence of new smokers, ex-smokers and ex-smoker relapse. Joinpoints overall and by sex in CATALONIA. N=141,071 (2008-2013)**

| Trend 1                            |                                             | Trend 2         |                                       | Trend 3         |                                       | Trend 4         |                                     | Trend 5         |                                   | AAPC (95% IC)<br>2008.1 - 2013.4      |
|------------------------------------|---------------------------------------------|-----------------|---------------------------------------|-----------------|---------------------------------------|-----------------|-------------------------------------|-----------------|-----------------------------------|---------------------------------------|
| Time                               | APC (95% IC)                                | Time            | APC (95% IC)                          | Time            | APC(95% IC)                           | Time            | APC (95% IC)                        | Time            | APC (95% IC)                      |                                       |
| <b>Smoker prevalence</b>           |                                             |                 |                                       |                 |                                       |                 |                                     |                 |                                   |                                       |
| 2008.1 - 2010.3                    | -0.005 <sup>d</sup> (-0.010 ; 0.001)        | 2010.3 - 2011.2 | -0.108 <sup>b</sup> (-0.180 ; -0.036) | 2011.2 - 2013.4 | -0.006 <sup>c</sup> (-0.011 ; -0.001) |                 |                                     |                 |                                   | -0.019 <sup>a</sup> (-0.028 ; -0.010) |
| 2008.1 - 2010.3                    | -0.020 <sup>a</sup> (-0.022 ; -0.017)       | 2010.3 - 2011.2 | -0.086 <sup>a</sup> (-0.120 ; -0.052) | 2011.2 - 2012.4 | -0.031 <sup>a</sup> (-0.038 ; -0.024) | 2012.4 - 2013.4 | 0.027 <sup>a</sup> (0.016 ; 0.037)  |                 |                                   | -0.023 <sup>a</sup> (-0.028 ; -0.018) |
| <b>2008.1 - 2010.3</b>             | <b>-0.013<sup>a</sup> (-0.016 ; -0.010)</b> | 2010.3 - 2011.2 | -0.092 <sup>a</sup> (-0.133 ; -0.051) | 2011.2 - 2011.4 | -0.023 <sup>a</sup> (-0.032 ; -0.015) | 2012.4 - 2013.4 | 0.020 <sup>b</sup> (0.007 ; 0.033)  |                 |                                   | -0.020 <sup>a</sup> (-0.026 ; -0.015) |
| <b>Ex-smoker prevalence</b>        |                                             |                 |                                       |                 |                                       |                 |                                     |                 |                                   |                                       |
| 2008.1 - 2008.4                    | 0.160 <sup>a</sup> (0.131 ; 0.188)          | 2008.4 - 2011.2 | 0.106 <sup>a</sup> (0.102 ; 0.111)    | 2011.2 - 2012.1 | 0.147 <sup>a</sup> (0.100 ; 0.193)    | 2012.1 - 2013.1 | 0.092 <sup>a</sup> (0.069 ; 0.114)  | 2013.1 - 2013.4 | 0.005 <sup>d</sup> (-0.017;0.027) | 0.103 <sup>a</sup> (0.095 ; 0.111)    |
| 2008.1 - 2008.3                    | 0.138 <sup>b</sup> (0.041 ; 0.235)          | 2008.3 - 2011.1 | 0.053 <sup>a</sup> (0.045 ; 0.061)    | 2011.1 - 2012.4 | 0.073 <sup>a</sup> (0.060 ; 0.086)    | 2012.4 - 2013.4 | -0.050 <sup>a</sup> (-0.074;-0.026) |                 |                                   | 0.049 <sup>a</sup> (0.039 ; 0.058)    |
| 2008.1 - 2008.3                    | 0.154 <sup>a</sup> (0.081 ; 0.228)          | 2008.3 - 2011.1 | 0.074 <sup>a</sup> (0.067 ; 0.080)    | 2011.1 - 2012.4 | 0.092 <sup>a</sup> (0.082 ; 0.103)    | 2012.4 - 2013.4 | -0.024 <sup>c</sup> (-0.042;-0.005) |                 |                                   | 0.069 <sup>a</sup> (0.062 ; 0.077)    |
| <b>New smokers incidence</b>       |                                             |                 |                                       |                 |                                       |                 |                                     |                 |                                   |                                       |
| 2008.1 - 2013.4                    | -0.116 <sup>b</sup> (-0.188; -0.044)        |                 |                                       |                 |                                       |                 |                                     |                 |                                   | -0.116 <sup>b</sup> (-0.188 ; -0.044) |
| 2008.1 - 2013.4                    | -0.113 <sup>a</sup> (-0.173; -0.053)        |                 |                                       |                 |                                       |                 |                                     |                 |                                   | -0.113 <sup>a</sup> (-0.173 ; -0.053) |
| 2008.1 - 2013.4                    | -0.113 <sup>a</sup> (-0.168; -0.057)        |                 |                                       |                 |                                       |                 |                                     |                 |                                   | -0.113 <sup>a</sup> (-0.168 ; -0.057) |
| <b>New ex-smokers incidence</b>    |                                             |                 |                                       |                 |                                       |                 |                                     |                 |                                   |                                       |
| 2008.1 - 2013.4                    | -0.053 <sup>d</sup> (-0.109 ; 0.003)        |                 |                                       |                 |                                       |                 |                                     |                 |                                   | -0.053 <sup>d</sup> (-0.109 ; 0.003)  |
| 2008.1 - 2013.4                    | -0.082 <sup>b</sup> (-0.142; -0.022)        |                 |                                       |                 |                                       |                 |                                     |                 |                                   | -0.082 <sup>b</sup> (-0.142 ; -0.022) |
| 2008.1 - 2013.4                    | -0.076 <sup>b</sup> (-0.133; -0.020)        |                 |                                       |                 |                                       |                 |                                     |                 |                                   | -0.076 <sup>b</sup> (-0.133 ; -0.020) |
| <b>Ex-smoker relapse incidence</b> |                                             |                 |                                       |                 |                                       |                 |                                     |                 |                                   |                                       |
| 2008.1 - 2012.3                    | -0.090 <sup>d</sup> (-0.205 ; 0.025)        | 2012.3 - 2013.4 | 0.972 <sup>a</sup> (0.524 ; 1.422)    |                 |                                       |                 |                                     |                 |                                   | 0.140 <sup>c</sup> (0.016 ; 0.264)    |
| 2008.1 - 2009.3                    | -0.649 <sup>d</sup> (-1.552 ; 0.262)        | 2009.3 - 2010.2 | 0.787 <sup>d</sup> (-5.329 ; 7.298)   | 2010.2 - 2012.2 | -0.318 <sup>c</sup> (-0.599; -0.037)  | 2012.3 - 2013.2 | 1.853 <sup>d</sup> (-0.505; 4.266)  | 2013.2 - 2013.4 | 0.561 <sup>d</sup> (-0.759;1.898) | 0.096 <sup>d</sup> (-0.709 ; 0.907)   |
| 2008.1 - 2012.3                    | -0.083 <sup>d</sup> (-0.175 ; 0.010)        | 2012.3 - 2013.4 | 1.100 <sup>a</sup> (0.803 ; 1.398)    |                 |                                       |                 |                                     |                 |                                   | 0.173 <sup>a</sup> (0.083 ; 0.264)    |

Note: 2008.\*. represents the quarter \* of the year 2008

APC, annual percentage change and AAPC, average annual percent change estimated by joinpoint regression analysis; CI, confidence interval; F, female; G, global; M, male.

<sup>a</sup>p<0.001; <sup>b</sup>p<0.01; <sup>c</sup>p<0.05; <sup>d</sup>p>0.05

**Table 3. Trends in prevalence of smoking status and incidence of new smokers, ex-smokers and ex-smoker relapse. Joinpoints overall and by sex in NAVARRE. N=73,644 (2008-2013)**

|                                    | Trend 1         |                                       | Trend 2         |                                       | Trend 3         |                                      | Trend 4         |                                    | Trend 5         |                                    | AAPC (95% IC)<br>2008.1 - 2013.4      |
|------------------------------------|-----------------|---------------------------------------|-----------------|---------------------------------------|-----------------|--------------------------------------|-----------------|------------------------------------|-----------------|------------------------------------|---------------------------------------|
|                                    | Time            | APC (95% IC)                          | Time            | APC (95% IC)                          | Time            | APC (95% IC)                         | Time            | APC (95% IC)                       | Time            | APC (95% IC)                       |                                       |
| <b>Smoker prevalence</b>           |                 |                                       |                 |                                       |                 |                                      |                 |                                    |                 |                                    |                                       |
| 9 F                                | 2008.1 - 2010.3 | -0.010 <sup>a</sup> (-0.012 ; -0.007) | 2010.3 - 2011.2 | -0.024 <sup>d</sup> (-0.059 ; 0.010)  | 2011.2 - 2013.4 | -0.002 <sup>d</sup> (-0.005 ; 0.001) |                 |                                    |                 |                                    | -0.008 <sup>a</sup> (-0.013 ; -0.004) |
| 10 M                               | 2008.1 - 2013.4 | -0.020 <sup>a</sup> (-0.021 ; -0.019) |                 |                                       |                 |                                      |                 |                                    |                 |                                    | -0.020 <sup>a</sup> (-0.021 ; -0.019) |
| 11 G                               | 2008.1 - 2011.3 | -0.017 <sup>a</sup> (-0.019 ; -0.015) | 2011.3 - 2013.4 | -0.010 <sup>a</sup> (-0.014 ; -0.005) |                 |                                      |                 |                                    |                 |                                    | -0.014 <sup>a</sup> (-0.016 ; -0.012) |
| <b>Ex-smoker prevalence</b>        |                 |                                       |                 |                                       |                 |                                      |                 |                                    |                 |                                    |                                       |
| 13 F                               | 2008.1 - 2008.3 | 0.347 <sup>a</sup> (0.248 ; 0.445)    | 2008.3 - 2010.2 | 0.177 <sup>a</sup> (0.163 ; 0.191)    | 2010.2 - 2011.3 | 0.123 <sup>a</sup> (0.100 ; 0.147)   | 2011.3 - 2012.2 | 0.184 <sup>a</sup> (0.114 ; 0.254) | 2012.2 - 2013.4 | 0.098 <sup>a</sup> (0.087 ; 0.109) | 0.160 <sup>a</sup> (0.148 ; 0.173)    |
| 14 M                               | 2008.1 - 2008.3 | 0.294 <sup>a</sup> (0.170 ; 0.419)    | 2008.3 - 2009.4 | 0.178 <sup>a</sup> (0.143 ; 0.213)    | 2009.4 - 2012.4 | 0.128 <sup>a</sup> (0.122 ; 0.134)   | 2012.4 - 2013.4 | 0.092 <sup>a</sup> (0.067 ; 0.117) |                 |                                    | 0.147 <sup>a</sup> (0.134 ; 0.160)    |
| 15 G                               | 2008.1 - 2008.3 | 0.312 <sup>a</sup> (0.181 ; 0.442)    | 2008.3 - 2009.4 | 0.183 <sup>a</sup> (0.146 ; 0.220)    | 2009.4 - 2012.4 | 0.137 <sup>a</sup> (0.130 ; 0.143)   | 2012.4 - 2013.4 | 0.092 <sup>a</sup> (0.065 ; 0.120) |                 |                                    | 0.154 <sup>a</sup> (0.141 ; 0.168)    |
| <b>New smokers incidence</b>       |                 |                                       |                 |                                       |                 |                                      |                 |                                    |                 |                                    |                                       |
| 17 F                               | 2008.1 - 2013.4 | -0.099 <sup>b</sup> (-0.171 ; -0.027) |                 |                                       |                 |                                      |                 |                                    |                 |                                    | -0.099 <sup>b</sup> (-0.171 ; -0.027) |
| 18 M                               | 2008.1 - 2013.4 | -0.098 <sup>b</sup> (-0.163 ; -0.034) |                 |                                       |                 |                                      |                 |                                    |                 |                                    | -0.098 <sup>b</sup> (-0.163 ; -0.034) |
| 19 G                               | 2008.1 - 2013.4 | -0.099 <sup>b</sup> (-0.161 ; -0.038) |                 |                                       |                 |                                      |                 |                                    |                 |                                    | -0.099 <sup>b</sup> (-0.161 ; -0.038) |
| <b>New ex-smokers incidence</b>    |                 |                                       |                 |                                       |                 |                                      |                 |                                    |                 |                                    |                                       |
| 21 F                               | 2008.1 - 2013.4 | -0.102 <sup>b</sup> (-0.161 ; -0.042) |                 |                                       |                 |                                      |                 |                                    |                 |                                    | -0.102 <sup>b</sup> (-0.161 ; -0.042) |
| 22 M                               | 2008.1 - 2013.4 | -0.027 <sup>d</sup> (-0.096 ; 0.041)  |                 |                                       |                 |                                      |                 |                                    |                 |                                    | -0.027 <sup>d</sup> (-0.096 ; 0.041)  |
| 23 G                               | 2008.1 - 2013.4 | -0.051 <sup>d</sup> (-0.114 ; 0.011)  |                 |                                       |                 |                                      |                 |                                    |                 |                                    | -0.051 <sup>d</sup> (-0.114 ; 0.011)  |
| <b>Ex-smoker relapse incidence</b> |                 |                                       |                 |                                       |                 |                                      |                 |                                    |                 |                                    |                                       |
| 25 F                               | 2008.1 - 2013.4 | -0.149 <sup>a</sup> (-0.220 ; -0.079) |                 |                                       |                 |                                      |                 |                                    |                 |                                    | -0.149 <sup>a</sup> (-0.220 ; -0.079) |
| 26 M                               | 2008.1 - 2013.4 | -0.128 <sup>c</sup> (-0.225 ; -0.031) |                 |                                       |                 |                                      |                 |                                    |                 |                                    | -0.128 <sup>d</sup> (-0.225 ; -0.031) |
| 27 G                               | 2008.1 - 2013.4 | -0.121 <sup>a</sup> (-0.189 ; -0.052) |                 |                                       |                 |                                      |                 |                                    |                 |                                    | -0.121 <sup>a</sup> (-0.189 ; -0.052) |

Note: 2008.\*. represents the quarter \* of the year 2008

APC, annual percentage change and AAPC, average annual percent change estimated by joinpoint regression analysis; CI, confidence interval; F, female; G, global; M, male.

<sup>a</sup> p ≤ 0.001; <sup>b</sup> p ≤ 0.01; <sup>c</sup> p ≤ 0.05; <sup>d</sup> p > 0.05

**Table 4. Trends in prevalence of smoking status and incidence of new smokers, ex-smokers and ex-smoker relapse. Joinpoints overall and by sex in THE BALEARIC ISLANDS. N=178,251 (2010-2013)**

|                                    | Trend 1         |                                      | Trend 2         |                                      | Trend 3         |                                      | AAPC (95% IC)<br>2010.2 - 2013.4 |                                      |
|------------------------------------|-----------------|--------------------------------------|-----------------|--------------------------------------|-----------------|--------------------------------------|----------------------------------|--------------------------------------|
|                                    | Time            | APC (95% IC)                         | Time            | APC (95% IC)                         | Time            | APC (95% IC)                         |                                  |                                      |
| <b>Smoker prevalence</b>           |                 |                                      |                 |                                      |                 |                                      |                                  |                                      |
| F                                  | 2010.2 - 2013.4 | -0.012 <sup>a</sup> (-0.014; -0.010) |                 |                                      |                 |                                      |                                  | -0.012 <sup>a</sup> (-0.014; -0.010) |
| M                                  | 2010.2 - 2011.1 | -0.021 <sup>a</sup> (-0.026; -0.016) | 2011.1 - 2012.3 | -0.031 <sup>a</sup> (-0.033; -0.029) | 2012.3 - 2013.4 | -0.015 <sup>a</sup> (-0.018; -0.012) |                                  | -0.023 <sup>a</sup> (-0.025; -0.022) |
| G                                  | 2010.2 - 2012.4 | -0.021 <sup>a</sup> (-0.023; -0.019) | 2012.4 - 2013.4 | -0.009 <sup>d</sup> (-0.019; 0.002)  |                 |                                      |                                  | -0.018 <sup>a</sup> (-0.021; -0.015) |
| <b>Ex-smoker prevalence</b>        |                 |                                      |                 |                                      |                 |                                      |                                  |                                      |
| F                                  | 2010.2 - 2012.2 | 0.222 <sup>a</sup> (0.216; 0.229)    | 2012.2 - 2013.4 | 0.114 <sup>a</sup> (0.105; 0.122)    |                 |                                      |                                  | 0.176 <sup>a</sup> (0.171; 0.180)    |
| M                                  | 2010.2 - 2012.2 | 0.147 <sup>a</sup> (0.136; 0.159)    | 2012.2 - 2013.4 | 0.070 <sup>a</sup> (0.055; 0.085)    |                 |                                      |                                  | 0.114 <sup>a</sup> (0.106; 0.122)    |
| G                                  | 2010.2 - 2012.2 | 0.177 <sup>a</sup> (0.172; 0.182)    | 2012.2 - 2013.4 | 0.089 <sup>a</sup> (0.082; 0.095)    |                 |                                      |                                  | 0.139 <sup>a</sup> (0.136; 0.143)    |
| <b>New smokers incidence</b>       |                 |                                      |                 |                                      |                 |                                      |                                  |                                      |
| F                                  | 2010.2 - 2012.4 | -0.584 <sup>b</sup> (-0.963; -0.203) | 2012.4 - 2013.4 | 2.627 <sup>c</sup> (0.686; 4.605)    |                 |                                      |                                  | 0.323 <sup>d</sup> (-0.214; 0.863)   |
| M                                  | 2010.2 - 2012.4 | -0.611 <sup>b</sup> (-0.907; -0.314) | 2012.4 - 2013.4 | 2.105 <sup>a</sup> (1.062; 3.158)    |                 |                                      |                                  | 0.157 <sup>d</sup> (-0.162; 0.477)   |
| G                                  | 2010.2 - 2012.4 | -0.613 <sup>b</sup> (-0.927; -0.298) | 2012.4 - 2013.4 | 2.460 <sup>b</sup> (1.130; 3.808)    |                 |                                      |                                  | 0.255 <sup>d</sup> (-0.129; 0.641)   |
| <b>New ex-smokers incidence</b>    |                 |                                      |                 |                                      |                 |                                      |                                  |                                      |
| F                                  | 2010.2 - 2013.4 | -0.119 <sup>c</sup> (-0.225; -0.012) |                 |                                      |                 |                                      |                                  | -0.119 <sup>c</sup> (-0.225; -0.012) |
| M                                  | 2010.2 - 2013.4 | -0.128 <sup>b</sup> (-0.205; -0.051) |                 |                                      |                 |                                      |                                  | -0.128 <sup>b</sup> (-0.205; -0.051) |
| G                                  | 2010.2 - 2013.4 | -0.125 <sup>b</sup> (-0.200; -0.049) |                 |                                      |                 |                                      |                                  | -0.125 <sup>b</sup> (-0.200; -0.049) |
| <b>Ex-smoker relapse incidence</b> |                 |                                      |                 |                                      |                 |                                      |                                  |                                      |
| F                                  | 2010.2 - 2013.1 | -0.388 <sup>a</sup> (-0.531; -0.245) |                 |                                      |                 |                                      |                                  | -0.388 <sup>a</sup> (-0.531; -0.245) |
| M                                  | 2010.2 - 2013.1 | -0.453 <sup>a</sup> (-0.595; -0.311) |                 |                                      |                 |                                      |                                  | -0.453 <sup>a</sup> (-0.595; -0.311) |
| G                                  | 2010.2 - 2013.1 | -0.203 <sup>c</sup> (-0.360; -0.046) | 2013.1 - 2013.4 | -1.903 <sup>d</sup> (-5.201; 1.510)  |                 |                                      |                                  | -0.570 <sup>d</sup> (-1.218; 0.082)  |

Note: 2010.\*. represents the quarter \* of the year 2010

APC, annual percentage change and AAPC, average annual percent change estimated by joinpoint regression analysis; CI, confidence interval; F, female; G, global; M, male.

<sup>a</sup> p≤ 0.001; <sup>b</sup> p≤ 0.01; <sup>c</sup> p≤ 0.05; <sup>d</sup> p>0.05

## DISCUSSION

The previous implementation of the partial Spanish SFL could account for the low effectiveness of the comprehensive SFL observed in this study. A small significant downward trend of smoker prevalence rates, higher in men than in women, was found in the three regions throughout the study period. Correspondingly, the trend of ex-smoker prevalence rates increased in the three regions, particularly in Navarre and during the period 2008.1-2008.3 in Catalonia and Navarre, and the period 2010.2-2012.2 in the Balearic Islands. Even though the standardized ex-smoker prevalence rate was higher for men, the increase in the trend of ex-smoker prevalence rate was higher in women in the three regions. The overall trends of new smoker incidence rates decreased significantly in Catalonia and Navarre and were similar for men and women. Also, the overall trends of new ex-smokers decreased significantly in Catalonia and the Balearic Islands, particularly for men. In addition, the overall trends of ex-smoker relapse increased in Catalonia and decreased in Navarre, more for women than for men in both cases. For all outcomes, the magnitude of the trends (overall and by sex) was very small (range 0.01% - 0.4%).

The trends of smoker prevalence declined throughout the study and no changes were observed after the implementation of the comprehensive SFL. Indeed, the most significant decrease begins in 2010 in Catalonia and the Balearic Islands and in 2008 in Navarre, prior to the implementation of the comprehensive SFL (January 1, 2011). Comparisons are difficult due to the lack of studies on smoking prevalence and incidence from a PHC perspective and because some studies evaluate the impact of SFL on smoking prevalence with surveys that use different methodologies. Two studies that analysed data from surveys to the general population<sup>19,20</sup> did not find a significant decrease in the prevalence of smokers after the Spanish comprehensive law. In contrast, Lidon *et al.*<sup>29</sup> observed that after the implementation of both Spanish SFL, a significant decrease was observed in the smoking prevalence (from 34.5% to 26.1%, Prevalence Ratio = 0.76,  $p < 0.001$ ) of people 16 years of age and older living in Barcelona surveyed in 2004–2005 and followed-up in 2013–2014. In addition, National Health Survey data from the 1987–2005 period revealed an annual average absolute decline of 1.0% in the prevalence of male smokers, whereas women showed an annual average absolute increase in prevalence of 0.2%. Between 2006 and 2014, the prevalence of smokers declined annually by 0.7% in men and 0.5% in women.<sup>23</sup> Although the values of the current study are lower the higher decline in the prevalence of smokers in men agree with these data.<sup>23</sup> Also, one study that estimated the effect of the Spanish SFL for the 2012–2025 period predicted a decrease in smoking prevalence in all age groups and for both sexes, except for women aged 40–64.<sup>30</sup>

Concomitantly with the decline in the prevalence trends in smokers, a constant increase of prevalence trends in ex-smokers was observed in the three regions. Other studies failed to note a significant change in the prevalence of ex-smokers after the comprehensive SFL: a difference of only 0.3 % between 2007 and 2011<sup>20</sup> and a non-significant increase of 3.3% between 2006 and 2011.<sup>19</sup> In agreement with a recent evidence review,<sup>23</sup> we observed a higher increase in the trend of ex-smokers prevalence in women. This review showed that the rate of smoking cessation in men increased 0.9% annually during the 1987–2014 period, and 1.5% in women after the Partial SFL came into force. The later incorporation of women to smoking might explain these gender differences.

1  
2  
3 We observed a gradual decline in the new smoker incidence trends in Catalonia and Navarre throughout the study  
4 period. A review by Wilson *et al.*<sup>31</sup> of two studies that evaluated smoking initiation reported mixed results, while  
5 Guerrero *et al.*(32) concluded that the Spanish partial SFL had no effect on new smokers in 2009 In contrast, Pinilla and  
6 Abásolo<sup>33</sup> observed a 6% decrease in the rate of smoking initiation among young people after the implementation of  
7 the same law, with a more positive impact in higher socioeconomic strata. We have not found studies that evaluate the  
8 impact of the comprehensive SFL on the incidence of new smokers. However, our data show a continuation in the trend  
9 observed in Pinilla's study<sup>33</sup> on the impact of the partial law, although the effect in two of the regions of our study is  
10 much smaller (<1%).

11  
12  
13  
14  
15  
16 The incidence trend in new ex-smokers declined gradually throughout the study period in Catalonia and the Balearic  
17 Islands. While the literature to date lacks data on the effect of the SFL on the incidence of new ex-smokers, it provides  
18 some information on prevalence. In this respect, one study on the Spanish partial SFL observed an increase of 8%  
19 between 2006 and 2011 in the rate of cessation among adult smokers (age 21 years and older) according to data from  
20 the National Health Survey.<sup>33</sup> In Luxembourg, smoking cessation attributed to the SFL was higher among daily smokers  
21 with a higher socioeconomic status.<sup>8</sup> In our cohort, we observed apparently random increases and declines in the  
22 adjusted rates in the three regions throughout the study.

23  
24  
25  
26  
27 The incidence trend in ex-smoker relapses increased in Catalonia and declined in Navarre constantly throughout the  
28 whole period, particularly for women. However, the literature presents conflicting results regarding smoking relapse.  
29 One study on the partial Spanish SFL observed that most people who had succeeded in giving up smoking in 2006 had  
30 not relapsed by 2009.<sup>32</sup> On the other hand, a quasi-experimental study conducted in the United States observed that  
31 relapse was similar between employees in workplaces with SFL and employees where smoking was permitted.<sup>34</sup> In  
32 contrast, Shang found that a comprehensive SFL in bars significantly deters smoking relapse among people ages 21 and  
33 older.<sup>35</sup> According to Buczkowski *et al.*,<sup>36</sup> the main reasons for relapse are stress, missing the pleasure obtained from  
34 smoking and the smoking environment. Other factors not analysed in our study that might influence relapse rates could  
35 explain the variations between regions, for instance living with other smokers, being enrolled in work or clinics  
36 cessation programmes<sup>37</sup> or the region-specific complementary measures to the SFL (for instance, Foral Law 6/2003,(38)  
37 February 14, of smoking prevention, protection from secondhand tobacco smoke and promotion of health with regard  
38 to smoking in Navarre). In addition, we should consider the impact of the financial crisis during the study period and the  
39 subsequent increase of anxiety and depression in the population.<sup>39</sup> In this respect, Navarre was the region with the  
40 lowest unemployment rate in Spain according to the 2010 Economically Active Population Survey (unemployment of  
41 11.6% in Navarre, versus 18.0% in Catalonia and 22.2% in the Balearic Islands). According to the 2009 European Health  
42 Survey in Spain, these unemployment figures correlate with the prevalence of chronic depression, which was of 3.4% in  
43 Navarre versus 5.4% in Catalonia and 7.0% in the Balearic Islands.

#### 52 53 **Limitations and strengths of the study**

54  
55 It is important to take into account that other than the Law, the pattern of tobacco consumption is influenced by  
56 factors such as health interventions, level of education, age, civil status, having children and being unemployed.<sup>40</sup>



1  
2  
3 However, this study only considered age and sex since other variables were not available. In addition, many patients  
4 were excluded from the study because data regarding smoking status at the onset were not recorded. Nevertheless, in  
5 order to avoid changes due to the improvement of the tobacco records during that period, we excluded those without  
6 information at the beginning of the study. Moreover, young people might be underrepresented due to their lower use  
7 of PHC services. On the other hand, 70% of the population attends PHC services at least once a year and smokers  
8 attend more frequently than no smokers.<sup>41</sup>  
9  
10

11  
12 This study provides useful data on the impact of the Spanish comprehensive SFL on adult smoking behaviour in PHC  
13 patients. It is crucial to analyse the consequences of a public health law on PHC users. Primary health care has a pivotal  
14 role in smoking cessation because it is the gatekeeper of the health services, it is accessible and provides continuity of  
15 care to smokers.<sup>42</sup> We should also highlight that this study includes the evaluation of novel variables such as incidence  
16 of new smokers, new ex-smokers and ex-smoker relapse. The use of PHC records with a large number of participants  
17 and centres as data source to study time trends for smoking avoids the memory bias associated with surveys. The  
18 results should therefore be generalizable. To our knowledge, this study is amongst the first to show quarterly data from  
19 EHR.  
20  
21  
22  
23

## 24 25 26 **CONCLUSIONS**

27 The introduction of the Spanish comprehensive SFL (Law 42/2010) does not significantly modify incidence and  
28 prevalence trends of smoking behaviour in PHC adult patients in Catalonia, Navarre and the Balearic Islands. The impact  
29 of the comprehensive SFL might have been lessened by the effect of the previous implementation of the partial SFL  
30 (Law 28/2005). The current article provides baseline data for future research into the effectiveness of this Law. In  
31 addition to specific factors associated with smoking behaviour (such as the price of a pack of cigarettes or funding of  
32 smoking cessation services), future studies should consider socio-economic status and age groups.  
33  
34  
35  
36  
37  
38

39 **Acknowledgements:** We thank all professionals of the 66 PHC teams who volunteered to participate in the study. The  
40 authors would also like to thank Josep M Elorza-Ricart, Magdalena Rosell-Murphy, Lluís Martínez, Javier Baquedano,  
41 Javier Arranz, M<sup>a</sup> Ángeles Nuin and Carlos Martín-Cantera for their collaboration. Also Eulàlia Farré for the English  
42 translation. This article forms part of the doctoral dissertation of Yolanda Rando-Matos at the Universitat Autònoma de  
43 Barcelona.  
44  
45  
46

47 **Contributors:** BB, TRB, MPV, JBM, and CVF designed the study and wrote the protocol. YRM, MPV and JBM conducted  
48 literature searches and provided summaries of previous research studies. BB, JLL, JM, JR and MPV obtained the data.  
49 TRB conducted the statistical analysis. All authors contributed to the interpretation of the results. YRM and MPV wrote  
50 the first draft of the manuscript. All authors read, contributed and approved the final version of the manuscript.  
51  
52  
53

54 **Funding:** This project has been funded by the Carlos III Health Institute (Ministry of Economy and Competitiveness,  
55 Spain) with a grant for research projects on health (PI11/01413) through the Network for Prevention and Health  
56  
57  
58  
59

1  
2  
3 Promotion in Primary Care (rediAPP, RD12/0005/0001; RD16/0007/0001), and by European Union ERDF funds. The  
4 funder had no role in the study design, collection, analysis or interpretation of the data, writing the manuscript, or the  
5 decision to submit the paper for publication.  
6  
7

8 **Competing interest:** The authors declare no conflict of interest.  
9

10  
11 **Ethical aspects:** This study follows the tenets of the Helsinki Declaration and of Good Clinical Research Practice and has  
12 been approved by the Ethical and Clinical Research Committee of the IDIAP Jordi Gol. Confidentiality was guaranteed  
13 through data encryption and anonymization in agreement with the data confidentiality Law 15/1999.  
14  
15

16  
17 **Data sharing statement:** No additional data are available.  
18  
19

20 **Figure 1: Flow-chart of patients included in the study, by region.**  
21  
22  
23  
24  
25  
26  
27  
28  
29  
30  
31  
32  
33  
34  
35  
36  
37  
38  
39  
40  
41  
42  
43  
44  
45  
46  
47  
48  
49  
50  
51  
52  
53  
54  
55  
56  
57  
58  
59  
60

## REFERENCES

1. Jha P. Avoidable global cancer deaths and total deaths from smoking. *Nat Rev Cancer* 2009;9:655–64.
2. Murray CJL, Lopez AD. Alternative projections of mortality and disability by cause 1990–2020: Global Burden of Disease Study. *Lancet* 2017;349:1498–504.
3. World Health Organization, and Tobacco Free Initiative. Building blocks to tobacco control: a hand-book. (Tools for advancing tobacco control in the 21st century). Geneva: WHO; 2004.
4. Federico B, Mackenbach JP, Eikemo TA, *et al*. Impact of the 2005 smoke-free policy in Italy on prevalence, cessation and intensity of smoking in the overall population and by educational group. *Addiction* 2012;107:1677–86.
5. Hahn EJ, Rayens MK, Butler KM, *et al*. Smoke-free laws and adult smoking prevalence. *Prev Med* 2008;47:206–9.
6. Nagelhout GE, Willemsen MC, de Vries H. The population impact of smoke-free workplace and hospitality industry legislation on smoking behaviour. Findings from a national population survey. *Addiction* 2011;106:816–23.
7. Hublet A, Schmid H, Clays E, *et al*. Association between tobacco control policies and smoking behaviour among adolescents in 29 European countries. *Addiction* 2009;104:1918–26.
8. Tchicaya A, Lorentz N, Demarest S. Socioeconomic inequalities in smoking and smoking cessation due to a smoking ban: General population-based cross-sectional study in Luxembourg. *PLoS One* 2016;11:1–15.
9. Ye X, Chen S, Yao Z, *et al*. Smoking behaviors before and after implementation of a smoke-free legislation in Guangzhou, China. *BMC Public Health* 2015;15:982.
10. Fichtenberg CM, Glantz SA. Effect of smoke-free workplace on smoking behaviour: systematic review. *BMJ* 2002;325:188.
11. Frazer K, Callinan JE, McHugh J, *et al*. Legislative smoking bans for reducing harms from secondhand smoke exposure, smoking prevalence and tobacco consumption. *Cochrane database Syst Rev* 2016;2:CD005992.
12. Ley de medidas sanitarias frente al tabaquismo y reguladora de la venta, el suministro y la publicidad de los productos del tabaco. L. N. 28/2005 (27 diciembre 2005). Available at: <https://www.boe.es/buscar/doc.php?id=BOE-A-2005-21261> . Accessed 6-3-2017.
13. Nebot M, Fernández E, (Coords) Evaluación del impacto de la ley de medidas sanitarias frente al tabaquismo. Grupo de Trabajo en Tabaquismo de la Sociedad Española de Epidemiología. Barcelona: Sociedad Española de Epidemiología y Ministerio de Sanidad y Política Social, 9-43. 2009. Available in: URL: <http://www.seepidemiologia.es/documents/dummy/Monografia-Grupo%20Trabajo%20sobre%20tabaquismo.pdf>
14. Cordoba R, Villalbi JR, Salvador-Llivina T, *et al*. El proceso en España de la adopción de una legislación eficaz para la prevención del tabaquismo [Spain's process of passing effective smoking prevention legislation]. *Rev Esp Salud Publica* 2006;80:631–45.
15. Nebot M, López MJ, Ariza C, Pérez-Ríos M, *et al*. Impact of the Spanish smoking law on exposure to secondhand smoke in offices and hospitality venues: Before-and-after study. *Environ Health Perspect* 2009;117:344–7.
16. Ley de medidas sanitarias frente al tabaquismo y reguladora de la venta, el suministro y la publicidad de los productos del tabaco (30 December 2010), por la que se modifica la Ley 28/2005, de 26 de diciembre, de medidas sanitarias frente al tabaquismo y reguladora de la venta, el suministro, el consumo y la publicidad de los productos del tabaco. Boletín Oficial del Estado (Spanish Official State Bulletin). L. N. 42/2010.No. 318. Available at: <https://www.boe.es/buscar/act.php?id=BOE-A-2010-20138> . Accessed 6-3-2017.
17. Regidor E, de Mateo S, Ronda E, *et al*. Heterogeneous trend in smoking prevalence by sex and age group following the implementation of a national smoke-free law. *J Epidemiol Community Health* 2011;65:702–8.
18. Regidor E, Pascual C, Giráldez-García C, *et al*. Impact of tobacco prices and smoke-free policy on smoking cessation, by gender and educational group: Spain, 1993–2012. *Int J Drug Policy* 2015;26:1215–21.
19. Perez-Rios M, Fernandez E, Schiaffino A, *et al*. Changes in the prevalence of tobacco consumption and the profile of Spanish smokers after a comprehensive smoke-free policy. *PLoS One* 2015;10:1–9.
20. Jiménez Ruiz CA, Riesco Miranda JA, Altet Gómez N, *et al*. Impact of legislation on passive smoking in Spain. *Respiration* 2014;87:190–5.
21. Catalina Romero C, Gelpi Médez JA, Cortés Arcas MV, *et al*. Evolución en España del consumo de tabaco en población trabajadora desde la entrada en vigor de la Ley 28/2005 de medidas sanitarias frente al tabaquismo [Prevalence of Tobacco Consumption Among Working Population after the Law 42/2010, Spain]. *Rev Esp salud pública* 2010;84:223–7.
22. Catalina Romero C, Sainz Gutiérrez JC, Quevedo Aguado L, *et al*. Prevalencia de consumo de tabaco en población trabajadora tras la entrada en vigor de la Ley 42/2010 [Prevalence of tobacco consumption among working population after the law 42/2010, Spain]. *Rev Esp Salud Publica* 2012;86:177–88.
23. Pérez-Ríos M, Galán I(editors) Evaluación de las políticas de control del tabaquismo en España (Leyes 28/2005 y

- 42/2010) Revisión de la evidencia. Grupo de Trabajo en Tabaquismo de la Sociedad Española de Epidemiología. Barcelona: Sociedad Española de Epidemiología y Ministerio de Sanidad y Política Social, 2017;11-74. Available in: URL: <http://www.seepidemiologia.es/documents/dummy/V9.0%2520-%2520Libro%2520Tabaquismo%25202017%2520-%2520Abierto%2520Final.pdf>
24. de Lluç Bauzà-Amengual M, Blasco-González M, Sánchez-Vazquez E, *et al*. Impacto de la Ley del tabaco en el lugar de trabajo: estudio de seguimiento de una cohorte de trabajadores en España 2005–07 [Impact of the Tobacco Law on the workplace: a follow up study of a cohort of workers in Spain 2005–2007]. *Atención primaria* 2010;42:309–13.
25. Bolívar B, Pareja C, Astier-Peña MP, *et al*. Variability in the performance of preventive services and in the degree of control of identified health problems: a primary care study protocol. *BMC Public Health* 2008;8:281.
26. The International Statistical Classification of Diseases and Related Health Problems (ICD-10th revision) classification of mental and behavioural disorders: clinical descriptions and diagnostic guidelines. Geneva: World Health Organization, 1992. Available at: <http://www.who.int/classifications/icd/en/bluebook.pdf> . Accessed 6-3-2017..
27. Okkes IM, Becker HW, Bernstein RM, *et al*. The March 2002 update of the electronic version of ICPC-2. A step forward to the use of ICD-10 as a nomenclature and a terminology for ICPC-2. *Fam Pract* 2002;19:543–6.
28. Kim H-J, Fay MP, Feuer EJ, *et al*. Permutation tests for joinpoint regression with applications to cancer rates. *Stat Med* 2000;19:335–51. Available at: [http://onlinelibrary.wiley.com/doi/10.1002/\(SICI\)1097-0258\(20000215\)19:3%253C335::AID-SIM336%253E3.0.CO;2-Z/abstract](http://onlinelibrary.wiley.com/doi/10.1002/(SICI)1097-0258(20000215)19:3%253C335::AID-SIM336%253E3.0.CO;2-Z/abstract). Accessed 8-3-2017.
29. Lidón-moyano C, Fu M, Ballbè M, *et al*. Addictive Behaviors Impact of the Spanish smoking laws on tobacco consumption and secondhand smoke exposure : A longitudinal population study. *Addict Behav* 2017;75:30–5.
30. Martín-Sánchez JC, Martínez-Sánchez JM, Bilal U, *et al*. Sex and Age Specific Projections of Smoking Prevalence in Spain: A Bayesian Approach. *Nicotine Tob Res* 2017; ntx120, <https://doi.org/10.1093/ntr/ntx120>.
31. Wilson LM, Avila Tang E, Chander G, *et al*. Impact of tobacco control interventions on smoking initiation, cessation, and prevalence: A systematic review. *J Environ Public Health* 2012; doi:10.1155/2012/961724
32. Guerrero F, Santonja F-J, Villanueva R-J. Analysing the Spanish smoke-free legislation of 2006: a new method to quantify its impact using a dynamic model. *Int J Drug Policy* 2011 Jul;22:247–51.
33. Pinilla J, Abásolo I. The effect of policies regulating tobacco consumption on smoking initiation and cessation in Spain: is it equal across socioeconomic groups? *Tob Induc Dis* 2017;15:8.
34. Longo DR, Johnson JC, Kruse RL, *et al*. A prospective investigation of the impact of smoking bans on tobacco cessation and relapse. *Tob Control* 2001;10:267–72.
35. Shang C. The effect of smoke-free air law in bars on smoking initiation and relapse among teenagers and young adults. *Int J Environ Res Public Health* 2015;12:504–20.
36. Buczkowski K, Marciniowicz L, Czachowski S, *et al*. Motivations toward smoking cessation, reasons for relapse, and modes of quitting: results from a qualitative study among former and current smokers. *Patient Prefer Adherence* 2014;8:1353–63.
37. Schillo BA, Keller PA, Betzner AE, *et al*. Minnesota’s smokefree policies: Impact on cessation program participants. *Am J Prev Med* 2012;43:S171–8.
38. Ley foral 6/2003, de 14 de febrero, de prevención del consumo de tabaco, de protección del aire respirable y de la promoción de la salud en relación al tabaco (Navarra). Available at: <http://www.lexnavarra.navarra.es/detalle.asp?r=3323>. Accessed 31-7-2017
39. Gili M, García Campayo J, Roca M. Crisis económica y salud mental. Informe SESPAS 2014 [Economic crisis and mental health. SESPAS report 2014]. *Gac Sanit* 2014;28 Suppl 1:104–8.
40. Buonanno P, Ranzani M. Thank you for not smoking: Evidence from the Italian smoking ban. *Health Policy* 2013;109:192–9.
41. Camarelles Guillem F, Dalmau González-Gallarza R, Clemente Jiménez L, *et al*. Documento de consenso para la atención clínica al tabaquismo en España [Consensus report for the clinical care of smoking cessation in Spain]. *Med Clin* 2013;140:272.e1-272.e12.
42. Córdoba R, Cabezas C, Camarelles F, *et al*. Recomendaciones sobre el estilo de vida. *Atención primaria* 2012;44:16–22.

Figure 1: Flow-chart of patients included in the study, by region.

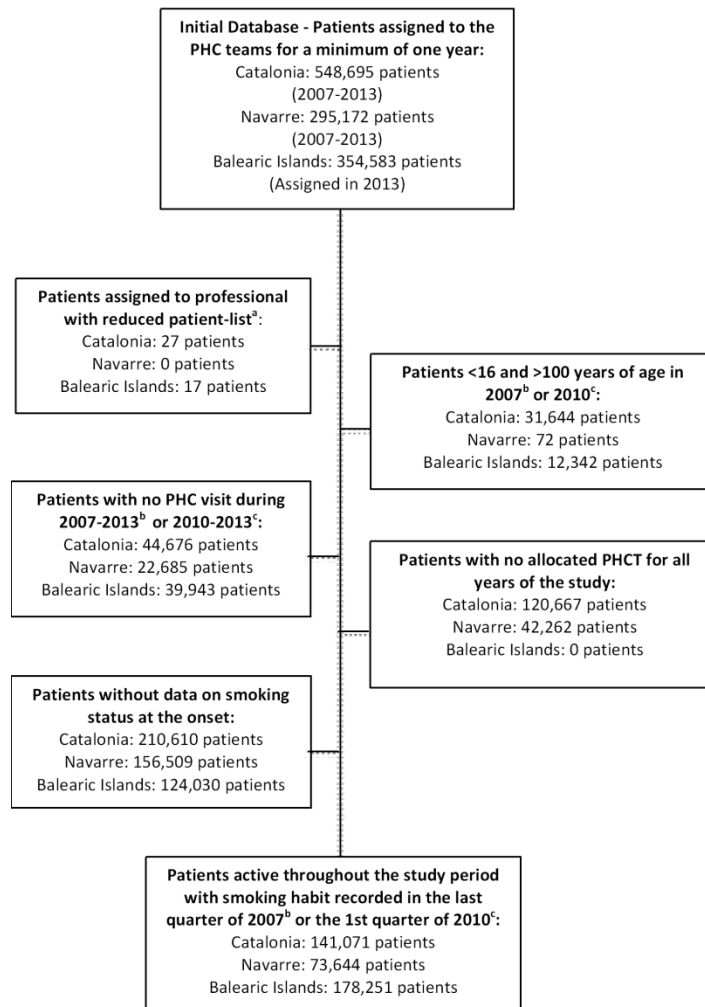

Patients belonged to 22 Primary Health Care Teams in each region

<sup>a</sup> atypical patient-list <400 or >3000; GP with shorter patient lists were accepted if it was their first year in the Primary Health Care Team

<sup>b</sup> In Catalonia or Navarre

<sup>c</sup> In the Balearic Islands

PHC: Primary health care

Figure 1: Flow-chart of patients included in the study, by region

203x293mm (240 x 240 DPI)

**SUPPLEMENTARY DATA FOR EFFECT OF THE SPANISH COMPREHENSIVE SMOKE-FREE LAW ON TIME  
TRENDS IN SMOKING BEHAVIOUR IN PRIMARY HEALTH CARE PATIENTS**

**Table S1: Age-adjusted rates by direct method per 10,000 inhabitants based on the European Standard Population. CATALONIA N=141,071 (2008-2013).**

| Quarter | Smoking status prevalence |         |            | New smokers incidence | New ex-smokers incidence | Ex-smoker relapses incidence |
|---------|---------------------------|---------|------------|-----------------------|--------------------------|------------------------------|
|         | Non smokers               | Smokers | Ex-smokers |                       |                          |                              |
| 2008.1  | 4692.6                    | 4138.9  | 1168.5     | 20.8                  | 254.3                    | 226.9                        |
| 2008.2  | 4679.3                    | 4099.0  | 1221.7     | 21.4                  | 212.9                    | 151.4                        |
| 2008.3  | 4668.8                    | 4073.6  | 1257.6     | 16.6                  | 267.5                    | 218.5                        |
| 2008.4  | 4650.2                    | 4051.7  | 1298.1     | 26.1                  | 317.6                    | 100.4                        |
| 2009.1  | 4638.8                    | 4053.6  | 1307.6     | 25.2                  | 260.1                    | 128.6                        |
| 2009.2  | 4628.2                    | 4036.8  | 1335.1     | 15.8                  | 228.5                    | 78.3                         |
| 2009.3  | 4618.4                    | 4021.6  | 1360.0     | 12.7                  | 161.3                    | 113.7                        |
| 2009.4  | 4604.4                    | 3998.5  | 1397.2     | 19.6                  | 212.7                    | 165.6                        |
| 2010.1  | 4590.0                    | 4001.8  | 1408.2     | 19.0                  | 160.9                    | 123.1                        |
| 2010.2  | 4573.5                    | 3994.3  | 1432.2     | 26.4                  | 135.8                    | 148.8                        |
| 2010.3  | 4560.0                    | 3981.0  | 1459.0     | 20.8                  | 139.0                    | 100.5                        |
| 2010.4  | 4539.7                    | 3957.4  | 1503.0     | 26.8                  | 188.1                    | 112.5                        |
| 2011.1  | 4077.0                    | 3758.0  | 1510.3     | 15.1                  | 171.9                    | 103.2                        |
| 2011.2  | 4068.6                    | 3721.4  | 1555.3     | 12.4                  | 213.0                    | 90.0                         |
| 2011.3  | 4061.6                    | 3696.3  | 1587.3     | 13.0                  | 145.9                    | 81.4                         |
| 2011.4  | 4050.8                    | 3649.8  | 1644.7     | 15.8                  | 255.4                    | 91.3                         |
| 2012.1  | 4012.6                    | 3658.7  | 1673.9     | 13.4                  | 222.7                    | 111.1                        |
| 2012.2  | 4004.9                    | 3629.6  | 1710.7     | 11.3                  | 171.3                    | 91.9                         |
| 2012.3  | 4000.4                    | 3608.5  | 1736.3     | 7.9                   | 118.8                    | 70.7                         |
| 2012.4  | 3990.2                    | 3579.2  | 1775.8     | 11.8                  | 201.3                    | 103.9                        |
| 2013.1  | 3963.0                    | 3601.1  | 1781.2     | 16.5                  | 184.9                    | 141.7                        |
| 2013.2  | 3956.3                    | 3618.6  | 1770.3     | 15.2                  | 136.7                    | 247.6                        |
| 2013.3  | 3952.8                    | 3635.1  | 1757.3     | 9.3                   | 110.7                    | 248.6                        |
| 2013.4  | 3946.5                    | 3659.3  | 1739.5     | 14.7                  | 172.8                    | 334.5                        |

Note: 2008.\*. represents the quarter \* of the year 2008

Rates are per 10,000 inhabitants and age-standardized on the European Standard Population (direct method)

**Table S2: Age-adjusted rates by the direct method per 10,000 inhabitants based on the European Standard Population. NAVARRE N=73,644 (2008-2013).**

| Quarter | Smoking status prevalence |         |            | New smokers incidence | New ex-smokers incidence | Ex-smoker relapses incidence |
|---------|---------------------------|---------|------------|-----------------------|--------------------------|------------------------------|
|         | Non smokers               | Smokers | Ex-smokers |                       |                          |                              |
| 2008.1  | 5652.5                    | 4034.2  | 313.3      | 25.3                  | 175.3                    | 227.0                        |
| 2008.2  | 5642.5                    | 4013.0  | 344.5      | 17.2                  | 181.0                    | 160.4                        |
| 2008.3  | 5632.4                    | 4003.3  | 364.3      | 16.5                  | 109.1                    | 129.4                        |
| 2008.4  | 5620.0                    | 3993.3  | 386.7      | 21.4                  | 127.7                    | 230.3                        |
| 2009.1  | 5645.0                    | 3951.4  | 403.7      | 30.9                  | 136.4                    | 225.4                        |
| 2009.2  | 5630.8                    | 3944.1  | 425.1      | 23.5                  | 132.1                    | 174.0                        |
| 2009.3  | 5623.5                    | 3934.7  | 441.8      | 12.5                  | 100.3                    | 100.7                        |
| 2009.4  | 5614.7                    | 3925.5  | 459.8      | 14.8                  | 109.9                    | 134.7                        |
| 2010.1  | 5618.3                    | 3905.9  | 475.8      | 27.2                  | 111.2                    | 209.4                        |
| 2010.2  | 5605.5                    | 3893.8  | 500.7      | 21.1                  | 114.9                    | 132.5                        |
| 2010.3  | 5595.1                    | 3889.1  | 515.8      | 16.4                  | 82.2                     | 98.7                         |
| 2010.4  | 5581.9                    | 3885.3  | 532.8      | 21.4                  | 89.9                     | 81.2                         |
| 2011.1  | 4990.3                    | 3806.9  | 548.1      | 16.0                  | 136.8                    | 141.3                        |
| 2011.2  | 4979.2                    | 3795.8  | 570.2      | 20.3                  | 116.7                    | 113.8                        |
| 2011.3  | 4972.0                    | 3791.7  | 581.6      | 12.7                  | 48.6                     | 60.2                         |
| 2011.4  | 4964.3                    | 3780.5  | 600.4      | 13.8                  | 99.6                     | 118.6                        |
| 2012.1  | 4910.7                    | 3804.6  | 630.0      | 18.6                  | 127.3                    | 87.6                         |
| 2012.2  | 4902.9                    | 3781.3  | 661.1      | 13.7                  | 130.1                    | 108.4                        |
| 2012.3  | 4897.7                    | 3773.3  | 674.3      | 9.8                   | 75.2                     | 58.6                         |
| 2012.4  | 4888.9                    | 3760.5  | 695.8      | 15.2                  | 110.2                    | 96.0                         |
| 2013.1  | 4886.8                    | 3746.7  | 711.8      | 15.1                  | 121.0                    | 116.4                        |
| 2013.2  | 4876.8                    | 3733.2  | 735.2      | 16.9                  | 104.2                    | 97.4                         |
| 2013.3  | 4870.8                    | 3727.9  | 746.6      | 9.5                   | 60.7                     | 119.1                        |
| 2013.4  | 4861.3                    | 3719.8  | 764.1      | 16.9                  | 90.7                     | 97.8                         |

Note: 2008.\*. represents the quarter \* of the year 2008

Rates are per 10,000 inhabitants and age-standardized on the European Standard Population (direct method)

**Table S3: Age-adjusted rates by the direct method per 10,000 inhabitants based on the European Standard Population. THE BALEARIC ISLANDS N=178,251 (2010-2013).**

| Quarter | Smoking status prevalence |         |            | New smokers incidence | New ex-smokers incidence | Ex-smoker relapses incidence |
|---------|---------------------------|---------|------------|-----------------------|--------------------------|------------------------------|
|         | Non smokers               | Smokers | Ex-smokers |                       |                          |                              |
| 2010.2  | 5411.0                    | 4029.7  | 559.3      | 9.3                   | 158.5                    | 576.6                        |
| 2010.3  | 5406.4                    | 4007.3  | 586.2      | 9.0                   | 151.6                    | 527.0                        |
| 2010.4  | 5401.6                    | 3982.7  | 615.7      | 9.3                   | 158.7                    | 503.7                        |
| 2011.1  | 5375.0                    | 3987.9  | 637.1      | 6.6                   | 149.9                    | 545.7                        |
| 2011.2  | 5372.4                    | 3959.3  | 668.4      | 5.2                   | 170.9                    | 424.4                        |
| 2011.3  | 5369.7                    | 3929.5  | 700.9      | 5.2                   | 160.1                    | 383.9                        |
| 2011.4  | 5367.4                    | 3898.4  | 734.2      | 4.0                   | 169.8                    | 385.6                        |
| 2012.1  | 5345.3                    | 3888.3  | 766.4      | 4.3                   | 188.1                    | 351.8                        |
| 2012.2  | 5344.0                    | 3862.4  | 793.6      | 2.4                   | 137.0                    | 370.6                        |
| 2012.3  | 5342.5                    | 3841.0  | 816.6      | 2.9                   | 113.5                    | 372.6                        |
| 2012.4  | 5341.7                    | 3818.9  | 839.4      | 1.6                   | 133.0                    | 339.2                        |
| 2013.1  | 5324.1                    | 3825.3  | 850.7      | 2.1                   | 130.5                    | 480.5                        |
| 2013.2  | 5317.8                    | 3810.5  | 871.7      | 12.1                  | 106.7                    | 453.0                        |
| 2013.3  | 5308.3                    | 3800.6  | 891.1      | 17.5                  | 93.7                     | 103.9                        |
| 2013.4  | 5298.6                    | 3787.4  | 914.1      | 17.5                  | 116.8                    | 285.1                        |

Note: 2010.\*. represents the quarter \* of the year 2010

Rates are per 10,000 inhabitants and age-standardized on the European Standard Population (direct method)



1  
2  
3  
4  
5  
6  
7  
8  
9  
10  
11  
12  
13  
14  
15  
16  
17  
18  
19  
20  
21  
22  
23  
24  
25  
26  
27  
28  
29  
30  
31  
32  
33  
34  
35  
36  
37  
38  
39  
40  
41  
42  
43  
44  
45  
46

**Table S4. Age-adjusted rates by the direct method for 10,000 inhabitants based on the European Standard Population in CATALONIA. N=72,340 (2008-2013).**

| Quarter | Smoking Status prevalence |        |         |        |            |        | New smokers incidence | New ex-smokers incidence | Ex-smoker relapse incidence |       |       |       |
|---------|---------------------------|--------|---------|--------|------------|--------|-----------------------|--------------------------|-----------------------------|-------|-------|-------|
|         | Non smokers               |        | Smokers |        | Ex-smokers |        |                       |                          |                             |       |       |       |
|         | Female                    | Male   | Female  | Male   | Female     | Male   |                       |                          |                             |       |       |       |
| 2008.1  | 5909.5                    | 3349.2 | 3411.5  | 4910.7 | 679.0      | 1740.1 | 16.6                  | 27.8                     | 246.7                       | 260.5 | 315.2 | 158.2 |
| 2008.2  | 5900.4                    | 3331.6 | 3385.4  | 4856.2 | 714.2      | 1812.2 | 14.3                  | 34.4                     | 266.5                       | 202.9 | 101.2 | 195.0 |
| 2008.3  | 5891.9                    | 3318.8 | 3368.4  | 4822.1 | 739.7      | 1859.1 | 14.0                  | 21.8                     | 275.0                       | 265.9 | 289.0 | 166.5 |
| 2008.4  | 5876.9                    | 3296.1 | 3356.2  | 4789.4 | 766.9      | 1914.5 | 24.0                  | 31.9                     | 254.1                       | 329.2 | 112.0 | 99.6  |
| 2009.1  | 5832.7                    | 3323.5 | 3379.8  | 4769.9 | 787.5      | 1906.6 | 27.8                  | 26.3                     | 289.2                       | 234.0 | 148.8 | 105.2 |
| 2009.2  | 5823.1                    | 3311.7 | 3366.5  | 4749.0 | 810.4      | 1939.3 | 13.7                  | 19.7                     | 182.0                       | 237.8 | 89.5  | 79.2  |
| 2009.3  | 5814.6                    | 3300.6 | 3356.3  | 4728.4 | 829.2      | 1971.1 | 11.9                  | 15.3                     | 154.4                       | 165.8 | 181.4 | 65.8  |
| 2009.4  | 5804.4                    | 3282.4 | 3335.4  | 4702.6 | 860.2      | 2015.0 | 14.3                  | 28.0                     | 243.3                       | 203.9 | 188.5 | 152.0 |
| 2010.1  | 5757.2                    | 3312.5 | 3359.5  | 4679.7 | 883.3      | 2007.8 | 14.0                  | 26.7                     | 201.5                       | 144.1 | 133.5 | 109.4 |
| 2010.2  | 5744.1                    | 3292.3 | 3355.5  | 4668.2 | 900.4      | 2039.6 | 24.1                  | 30.4                     | 146.6                       | 131.6 | 164.1 | 152.0 |
| 2010.3  | 5730.0                    | 3279.4 | 3345.8  | 4650.5 | 924.2      | 2070.2 | 20.7                  | 22.7                     | 156.1                       | 134.4 | 106.6 | 98.0  |
| 2010.4  | 5710.9                    | 3256.8 | 3332.3  | 4616.4 | 956.8      | 2126.8 | 30.9                  | 24.3                     | 205.4                       | 177.3 | 132.2 | 114.9 |
| 2011.1  | 5231.2                    | 2821.0 | 3138.8  | 4408.8 | 975.2      | 2115.4 | 15.0                  | 16.8                     | 181.1                       | 166.1 | 62.6  | 146.7 |
| 2011.2  | 5223.4                    | 2811.7 | 3115.8  | 4356.5 | 1006.0     | 2177.1 | 12.2                  | 14.3                     | 231.6                       | 203.8 | 118.9 | 65.4  |
| 2011.3  | 5216.7                    | 2804.3 | 3095.4  | 4326.8 | 1033.2     | 2214.1 | 12.4                  | 15.2                     | 166.4                       | 136.0 | 93.0  | 68.5  |
| 2011.4  | 5209.6                    | 2789.1 | 3057.6  | 4270.9 | 1078.0     | 2285.2 | 12.1                  | 21.2                     | 308.9                       | 241.6 | 111.0 | 78.8  |
| 2012.1  | 5142.2                    | 2792.0 | 3082.8  | 4259.8 | 1120.2     | 2293.5 | 9.3                   | 19.1                     | 251.1                       | 216.5 | 140.4 | 83.6  |
| 2012.2  | 5136.1                    | 2782.4 | 3059.1  | 4225.1 | 1150.0     | 2337.7 | 10.4                  | 12.4                     | 215.6                       | 162.3 | 107.4 | 75.8  |
| 2012.3  | 5132.0                    | 2777.7 | 3041.8  | 4200.0 | 1171.4     | 2367.6 | 8.7                   | 7.3                      | 135.6                       | 113.1 | 61.0  | 80.2  |
| 2012.4  | 5123.4                    | 2765.4 | 3020.5  | 4161.9 | 1201.3     | 2417.9 | 10.2                  | 16.2                     | 192.8                       | 203.5 | 128.5 | 89.1  |
| 2013.1  | 5063.9                    | 2781.5 | 3055.9  | 4167.2 | 1225.4     | 2396.5 | 15.4                  | 19.9                     | 213.2                       | 180.4 | 167.8 | 123.5 |
| 2013.2  | 5058.8                    | 2773.4 | 3057.2  | 4202.9 | 1229.3     | 2368.9 | 10.3                  | 21.9                     | 146.9                       | 131.3 | 216.4 | 251.9 |
| 2013.3  | 5055.0                    | 2770.2 | 3060.2  | 4234.1 | 1230.0     | 2340.9 | 9.0                   | 10.7                     | 127.0                       | 106.7 | 217.7 | 263.3 |
| 2013.4  | 5049.2                    | 2763.3 | 3063.6  | 4281.9 | 1232.5     | 2300.1 | 11.8                  | 21.1                     | 202.8                       | 159.2 | 325.6 | 315.6 |

Note: 2008.\*. represents the quarter \* of the year 2008

Rates are per 10,000 inhabitants and age-standardized on the European Standard Population (direct method)

**Table S5. Age-adjusted rates by the direct method per 10,000 inhabitants based on the European Standard Population in NAVARRE. N=37,898 (2008-2013).**

| Quarter | Smoking Status prevalence |        |         |        |            |       | New smokers incidence | New ex-smokers incidence | Ex-smoker relapse incidence |        |       |       |
|---------|---------------------------|--------|---------|--------|------------|-------|-----------------------|--------------------------|-----------------------------|--------|-------|-------|
|         | Non smokers               |        | Smokers |        | Ex-smokers |       |                       |                          |                             | Female | Male  |       |
|         | Female                    | Male   | Female  | Male   | Female     | Male  |                       |                          |                             | Female | Male  |       |
| 2008.1  | 6224.8                    | 5021.1 | 3542.5  | 4569.6 | 232.7      | 409.3 | 22.3                  | 31.0                     | 152.7                       | 172.3  | 164.4 | 295.8 |
| 2008.2  | 6215.3                    | 5010.6 | 3527.8  | 4539.7 | 256.9      | 449.7 | 15.2                  | 20.3                     | 168.7                       | 187.7  | 136.9 | 173.7 |
| 2008.3  | 6207.4                    | 4998.8 | 3518.5  | 4528.6 | 274.2      | 472.6 | 11.5                  | 22.1                     | 147.1                       | 97.1   | 147.9 | 123.7 |
| 2008.4  | 6198.6                    | 4982.4 | 3510.9  | 4515.4 | 290.4      | 502.2 | 14.8                  | 30.0                     | 157.9                       | 125.6  | 296.5 | 98.8  |
| 2009.1  | 6209.7                    | 5028.3 | 3485.7  | 4451.5 | 304.6      | 520.2 | 24.9                  | 39.7                     | 184.8                       | 111.3  | 254.0 | 197.0 |
| 2009.2  | 6197.8                    | 5011.6 | 3480.3  | 4441.1 | 321.9      | 547.3 | 17.4                  | 32.6                     | 177.2                       | 127.7  | 152.7 | 171.7 |
| 2009.3  | 6191.6                    | 5003.2 | 3475.5  | 4426.3 | 332.9      | 570.4 | 10.7                  | 15.2                     | 108.4                       | 98.3   | 73.4  | 111.5 |
| 2009.4  | 6186.2                    | 4990.0 | 3470.2  | 4413.1 | 343.6      | 596.9 | 8.4                   | 24.0                     | 97.2                        | 115.8  | 126.6 | 134.7 |
| 2010.1  | 6175.4                    | 5014.1 | 3464.6  | 4375.5 | 360.0      | 610.4 | 22.6                  | 33.5                     | 115.7                       | 112.9  | 224.3 | 208.6 |
| 2010.2  | 6164.6                    | 4999.4 | 3455.7  | 4359.8 | 379.7      | 640.8 | 16.4                  | 27.9                     | 119.1                       | 114.5  | 106.4 | 129.5 |
| 2010.3  | 6154.5                    | 4988.6 | 3456.0  | 4350.4 | 389.5      | 661.0 | 16.2                  | 17.0                     | 111.3                       | 75.9   | 88.3  | 94.5  |
| 2010.4  | 6142.1                    | 4974.6 | 3455.4  | 4343.4 | 402.5      | 682.1 | 17.8                  | 26.3                     | 126.9                       | 80.9   | 71.3  | 85.7  |
| 2011.1  | 5541.4                    | 4399.8 | 3388.4  | 4248.3 | 415.4      | 697.1 | 12.2                  | 21.0                     | 146.2                       | 135.4  | 91.3  | 183.2 |
| 2011.2  | 5532.4                    | 4386.6 | 3381.0  | 4233.8 | 431.9      | 724.9 | 15.5                  | 26.8                     | 151.1                       | 110.6  | 117.2 | 103.9 |
| 2011.3  | 5524.7                    | 4379.8 | 3377.8  | 4228.5 | 442.7      | 737.0 | 12.6                  | 13.7                     | 55.8                        | 44.9   | 61.6  | 54.1  |
| 2011.4  | 5518.9                    | 4370.0 | 3369.7  | 4213.6 | 456.6      | 761.7 | 9.6                   | 19.5                     | 118.2                       | 95.4   | 70.0  | 160.8 |
| 2012.1  | 5452.1                    | 4335.6 | 3408.9  | 4217.7 | 484.2      | 792.0 | 15.9                  | 22.5                     | 129.3                       | 126.5  | 106.9 | 65.3  |
| 2012.2  | 5445.6                    | 4326.1 | 3389.4  | 4190.1 | 510.2      | 829.0 | 11.7                  | 17.2                     | 125.1                       | 131.6  | 95.3  | 114.5 |
| 2012.3  | 5442.6                    | 4318.6 | 3385.2  | 4178.7 | 517.4      | 847.9 | 6.2                   | 14.2                     | 67.6                        | 78.0   | 68.6  | 41.2  |
| 2012.4  | 5434.5                    | 4308.9 | 3379.5  | 4159.1 | 531.2      | 877.2 | 12.5                  | 19.6                     | 130.8                       | 110.0  | 66.7  | 126.7 |
| 2013.1  | 5420.0                    | 4323.0 | 3380.9  | 4128.0 | 544.3      | 894.2 | 14.1                  | 16.4                     | 133.8                       | 124.7  | 68.6  | 157.5 |
| 2013.2  | 5413.7                    | 4309.1 | 3367.7  | 4114.5 | 563.9      | 921.6 | 10.1                  | 25.2                     | 103.2                       | 104.7  | 87.0  | 98.4  |
| 2013.3  | 5408.6                    | 4302.1 | 3363.6  | 4108.1 | 573.1      | 935.1 | 7.2                   | 12.7                     | 72.3                        | 57.3   | 152.7 | 85.9  |
| 2013.4  | 5399.9                    | 4291.6 | 3360.4  | 4094.8 | 584.9      | 958.8 | 13.9                  | 21.7                     | 65.6                        | 102.8  | 72.2  | 116.0 |

Note: 2008.\*. represents the quarter \* of the year 2008

Rates are per 10,000 inhabitants and age-standardized on the European Standard Population (direct method)

1  
2  
3  
4  
5  
6  
7  
8  
9  
10  
11  
12  
13  
14  
15  
16  
17  
18  
19  
20  
21  
22  
23  
24  
25  
26  
27  
28  
29  
30  
31  
32  
33  
34  
35  
36  
37  
38  
39  
40  
41  
42  
43  
44  
45  
46

**Table S6. Age-adjusted rates by the direct method per 10,000 inhabitants based on the European Standard Population in THE BALEARIC ISLANDS. N= 94,164 (2010-2013).**

| Quarter | Smoking Status prevalence |        |         |        |            |        | New smokers incidence | New ex-smokers incidence | Ex-smoker relapse incidence |       |       |       |
|---------|---------------------------|--------|---------|--------|------------|--------|-----------------------|--------------------------|-----------------------------|-------|-------|-------|
|         | Non smokers               |        | Smokers |        | Ex-smokers |        |                       |                          |                             |       |       |       |
|         | Female                    | Male   | Female  | Male   | Female     | Male   |                       |                          |                             |       |       |       |
| 2010.2  | 6224.8                    | 4484.3 | 3412.3  | 4723.7 | 362.9      | 792.0  | 8.9                   | 9.9                      | 106.8                       | 169.6 | 631.1 | 560.7 |
| 2010.3  | 6220.5                    | 4479.3 | 3395.5  | 4695.0 | 384.0      | 825.7  | 8.2                   | 10.4                     | 149.6                       | 147.6 | 576.9 | 435.9 |
| 2010.4  | 6215.8                    | 4474.3 | 3376.3  | 4664.4 | 408.0      | 861.2  | 8.8                   | 10.1                     | 179.3                       | 150.7 | 484.7 | 571.6 |
| 2011.1  | 6171.2                    | 4472.1 | 3395.3  | 4651.8 | 433.5      | 876.2  | 6.7                   | 6.6                      | 141.1                       | 146.7 | 562.7 | 508.9 |
| 2011.2  | 6168.5                    | 4469.8 | 3375.7  | 4612.8 | 455.9      | 917.5  | 5.2                   | 5.4                      | 140.3                       | 173.8 | 446.1 | 426.0 |
| 2011.3  | 6165.8                    | 4467.0 | 3353.4  | 4574.6 | 480.8      | 958.4  | 4.9                   | 6.0                      | 162.5                       | 154.9 | 400.9 | 391.6 |
| 2011.4  | 6163.2                    | 4465.3 | 3330.1  | 4534.6 | 506.8      | 1000.1 | 4.6                   | 3.4                      | 149.3                       | 170.9 | 296.8 | 540.3 |
| 2012.1  | 6118.6                    | 4474.0 | 3337.9  | 4501.2 | 543.6      | 1024.8 | 3.7                   | 5.1                      | 179.3                       | 182.1 | 306.5 | 461.7 |
| 2012.2  | 6117.0                    | 4473.2 | 3318.1  | 4468.3 | 564.9      | 1058.5 | 2.8                   | 1.9                      | 109.0                       | 139.6 | 359.8 | 348.7 |
| 2012.3  | 6115.2                    | 4471.9 | 3302.0  | 4440.5 | 582.8      | 1087.6 | 3.2                   | 2.5                      | 103.4                       | 112.8 | 376.5 | 363.9 |
| 2012.4  | 6114.3                    | 4471.2 | 3285.7  | 4411.7 | 600.0      | 1117.0 | 1.7                   | 1.6                      | 122.8                       | 132.9 | 414.0 | 213.4 |
| 2013.1  | 6077.2                    | 4479.2 | 3302.2  | 4406.4 | 620.6      | 1114.4 | 0.9                   | 4.1                      | 137.9                       | 122.6 | 492.0 | 470.3 |
| 2013.2  | 6070.8                    | 4473.1 | 3291.1  | 4387.8 | 638.2      | 1139.1 | 11.9                  | 12.7                     | 91.0                        | 105.4 | 410.8 | 532.6 |
| 2013.3  | 6056.9                    | 4468.7 | 3288.0  | 4370.1 | 655.1      | 1161.2 | 23.4                  | 10.4                     | 94.4                        | 90.1  | 110.4 | 87.5  |
| 2013.4  | 6046.1                    | 4460.3 | 3280.8  | 4349.5 | 673.1      | 1190.2 | 18.2                  | 16.9                     | 100.0                       | 121.4 | 342.4 | 116.1 |

Note: 2010.\*. represents the quarter \* of the year 2010

Rates are per 10,000 inhabitants and age-standardized on the European Standard Population (direct method)

**STROBE 2007 (v4) Statement—Checklist of items that should be included in reports of *cross-sectional studies***

| Section/Topic                | Item # | Recommendation                                                                                                                                                                       | Reported on page # |
|------------------------------|--------|--------------------------------------------------------------------------------------------------------------------------------------------------------------------------------------|--------------------|
| <b>Title and abstract</b>    | 1      | (a) Indicate the study's design with a commonly used term in the title or the abstract                                                                                               | 3                  |
|                              |        | (b) Provide in the abstract an informative and balanced summary of what was done and what was found                                                                                  | 3                  |
| <b>Introduction</b>          |        |                                                                                                                                                                                      |                    |
| Background/rationale         | 2      | Explain the scientific background and rationale for the investigation being reported                                                                                                 | 5-6                |
| Objectives                   | 3      | State specific objectives, including any prespecified hypotheses                                                                                                                     | 6                  |
| <b>Methods</b>               |        |                                                                                                                                                                                      |                    |
| Study design                 | 4      | Present key elements of study design early in the paper                                                                                                                              | 6                  |
| Setting                      | 5      | Describe the setting, locations, and relevant dates, including periods of recruitment, exposure, follow-up, and data collection                                                      | 6-7                |
| Participants                 | 6      | (a) Give the eligibility criteria, and the sources and methods of selection of participants                                                                                          | 6-7                |
| Variables                    | 7      | Clearly define all outcomes, exposures, predictors, potential confounders, and effect modifiers. Give diagnostic criteria, if applicable                                             | 7                  |
| Data sources/<br>measurement | 8*     | For each variable of interest, give sources of data and details of methods of assessment (measurement). Describe comparability of assessment methods if there is more than one group | 7                  |
| Bias                         | 9      | Describe any efforts to address potential sources of bias                                                                                                                            | 7                  |
| Study size                   | 10     | Explain how the study size was arrived at                                                                                                                                            | 6 + Figure 1       |
| Quantitative variables       | 11     | Explain how quantitative variables were handled in the analyses. If applicable, describe which groupings were chosen and why                                                         | 7-8                |
| Statistical methods          | 12     | (a) Describe all statistical methods, including those used to control for confounding                                                                                                | 7-8                |
|                              |        | (b) Describe any methods used to examine subgroups and interactions                                                                                                                  | 7-8                |
|                              |        | (c) Explain how missing data were addressed                                                                                                                                          | 6 + 15             |
|                              |        | (d) If applicable, describe analytical methods taking account of sampling strategy                                                                                                   |                    |
|                              |        | (e) Describe any sensitivity analyses                                                                                                                                                |                    |
| <b>Results</b>               |        |                                                                                                                                                                                      |                    |

|                          |     |                                                                                                                                                                                                              |                  |
|--------------------------|-----|--------------------------------------------------------------------------------------------------------------------------------------------------------------------------------------------------------------|------------------|
| Participants             | 13* | (a) Report numbers of individuals at each stage of study—eg numbers potentially eligible, examined for eligibility, confirmed eligible, included in the study, completing follow-up, and analysed            | 6, 8. Figure 1   |
|                          |     | (b) Give reasons for non-participation at each stage                                                                                                                                                         | 6. Figure 1      |
|                          |     | (c) Consider use of a flow diagram                                                                                                                                                                           | 6. Figure 1      |
| Descriptive data         | 14* | (a) Give characteristics of study participants (eg demographic, clinical, social) and information on exposures and potential confounders                                                                     | 8. Table 1.      |
|                          |     | (b) Indicate number of participants with missing data for each variable of interest                                                                                                                          | 8                |
| Outcome data             | 15* | Report numbers of outcome events or summary measures                                                                                                                                                         | 8-12. Tables 2-4 |
| Main results             | 16  | (a) Give unadjusted estimates and, if applicable, confounder-adjusted estimates and their precision (eg, 95% confidence interval). Make clear which confounders were adjusted for and why they were included | 8-12. Tables 2-4 |
|                          |     | (b) Report category boundaries when continuous variables were categorized                                                                                                                                    |                  |
|                          |     | (c) If relevant, consider translating estimates of relative risk into absolute risk for a meaningful time period                                                                                             |                  |
| Other analyses           | 17  | Report other analyses done—eg analyses of subgroups and interactions, and sensitivity analyses                                                                                                               |                  |
| <b>Discussion</b>        |     |                                                                                                                                                                                                              |                  |
| Key results              | 18  | Summarise key results with reference to study objectives                                                                                                                                                     | 13               |
| Limitations              | 19  | Discuss limitations of the study, taking into account sources of potential bias or imprecision. Discuss both direction and magnitude of any potential bias                                                   | 14-15            |
| Interpretation           | 20  | Give a cautious overall interpretation of results considering objectives, limitations, multiplicity of analyses, results from similar studies, and other relevant evidence                                   | 13-15            |
| Generalisability         | 21  | Discuss the generalisability (external validity) of the study results                                                                                                                                        | 15               |
| <b>Other information</b> |     |                                                                                                                                                                                                              |                  |
| Funding                  | 22  | Give the source of funding and the role of the funders for the present study and, if applicable, for the original study on which the present article is based                                                | 15-16            |

\*Give information separately for cases and controls in case-control studies and, if applicable, for exposed and unexposed groups in cohort and cross-sectional studies.

**Note:** An Explanation and Elaboration article discusses each checklist item and gives methodological background and published examples of transparent reporting. The STROBE checklist is best used in conjunction with this article (freely available on the Web sites of PLoS Medicine at <http://www.plosmedicine.org/>, Annals of Internal Medicine at <http://www.annals.org/>, and Epidemiology at <http://www.epidem.com/>). Information on the STROBE Initiative is available at [www.strobe-statement.org](http://www.strobe-statement.org).

# BMJ Open

## Effect of the comprehensive smoke-free law on time trends in smoking behaviour in Primary Health Care patients in Spain: a longitudinal observational study

|                                 |                                                                                                                                                                                                                                                                                                                                                                                                                                                                                                                                                                                                                                                                                                                                                                                                                                                                                                                                                                                                                                                                                                                                                                                                                                                                                                                    |
|---------------------------------|--------------------------------------------------------------------------------------------------------------------------------------------------------------------------------------------------------------------------------------------------------------------------------------------------------------------------------------------------------------------------------------------------------------------------------------------------------------------------------------------------------------------------------------------------------------------------------------------------------------------------------------------------------------------------------------------------------------------------------------------------------------------------------------------------------------------------------------------------------------------------------------------------------------------------------------------------------------------------------------------------------------------------------------------------------------------------------------------------------------------------------------------------------------------------------------------------------------------------------------------------------------------------------------------------------------------|
| Journal:                        | <i>BMJ Open</i>                                                                                                                                                                                                                                                                                                                                                                                                                                                                                                                                                                                                                                                                                                                                                                                                                                                                                                                                                                                                                                                                                                                                                                                                                                                                                                    |
| Manuscript ID                   | bmjopen-2017-020120.R1                                                                                                                                                                                                                                                                                                                                                                                                                                                                                                                                                                                                                                                                                                                                                                                                                                                                                                                                                                                                                                                                                                                                                                                                                                                                                             |
| Article Type:                   | Research                                                                                                                                                                                                                                                                                                                                                                                                                                                                                                                                                                                                                                                                                                                                                                                                                                                                                                                                                                                                                                                                                                                                                                                                                                                                                                           |
| Date Submitted by the Author:   | 13-Feb-2018                                                                                                                                                                                                                                                                                                                                                                                                                                                                                                                                                                                                                                                                                                                                                                                                                                                                                                                                                                                                                                                                                                                                                                                                                                                                                                        |
| Complete List of Authors:       | <p>Pons-Vigués, Mariona; Institut Universitari d'Investigació en Atenció Primària Jordi Gol (IDIAP Jordi Gol), Rando-Matos , Yolanda; Centre d'Atenció Primària (CAP) Florida Nord. Institut Català de la Salut (ICS); Institut Universitari d'Investigació en Atenció Primària Jordi Gol (IDIAP Jordi Gol)</p> <p>Rodriguez-Blanco, Teresa; IDIAP Jordi Gol Foundation IDIAP Jordi Gol Foundation, Department of Epidemiology and Biostatistics</p> <p>Ballvé-Moreno , Josep Lluís ; Centre d'Atenció Primària (CAP) Florida Nord. Institut Català de la Salut (ICS) ; Institut Universitari d'Investigació en Atenció Primària Jordi Gol (IDIAP Jordi Gol)</p> <p>Ripoll, Joana; Balears Health services-IbSalut, 1. Primary Care Research Unit of Mallorca</p> <p>Llobera, Joan; Balears Health services-IbSalut, 1. Primary Care Research Unit of Mallorca</p> <p>Morán, Julio; Equipo de Atención Primaria de Tafalla. Servicio Navarro de Salud</p> <p>López-Jiménez, Tomàs; Institut Universitari d'Investigació en Atenció Primària Jordi Gol (IDIAP Jordi Gol)</p> <p>Violan-Fors, Concepción; Institut Universitari d'Investigació en Atenció Primària Jordi Gol (IDIAP Jordi Gol)</p> <p>Bolibar, Bonaventura; Institut Universitari d'Investigació en Atenció Primària Jordi Gol (IDIAP Jordi Gol)</p> |
| <b>Primary Subject Heading</b>: | Smoking and tobacco                                                                                                                                                                                                                                                                                                                                                                                                                                                                                                                                                                                                                                                                                                                                                                                                                                                                                                                                                                                                                                                                                                                                                                                                                                                                                                |
| Secondary Subject Heading:      | Epidemiology, General practice / Family practice, Health policy                                                                                                                                                                                                                                                                                                                                                                                                                                                                                                                                                                                                                                                                                                                                                                                                                                                                                                                                                                                                                                                                                                                                                                                                                                                    |
| Keywords:                       | Electronic health records, Joinpoint analysis, Primary Health Care, Smoke-Free Policy, Smoking                                                                                                                                                                                                                                                                                                                                                                                                                                                                                                                                                                                                                                                                                                                                                                                                                                                                                                                                                                                                                                                                                                                                                                                                                     |
|                                 |                                                                                                                                                                                                                                                                                                                                                                                                                                                                                                                                                                                                                                                                                                                                                                                                                                                                                                                                                                                                                                                                                                                                                                                                                                                                                                                    |

SCHOLARONE™  
Manuscripts

1  
2  
3 **Effect of the comprehensive smoke-free law on time trends in smoking behaviour in Primary Health Care patients in**  
4 **Spain: a longitudinal observational study**  
5

6  
7 **Author names and affiliations**

8 Mariona Pons-Vigués <sup>a,b,c</sup>

9 <sup>a</sup> Institut Universitari d'Investigació en Atenció Primària Jordi Gol (IDIAP Jordi Gol), Barcelona, Spain

10 <sup>b</sup> Universitat Autònoma de Barcelona, Bellaterra (Cerdanyola del Vallès), Spain.

11 <sup>c</sup> Universitat de Girona, Girona, Spain

12 e-mail: [mponsv@idiapjgol.info](mailto:mponsv@idiapjgol.info)

13  
14 Yolanda Rando-Matos <sup>d,a</sup>

15 <sup>d</sup> Centre d'Atenció Primària (CAP) Florida Nord. Institut Català de la Salut (ICS), Hospitalet de Llobregat, Barcelona, Spain

16 <sup>a</sup> Institut Universitari d'Investigació en Atenció Primària Jordi Gol (IDIAP Jordi Gol), Barcelona, Spain

17 e-mail: [yrando@ambitcp.catsalut.net](mailto:yrando@ambitcp.catsalut.net)

18  
19 Teresa Rodriguez-Blanco <sup>a,b</sup>

20 <sup>a</sup> Institut Universitari d'Investigació en Atenció Primària Jordi Gol (IDIAP Jordi Gol), Barcelona, Spain

21 <sup>b</sup> Universitat Autònoma de Barcelona, Bellaterra (Cerdanyola del Vallès), Spain

22 e-mail: [trodriquez@idiapjgol.org](mailto:trodriquez@idiapjgol.org)

23  
24 Josep Lluís Ballvé-Moreno <sup>d,a</sup>

25 <sup>d</sup> Centre d'Atenció Primària (CAP) Florida Nord. Institut Català de la Salut (ICS), Hospitalet de Llobregat, Barcelona, Spain

26 <sup>a</sup> Institut Universitari d'Investigació en Atenció Primària Jordi Gol (IDIAP Jordi Gol), Barcelona, Spain

27 e-mail: [jllalve@ambitcp.catsalut.net](mailto:jllalve@ambitcp.catsalut.net)

28  
29 Joana Ripoll <sup>e,f</sup>

30 <sup>e</sup> Primary Care Research Unit of Mallorca, Balears Health Services-Ibsalut, Palma, Spain

31 <sup>f</sup> Balearic Islands Health Research Institute (IdISBa), Palma, Spain

32 e-mail: [jripoll@ibsalut.caib.es](mailto:jripoll@ibsalut.caib.es)

33  
34 Joan Llobera <sup>e,f</sup>

35 <sup>e</sup> Primary Care Research Unit of Mallorca, Balears Health Services-Ibsalut, Palma, Spain

36 <sup>f</sup> Balearic Islands Health Research Institute (IdISBa), Palma, Spain

37 e-mail: [jllobera@ibsalut.caib.es](mailto:jllobera@ibsalut.caib.es)

38  
39 Julio Morán <sup>g</sup>

40 <sup>g</sup> Equipo de Atención Primaria de Tafalla. Servicio Navarro de Salud. Barasoain, Navarra, Spain.

41 e-mail: [jmoranpi@navarra.es](mailto:jmoranpi@navarra.es)

42  
43 Tomàs López-Jiménez <sup>a,b</sup>

44 <sup>a</sup> Institut Universitari d'Investigació en Atenció Primària Jordi Gol (IDIAP Jordi Gol), Barcelona, Spain

45 <sup>b</sup> Universitat Autònoma de Barcelona, Bellaterra (Cerdanyola del Vallès), Spain

46 e-mail: [tlopez@idiapjgol.org](mailto:tlopez@idiapjgol.org)

47  
48 Concepció Violán-Fors <sup>a,b</sup>

49 <sup>a</sup> Institut Universitari d'Investigació en Atenció Primària Jordi Gol (IDIAP Jordi Gol), Barcelona, Spain

50 <sup>b</sup> Universitat Autònoma de Barcelona, Bellaterra (Cerdanyola del Vallès), Spain

51 e-mail: [cviolan@idiapjgol.org](mailto:cviolan@idiapjgol.org)

52  
53 Bonaventura Bolibar <sup>a,b</sup>

54 <sup>a</sup> Institut Universitari d'Investigació en Atenció Primària Jordi Gol (IDIAP Jordi Gol), Barcelona, Spain

55 <sup>b</sup> Universitat Autònoma de Barcelona, Bellaterra (Cerdanyola del Vallès), Spain

56 e-mail: [bbolibar@idiapjgol.org](mailto:bbolibar@idiapjgol.org)

1  
2  
3 **Corresponding author:** Mariona Pons-Vigués

4 e-mail: [mponsv@idiapjgol.info](mailto:mponsv@idiapjgol.info)

5 Institut Universitari d'Investigació en Atenció Primària Jordi Gol (IDIAP Jordi Gol), Barcelona, Spain

6 Av. Gran Via de les Corts Catalanes 587, àtic

7 08007 - Barcelona

8 Tel: 0034 93 482 42 53

9 [www.idiapjgol.org](http://www.idiapjgol.org)

10 <http://orcid.org/0000-0002-7929-3701>

11  
12 **Word count:** 4068 words

13  
14  
15  
16  
17  
18  
19  
20  
21  
22  
23  
24  
25  
26  
27  
28  
29  
30  
31  
32  
33  
34  
35  
36  
37  
38  
39  
40  
41  
42  
43  
44  
45  
46  
47  
48  
49  
50  
51  
52  
53  
54  
55  
56  
57  
58  
59  
60

For peer review only



1  
2  
3 **Effect of the comprehensive smoke-free law on time trends in smoking behaviour in Primary Health Care patients in**  
4 **Spain: a longitudinal observational study**  
5

6  
7 **ABSTRACT**

8 **Objective:** This study aimed to analyse the impact of comprehensive smoke-free legislation on the prevalence and  
9 incidence of adult smoking in Primary Health Care patients from three Spanish regions, overall and stratified by sex.

10  
11 **Design:** Longitudinal observational study conducted between 2008 and 2013.

12  
13 **Setting:** 66 Primary Health Care teams in Catalonia, Navarre and the Balearic Islands (Spain).

14  
15 **Participants:** Population over 15 years of age assigned to Primary Health Care teams.

16  
17 **Primary and secondary outcomes measures:** Quarterly age-standardized prevalence of non-smoker, smoker and ex-  
18 smoker and incidence of new smoker, new ex-smoker and ex-smoker relapse rates were estimated with data retrieved  
19 from PHC electronic health records. Joinpoint analysis was used to analyse the trends of age-standardized prevalence  
20 and incidence rates. Trends were expressed as annual percentage change and average annual percent change.

21  
22 **Results:** The overall standardized smoker prevalence rate showed a significant downward trend (higher in men than  
23 women) and the overall standardized ex-smoker prevalence rate showed a significant increased trend (higher in women  
24 than men) in the three regions. Standardized smoker and ex-smoker prevalence rates were higher for men than women  
25 in all regions. With regard to overall trends of incidence rates, new smokers decreased significantly in Catalonia and  
26 Navarre and similarly in men and women, new ex-smokers decreased significantly and more in men in Catalonia and  
27 the Balearic Islands, and ex-smoker relapse increased in Catalonia, particularly in women, and decreased in Navarre.

28  
29  
30 **Conclusions:** Trends on smoking behaviour in Primary Health Care patients remain unchanged after the implementation  
31 of comprehensive smoke-free legislation.  
32

33  
34 **Keywords:** Electronic health records; Joinpoint analysis; Primary Health Care; Smoke-Free Policy; Smoking.  
35  
36  
37  
38  
39  
40  
41  
42  
43  
44  
45  
46  
47  
48  
49  
50  
51  
52  
53  
54  
55  
56  
57  
58  
59  
60

**Strengths and limitations of this study**

- To our knowledge, no studies have been published on the impact of the Spanish comprehensive smoke-free legislation in all adult Primary Health Care patients
- Used as a research tool, electronic health records portray real-life conditions and provide comprehensive, long-term health histories from a large population sample
- The results of quarterly data by joinpoint analysis provides more precise information than an analysis before-after the implementation of the Law
- This study only considered age and sex since other variables were not available for the adjusted analysis.
- The study period started later (shorter follow-up) in the Balearic Islands to ensure reliability of data

## Effect of the Spanish comprehensive smoke-free law on time trends in smoking behaviour in Primary Health Care patients in Spain: a longitudinal observational study

### INTRODUCTION

Smoking is the leading worldwide cause of preventable death.<sup>1</sup> According to the World Health Organization (WHO), it is estimated that at least 30 million people may die prematurely from tobacco-related diseases.<sup>2</sup> Legislative measures have been adopted to protect people's health in public areas and workplaces. These include increasing the price of cigarettes, banning advertising, sponsorship and smoking in workplaces and public spaces, displaying warnings on tobacco packets and implementing prevention programs.<sup>3</sup>

Some studies show a decrease in smoking prevalence since the introduction of smoke-free legislation (SFL).<sup>4-9</sup> A meta-analysis of 26 studies on the effect of the smoke-free workplace in various countries concluded in 2002 that smoke-free workplaces protect not only non-smokers from the dangers of passive smoking, but they also encourage smokers to reduce tobacco consumption. The authors concluded that SFL is associated with a 3% to 4% reduction in tobacco consumption.<sup>10</sup> In contrast, a Cochrane review published in 2016 which included 24 studies on smoking behaviour showed inconsistencies regarding the impact of smoking bans on smoking prevalence and tobacco consumption.<sup>11</sup>

On January 1, 2006, the Spanish government introduced a partial SFL (Law 28/2005),<sup>12</sup> which included regulations on the sale, supply, consumption and advertising of tobacco products. Smoking was banned in all indoor public and private workplaces with the exception of the hospitality sector, where partial restrictions were established depending on the size of the establishment, i.e., in bars or restaurants smaller than 100 m<sup>2</sup> the managers could decide whether to allow smoking in the premises (Law 28/2005). The mean concentration of nicotine subsequently decreased by 60% in public administration offices and by 97.4% in private workplaces, but in areas where smoking was permitted, including bars and nightclubs, no changes were found.<sup>13-15</sup> This prompted the enactment of a comprehensive SFL (Law 42/2010),<sup>16</sup> which came into force in January 2011. This comprehensive law expanded smoking restriction to all hospitality venues of any size and, as a result, smoking was forbidden in all enclosed public places, including bars, restaurants and nightclubs, and in some open-air public places such as playgrounds.

Some studies have analysed the impact of these two Spanish laws on smoking prevalence. However, most have been based on health surveys<sup>13,17-20</sup> and surveys of hospitality workers.<sup>21,22</sup> Moreover, some studies evaluate only the partial law,<sup>13,17,18</sup> whereas others analyse the compound impact of both laws.<sup>19,20,23,24</sup> The results of these studies are often conflicting; while some conclude that the partial SFL does not have any effect on the downward trend in the prevalence of smokers,<sup>13,19,23</sup> other studies show a reduction in smoking prevalence<sup>24</sup>, an increase of the smoking quit-ratio in the short term<sup>18</sup> and minor increases in the prevalence of active smoking.<sup>20</sup>

Only one study conducted in primary health care (PHC) patients evaluates the impact of the Spanish partial SFL, including smoking prevalence in active smoker workers that attended PHC visits; one month after the implementation

1  
2  
3 of the law, a 9.5% decline of smokers was observed.<sup>25</sup> To our knowledge, no studies have been published on the impact  
4 of the Spanish comprehensive SFL in all adult PHC patients. In view of the pivotal role of PHC services in smoking habits,  
5 we consider that the information registered in PHC records is a good proxy to generate up-to-date evidence and to  
6 evaluate the impact of comprehensive SFL in the general population.  
7  
8  
9

10 We hypothesized that Law 42/2010 does not only reduce exposure to environmental cigarette smoke and its harmful  
11 effects but crucially, it promotes smoking denormalisation in society, thus encouraging smokers to quit or reduce  
12 consumption and discouraging non-smokers from initiating this habit. Accordingly, the aim of this study was to examine  
13 the impact of the Spanish comprehensive SFL (Law 42/2010) on the prevalence and incidence of adult smoking in PHC  
14 patients in three regions (Catalonia, Navarre and Balearic Islands), during the 2008-2013 period, overall and stratified  
15 by sex.  
16  
17  
18  
19

## 20 **METHODS**

### 21 **Design, study participants and information source**

22 Longitudinal observational study of the adult population assigned to 66 Primary Health Care teams (PHCT) in three  
23 Spanish regions: Catalonia, Navarre and the Balearic Islands (22 PHCT per region). Inclusion criteria of the PHCT were: 1)  
24 computerization of electronic health records (EHR) by January 1, 2005 in Catalonia and Navarre, and 2008 in the  
25 Balearic Islands; and 2) agreement to participate in the study by over 80% health-care professionals working in each  
26 PHCT. Random cluster sampling was stratified by region, with the PHCT as randomization unit.<sup>26</sup> In each PHCT, General  
27 Practitioners (GP) with a patient list between 400 and 3000 were selected. GP with shorter patient lists were accepted  
28 if it was their first year in the PHCT.  
29  
30  
31  
32  
33

34 The study period included from the first quarter of 2008 to the fourth quarter of 2013 in Catalonia and Navarre; and  
35 from the second quarter of 2010 to the fourth quarter of 2013 in the Balearic Islands. The study started in 2008 to  
36 obtain data from the 2 years prior analysis, a requirement to adequately construct the variable ex-smoker. In the case  
37 of the Balearic Islands, the study started later to ensure reliability of data.  
38  
39  
40

41 Inclusion criteria for patients were: 1) Population allocated to the selected PHCT for the whole 2007-2013 period in  
42 Catalonia and Navarre; in the Balearic Islands, patients allocated to the selected PHCT in 2013 and evaluated  
43 retrospectively (no historical annual comprehensive register of allocation of patients was available). 2) Age  $\geq 16$  and  
44  $\leq 100$  years in 2007 in Catalonia and Navarre, and 2010 in the Balearic Islands. 3) In order to have data in the EHR  
45 collected during the study period, a minimum of one visit to their PHCT during the 2007-2013 period in Catalonia and  
46 Navarre and 2010-2013 in the Balearic Islands; and 4) Information on smoking habit recorded in the EHR for the quarter  
47 prior to the onset of the study: last quarter of 2007 in Catalonia and Navarre and first quarter of 2010 in the Balearic  
48 Islands, to enable the adequate construction of the various variables. Thus, closed cohorts (with fixed membership,  
49 where nobody is added nor excluded after the study begins) were constituted in the three regions. Figure 1 shows the  
50 flowchart of the study.  
51  
52  
53  
54  
55  
56  
57  
58  
59  
60

1  
2  
3 Data were retrieved from the REGIPREV database,<sup>25</sup> which contains encrypted and anonymized clinical information  
4 recorded in the EHR by these 66 PHCT. An algorithm was applied to extract equivalent data from the health records  
5 software used in each region: “ECAP” in Catalonia, “Atenea” in Navarre and “e-siap” in the Balearic Islands. Codes of  
6 the International Classification of Diseases, 9th revision in the Balearic Islands (ICD-9) and 10th in Catalonia (ICD 10<sup>th</sup>  
7 revision)<sup>27</sup> and the International Classification of Primary Care, Second edition, in Navarre (ICPC-2)<sup>28</sup> were used.  
8  
9

### 10 11 **Variables**

12 The dependent variables originate from clinical variables (number of cigarettes per day, history of smoking, history of  
13 advice for smoking cessation) and from diagnostic codes to classify diseases (codes F17.0 to F17.9 and Z72.0 of the ICD-  
14 10, 305.1 of the ICD-9 and P17 of the ICPC-2) recorded in the EHR. We created the following variables at the end of  
15 each quarter of the study period:  
16

- 17 - Smoking status (three categories): 1) non-smoker: patient that has never been a tobacco consumer, 2) smoker:  
18 tobacco consumer or patient that has quit smoking for less than 12 months; and 3) ex-smoker: patient who used to  
19 smoke but has quit smoking for at least 12 continuous months. If the EHR did not contain a new entry related to  
20 the smoking status, we assumed that no changes had taken place and thus the last observation was carried  
21 forward.  
22
- 23 - New smoker: patient non-smoker for the 12 months prior to the considered quarter that has started smoking  
24 during said quarter.  
25
- 26 - New ex-smoker: the patient was a smoker two years before the considered quarter and has continuously abstained  
27 from tobacco for at least 12 months.  
28
- 29 - Ex-smoker relapse: patient ex-smoker during the 12 months prior to the considered quarter that has started  
30 smoking again during said quarter.  
31

32 For higher accuracy in prevalence and incidence changes, quarterly estimates were calculated.  
33  
34

35 The following variables of each patient were collected at baseline (2008 in Catalonia and Navarre; 2010 in the Balearic  
36 Islands): age, sex (male/female), annual number of health problems and annual number of PHC visits. The number of  
37 health problems was used as a morbidity indicator; it was calculated as the sum of the number of different active  
38 health problems (chronic and acute, coded by ICPC-2).  
39  
40  
41  
42

### 43 **Data analyses**

44 Descriptive statistics were used to summarize overall information. Categorical variables were expressed as percentage,  
45 and continuous variables as mean (standard deviation) or median (interquartile range [IQR]).  
46  
47

48 Because the three regions used different EHR systems (different standards and computer programs), different  
49 complementary measures to the SFL and also due to the shorter study period in the Balearic Islands, we performed a  
50 stratified analysis per region, overall and by sex. Age-standardized prevalence (non-smokers, smokers and ex-smokers)  
51 and incidence (new smokers, new ex-smokers and ex-smoker relapse) rates were calculated for each quarter using the  
52 direct method, and based on the European Standard Population (rates per 10,000 inhabitants).  
53  
54  
55  
56  
57  
58  
59

Joinpoint analysis was used to analyse the trends of age-standardized prevalence (smokers and ex-smokers) and incidence rates (new smokers, new ex-smokers and ex-smoker relapse) and to identify the best-fitting points (the 'joinpoints', in calendar quarters) where the rate changes significantly in the linear slope of the temporal trend. Significant changes include changes in direction or in the rate of increase or decrease<sup>29</sup>. Joinpoint analysis estimates the magnitude of the increase or the decrease observed in each specified time interval by estimating the annual percentage change (APC). In addition, temporal trends were expressed as the average annual percent change (AAPC), computed to summarize and compare these trends over the entire time period. Ninety-five percent confidence intervals (95% CI) of APC and AAPC were calculated.

Analyses were performed using Stata/SE version 14.2 for Windows (Stata Corp. LP, College Station, Texas, US). The joinpoint regression analysis was carried out using the joinpoint software from the Surveillance Research Program of the US National Cancer Institute [ref. Joinpoint Regression Program, Version 4.3.1. April, 2016; Statistical Research and Applications Branch, National Cancer Institute] (National Cancer Institute. Statistical Research and Applications Branch) [On-line: <https://surveillance.cancer.gov/branches/srab/>].

## RESULTS

The study population was 392,966 patients: 141,071 in Catalonia, 73,644 in Navarre and 178,251 in the Balearic Islands (Figure 1). At the onset of the study, the mean age was 50.4 years in Catalonia, 54.0 in Navarre and 47.7 in the Balearic Islands. In the three cohorts more than half were women (>51 %). Catalonia presented the highest median number of visits (9, IQR: 3 -16) and the Balearic Islands presented the highest number of recorded active health problems per patient (median 10, IQR: 6-16) (Table 1).

**Table 1: Characteristics of the cohort study population by region at the onset of the study (2008 in Catalonia and Navarre, 2010 in the Balearic Islands).**

|                                                    | Catalonia<br>N =141,071             | Navarre<br>N = 73,644             | Balearic Islands<br>N =178,251      |
|----------------------------------------------------|-------------------------------------|-----------------------------------|-------------------------------------|
| Age (years), SD                                    | 50.37 (17.23)                       | 54.04 (18.26)                     | 47.65 (17.56)                       |
| Sex (female), number (%)                           | 72340 (51.28)                       | 37898 (51.46)                     | 94164 (52.83)                       |
| Number of visits, mean (SD); median (IQR)          | 11.69 (12.19);<br>9.00 (3.00-16.00) | 8.93 (9.30);<br>7.00 (3.00-12.00) | 11.01 (13.25);<br>7.00 (3.00-15.00) |
| Number of health problems, mean (SD); median (IQR) | 6.23 (4.58);<br>5.00 (3.00-8.00)    | 9.95 (5.39);<br>9.00 (6.00-13.00) | 11.85 (7.74);<br>10.00 (6.00-16.00) |

Abbreviations: SD, standard deviation; IQR, interquartile range.

Patients belonged to 22 Primary Health Care Teams in each region.

The **overall standardized smoker prevalence rates** were of similar magnitude in the three regions (ranges of 3579.2 - 4138.9 in Catalonia; 3719.8 - 4034.2 in Navarre; and 3787.4 - 4029.7 in the Balearic Islands). The prevalence rate

1  
2  
3 decreased in Navarre during the whole study period, decreased in the Balearic Islands in most quarters, and also in  
4 Catalonia except for the last year. These rates were higher for men than for women in all regions (Supplementary File  
5 Tables S1-S6). A significant downward **overall trend of smoker prevalence rates** was found in Catalonia (AAPC=- 2.02),  
6 Navarre (AAPC= -1.40) and the Balearic Islands (AAPC= -1.75); this downward trend was higher for men than for women  
7 in the three regions. In Catalonia, the most significant reduction occurred during the period 2010.3-2011.2 (APC= -8,77),  
8 similarly to the Balearic Islands (2010.2-2012.4; APC= -2.11), whereas in Navarre it occurred between 2008.1-2011.3  
9 (APC= -1.69) (Tables 2, 3, 4, Supplementary File Figure S1).

10  
11  
12  
13  
14 For the whole period, the **overall standardized ex-smoker prevalence rates** increased in Navarre, in the Balearic Islands  
15 and in Catalonia except for the last year. The rates in Catalonia were higher (ranges of: 1168.5 - 1781.2 in Catalonia;  
16 313.3 - 764.1 in Navarre; and 559.3 - 914.1 in the Balearic Islands). The standardized ex-smoker prevalence rates were  
17 higher for men than for women in all regions (Supplementary File Tables S1-S6). The **overall trend of ex-smoker**  
18 **prevalence rates** increased significantly in the three regions throughout the study period but was higher in Navarre  
19 (Navarre AAPC= 16.67; Catalonia AAPC= 7.18; Balearic Islands AAPC= 14.92). The increase in the prevalence rate of ex-  
20 smokers was higher for the 2008.1-2008.3 period in Catalonia and Navarre, and for 2010.2-2012.2 in the Balearic  
21 Islands, and higher in women in the three regions (women: Catalonia AAPC= 10.83; Navarre AAPC=17.37 and Balearic  
22 Islands AAPC= 19.20) (Tables 2, 3, 4, Supplementary File Figure S1).

23  
24  
25  
26  
27  
28 The **overall new smoker standardized incidence rates** showed low values in the three regions (ranges of 7.9 - 26.8 in  
29 Catalonia; 9.5 - 30.9 in Navarre; 1.6 - 17.5 in the Balearic Islands) and higher for men than for women in Catalonia and  
30 Navarre (Supplementary File Tables S1-S6). The **overall trend of new smoker incidence rates** decreased significantly in  
31 Catalonia (AAPC= -10.65) and Navarre (AAPC= -9.44); additionally, the decline was similar for men and women. In  
32 contrast, the trend remained stable in the Balearic Islands (Tables 2, 3, 4, Supplementary File Figure S2).

33  
34  
35  
36  
37 The **overall standardized new ex-smoker incidence rates** showed higher values in Catalonia (range: 110.7 - 317.6) than  
38 in Navarre (range: 48.6 - 181.0) and the Balearic Islands (range: 93.7 - 188.1) (Supplementary File Tables S1-S6). The  
39 **overall trend of new ex-smoker incidence rates** showed a significant decrease in Catalonia (AAPC= -7.37) and especially  
40 in the Balearic Islands (AAPC= -11.72). This downward trend was higher for men than for women in Catalonia and the  
41 Balearic Islands (Tables 2, 3, 4, Supplementary File Figure S2).

42  
43  
44  
45  
46 The **overall standardized ex-smoker relapse incidence rates** presented higher values in the Balearic Islands (range:  
47 103.9 - 576.6) than in Catalonia (range: 70.7 - 334.5) and Navarre (range: 58.6 - 230.3) (Supplementary File Tables S1-  
48 S6). The **overall trend of ex-smoker relapse incidence rates** showed significant increases in Catalonia (AAPC= 18.91),  
49 particularly in women (AAPC= 14.99). In contrast, Navarre showed significant decreases (AAPC= -11.37) (Tables 2, 3, 4,  
50 Supplementary File Figure S2).

**Table 2. Trends in prevalence of smoking status and incidence of new smokers, ex-smokers and ex-smoker relapse. Jointpoints overall and by sex in CATALONIA. N=141,071 (2008-2013)**

|                                     | Trend 1         |                                      | Trend 2         |                                      | Trend 3         |                                     | Trend 4         |                                      | Trend 5         |                                     | AAPC (95% IC)<br>2008.1 - 2013.4     |
|-------------------------------------|-----------------|--------------------------------------|-----------------|--------------------------------------|-----------------|-------------------------------------|-----------------|--------------------------------------|-----------------|-------------------------------------|--------------------------------------|
|                                     | Time            | APC (95% IC)                         | Time            | APC (95% IC)                         | Time            | APC(95% IC)                         | Time            | APC (95% IC)                         | Time            | APC (95% IC)                        |                                      |
| <b>Smoker prevalence</b>            |                 |                                      |                 |                                      |                 |                                     |                 |                                      |                 |                                     |                                      |
| F                                   | 2008.1 - 2010.3 | -0.48 <sup>d</sup> (-1.03 ; 0.08)    | 2010.3 - 2011.2 | -10.27 <sup>c</sup> (-17.96 ; -1.86) | 2011.2 - 2013.4 | -0.58 <sup>c</sup> (-1.11 ; -0.04)  |                 |                                      |                 |                                     | -1.86 <sup>a</sup> (-2.95 ; -0.75)   |
| M                                   | 2008.1 - 2010.3 | -1.96 <sup>a</sup> (-2.23 ; -1.70)   | 2010.3 - 2011.2 | -8.26 <sup>a</sup> (-12.11 ; -4.24)  | 2011.2 - 2012.4 | -3.01 <sup>a</sup> (-3.82 ; -2.18)  | 2012.4 - 2013.4 | 2.69 <sup>a</sup> (1.48 ; 3.91)      |                 |                                     | -2.30 <sup>a</sup> (-2.86 ; -1.73)   |
| G                                   | 2008.1 - 2010.3 | -1.33 <sup>a</sup> (-1.65 ; -1.00)   | 2010.3 - 2011.2 | -8.77 <sup>b</sup> (-13.46 ; -3.83)  | 2011.2 - 2011.4 | -2.30 <sup>a</sup> (-3.29 ; -1.29)  | 2012.4 - 2013.4 | 2.02 <sup>c</sup> (0.56 ; 3.50)      |                 |                                     | -2.02 <sup>a</sup> (-2.71 ; -1.32)   |
| <b>Ex-smoker prevalence</b>         |                 |                                      |                 |                                      |                 |                                     |                 |                                      |                 |                                     |                                      |
| F                                   | 2008.1 - 2008.4 | 17.32 <sup>a</sup> (13.34 ; 21.44)   | 2008.4 - 2011.2 | 11.23 <sup>a</sup> (10.59 ; 11.87)   | 2011.2 - 2012.1 | 15.78 <sup>a</sup> (8.71 ; 23.30)   | 2012.1 - 2013.1 | 9.61 <sup>a</sup> (6.34 ; 12.98)     | 2013.1 - 2013.4 | 0.52 <sup>d</sup> (-2.16 ; 3.28)    | 10.83 <sup>a</sup> (9.74 ; 11.94)    |
| M                                   | 2008.1 - 2008.3 | 14.77 <sup>c</sup> (3.01 ; 27.86)    | 2008.3 - 2011.1 | 5.48 <sup>a</sup> (4.55 ; 6.42)      | 2011.1 - 2012.4 | 7.54 <sup>a</sup> (5.93 ; 9.17)     | 2012.4 - 2013.4 | -4.85 <sup>a</sup> (-7.29 ; -2.34)   |                 |                                     | 4.99 <sup>a</sup> (3.86 ; 6.13)      |
| G                                   | 2008.1 - 2008.3 | 16.69 <sup>a</sup> (7.59 ; 26.57)    | 2008.3 - 2011.1 | 7.63 <sup>a</sup> (6.90 ; 8.37)      | 2011.1 - 2012.4 | 9.68 <sup>a</sup> (8.40 ; 10.96)    | 2012.4 - 2013.4 | -2.35 <sup>c</sup> (-4.31 ; -0.35)   |                 |                                     | 7.18 <sup>a</sup> (6.31 ; 8.07)      |
| <b>New smokers incidence</b>        |                 |                                      |                 |                                      |                 |                                     |                 |                                      |                 |                                     |                                      |
| F                                   | 2008.1 - 2013.4 | -11.00 <sup>b</sup> (-17.19 ; -4.35) |                 |                                      |                 |                                     |                 |                                      |                 |                                     | -11.00 <sup>b</sup> (-17.19 ; -4.35) |
| M                                   | 2008.1 - 2013.4 | -10.68 <sup>a</sup> (-15.90 ; -5.14) |                 |                                      |                 |                                     |                 |                                      |                 |                                     | -10.68 <sup>a</sup> (-15.90 ; -5.14) |
| G                                   | 2008.1 - 2013.4 | -10.65 <sup>a</sup> (-15.45 ; 5.59)  |                 |                                      |                 |                                     |                 |                                      |                 |                                     | -10.65 <sup>a</sup> (-15.45 ; 5.59)  |
| <b>New ex-smokers incidence</b>     |                 |                                      |                 |                                      |                 |                                     |                 |                                      |                 |                                     |                                      |
| F                                   | 2008.1 - 2013.4 | -5.17 <sup>d</sup> (-10.33 ; 0.29)   |                 |                                      |                 |                                     |                 |                                      |                 |                                     | -5.17 <sup>d</sup> (-10.33 ; 0.29)   |
| M                                   | 2008.1 - 2013.4 | -7.89 <sup>b</sup> (-13.23 ; -2.22)  |                 |                                      |                 |                                     |                 |                                      |                 |                                     | -7.89 <sup>b</sup> (-13.23 ; -2.22)  |
| G                                   | 2008.1 - 2013.4 | -7.37 <sup>b</sup> (-12.47 ; -1.96)  |                 |                                      |                 |                                     |                 |                                      |                 |                                     | -7.37 <sup>b</sup> (-12.47 ; -1.96)  |
| <b>Ex-smokers relapse incidence</b> |                 |                                      |                 |                                      |                 |                                     |                 |                                      |                 |                                     |                                      |
| F                                   | 2008.1 - 2012.3 | -8.62 <sup>d</sup> (-18.97 ; 3.05)   | 2012.3 - 2013.4 | 163.01 <sup>a</sup> (60.46 ; 331.10) |                 |                                     |                 |                                      |                 |                                     | 14.99 <sup>c</sup> (0.62 ; 31.41)    |
| M                                   | 2008.1 - 2009.3 | -47.87 <sup>d</sup> (-82.66 ; 56.76) | 2009.3 - 2010.2 | 118.99 <sup>d</sup> (-100 ; 1329577) | 2010.2 - 2012.3 | -27.30 <sup>d</sup> (-49.13 ; 3.88) | 2012.3 - 2013.2 | 527.0 <sup>d</sup> (-75.9 ; 16209.4) | 2013.2 - 2013.4 | 74.88 <sup>d</sup> (-70.67 ; 942.8) | 10.03 <sup>d</sup> (-62.75 ; 225.05) |
| G                                   | 2008.1 - 2012.3 | -7.94 <sup>d</sup> (-16.33 ; 1.30)   | 2012.3 - 2013.4 | 198.72 <sup>a</sup> (116.0 ; 313.1)  |                 |                                     |                 |                                      |                 |                                     | 18.91 <sup>a</sup> (8.01 ; 30.90)    |

Note: 2008.\*. represents the trimester \* of the year 2008

APC, annual percentage change and AAPC, average annual percent change estimated by joinpoint regression analysis; CI, confidence interval; F, female; G, global; M, male.

<sup>a</sup> p ≤ 0.001; <sup>b</sup> p ≤ 0.01; <sup>c</sup> p ≤ 0.05; <sup>d</sup> p > 0.05



**Table 3. Trends in prevalence of smoking status and incidence of new smokers, ex-smokers and ex-smoker relapse. Jointpoints overall and by sex in NAVARRE. N=73,644 (2008-2013)**

|                                    | Trend 1         |                                      | Trend 2         |                                    | Trend 3         |                                    | Trend 4         |                                   | Trend 5         |                                   | AAPC (95% CI)<br>2008.1 - 2013.4     |
|------------------------------------|-----------------|--------------------------------------|-----------------|------------------------------------|-----------------|------------------------------------|-----------------|-----------------------------------|-----------------|-----------------------------------|--------------------------------------|
|                                    | Time            | APC (95% IC)                         | Time            | APC (95% IC)                       | Time            | APC (95% IC)                       | Time            | APC (95% IC)                      | Time            | APC (95% IC)                      |                                      |
| <b>Smoker prevalence</b>           |                 |                                      |                 |                                    |                 |                                    |                 |                                   |                 |                                   |                                      |
| F                                  | 2008.1 - 2010.3 | -0.95 <sup>a</sup> (-1.23 ; -0.67)   | 2010.3 - 2011.2 | -2.39 <sup>d</sup> (-6.56 ; 1.96)  | 2011.2 - 2013.4 | -0.22 <sup>d</sup> (-0.51 ; 0.08)  |                 |                                   |                 |                                   | -0.82 <sup>b</sup> (-1.36 ; -0.28)   |
| M                                  | 2008.1 - 2013.4 | -1.95 <sup>a</sup> (-2.06 ; -1.84)   |                 |                                    |                 |                                    |                 |                                   |                 |                                   | -1.95 <sup>a</sup> (-2.06 ; -1.84)   |
| G                                  | 2008.1 - 2011.3 | -1.69 <sup>a</sup> (-1.90 ; -1.48)   | 2011.3 - 2013.4 | -0.95 <sup>a</sup> (-1.39 ; -0.52) |                 |                                    |                 |                                   |                 |                                   | -1.40 <sup>a</sup> (-1.60 ; -1.20)   |
| <b>Ex-smoker prevalence</b>        |                 |                                      |                 |                                    |                 |                                    |                 |                                   |                 |                                   |                                      |
| F                                  | 2008.1 - 2008.3 | 41.34 <sup>a</sup> (25.34 ; 59.38)   | 2008.3 - 2010.2 | 19.33 <sup>a</sup> (17.20 ; 21.50) | 2010.2 - 2011.3 | 13.11 <sup>a</sup> (9.64 ; 16.70)  | 2011.3 - 2012.2 | 20.16 <sup>b</sup> (9.28 ; 32.12) | 2012.2 - 2013.4 | 10.28 <sup>a</sup> (8.87 ; 11.72) | 17.37 <sup>a</sup> (15.50 ; 19.26)   |
| M                                  | 2008.1 - 2008.3 | 34.19 <sup>a</sup> (16.08 ; 55.11)   | 2008.3 - 2009.4 | 19.48 <sup>a</sup> (14.38 ; 24.80) | 2009.4 - 2012.4 | 13.63 <sup>a</sup> (12.85 ; 14.41) | 2012.4 - 2013.4 | 9.63 <sup>a</sup> (6.53 ; 12.81)  |                 |                                   | 15.82 <sup>a</sup> (14.08 ; 17.60)   |
| G                                  | 2008.1 - 2008.3 | 36.52 <sup>a</sup> (17.15 ; 59.08)   | 2008.3 - 2009.4 | 20.06 <sup>a</sup> (14.63 ; 25.75) | 2009.4 - 2012.4 | 14.66 <sup>a</sup> (13.80 ; 15.52) | 2012.4 - 2013.4 | 9.66 <sup>a</sup> (6.27 ; 13.16)  |                 |                                   | 16.67 <sup>a</sup> (14.81 ; 18.57)   |
| <b>New smokers incidence</b>       |                 |                                      |                 |                                    |                 |                                    |                 |                                   |                 |                                   |                                      |
| F                                  | 2008.1 - 2013.4 | -9.43 <sup>b</sup> (-15.71 ; -2.68)  |                 |                                    |                 |                                    |                 |                                   |                 |                                   | -9.43 <sup>b</sup> (-15.71 ; -2.68)  |
| M                                  | 2008.1 - 2013.4 | -9.38 <sup>b</sup> (-15.04 ; -3.35)  |                 |                                    |                 |                                    |                 |                                   |                 |                                   | -9.38 <sup>b</sup> (-15.04 ; -3.35)  |
| G                                  | 2008.1 - 2013.4 | -9.44 <sup>b</sup> (-14.84 ; -3.68)  |                 |                                    |                 |                                    |                 |                                   |                 |                                   | -9.44 <sup>b</sup> (-14.84 ; -3.68)  |
| <b>New ex-smokers incidence</b>    |                 |                                      |                 |                                    |                 |                                    |                 |                                   |                 |                                   |                                      |
| F                                  | 2008.1 - 2013.4 | -9.66 <sup>b</sup> (-14.86 ; -4.14)  |                 |                                    |                 |                                    |                 |                                   |                 |                                   | -9.66 <sup>b</sup> (-14.86 ; -4.14)  |
| M                                  | 2008.1 - 2013.4 | -2.68 <sup>d</sup> (-9.12 ; 4.22)    |                 |                                    |                 |                                    |                 |                                   |                 |                                   | -2.68 <sup>d</sup> (-9.12 ; 4.22)    |
| G                                  | 2008.1 - 2013.4 | -5.00 <sup>d</sup> (-10.75 ; 1.11)   |                 |                                    |                 |                                    |                 |                                   |                 |                                   | -5.00 <sup>d</sup> (-10.75 ; 1.11)   |
| <b>Ex-smoker relapse incidence</b> |                 |                                      |                 |                                    |                 |                                    |                 |                                   |                 |                                   |                                      |
| F                                  | 2008.1 - 2013.4 | -13.88 <sup>a</sup> (-19.74 ; -7.61) |                 |                                    |                 |                                    |                 |                                   |                 |                                   | -13.88 <sup>a</sup> (-19.74 ; -7.61) |
| M                                  | 2008.1 - 2013.4 | -12.03 <sup>c</sup> (-20.16 ; -3.06) |                 |                                    |                 |                                    |                 |                                   |                 |                                   | -12.03 <sup>c</sup> (-20.16 ; -3.06) |
| G                                  | 2008.1 - 2013.4 | -11.37 <sup>a</sup> (-17.23 ; -5.09) |                 |                                    |                 |                                    |                 |                                   |                 |                                   | -11.37 <sup>a</sup> (-17.23 ; -5.09) |

Note: 2008.\*. represents the trimester \* of the year 2008

APC, annual percentage change and AAPC, average annual percent change estimated by joinpoint regression analysis; CI, confidence interval; F, female; G, global; M, male.

<sup>a</sup> p≤ 0.001; <sup>b</sup> p≤ 0.01; <sup>c</sup> p≤ 0.05; <sup>d</sup> p>0.05

**Table 4. Trends in prevalence of smoking status and incidence of new smokers, ex-smokers and ex-smoker relapse. Jointpoints overall and by sex in THE BALEARIC ISLANDS. N=178,251 (2010-2013)**

|                                     | Trend 1         |                                       | Trend 2         |                                       | Trend 3         |                                    | AAPC (95% IC)<br>2008.1 - 2013.4      |
|-------------------------------------|-----------------|---------------------------------------|-----------------|---------------------------------------|-----------------|------------------------------------|---------------------------------------|
|                                     | Time            | APC (95% IC)                          | Time            | APC (95% IC)                          | Time            | APC (95% IC)                       |                                       |
| <b>Smoker prevalence</b>            |                 |                                       |                 |                                       |                 |                                    |                                       |
| F                                   | 2010.2 - 2013.4 | -1.20 <sup>a</sup> (-1.40 ; -1.01)    |                 |                                       |                 |                                    | -1.20 <sup>a</sup> (-1.40 ; -1.01)    |
| M                                   | 2010.2 - 2011.1 | -2.11 <sup>a</sup> (-2.59 ; -1.63)    | 2011.1 - 2012.3 | -3.06 <sup>a</sup> (-3.29 ; -2.83)    | 2012.3 - 2013.4 | -1.48 <sup>a</sup> (-1.74 ; -1.22) | -2.29 <sup>a</sup> (-2.43 ; -2.15)    |
| G                                   | 2010.2 - 2012.4 | -2.11 <sup>a</sup> (-2.31 ; -1.91)    | 2012.4 - 2013.4 | -0.86 <sup>d</sup> (-1.87 ; 0.17)     |                 |                                    | -1.75 <sup>a</sup> (-2.04 ; -1.47)    |
| <b>Exsmoker prevalence</b>          |                 |                                       |                 |                                       |                 |                                    |                                       |
| F                                   | 2010.2 - 2012.2 | 24.88 <sup>a</sup> (24.10 ; 25.66)    | 2012.2 - 2013.4 | 12.03 <sup>a</sup> (11.11 ; 12.95)    |                 |                                    | 19.20 <sup>a</sup> (18.67 ; 19.72)    |
| M                                   | 2010.2 - 2012.2 | 15.87 <sup>a</sup> (14.59 ; 17.17)    | 2012.2 - 2013.4 | 7.28 <sup>a</sup> (5.69 ; 8.89)       |                 |                                    | 12.11 <sup>a</sup> (11.22 ; 13.00)    |
| G                                   | 2010.2 - 2012.2 | 19.35 <sup>a</sup> (18.76 ; 19.93)    | 2012.2 - 2013.4 | 9.27 <sup>a</sup> (8.56 ; 9.99)       |                 |                                    | 14.92 <sup>a</sup> (14.52 ; 15.32)    |
| <b>New smokers incidence</b>        |                 |                                       |                 |                                       |                 |                                    |                                       |
| F                                   | 2010.2 - 2012.4 | -44.30 <sup>b</sup> (-61.99 ; -18.40) | 2012.4 - 2013.4 | 1236.9 <sup>c</sup> (98.1 ; 8922.6)   |                 |                                    | 38.10 <sup>d</sup> (-19.25 ; 136.16)  |
| M                                   | 2010.2 - 2012.4 | -45.84 <sup>a</sup> (-59.81 ; -27.01) | 2012.4 - 2013.4 | 702.68 <sup>a</sup> (187.6 ; 2140.5)  |                 |                                    | 17.00 <sup>d</sup> (-14.94 ; 60.95)   |
| G                                   | 2010.2 - 2012.4 | -45.95 <sup>a</sup> (-60.61 ; -25.84) | 2012.4 - 2013.4 | 1036.5 <sup>b</sup> (207.5 ; 4098.1)  |                 |                                    | 29.03 <sup>d</sup> (-12.11 ; 89.42)   |
| <b>New exsmokers incidence</b>      |                 |                                       |                 |                                       |                 |                                    |                                       |
| F                                   | 2010.2 - 2013.4 | -11.19 <sup>c</sup> (-20.15 ; -1.22)  |                 |                                       |                 |                                    | -11.19 <sup>c</sup> (-20.15 ; -1.22)  |
| M                                   | 2010.2 - 2013.4 | -12.06 <sup>c</sup> (-18.59 ; -5.02)  |                 |                                       |                 |                                    | -12.06 <sup>c</sup> (-18.59 ; -5.02)  |
| G                                   | 2010.2 - 2013.4 | -11.72 <sup>b</sup> (-18.15 ; -4.78)  |                 |                                       |                 |                                    | -11.72 <sup>b</sup> (-18.15 ; -4.78)  |
| <b>Ex-smokers relapse incidence</b> |                 |                                       |                 |                                       |                 |                                    |                                       |
| F                                   | 2010.2 - 2013.1 | -32.20 <sup>a</sup> (-41.27 ; -21.73) |                 |                                       |                 |                                    | -32.20 <sup>a</sup> (-41.27 ; -21.73) |
| M                                   | 2010.2 - 2013.1 | -36.50 <sup>a</sup> (-44.95 ; -26.75) |                 |                                       |                 |                                    | -36.50 <sup>a</sup> (-44.95 ; -26.75) |
| G                                   | 2010.2 - 2013.1 | -18.41 <sup>c</sup> (-30.28 ; -4.52)  | 2013.1 - 2013.4 | -85.36 <sup>d</sup> (-99.52 ; 347.65) |                 |                                    | -43.54 <sup>d</sup> (-70.63 ; 8.57)   |

Note: 2010.\*. represents the quarter \* of the year 2010

APC, annual percentage change and AAPC, average annual percent change estimated by joinpoint regression analysis; CI, confidence interval; F, female; G, global; M, male.

<sup>a</sup> p≤ 0.001; <sup>b</sup> p≤ 0.01; <sup>c</sup> p≤ 0.05; <sup>d</sup> p>0.05

## DISCUSSION

The previous implementation of the partial Spanish SFL could account for the low effectiveness of the comprehensive SFL observed in this study. A significant downward trend of smoker prevalence rates, higher in men than in women, was found in the three regions throughout the study period. Correspondingly, the trend of ex-smoker prevalence rates increased in the three regions, particularly in Navarre and during the period 2008.1-2008.3 in Catalonia and Navarre, and the period 2010.2-2012.2 in the Balearic Islands. Even though the standardized ex-smoker prevalence rate was higher for men, the increase in the trend of ex-smoker prevalence rate was higher in women in the three regions. The overall trends of new smoker incidence rates decreased significantly in Catalonia and Navarre and were similar for men and women. Also, the overall trends of new ex-smokers decreased significantly in Catalonia and the Balearic Islands, particularly for men. In addition, the overall trends of ex-smoker relapse increased in Catalonia and decreased in Navarre, more for women than for men in both cases.

The trends of smoker prevalence declined throughout the study and no changes were observed after the implementation of the comprehensive SFL. Indeed, the most significant decrease begins in 2010 in Catalonia (3<sup>rd</sup> quarter) and the Balearic Islands and in 2008 in Navarre, prior to the implementation of the comprehensive SFL (January 1, 2011). However, the trend in Catalonia shows a drop in the prevalence rate of smokers around the time of the implementation of the Law. In contrast, trends in Navarre and the Balearic Islands show a more progressive decline. Comparisons are difficult due to the lack of studies on smoking prevalence and incidence from a PHC perspective and because some studies evaluate the impact of SFL on smoking prevalence with surveys that use different methodologies. Two studies that analysed data from surveys to the general population<sup>19,20</sup> did not find a significant decrease in the prevalence of smokers after the Spanish comprehensive law. In contrast, Lidon *et al.*<sup>24</sup> showed that after the implementation of both Spanish SFL, a significant decrease was observed in the smoking prevalence (from 34.5% to 26.1%, Prevalence Ratio = 0.76,  $p < 0.001$ ) of people 16 years of age and older living in Barcelona surveyed in 2004–2005 and followed-up in 2013–2014. In addition, National Health Survey data from the 1987-2005 period revealed an annual average absolute decline of 1.0% in the prevalence of male smokers, whereas women showed an annual average absolute increase in prevalence of 0.2%. Between 2006 and 2014, the prevalence of smokers declined annually by 0.7% in men and 0.5% in women.<sup>23</sup> Although the values of the current study are higher, the steeper decline in the prevalence of smokers in men agree with these data.<sup>23</sup> Also, one study that estimated the effect of the Spanish SFL for the 2012-2025 period predicted a decrease in smoking prevalence in all age groups and for both sexes, except for women aged 40–64.<sup>30</sup>

Concomitantly with the decline in the prevalence trends in smokers, a constant increase of prevalence trends in ex-smokers was observed in the three regions. Other studies failed to note a significant change in the prevalence of ex-smokers after the comprehensive SFL: a difference of only 0.3 % between 2007 and 2011<sup>20</sup> and a non-significant increase of 3.3% between 2006 and 2011.<sup>19</sup> In agreement with a recent evidence review,<sup>23</sup> we observed a higher increase in the trend of ex-smokers prevalence in women. This review showed that the rate of smoking cessation in men increased 0.9% annually during the 1987-2014 period, and 1.5% in women after the Partial SFL came into force. The later incorporation of women to smoking might explain these gender differences.

1  
2  
3  
4 We observed a gradual decline in the new smoker incidence trends in Catalonia and Navarre throughout the study  
5 period. A review by Wilson *et al.*<sup>31</sup> of two studies that evaluated smoking initiation reported mixed results, while  
6 Guerrero *et al.*<sup>32</sup> concluded that the Spanish partial SFL had no effect on new smokers in 2009. In contrast, Pinilla and  
7 Abásolo<sup>33</sup> observed a 6% decrease in the rate of smoking initiation among young people after the implementation of  
8 the same law, with a more positive impact in higher socioeconomic strata. We have not found studies that evaluate the  
9 impact of the comprehensive SFL on the incidence of new smokers. However, our data show a continuation in the trend  
10 observed in Pinilla's study<sup>33</sup> on the impact of the partial law.  
11  
12  
13

14  
15  
16 The incidence trend in new ex-smokers declined gradually throughout the study period in Catalonia and the Balearic  
17 Islands. While the literature to date lacks data on the effect of the SFL on the incidence of new ex-smokers, it provides  
18 some information on prevalence. In this respect, one study on the Spanish partial SFL observed an increase of 8%  
19 between 2006 and 2011 in the rate of cessation among adult smokers (age 21 years and older) according to data from  
20 the National Health Survey.<sup>33</sup> In Luxembourg, smoking cessation attributed to the SFL was higher among daily smokers  
21 with a higher socioeconomic status.<sup>8</sup> In our cohort, we observed apparent random increases and declines in the  
22 adjusted rates in the three regions throughout the study.  
23  
24  
25

26  
27 The incidence trend in ex-smoker relapses increased in Catalonia and declined in Navarre constantly throughout the  
28 whole period, particularly for women. However, the literature presents conflicting results regarding smoking relapse.  
29 One study on the partial Spanish SFL observed that most people who had succeeded in giving up smoking in 2006 had  
30 not relapsed by 2009.<sup>32</sup> On the other hand, a quasi-experimental study conducted in the United States observed that  
31 relapse was similar between employees in workplaces with SFL and employees where smoking was permitted.<sup>34</sup> In  
32 contrast, Shang found that a comprehensive SFL in bars significantly deters smoking relapse among people ages 21 and  
33 older.<sup>35</sup> According to Buczkowski *et al.*,<sup>36</sup> the main reasons for relapse are stress, missing the pleasure obtained from  
34 smoking and the smoking environment. Other factors not analysed in our study that might influence relapse rates could  
35 explain the variations between regions, for instance living with other smokers, being enrolled in work or clinics  
36 cessation programmes<sup>37</sup> or the region-specific complementary measures to the SFL (for instance, Foral Law 6/2003,<sup>38</sup>  
37 February 14, of smoking prevention, protection from secondhand tobacco smoke and promotion of health with regard  
38 to smoking in Navarre). In addition, we should consider the impact of the financial crisis during the study period and the  
39 subsequent increase of anxiety and depression in the population.<sup>39</sup> In this respect, Navarre was the region with the  
40 lowest unemployment rate in Spain according to the 2010 Economically Active Population Survey (unemployment of  
41 11.6% in Navarre, versus 18.0% in Catalonia and 22.2% in the Balearic Islands). According to the 2009 European Health  
42 Survey in Spain, these unemployment figures correlate with the prevalence of chronic depression, which was of 3.4% in  
43 Navarre versus 5.4% in Catalonia and 7.0% in the Balearic Islands.  
44  
45  
46  
47  
48  
49  
50  
51

52  
53 The SFL is a keystone of the WHO Framework Convention on Tobacco Control (FCTC) and the MPOWER policy package  
54 (M=Monitor; P=Protect; O=Offer; W=Warm; E=Enforce; R= Raise).<sup>40</sup> The enforcement of Laws 28/2005 and 42/2010  
55 have significantly advanced smoking control in Spain, in particular the "Protect people from tobacco" strategy.  
56  
57  
58  
59  
60

1  
2  
3 However, the remaining MPOWER strategies have been patchily implemented and require further development.<sup>23</sup> On  
4 balance, a combination of specific, feasible, pragmatic, sufficiently funded policies and interventions aimed at  
5 populations and individuals is essential to achieve progress regarding smoking behaviour.  
6  
7

### 8 **Limitations and strengths of the study**

9

10 It is important to take into account that other than the Law, the pattern of tobacco consumption is influenced by  
11 factors such as health interventions, level of education, age, civil status, having children and being unemployed.<sup>41</sup>  
12 However, this study only considered age, sex, number of health problems and number of PHC visits since other  
13 variables were not available. In addition, many patients were excluded from the study because of lack of baseline data  
14 on smoking (missing data is a common problem in studies based on EHR). In order to prevent bias caused by improved  
15 smoking records, we excluded the cases with no information at the beginning of the study. The selection criteria and  
16 the longitudinal design aimed to maximize the internal validity of the study. Moreover, young people might be  
17 underrepresented due to their lower use of PHC services. On the other hand, 70% of the population attends PHC  
18 services at least once a year and smokers attend more frequently than no smokers.<sup>42</sup> In view of the limited length of the  
19 study period, particularly in the Balearic Islands, we consider these results a first approximation to be succeeded by  
20 follow-up research. We should underscore that rather than just comparing two different periods, joinpoint analysis  
21 evaluates longitudinal trends, thus producing a more accurate assessment. While other statistical models could have  
22 been used, we believe that joinpoint is a suitable method to achieve the study objectives, as shown in previous  
23 studies.<sup>43-45</sup>  
24  
25  
26  
27  
28  
29  
30  
31

32 This study provides useful data on the impact of the Spanish comprehensive SFL on adult smoking behaviour in PHC  
33 patients. It is crucial to analyse the consequences of a public health law on PHC users. Primary health care has a pivotal  
34 role in smoking cessation because it is the gatekeeper of the health services, it is accessible and provides continuity of  
35 care to smokers.<sup>46</sup> We should also highlight that this study includes the evaluation of novel variables such as incidence  
36 of new smokers, new ex-smokers and ex-smoker relapse, which we consider of great relevance in relation to PHC  
37 interventions for smoking cessation. Used as a research tool, EHR portray real-life conditions and provide  
38 comprehensive, long-term health histories from a large population sample, ensure high representativeness and  
39 external validity and minimize potential recall bias. The results are only generalizable to PHC users. To our knowledge,  
40 this study is amongst the first to show quarterly data from EHR.  
41  
42  
43  
44  
45

### 46 **CONCLUSIONS**

47

48 The introduction of the Spanish comprehensive SFL (Law 42/2010) does not significantly modify incidence and  
49 prevalence trends of smoking behaviour in PHC adult patients in Catalonia, Navarre and the Balearic Islands. The impact  
50 of the comprehensive SFL might have been lessened by the effect of the previous implementation of the partial SFL  
51 (Law 28/2005). The current article provides baseline data for future research into the effectiveness of this Law. In  
52 addition to specific factors associated with smoking behaviour (such as the price of a pack of cigarettes or funding of  
53 smoking cessation services), future studies should consider socio-economic status and age groups.  
54  
55  
56  
57  
58  
59  
60

1  
2  
3  
4 **Acknowledgements:** We thank all professionals of the 66 PHC teams who volunteered to participate in the study. The  
5 authors would also like to thank Josep M Elorza-Ricart, Magdalena Rosell-Murphy, Lluís Martínez, Javier Baquedano,  
6 Javier Arranz, M<sup>a</sup> Ángeles Nuin and Carlos Martín-Cantera for their collaboration. Also Eulàlia Farré for the English  
7 translation. This article forms part of the doctoral dissertation of Yolanda Rando-Matos at the Universitat Autònoma de  
8 Barcelona.  
9  
10

11  
12 **Contributors:** BB, TRB, MPV, JBM, and CVF designed the study and wrote the protocol. YRM, MPV and JBM conducted  
13 literature searches and provided summaries of previous research studies. BB, JLL, JM, JR and MPV obtained the data.  
14 TRB and TLJ conducted the statistical analysis. All authors contributed to the interpretation of the results. YRM and  
15 MPV wrote the first draft of the manuscript. All authors read, contributed and approved the final version of the  
16 manuscript.  
17  
18  
19

20  
21 **Funding:** This project has been funded by the Carlos III Health Institute (Ministry of Economy and Competitiveness,  
22 Spain) with a grant for research projects on health (PI11/01413) through the Network for Prevention and Health  
23 Promotion in Primary Care (redIAPP, RD12/0005/0001; RD16/0007/0001), and by European Union ERDF funds. The  
24 funder had no role in the study design, collection, analysis or interpretation of the data, writing of the manuscript, or  
25 the decision to submit the paper for publication.  
26  
27  
28

29 **Competing interest:** The authors declare no conflict of interest.  
30  
31

32 **Ethical aspects:** This study follows the tenets of the Helsinki Declaration and of Good Clinical Research Practice and has  
33 been approved by the Ethical and Clinical Research Committee of the IDIAP Jordi Gol. Confidentiality was guaranteed  
34 through data encryption and anonymization in agreement with the data confidentiality Law 15/1999.  
35  
36  
37

38 **Data sharing statement:** No additional data are available.  
39  
40

41 **Figure 1: Flow-chart of patients included in the study, by region.**  
42  
43  
44  
45  
46  
47  
48  
49  
50  
51  
52  
53  
54  
55  
56  
57  
58  
59  
60

## REFERENCES

1. Jha P. Avoidable global cancer deaths and total deaths from smoking. *Nat Rev Cancer* 2009;9:655–64.
2. Murray CJL, Lopez AD. Alternative projections of mortality and disability by cause 1990–2020: Global Burden of Disease Study. *Lancet* 2017;349:1498–504.
3. World Health Organization, and Tobacco Free Initiative. Building blocks to tobacco control: a hand-book. (Tools for advancing tobacco control in the 21st century). Geneva: WHO; 2004.
4. Federico B, Mackenbach JP, Eikemo TA, *et al.* Impact of the 2005 smoke-free policy in Italy on prevalence, cessation and intensity of smoking in the overall population and by educational group. *Addiction* 2012;107:1677–86.
5. Hahn EJ, Rayens MK, Butler KM, *et al.* Smoke-free laws and adult smoking prevalence. *Prev Med* 2008;47:206–9.
6. Nagelhout GE, Willemsen MC, de Vries H. The population impact of smoke-free workplace and hospitality industry legislation on smoking behaviour. Findings from a national population survey. *Addiction* 2011;106:816–23.
7. Hublet A, Schmid H, Clays E, *et al.* Association between tobacco control policies and smoking behaviour among adolescents in 29 European countries. *Addiction* 2009;104:1918–26.
8. Tchicaya A, Lorentz N, Demarest S. Socioeconomic inequalities in smoking and smoking cessation due to a smoking ban: General population-based cross-sectional study in Luxembourg. *PLoS One* 2016;11:1–15.
9. Ye X, Chen S, Yao Z, *et al.* Smoking behaviors before and after implementation of a smoke-free legislation in Guangzhou, China. *BMC Public Health* 2015;15:982.
10. Fichtenberg CM, Glantz SA. Effect of smoke-free workplace on smoking behaviour: systematic review. *BMJ* 2002;325:188.
11. Frazer K, Callinan JE, McHugh J, *et al.* Legislative smoking bans for reducing harms from secondhand smoke exposure, smoking prevalence and tobacco consumption. *Cochrane database Syst Rev* 2016;2:CD005992.
12. Ley de medidas sanitarias frente al tabaquismo y reguladora de la venta, el suministro y la publicidad de los productos del tabaco. L. N. 28/2005 (27 diciembre 2005). Available at: <https://www.boe.es/buscar/doc.php?id=BOE-A-2005-21261> . Accessed 6-3-2017.
13. Nebot M, Fernández E, (Coords) Evaluación del impacto de la ley de medidas sanitarias frente al tabaquismo. Grupo de Trabajo en Tabaquismo de la Sociedad Española de Epidemiología. Barcelona: Sociedad Española de Epidemiología y Ministerio de Sanidad y Política Social, 9-43. 2009. Available in: URL: <http://www.seepidemiologia.es/documents/dummy/Monografia-Grupo%20Trabajo%20sobre%20tabaquismo.pdf>
14. Cordoba R, Villalbi JR, Salvador-Llivina T, *et al.* El proceso en España de la adopción de una legislación eficaz para la prevención del tabaquismo [Spain's process of passing effective smoking prevention legislation]. *Rev Esp Salud Publica* 2006;80:631–45.
15. Nebot M, López MJ, Ariza C, Pérez-Ríos M, *et al.* Impact of the Spanish smoking law on exposure to secondhand smoke in offices and hospitality venues: Before-and-after study. *Environ Health Perspect* 2009;117:344–7.
16. Ley de medidas sanitarias frente al tabaquismo y reguladora de la venta, el suministro y la publicidad de los productos del tabaco (30 December 2010), por la que se modifica la Ley 28/2005, de 26 de diciembre, de medidas sanitarias frente al tabaquismo y reguladora de la venta, el suministro, el consumo y la publicidad de los productos del tabaco. Boletín Oficial del Estado (Spanish Official State Bulletin). L. N. 42/2010.No. 318. Available at: <https://www.boe.es/buscar/act.php?id=BOE-A-2010-20138> . Accessed 6-3-2017.
17. Regidor E, de Mateo S, Ronda E, *et al.* Heterogeneous trend in smoking prevalence by sex and age group following the implementation of a national smoke-free law. *J Epidemiol Community Health* 2011;65:702–8.
18. Regidor E, Pascual C, Giráldez-García C, *et al.* Impact of tobacco prices and smoke-free policy on smoking cessation, by gender and educational group: Spain, 1993–2012. *Int J Drug Policy* 2015;26:1215–21.
19. Perez-Rios M, Fernandez E, Schiaffino A, *et al.* Changes in the prevalence of tobacco consumption and the profile of Spanish smokers after a comprehensive smoke-free policy. *PLoS One* 2015;10:1–9.
20. Jiménez Ruiz CA, Riesco Miranda JA, Altet Gómez N, *et al.* Impact of legislation on passive smoking in Spain. *Respiration* 2014;87:190–5.
21. Catalina Romero C, Gelpi Médez JA, Cortés Arcas MV, *et al.* Evolución en España del consumo de tabaco en población trabajadora desde la entrada en vigor de la Ley 28/2005 de medidas sanitarias frente al tabaquismo [Prevalence of Tobacco Consumption Among Working Population after the Law 42/2010, Spain]. *Rev Esp salud pública* 2010;84:223–7.
22. Catalina Romero C, Sainz Gutiérrez JC, Quevedo Aguado L, *et al.* Prevalencia de consumo de tabaco en población trabajadora tras la entrada en vigor de la Ley 42/2010 [Prevalence of tobacco consumption among working population after the law 42/2010, Spain]. *Rev Esp Salud Publica* 2012;86:177–88.
23. Pérez-Ríos M, Galán I(editors) Evaluación de las políticas de control del tabaquismo en España (Leyes 28/2005 y

- 42/2010) Revisión de la evidencia. Grupo de Trabajo en Tabaquismo de la Sociedad Española de Epidemiología. Barcelona: Sociedad Española de Epidemiología y Ministerio de Sanidad y Política Social, 2017;11-74. Available in: URL: <http://www.seepidemiologia.es/documents/dummy/V9.0%2520-%2520Libro%2520Tabaquismo%25202017%2520-%2520Abierto%2520Final.pdf>
24. Lidón-moyano C, Fu M, Ballbè M, *et al.* Addictive Behaviors Impact of the Spanish smoking laws on tobacco consumption and secondhand smoke exposure : A longitudinal population study. *Addict Behav* 2017;75:30–5.
  25. Bauzà-Amengual M, Blasco-González M, Sánchez-Vazquez E, *et al.* Impacto de la Ley del tabaco en el lugar de trabajo: estudio de seguimiento de una cohorte de trabajadores en España 2005–07 [Impact of the Tobacco Law on the workplace: a follow up study of a cohort of workers in Spain 2005–2007]. *Atención primaria* 2010;42:309–13.
  26. Bolívar B, Pareja C, Astier-Peña MP, *et al.* Variability in the performance of preventive services and in the degree of control of identified health problems: a primary care study protocol. *BMC Public Health* 2008;8:281.
  27. The International Statistical Classification of Diseases and Related Health Problems (ICD-10th revision) classification of mental and behavioural disorders: clinical descriptions and diagnostic guidelines. Geneva: World Health Organization, 1992. Available at: <http://www.who.int/classifications/icd/en/bluebook.pdf> . Accessed 6-3-2017..
  28. Okkes IM, Becker HW, Bernstein RM, *et al.* The March 2002 update of the electronic version of ICPC-2. A step forward to the use of ICD-10 as a nomenclature and a terminology for ICPC-2. *Fam Pract* 2002;19:543–6.
  29. Kim H-J, Fay MP, Feuer EJ, *et al.* Permutation tests for joinpoint regression with applications to cancer rates. *Stat Med* 2000;19:335–51. Available at: [http://onlinelibrary.wiley.com/doi/10.1002/\(SICI\)1097-0258\(20000215\)19:3%253335::AID-SIM336%253E3.0.CO;2-Z/abstract](http://onlinelibrary.wiley.com/doi/10.1002/(SICI)1097-0258(20000215)19:3%253335::AID-SIM336%253E3.0.CO;2-Z/abstract) . Accessed 8-3-2017.
  30. Martín-Sánchez JC, Martínez-Sánchez JM, Bilal U, *et al.* Sex and Age Specific Projections of Smoking Prevalence in Spain: A Bayesian Approach. *Nicotine Tob Res* 2017; ntx120, <https://doi.org/10.1093/ntr/ntx120>.
  31. Wilson LM, Avila Tang E, Chander G, *et al.* Impact of tobacco control interventions on smoking initiation, cessation, and prevalence: A systematic review. *J Environ Public Health* 2012; doi:10.1155/2012/961724
  32. Guerrero F, Santonja F-J, Villanueva R-J. Analysing the Spanish smoke-free legislation of 2006: a new method to quantify its impact using a dynamic model. *Int J Drug Policy* 2011 Jul;22:247–51.
  33. Pinilla J, Abásolo I. The effect of policies regulating tobacco consumption on smoking initiation and cessation in Spain: is it equal across socioeconomic groups? *Tob Induc Dis* 2017;15:8.
  34. Longo DR, Johnson JC, Kruse RL, *et al.* A prospective investigation of the impact of smoking bans on tobacco cessation and relapse. *Tob Control* 2001;10:267–72.
  35. Shang C. The effect of smoke-free air law in bars on smoking initiation and relapse among teenagers and young adults. *Int J Environ Res Public Health* 2015;12:504–20.
  36. Buczkowski K, Marciniowicz L, Czachowski S, *et al.* Motivations toward smoking cessation, reasons for relapse, and modes of quitting: results from a qualitative study among former and current smokers. *Patient Prefer Adherence* 2014;8:1353–63.
  37. Schillo BA, Keller PA, Betzner AE, *et al.* Minnesota’s smokefree policies: Impact on cessation program participants. *Am J Prev Med* 2012;43:S171–8.
  38. Ley foral 6/2003, de 14 de febrero, de prevención del consumo de tabaco, de protección del aire respirable y de la promoción de la salud en relación al tabaco (Navarra). Available at: <http://www.lexnavarra.navarra.es/detalle.asp?r=3323> . Accessed 31-7-2017
  39. Gili M, García Campayo J, Roca M. Crisis económica y salud mental. Informe SESPAS 2014 [Economic crisis and mental health. SESPAS report 2014]. *Gac Sanit* 2014;28 Suppl 1:104–8.
  40. World Health Organization. WHO report on the global tobacco epidemic, 2009: implementing smoke-free environments. Geneva: World Health Organization; 2009.
  41. Buonanno P, Ranzani M. Thank you for not smoking: Evidence from the Italian smoking ban. *Health Policy* 2013;109:192–9.
  42. Camarelles Guillem F, Dalmau González-Gallarza R, Clemente Jiménez L, *et al.* Documento de consenso para la atención clínica al tabaquismo en España [Consensus report for the clinical care of smoking cessation in Spain]. *Med Clin* 2013;140:272.e1-272.e12.
  43. Lopez-Campos JL, Ruiz-Ramos M, Fernandez E, *et al.* Recent lung cancer mortality trends in Europe: effect of national smoke-free legislation strengthening. *Eur J Cancer Prev*. 2017 Apr 4. doi: 10.1097/CEJ.0000000000000354.
  44. Jan C, Lee M, Roa R, *et al.* The association of tobacco control policies and the risk of acute myocardial infarction using hospital admissions data. *PLoS One*. 2014;9(2). doi: 10.1371/journal.pone.0088784
  45. Rando-Matos Y, Pons-Vigués M, Rodríguez-Blanco T, *et al.* Effect of comprehensive smoke-free legislation on asthma and coronary disease trends in Spanish primary care patients. *Eur J Public Health* [Internet].



1  
2  
3  
4  
5  
6  
7  
8  
9  
10  
11  
12  
13  
14  
15  
16  
17  
18  
19  
20  
21  
22  
23  
24  
25  
26  
27  
28  
29  
30  
31  
32  
33  
34  
35  
36  
37  
38  
39  
40  
41  
42  
43  
44  
45  
46  
47  
48  
49  
50  
51  
52  
53  
54  
55  
56  
57  
58  
59  
60

2018;cky010. doi: 10.1093/eurpub/cky010.  
46. Córdoba R, Cabezas C, Camaralles F, *et al.* Recomendaciones sobre el estilo de vida. *Atención primaria* 2012;44:16–22.

For peer review only

Figure 1: Flow-chart of patients included in the study, by region.

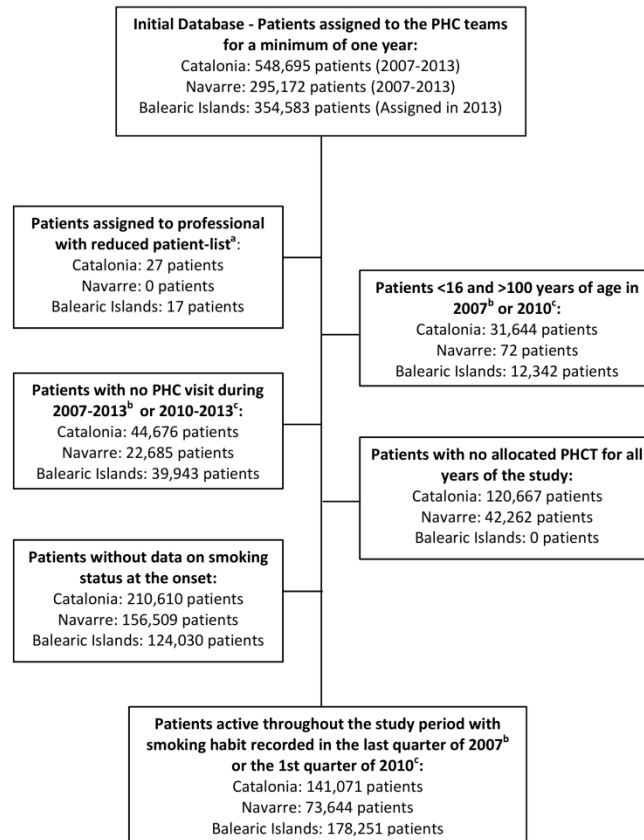

Patients belonged to 22 Primary Health Care Teams in each region  
<sup>a</sup> atypical patient-list <400 or >3000; GP with shorter patient lists were accepted if it was their first year in the Primary Health Care Team  
<sup>b</sup> In Catalonia or Navarre  
<sup>c</sup> In the Balearic Islands  
 PHC: Primary health care

Figure 1: Flow-chart of patients included in the study, by region.

209x297mm (300 x 300 DPI)

**SUPPLEMENTARY DATA FOR *Effect of the comprehensive smoke-free law on time trends in smoking behaviour in Primary Health Care patients in Spain: a longitudinal observational study***

**Table S1: Age-adjusted rates by direct method per 10,000 inhabitants based on the European Standard Population. CATALONIA N=141,071 (2008-2013).**

| Quarter | Smoking status prevalence |         |            | New smokers incidence | New ex-smokers incidence | Ex-smoker relapses incidence |
|---------|---------------------------|---------|------------|-----------------------|--------------------------|------------------------------|
|         | Non smokers               | Smokers | Ex-smokers |                       |                          |                              |
| 2008.1  | 4692.6                    | 4138.9  | 1168.5     | 20.8                  | 254.3                    | 226.9                        |
| 2008.2  | 4679.3                    | 4099.0  | 1221.7     | 21.4                  | 212.9                    | 151.4                        |
| 2008.3  | 4668.8                    | 4073.6  | 1257.6     | 16.6                  | 267.5                    | 218.5                        |
| 2008.4  | 4650.2                    | 4051.7  | 1298.1     | 26.1                  | 317.6                    | 100.4                        |
| 2009.1  | 4638.8                    | 4053.6  | 1307.6     | 25.2                  | 260.1                    | 128.6                        |
| 2009.2  | 4628.1                    | 4036.8  | 1335.1     | 15.8                  | 228.5                    | 78.3                         |
| 2009.3  | 4618.4                    | 4021.6  | 1360.0     | 12.7                  | 161.3                    | 113.7                        |
| 2009.4  | 4604.4                    | 3998.5  | 1397.2     | 19.6                  | 212.7                    | 165.6                        |
| 2010.1  | 4590.0                    | 4001.8  | 1408.2     | 19.0                  | 160.9                    | 123.1                        |
| 2010.2  | 4573.5                    | 3994.3  | 1432.2     | 26.4                  | 135.8                    | 148.8                        |
| 2010.3  | 4560.0                    | 3981.0  | 1459.0     | 20.8                  | 139.0                    | 100.5                        |
| 2010.4  | 4539.7                    | 3957.4  | 1503.0     | 26.8                  | 188.1                    | 112.5                        |
| 2011.1  | 4077.0                    | 3758.0  | 1510.3     | 15.1                  | 171.9                    | 103.2                        |
| 2011.2  | 4068.6                    | 3721.4  | 1555.3     | 12.4                  | 213.0                    | 90.0                         |
| 2011.3  | 4061.6                    | 3696.3  | 1587.3     | 13.0                  | 145.9                    | 81.4                         |
| 2011.4  | 4050.8                    | 3649.8  | 1644.7     | 15.8                  | 255.4                    | 91.3                         |
| 2012.1  | 4012.6                    | 3658.7  | 1673.9     | 13.4                  | 222.7                    | 111.1                        |
| 2012.2  | 4004.9                    | 3629.6  | 1710.7     | 11.3                  | 171.3                    | 91.9                         |
| 2012.3  | 4000.4                    | 3608.5  | 1736.3     | 7.9                   | 118.8                    | 70.7                         |
| 2012.4  | 3990.2                    | 3579.2  | 1775.8     | 11.8                  | 201.3                    | 103.9                        |
| 2013.1  | 3963.0                    | 3601.1  | 1781.2     | 16.5                  | 184.9                    | 141.7                        |
| 2013.2  | 3956.3                    | 3618.6  | 1770.3     | 15.2                  | 136.7                    | 247.6                        |
| 2013.3  | 3952.8                    | 3635.1  | 1757.3     | 9.3                   | 110.7                    | 248.6                        |
| 2013.4  | 3946.5                    | 3659.3  | 1739.5     | 14.7                  | 172.8                    | 334.5                        |

Note: 2008.\*. represents the quarter \* of the year 2008

Rates are per 10,000 inhabitants and age-standardized on the European Standard Population (direct method)

**Table S2: Age-adjusted rates by the direct method per 10,000 inhabitants based on the European Standard Population. NAVARRE N=73,644 (2008-2013).**

| Quarter | Smoking status prevalence |         |            | New smokers incidence | New ex-smokers incidence | Ex-smoker relapses incidence |
|---------|---------------------------|---------|------------|-----------------------|--------------------------|------------------------------|
|         | Non smokers               | Smokers | Ex-smokers |                       |                          |                              |
| 2008.1  | 5652.5                    | 4034.2  | 313.3      | 25.3                  | 175.3                    | 227.0                        |
| 2008.2  | 5642.5                    | 4013.0  | 344.5      | 17.2                  | 181.0                    | 160.4                        |
| 2008.3  | 5632.4                    | 4003.3  | 364.3      | 16.5                  | 109.1                    | 129.4                        |
| 2008.4  | 5620.0                    | 3993.3  | 386.7      | 21.4                  | 127.7                    | 230.3                        |
| 2009.1  | 5645.0                    | 3951.4  | 403.7      | 30.9                  | 136.4                    | 225.4                        |
| 2009.2  | 5630.8                    | 3944.1  | 425.1      | 23.5                  | 132.1                    | 174.0                        |
| 2009.3  | 5623.5                    | 3934.7  | 441.8      | 12.5                  | 100.3                    | 100.7                        |
| 2009.4  | 5614.7                    | 3925.5  | 459.8      | 14.8                  | 109.9                    | 134.7                        |
| 2010.1  | 5618.3                    | 3905.9  | 475.8      | 27.2                  | 111.2                    | 209.4                        |
| 2010.2  | 5605.5                    | 3893.8  | 500.7      | 21.1                  | 114.9                    | 132.5                        |
| 2010.3  | 5595.1                    | 3889.1  | 515.8      | 16.4                  | 82.2                     | 98.7                         |
| 2010.4  | 5581.9                    | 3885.3  | 532.8      | 21.4                  | 89.9                     | 81.2                         |
| 2011.1  | 4990.3                    | 3806.9  | 548.1      | 16.0                  | 136.8                    | 141.3                        |
| 2011.2  | 4979.2                    | 3795.8  | 570.2      | 20.3                  | 116.7                    | 113.8                        |
| 2011.3  | 4972.0                    | 3791.6  | 581.6      | 12.7                  | 48.6                     | 60.2                         |
| 2011.4  | 4964.3                    | 3780.5  | 600.4      | 13.8                  | 99.6                     | 118.6                        |
| 2012.1  | 4910.7                    | 3804.6  | 630.0      | 18.6                  | 127.3                    | 87.6                         |
| 2012.2  | 4902.9                    | 3781.3  | 661.1      | 13.7                  | 130.1                    | 108.4                        |
| 2012.3  | 4897.7                    | 3773.3  | 674.3      | 9.8                   | 75.2                     | 58.6                         |
| 2012.4  | 4888.9                    | 3760.5  | 695.8      | 15.2                  | 110.2                    | 96.0                         |
| 2013.1  | 4886.8                    | 3746.7  | 711.8      | 15.1                  | 121.0                    | 116.4                        |
| 2013.2  | 4876.8                    | 3733.2  | 735.2      | 16.9                  | 104.2                    | 97.4                         |
| 2013.3  | 4870.8                    | 3727.9  | 746.6      | 9.5                   | 60.7                     | 119.1                        |
| 2013.4  | 4861.3                    | 3719.8  | 764.1      | 16.9                  | 90.7                     | 97.8                         |

Note: 2008.\*. represents the quarter \* of the year 2008

Rates are per 10,000 inhabitants and age-standardized on the European Standard Population (direct method)

**Table S3: Age-adjusted rates by the direct method per 10,000 inhabitants based on the European Standard Population. THE BALEARIC ISLANDS N=178,251 (2010-2013).**

| Quarter | Smoking status prevalence |         |            | New smokers incidence | New ex-smokers incidence | Ex-smoker relapses incidence |
|---------|---------------------------|---------|------------|-----------------------|--------------------------|------------------------------|
|         | Non smokers               | Smokers | Ex-smokers |                       |                          |                              |
| 2010.2  | 5411.0                    | 4029.7  | 559.3      | 9.3                   | 158.5                    | 576.6                        |
| 2010.3  | 5406.4                    | 4007.3  | 586.2      | 9.0                   | 151.6                    | 527.0                        |
| 2010.4  | 5401.6                    | 3982.7  | 615.7      | 9.3                   | 158.7                    | 503.7                        |
| 2011.1  | 5374.9                    | 3987.9  | 637.1      | 6.6                   | 149.9                    | 545.7                        |
| 2011.2  | 5372.4                    | 3959.3  | 668.3      | 5.2                   | 170.9                    | 424.4                        |
| 2011.3  | 5369.7                    | 3929.5  | 700.8      | 5.2                   | 160.1                    | 383.9                        |
| 2011.4  | 5367.4                    | 3898.4  | 734.2      | 4.0                   | 169.8                    | 385.6                        |
| 2012.1  | 5345.3                    | 3888.3  | 766.4      | 4.3                   | 188.1                    | 351.8                        |
| 2012.2  | 5344.0                    | 3862.4  | 793.6      | 2.4                   | 137.0                    | 370.6                        |
| 2012.3  | 5342.5                    | 3841.0  | 816.6      | 2.9                   | 113.5                    | 372.6                        |
| 2012.4  | 5341.7                    | 3818.9  | 839.4      | 1.6                   | 133.0                    | 339.2                        |
| 2013.1  | 5324.1                    | 3825.3  | 850.7      | 2.1                   | 130.5                    | 480.5                        |
| 2013.2  | 5317.8                    | 3810.5  | 871.7      | 12.1                  | 106.7                    | 453.0                        |
| 2013.3  | 5308.3                    | 3800.6  | 891.1      | 17.5                  | 93.7                     | 103.9                        |
| 2013.4  | 5298.6                    | 3787.4  | 914.1      | 17.5                  | 116.8                    | 285.1                        |

Note: 2010.\*. represents the quarter \* of the year 2010

Rates are per 10,000 inhabitants and age-standardized on the European Standard Population (direct method)

**Table S4. Age-adjusted rates by the direct method for 10,000 inhabitants based on the European Standard Population in CATALONIA. N=72,340 (2008-2013).**

| Quarter | Smoking Status prevalence |        |         |        |            |        | New smokers incidence | New ex-smokers incidence | Ex-smoker relapse incidence |       |       |       |
|---------|---------------------------|--------|---------|--------|------------|--------|-----------------------|--------------------------|-----------------------------|-------|-------|-------|
|         | Non smokers               |        | Smokers |        | Ex-smokers |        |                       |                          |                             |       |       |       |
|         | Female                    | Male   | Female  | Male   | Female     | Male   |                       |                          |                             |       |       |       |
| 2008.1  | 5909.5                    | 3349.2 | 3411.5  | 4910.7 | 679.0      | 1740.1 | 16.6                  | 27.8                     | 246.7                       | 260.5 | 315.2 | 158.2 |
| 2008.2  | 5900.4                    | 3331.6 | 3385.4  | 4856.2 | 714.2      | 1812.2 | 14.3                  | 34.4                     | 266.5                       | 202.9 | 101.2 | 195.0 |
| 2008.3  | 5891.9                    | 3318.8 | 3368.4  | 4822.1 | 739.7      | 1859.1 | 14.0                  | 21.8                     | 275.0                       | 265.9 | 289.0 | 166.5 |
| 2008.4  | 5876.9                    | 3296.1 | 3356.2  | 4789.4 | 766.9      | 1914.5 | 24.0                  | 31.9                     | 254.1                       | 329.2 | 112.0 | 99.6  |
| 2009.1  | 5832.7                    | 3323.5 | 3379.8  | 4769.9 | 787.5      | 1906.6 | 27.8                  | 26.3                     | 289.2                       | 234.0 | 148.8 | 105.2 |
| 2009.2  | 5823.1                    | 3311.7 | 3366.5  | 4749.0 | 810.4      | 1939.3 | 13.7                  | 19.7                     | 182.0                       | 237.8 | 89.5  | 79.2  |
| 2009.3  | 5814.6                    | 3300.6 | 3356.2  | 4728.4 | 829.2      | 1971.1 | 11.9                  | 15.3                     | 154.4                       | 165.7 | 181.4 | 65.8  |
| 2009.4  | 5804.4                    | 3282.4 | 3335.4  | 4702.6 | 860.2      | 2015.0 | 14.3                  | 28.0                     | 243.3                       | 203.9 | 188.5 | 152.0 |
| 2010.1  | 5757.2                    | 3312.5 | 3359.5  | 4679.7 | 883.3      | 2007.8 | 14.0                  | 26.7                     | 201.5                       | 144.1 | 133.5 | 109.4 |
| 2010.2  | 5744.1                    | 3292.3 | 3355.5  | 4668.2 | 900.4      | 2039.6 | 24.1                  | 30.4                     | 146.6                       | 131.6 | 164.1 | 152.0 |
| 2010.3  | 5730.0                    | 3279.4 | 3345.8  | 4650.5 | 924.2      | 2070.2 | 20.7                  | 22.7                     | 156.1                       | 134.4 | 106.6 | 98.0  |
| 2010.4  | 5710.9                    | 3256.8 | 3332.3  | 4616.4 | 956.8      | 2126.8 | 30.9                  | 24.3                     | 205.4                       | 177.3 | 132.2 | 114.9 |
| 2011.1  | 5231.2                    | 2821.0 | 3138.8  | 4408.8 | 975.2      | 2115.4 | 15.0                  | 16.8                     | 181.1                       | 166.1 | 62.6  | 146.7 |
| 2011.2  | 5223.4                    | 2811.7 | 3115.8  | 4356.5 | 1006.0     | 2177.1 | 12.2                  | 14.3                     | 231.6                       | 203.8 | 118.9 | 65.4  |
| 2011.3  | 5216.7                    | 2804.3 | 3095.4  | 4326.8 | 1033.2     | 2214.1 | 12.4                  | 15.2                     | 166.4                       | 136.0 | 93.0  | 68.5  |
| 2011.4  | 5209.6                    | 2789.1 | 3057.6  | 4270.9 | 1078.0     | 2285.2 | 12.1                  | 21.2                     | 308.9                       | 241.6 | 111.0 | 78.8  |
| 2012.1  | 5142.2                    | 2792.0 | 3082.8  | 4259.8 | 1120.2     | 2293.5 | 9.3                   | 19.1                     | 251.1                       | 216.5 | 140.4 | 83.6  |
| 2012.2  | 5136.1                    | 2782.4 | 3059.1  | 4225.1 | 1150.0     | 2337.7 | 10.4                  | 12.4                     | 215.6                       | 162.3 | 107.4 | 75.8  |
| 2012.3  | 5132.0                    | 2777.7 | 3041.8  | 4200.0 | 1171.4     | 2367.6 | 8.7                   | 7.3                      | 135.6                       | 113.1 | 61.0  | 80.2  |
| 2012.4  | 5123.4                    | 2765.4 | 3020.5  | 4161.9 | 1201.3     | 2417.9 | 10.2                  | 16.2                     | 192.8                       | 203.5 | 128.5 | 89.1  |
| 2013.1  | 5063.9                    | 2781.5 | 3055.9  | 4167.2 | 1225.4     | 2396.5 | 15.4                  | 19.9                     | 213.2                       | 180.4 | 167.8 | 123.5 |
| 2013.2  | 5058.8                    | 2773.4 | 3057.2  | 4202.9 | 1229.3     | 2368.9 | 10.2                  | 21.9                     | 146.9                       | 131.3 | 216.4 | 251.9 |
| 2013.3  | 5055.0                    | 2770.2 | 3060.2  | 4234.1 | 1230.0     | 2340.9 | 9.0                   | 10.7                     | 127.0                       | 106.7 | 217.7 | 263.3 |
| 2013.4  | 5049.2                    | 2763.3 | 3063.6  | 4281.9 | 1232.5     | 2300.1 | 11.8                  | 21.1                     | 202.8                       | 159.2 | 325.6 | 315.6 |

Note: 2008.\*. represents the quarter \* of the year 2008

Rates are per 10,000 inhabitants and age-standardized on the European Standard Population (direct method)

**Table S5. Age-adjusted rates by the direct method per 10,000 inhabitants based on the European Standard Population in NAVARRE. N=37,898 (2008-2013).**

| Quarter | Smoking Status prevalence |        |         |        |            |       | New smokers incidence | New ex-smokers incidence | Ex-smoker relapse incidence |        |       |       |
|---------|---------------------------|--------|---------|--------|------------|-------|-----------------------|--------------------------|-----------------------------|--------|-------|-------|
|         | Non smokers               |        | Smokers |        | Ex-smokers |       |                       |                          |                             | Female | Male  |       |
|         | Female                    | Male   | Female  | Male   | Female     | Male  |                       |                          |                             | Female | Male  |       |
| 2008.1  | 6224.8                    | 5021.1 | 3542.5  | 4569.6 | 232.7      | 409.3 | 22.3                  | 31.0                     | 152.7                       | 172.3  | 164.4 | 295.8 |
| 2008.2  | 6215.3                    | 5010.6 | 3527.8  | 4539.7 | 256.9      | 449.7 | 15.2                  | 20.3                     | 168.7                       | 187.7  | 136.9 | 173.7 |
| 2008.3  | 6207.4                    | 4998.8 | 3518.5  | 4528.6 | 274.2      | 472.6 | 11.5                  | 22.1                     | 147.1                       | 97.1   | 147.9 | 123.7 |
| 2008.4  | 6198.6                    | 4982.4 | 3510.9  | 4515.4 | 290.4      | 502.2 | 14.8                  | 30.0                     | 157.9                       | 125.6  | 296.5 | 98.8  |
| 2009.1  | 6209.7                    | 5028.3 | 3485.7  | 4451.5 | 304.6      | 520.2 | 24.9                  | 39.7                     | 184.8                       | 111.3  | 254.0 | 197.0 |
| 2009.2  | 6197.8                    | 5011.6 | 3480.3  | 4441.1 | 321.9      | 547.3 | 17.4                  | 32.6                     | 177.2                       | 127.7  | 152.7 | 171.7 |
| 2009.3  | 6191.6                    | 5003.2 | 3475.5  | 4426.3 | 332.9      | 570.4 | 10.7                  | 15.2                     | 108.4                       | 98.3   | 73.4  | 111.5 |
| 2009.4  | 6186.2                    | 4990.0 | 3470.2  | 4413.1 | 343.6      | 596.9 | 8.4                   | 24.0                     | 97.2                        | 115.8  | 126.6 | 134.7 |
| 2010.1  | 6175.4                    | 5014.1 | 3464.6  | 4375.5 | 360.0      | 610.4 | 22.6                  | 33.5                     | 115.7                       | 112.9  | 224.3 | 208.6 |
| 2010.2  | 6164.6                    | 4999.4 | 3455.7  | 4359.8 | 379.7      | 640.8 | 16.4                  | 27.9                     | 119.1                       | 114.5  | 106.4 | 129.5 |
| 2010.3  | 6154.5                    | 4988.6 | 3456.0  | 4350.4 | 389.5      | 661.0 | 16.2                  | 17.0                     | 111.3                       | 75.9   | 88.3  | 94.5  |
| 2010.4  | 6142.1                    | 4974.6 | 3455.4  | 4343.4 | 402.5      | 682.1 | 17.8                  | 26.3                     | 126.9                       | 80.9   | 71.3  | 85.7  |
| 2011.1  | 5541.4                    | 4399.8 | 3388.4  | 4248.3 | 415.4      | 697.1 | 12.2                  | 21.0                     | 146.2                       | 135.4  | 91.3  | 183.2 |
| 2011.2  | 5532.4                    | 4386.6 | 3381.0  | 4233.7 | 431.9      | 724.9 | 15.5                  | 26.8                     | 151.1                       | 110.6  | 117.2 | 103.9 |
| 2011.3  | 5524.7                    | 4379.8 | 3377.8  | 4228.5 | 442.7      | 737.0 | 12.6                  | 13.7                     | 55.8                        | 44.9   | 61.6  | 54.1  |
| 2011.4  | 5518.9                    | 4370.0 | 3369.7  | 4213.6 | 456.6      | 761.7 | 9.6                   | 19.5                     | 118.2                       | 95.4   | 70.0  | 160.8 |
| 2012.1  | 5452.1                    | 4335.6 | 3408.9  | 4217.7 | 484.2      | 792.0 | 15.9                  | 22.5                     | 129.3                       | 126.5  | 106.9 | 65.3  |
| 2012.2  | 5445.6                    | 4326.1 | 3389.4  | 4190.1 | 510.2      | 829.0 | 11.7                  | 17.2                     | 125.1                       | 131.6  | 95.3  | 114.5 |
| 2012.3  | 5442.6                    | 4318.6 | 3385.2  | 4178.7 | 517.4      | 847.9 | 6.2                   | 14.2                     | 67.6                        | 78.0   | 68.6  | 41.2  |
| 2012.4  | 5434.5                    | 4308.9 | 3379.5  | 4159.1 | 531.2      | 877.2 | 12.5                  | 19.6                     | 130.7                       | 110.0  | 66.7  | 126.7 |
| 2013.1  | 5420.0                    | 4323.0 | 3380.9  | 4128.0 | 544.3      | 894.1 | 14.1                  | 16.4                     | 133.8                       | 124.7  | 68.6  | 157.5 |
| 2013.2  | 5413.7                    | 4309.1 | 3367.7  | 4114.5 | 563.9      | 921.6 | 10.1                  | 25.2                     | 103.2                       | 104.7  | 87.0  | 98.4  |
| 2013.3  | 5408.6                    | 4302.1 | 3363.6  | 4108.1 | 573.1      | 935.1 | 7.2                   | 12.7                     | 72.3                        | 57.3   | 152.7 | 85.9  |
| 2013.4  | 5399.9                    | 4291.6 | 3360.4  | 4094.8 | 584.9      | 958.8 | 13.9                  | 21.7                     | 65.6                        | 102.8  | 72.2  | 116.0 |

Note: 2008.\*. represents the quarter \* of the year 2008

Rates are per 10,000 inhabitants and age-standardized on the European Standard Population (direct method)

**Table S6. Age-adjusted rates by the direct method per 10,000 inhabitants based on the European Standard Population in THE BALEARIC ISLANDS. N= 94,164 (2010-2013).**

| Quarter | Smoking Status prevalence |        |         |        |            |        | New smokers incidence | New ex-smokers incidence | Ex-smoker relapse incidence |       |       |       |
|---------|---------------------------|--------|---------|--------|------------|--------|-----------------------|--------------------------|-----------------------------|-------|-------|-------|
|         | Non smokers               |        | Smokers |        | Ex-smokers |        |                       |                          |                             |       |       |       |
|         | Female                    | Male   | Female  | Male   | Female     | Male   |                       |                          |                             |       |       |       |
| 2010.2  | 6224.8                    | 4484.3 | 3412.3  | 4723.7 | 362.9      | 792.0  | 8.9                   | 9.9                      | 106.8                       | 169.6 | 631.1 | 560.7 |
| 2010.3  | 6220.5                    | 4479.3 | 3395.5  | 4695.0 | 384.0      | 825.7  | 8.2                   | 10.4                     | 149.6                       | 147.6 | 576.9 | 435.9 |
| 2010.4  | 6215.8                    | 4474.3 | 3376.3  | 4664.4 | 408.0      | 861.2  | 8.8                   | 10.1                     | 179.2                       | 150.7 | 484.7 | 571.5 |
| 2011.1  | 6171.2                    | 4472.1 | 3395.3  | 4651.7 | 433.5      | 876.2  | 6.7                   | 6.6                      | 141.1                       | 146.7 | 562.7 | 508.9 |
| 2011.2  | 6168.5                    | 4469.8 | 3375.7  | 4612.8 | 455.9      | 917.5  | 5.2                   | 5.4                      | 140.3                       | 173.8 | 446.1 | 426.0 |
| 2011.3  | 6165.8                    | 4467.0 | 3353.4  | 4574.6 | 480.8      | 958.4  | 4.9                   | 6.0                      | 162.5                       | 154.9 | 400.9 | 391.6 |
| 2011.4  | 6163.1                    | 4465.3 | 3330.1  | 4534.6 | 506.8      | 1000.1 | 4.6                   | 3.4                      | 149.3                       | 170.9 | 296.7 | 540.3 |
| 2012.1  | 6118.6                    | 4474.0 | 3337.9  | 4501.2 | 543.6      | 1024.8 | 3.7                   | 5.1                      | 179.2                       | 182.1 | 306.5 | 461.7 |
| 2012.2  | 6117.0                    | 4473.2 | 3318.1  | 4468.3 | 564.9      | 1058.5 | 2.8                   | 1.9                      | 109.0                       | 139.6 | 359.8 | 348.6 |
| 2012.3  | 6115.2                    | 4471.9 | 3302.0  | 4440.5 | 582.8      | 1087.7 | 3.1                   | 2.5                      | 103.4                       | 112.8 | 376.5 | 363.9 |
| 2012.4  | 6114.3                    | 4471.2 | 3285.7  | 4411.7 | 600.0      | 1117.0 | 1.7                   | 1.6                      | 122.7                       | 132.9 | 414.0 | 213.4 |
| 2013.1  | 6077.2                    | 4479.2 | 3302.2  | 4406.4 | 620.6      | 1114.4 | 0.9                   | 4.1                      | 137.9                       | 122.6 | 492.0 | 470.3 |
| 2013.2  | 6070.8                    | 4473.1 | 3291.1  | 4387.8 | 638.2      | 1139.1 | 11.9                  | 12.7                     | 91.0                        | 105.4 | 410.8 | 532.6 |
| 2013.3  | 6056.9                    | 4468.7 | 3287.9  | 4370.1 | 655.1      | 1161.2 | 23.4                  | 10.4                     | 94.4                        | 90.1  | 110.4 | 87.5  |
| 2013.4  | 6046.1                    | 4460.3 | 3280.8  | 4349.5 | 673.1      | 1190.2 | 18.2                  | 16.9                     | 100.0                       | 121.4 | 342.4 | 116.1 |

Note: 2010.\*. represents the quarter \* of the year 2010

Rates are per 10,000 inhabitants and age-standardized on the European Standard Population (direct method)



SUPPLEMENTARY DATA FOR Effect of the comprehensive smoke-free law on time trends in smoking behaviour in Primary Health Care patients in Spain: a longitudinal observational study

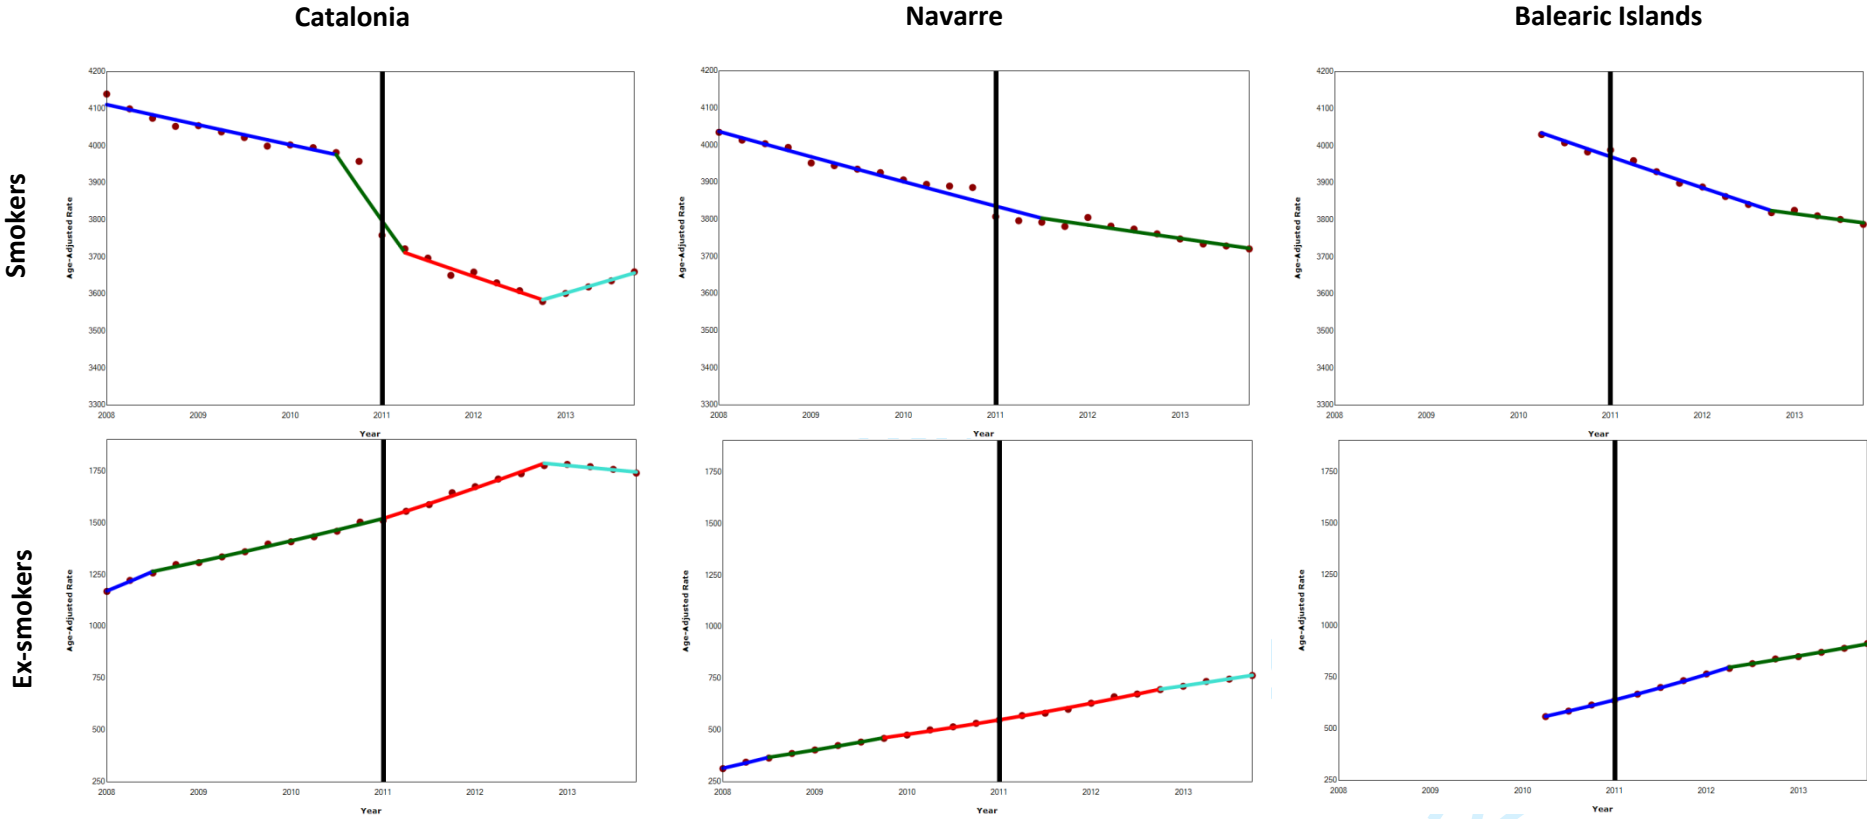

Figure S1: Overall trends of age-standardized prevalence rates of smoking status in Catalonia, Navarre and the Balearic Islands.

Solid lines represent the Joinpoint regression lines (each colour is a different trend); circle red points represent the age-adjusted prevalence rates. Black vertical lines represent the year when the Spanish comprehensive smoke-free law was introduced (2011).

1  
2  
3  
4  
5  
6  
7  
8  
9  
10  
11  
12  
13  
14  
15  
16  
17  
18  
19  
20  
21  
22  
23  
24  
25  
26  
27  
28  
29  
30  
31  
32  
33  
34  
35  
36  
37  
38  
39  
40  
41  
42  
43  
44  
45  
46

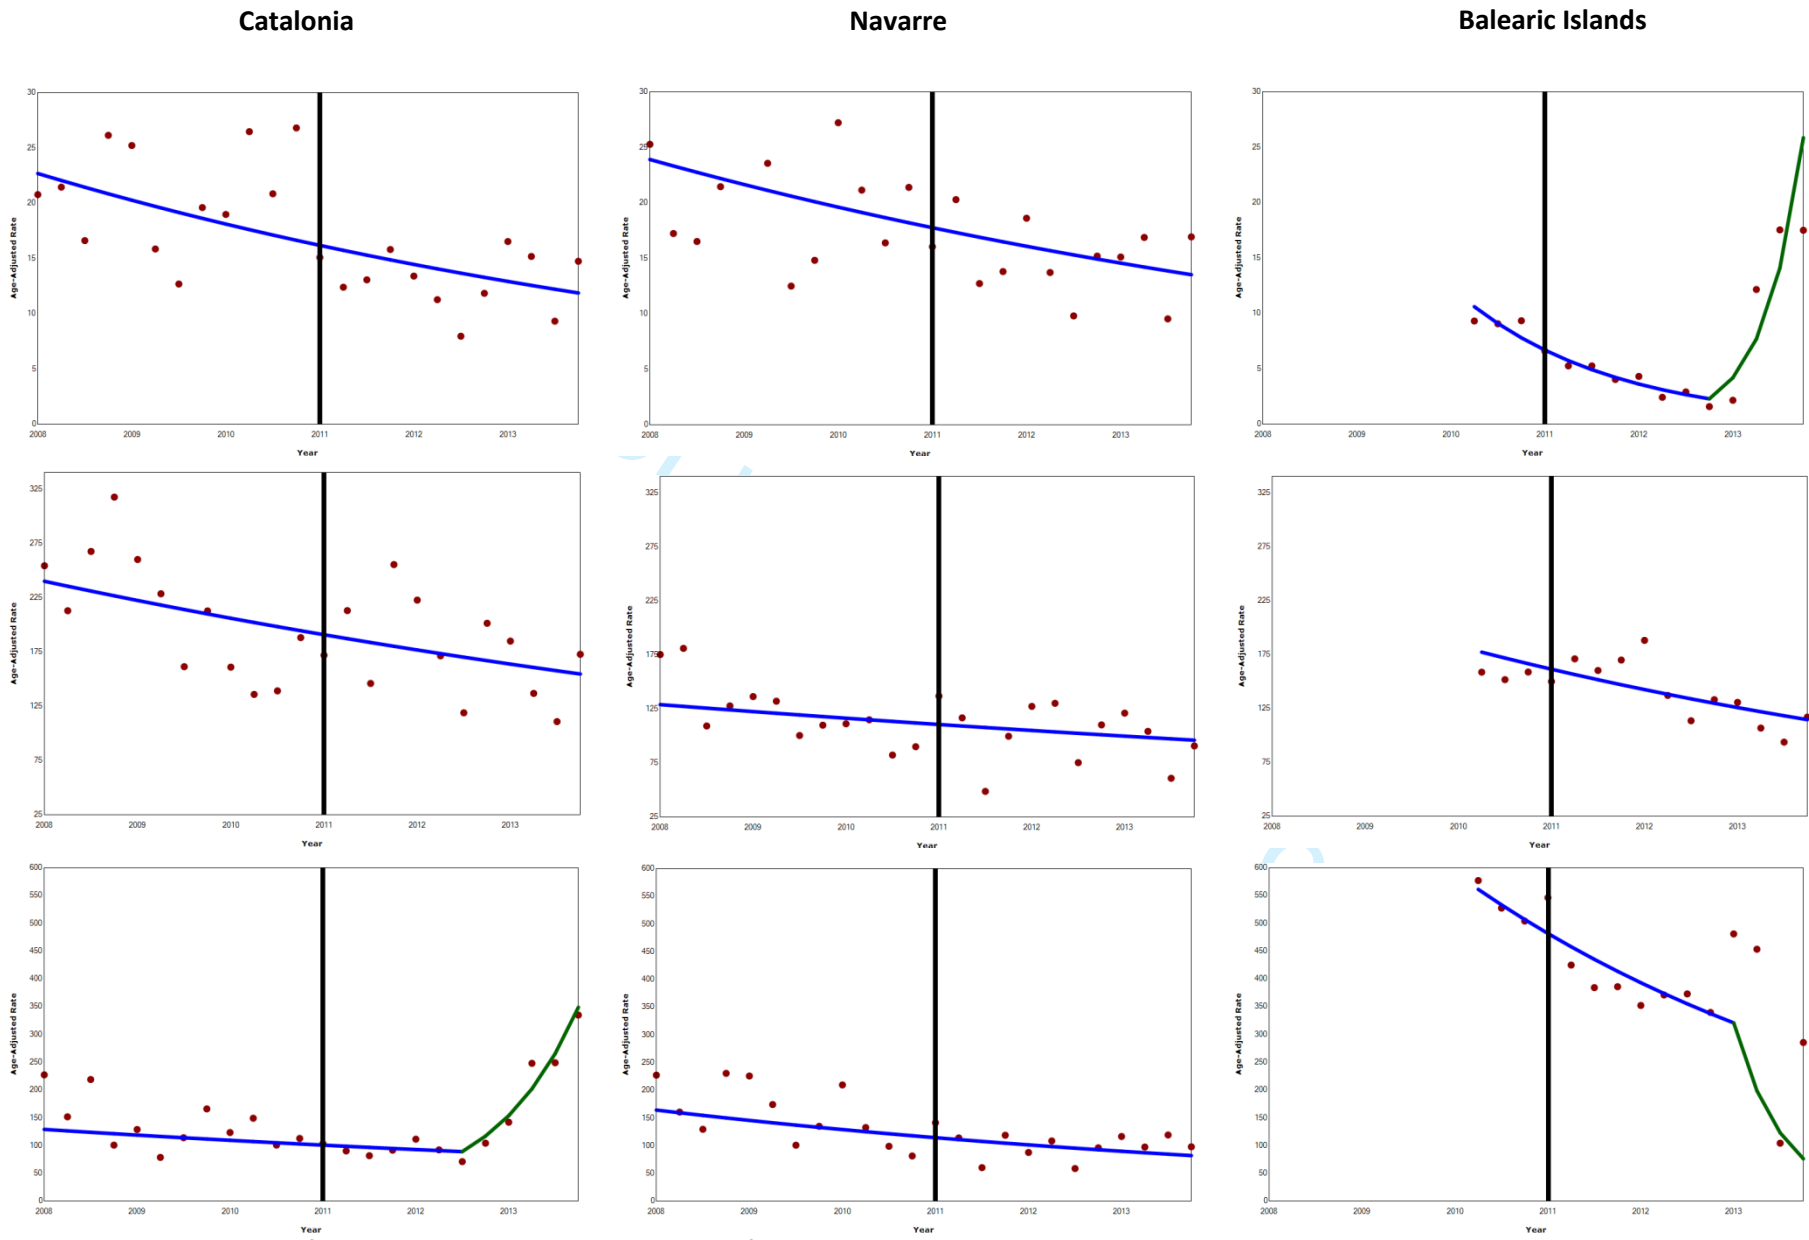

**Figure S2: Overall trends of age-standardized incidence rates of new smokers, ex-smokers and ex-smoker relapse in Catalonia, Navarre and the Balearic Islands.** Solid lines represent the Joinpoint regression lines (each colour is a different trend); circle red points represent the age-adjusted incidence rates. Black vertical lines represent the year when the Spanish comprehensive smoke-free law was introduced (2011).

**STROBE 2007 (v4) Statement—Checklist of items that should be included in reports of *cross-sectional studies***

| Section/Topic                | Item # | Recommendation                                                                                                                                                                       | Reported on page # |
|------------------------------|--------|--------------------------------------------------------------------------------------------------------------------------------------------------------------------------------------|--------------------|
| <b>Title and abstract</b>    | 1      | (a) Indicate the study's design with a commonly used term in the title or the abstract                                                                                               | 3                  |
|                              |        | (b) Provide in the abstract an informative and balanced summary of what was done and what was found                                                                                  | 3                  |
| <b>Introduction</b>          |        |                                                                                                                                                                                      |                    |
| Background/rationale         | 2      | Explain the scientific background and rationale for the investigation being reported                                                                                                 | 5-6                |
| Objectives                   | 3      | State specific objectives, including any prespecified hypotheses                                                                                                                     | 6                  |
| <b>Methods</b>               |        |                                                                                                                                                                                      |                    |
| Study design                 | 4      | Present key elements of study design early in the paper                                                                                                                              | 6                  |
| Setting                      | 5      | Describe the setting, locations, and relevant dates, including periods of recruitment, exposure, follow-up, and data collection                                                      | 6-7                |
| Participants                 | 6      | (a) Give the eligibility criteria, and the sources and methods of selection of participants                                                                                          | 6-7                |
| Variables                    | 7      | Clearly define all outcomes, exposures, predictors, potential confounders, and effect modifiers. Give diagnostic criteria, if applicable                                             | 7                  |
| Data sources/<br>measurement | 8*     | For each variable of interest, give sources of data and details of methods of assessment (measurement). Describe comparability of assessment methods if there is more than one group | 7                  |
| Bias                         | 9      | Describe any efforts to address potential sources of bias                                                                                                                            | 7                  |
| Study size                   | 10     | Explain how the study size was arrived at                                                                                                                                            | 6 + Figure 1       |
| Quantitative variables       | 11     | Explain how quantitative variables were handled in the analyses. If applicable, describe which groupings were chosen and why                                                         | 7-8                |
| Statistical methods          | 12     | (a) Describe all statistical methods, including those used to control for confounding                                                                                                | 7-8                |
|                              |        | (b) Describe any methods used to examine subgroups and interactions                                                                                                                  | 7-8                |
|                              |        | (c) Explain how missing data were addressed                                                                                                                                          | 6 + 15             |
|                              |        | (d) If applicable, describe analytical methods taking account of sampling strategy                                                                                                   |                    |
|                              |        | (e) Describe any sensitivity analyses                                                                                                                                                |                    |
| <b>Results</b>               |        |                                                                                                                                                                                      |                    |

|                          |     |                                                                                                                                                                                                              |                  |
|--------------------------|-----|--------------------------------------------------------------------------------------------------------------------------------------------------------------------------------------------------------------|------------------|
| Participants             | 13* | (a) Report numbers of individuals at each stage of study—eg numbers potentially eligible, examined for eligibility, confirmed eligible, included in the study, completing follow-up, and analysed            | 6, 8. Figure 1   |
|                          |     | (b) Give reasons for non-participation at each stage                                                                                                                                                         | 6. Figure 1      |
|                          |     | (c) Consider use of a flow diagram                                                                                                                                                                           | 6. Figure 1      |
| Descriptive data         | 14* | (a) Give characteristics of study participants (eg demographic, clinical, social) and information on exposures and potential confounders                                                                     | 8. Table 1.      |
|                          |     | (b) Indicate number of participants with missing data for each variable of interest                                                                                                                          | 8                |
| Outcome data             | 15* | Report numbers of outcome events or summary measures                                                                                                                                                         | 8-12. Tables 2-4 |
| Main results             | 16  | (a) Give unadjusted estimates and, if applicable, confounder-adjusted estimates and their precision (eg, 95% confidence interval). Make clear which confounders were adjusted for and why they were included | 8-12. Tables 2-4 |
|                          |     | (b) Report category boundaries when continuous variables were categorized                                                                                                                                    |                  |
|                          |     | (c) If relevant, consider translating estimates of relative risk into absolute risk for a meaningful time period                                                                                             |                  |
| Other analyses           | 17  | Report other analyses done—eg analyses of subgroups and interactions, and sensitivity analyses                                                                                                               |                  |
| <b>Discussion</b>        |     |                                                                                                                                                                                                              |                  |
| Key results              | 18  | Summarise key results with reference to study objectives                                                                                                                                                     | 13               |
| Limitations              | 19  | Discuss limitations of the study, taking into account sources of potential bias or imprecision. Discuss both direction and magnitude of any potential bias                                                   | 14-15            |
| Interpretation           | 20  | Give a cautious overall interpretation of results considering objectives, limitations, multiplicity of analyses, results from similar studies, and other relevant evidence                                   | 13-15            |
| Generalisability         | 21  | Discuss the generalisability (external validity) of the study results                                                                                                                                        | 15               |
| <b>Other information</b> |     |                                                                                                                                                                                                              |                  |
| Funding                  | 22  | Give the source of funding and the role of the funders for the present study and, if applicable, for the original study on which the present article is based                                                | 15-16            |

\*Give information separately for cases and controls in case-control studies and, if applicable, for exposed and unexposed groups in cohort and cross-sectional studies.

**Note:** An Explanation and Elaboration article discusses each checklist item and gives methodological background and published examples of transparent reporting. The STROBE checklist is best used in conjunction with this article (freely available on the Web sites of PLoS Medicine at <http://www.plosmedicine.org/>, Annals of Internal Medicine at <http://www.annals.org/>, and Epidemiology at <http://www.epidem.com/>). Information on the STROBE Initiative is available at [www.strobe-statement.org](http://www.strobe-statement.org).

# BMJ Open

## Effect of the comprehensive smoke-free law on time trends in smoking behaviour in Primary Health Care patients in Spain: a longitudinal observational study

|                                 |                                                                                                                                                                                                                                                                                                                                                                                                                                                                                                                                                                                                                                                                                                                                                                                                                                                                                                                                                                                                                                                                                                                                                                                                                                                                                                                    |
|---------------------------------|--------------------------------------------------------------------------------------------------------------------------------------------------------------------------------------------------------------------------------------------------------------------------------------------------------------------------------------------------------------------------------------------------------------------------------------------------------------------------------------------------------------------------------------------------------------------------------------------------------------------------------------------------------------------------------------------------------------------------------------------------------------------------------------------------------------------------------------------------------------------------------------------------------------------------------------------------------------------------------------------------------------------------------------------------------------------------------------------------------------------------------------------------------------------------------------------------------------------------------------------------------------------------------------------------------------------|
| Journal:                        | <i>BMJ Open</i>                                                                                                                                                                                                                                                                                                                                                                                                                                                                                                                                                                                                                                                                                                                                                                                                                                                                                                                                                                                                                                                                                                                                                                                                                                                                                                    |
| Manuscript ID                   | bmjopen-2017-020120.R2                                                                                                                                                                                                                                                                                                                                                                                                                                                                                                                                                                                                                                                                                                                                                                                                                                                                                                                                                                                                                                                                                                                                                                                                                                                                                             |
| Article Type:                   | Research                                                                                                                                                                                                                                                                                                                                                                                                                                                                                                                                                                                                                                                                                                                                                                                                                                                                                                                                                                                                                                                                                                                                                                                                                                                                                                           |
| Date Submitted by the Author:   | 14-Jun-2018                                                                                                                                                                                                                                                                                                                                                                                                                                                                                                                                                                                                                                                                                                                                                                                                                                                                                                                                                                                                                                                                                                                                                                                                                                                                                                        |
| Complete List of Authors:       | <p>Pons-Vigués, Mariona; Institut Universitari d'Investigació en Atenció Primària Jordi Gol (IDIAP Jordi Gol), Rando-Matos , Yolanda; Centre d'Atenció Primària (CAP) Florida Nord. Institut Català de la Salut (ICS); Institut Universitari d'Investigació en Atenció Primària Jordi Gol (IDIAP Jordi Gol)</p> <p>Rodriguez-Blanco, Teresa; IDIAP Jordi Gol Foundation IDIAP Jordi Gol Foundation, Department of Epidemiology and Biostatistics</p> <p>Ballvé-Moreno , Josep Lluís ; Centre d'Atenció Primària (CAP) Florida Nord. Institut Català de la Salut (ICS) ; Institut Universitari d'Investigació en Atenció Primària Jordi Gol (IDIAP Jordi Gol)</p> <p>Ripoll, Joana; Balears Health services-IbSalut, 1. Primary Care Research Unit of Mallorca</p> <p>Llobera, Joan; Balears Health services-IbSalut, 1. Primary Care Research Unit of Mallorca</p> <p>Morán, Julio; Equipo de Atención Primaria de Tafalla. Servicio Navarro de Salud</p> <p>López-Jiménez, Tomàs; Institut Universitari d'Investigació en Atenció Primària Jordi Gol (IDIAP Jordi Gol)</p> <p>Violan-Fors, Concepción; Institut Universitari d'Investigació en Atenció Primària Jordi Gol (IDIAP Jordi Gol)</p> <p>Bolibar, Bonaventura; Institut Universitari d'Investigació en Atenció Primària Jordi Gol (IDIAP Jordi Gol)</p> |
| <b>Primary Subject Heading</b>: | Smoking and tobacco                                                                                                                                                                                                                                                                                                                                                                                                                                                                                                                                                                                                                                                                                                                                                                                                                                                                                                                                                                                                                                                                                                                                                                                                                                                                                                |
| Secondary Subject Heading:      | Epidemiology, General practice / Family practice, Health policy                                                                                                                                                                                                                                                                                                                                                                                                                                                                                                                                                                                                                                                                                                                                                                                                                                                                                                                                                                                                                                                                                                                                                                                                                                                    |
| Keywords:                       | Electronic health records, Joinpoint analysis, Primary Health Care, Smoke-Free Policy, Smoking                                                                                                                                                                                                                                                                                                                                                                                                                                                                                                                                                                                                                                                                                                                                                                                                                                                                                                                                                                                                                                                                                                                                                                                                                     |
|                                 |                                                                                                                                                                                                                                                                                                                                                                                                                                                                                                                                                                                                                                                                                                                                                                                                                                                                                                                                                                                                                                                                                                                                                                                                                                                                                                                    |

SCHOLARONE™  
Manuscripts

1  
2  
3 **Effect of the comprehensive smoke-free law on time trends in smoking behaviour in Primary Health Care patients in**  
4 **Spain: a longitudinal observational study**  
5

6  
7 **Author names and affiliations**

8 Mariona Pons-Vigués <sup>a,b,c</sup>

9 <sup>a</sup> Institut Universitari d'Investigació en Atenció Primària Jordi Gol (IDIAP Jordi Gol), Barcelona, Spain

10 <sup>b</sup> Universitat Autònoma de Barcelona, Bellaterra (Cerdanyola del Vallès), Spain.

11 <sup>c</sup> Universitat de Girona, Girona, Spain

12 e-mail: mponsv@idiapjgol.info

13  
14 Yolanda Rando-Matos <sup>d,a</sup>

15 <sup>d</sup> Centre d'Atenció Primària (CAP) Florida Nord. Institut Català de la Salut (ICS), Hospitalet de Llobregat, Barcelona, Spain

16 <sup>a</sup> Institut Universitari d'Investigació en Atenció Primària Jordi Gol (IDIAP Jordi Gol), Barcelona, Spain

17 e-mail: yrando@ambitcp.catsalut.net

18  
19 Teresa Rodriguez-Blanco <sup>a,b</sup>

20 <sup>a</sup> Institut Universitari d'Investigació en Atenció Primària Jordi Gol (IDIAP Jordi Gol), Barcelona, Spain

21 <sup>b</sup> Universitat Autònoma de Barcelona, Bellaterra (Cerdanyola del Vallès), Spain

22 e-mail: trodriguez@idiapjgol.org

23  
24 Josep Lluís Ballvé-Moreno <sup>d,a</sup>

25 <sup>d</sup> Centre d'Atenció Primària (CAP) Florida Nord. Institut Català de la Salut (ICS), Hospitalet de Llobregat, Barcelona, Spain

26 <sup>a</sup> Institut Universitari d'Investigació en Atenció Primària Jordi Gol (IDIAP Jordi Gol), Barcelona, Spain

27 e-mail: jlballve@ambitcp.catsalut.net

28  
29 Joana Ripoll <sup>e,f</sup>

30 <sup>e</sup> Primary Care Research Unit of Mallorca, Balears Health Services-Ibsalut, Palma, Spain

31 <sup>f</sup> Balearic Islands Health Research Institute (IdISBa), Palma, Spain

32 e-mail: jripoll@ibsalut.caib.es

33  
34 Joan Llobera <sup>e,f</sup>

35 <sup>e</sup> Primary Care Research Unit of Mallorca, Balears Health Services-Ibsalut, Palma, Spain

36 <sup>f</sup> Balearic Islands Health Research Institute (IdISBa), Palma, Spain

37 e-mail: jllobera@ibsalut.caib.es

38  
39 Julio Morán <sup>g</sup>

40 <sup>g</sup> Equipo de Atención Primaria de Tafalla. Servicio Navarro de Salud. Barasoain, Navarra, Spain.

41 e-mail: jmoranpi@navarra.es

42  
43 Tomàs López-Jiménez

44 <sup>a</sup> Institut Universitari d'Investigació en Atenció Primària Jordi Gol (IDIAP Jordi Gol), Barcelona, Spain

45 <sup>b</sup> Universitat Autònoma de Barcelona, Bellaterra (Cerdanyola del Vallès), Spain

46 e-mail: tlopez@idiapjgol.org

47  
48 Concepció Violán-Fors <sup>a,b</sup>

49 <sup>a</sup> Institut Universitari d'Investigació en Atenció Primària Jordi Gol (IDIAP Jordi Gol), Barcelona, Spain

50 <sup>b</sup> Universitat Autònoma de Barcelona, Bellaterra (Cerdanyola del Vallès), Spain

51 e-mail: cviolan@idiapjgol.org

52  
53 Bonaventura Bolibar <sup>a,b</sup>

54 <sup>a</sup> Institut Universitari d'Investigació en Atenció Primària Jordi Gol (IDIAP Jordi Gol), Barcelona, Spain

55 <sup>b</sup> Universitat Autònoma de Barcelona, Bellaterra (Cerdanyola del Vallès), Spain

56 e-mail: bbolibar@idiapjgol.org

1  
2  
3 **Corresponding author:** Mariona Pons-Vigués

4 e-mail: [mponsv@idiapjgol.info](mailto:mponsv@idiapjgol.info)

5 Institut Universitari d'Investigació en Atenció Primària Jordi Gol (IDIAP Jordi Gol), Barcelona, Spain

6 Av. Gran Via de les Corts Catalanes 587, àtic

7 08007 - Barcelona

8 Tel: 0034 93 482 42 53

9 [www.idiapjgol.org](http://www.idiapjgol.org)

10 <http://orcid.org/0000-0002-7929-3701>

11  
12 **Word count:** 4319 words

13  
14  
15  
16  
17  
18  
19  
20  
21  
22  
23  
24  
25  
26  
27  
28  
29  
30  
31  
32  
33  
34  
35  
36  
37  
38  
39  
40  
41  
42  
43  
44  
45  
46  
47  
48  
49  
50  
51  
52  
53  
54  
55  
56  
57  
58  
59  
60

For peer review only

1  
2  
3 **Effect of the comprehensive smoke-free law on time trends in smoking behaviour in Primary Health Care patients in**  
4 **Spain: a longitudinal observational study**  
5

6  
7 **ABSTRACT**

8 **Objective:** This study aimed to analyse the impact of comprehensive smoke-free legislation on the prevalence and  
9 incidence of adult smoking in Primary Health Care patients from three Spanish regions, overall and stratified by sex.

10  
11 **Design:** Longitudinal observational study conducted between 2008 and 2013.

12  
13 **Setting:** 66 Primary Health Care teams in Catalonia, Navarre and the Balearic Islands (Spain).

14  
15 **Participants:** Population over 15 years of age assigned to Primary Health Care teams.

16  
17 **Primary and secondary outcomes measures:** Quarterly age-standardized prevalence of non-smoker, smoker and ex-  
18 smoker and incidence of new smoker, new ex-smoker and ex-smoker relapse rates were estimated with data retrieved  
19 from PHC electronic health records. Joinpoint analysis was used to analyse the trends of age-standardized prevalence  
20 and incidence rates. Trends were expressed as annual percentage change and average annual percent change.

21  
22 **Results:** The overall standardized smoker prevalence rate showed a significant downward trend (higher in men than  
23 women) and the overall standardized ex-smoker prevalence rate showed a significant increased trend (higher in women  
24 than men) in the three regions. Standardized smoker and ex-smoker prevalence rates were higher for men than women  
25 in all regions. With regard to overall trends of incidence rates, new smokers decreased significantly in Catalonia and  
26 Navarre and similarly in men and women, new ex-smokers decreased significantly and more in men in Catalonia and  
27 the Balearic Islands, and ex-smoker relapse increased in Catalonia, particularly in women, and decreased in Navarre.

28  
29  
30 **Conclusions:** Trends on smoking behaviour in Primary Health Care patients remain unchanged after the implementation  
31 of comprehensive smoke-free legislation.  
32

33  
34 **Keywords:** Electronic health records; Joinpoint analysis; Primary Health Care; Smoke-Free Policy; Smoking.  
35  
36  
37  
38  
39  
40  
41  
42  
43  
44  
45  
46  
47  
48  
49  
50  
51  
52  
53  
54  
55  
56  
57  
58  
59  
60



**Strengths and limitations of this study**

- To our knowledge, no studies have been published on the impact of the Spanish comprehensive smoke-free legislation in all adult Primary Health Care patients
- Used as a research tool, electronic health records portray real-life conditions and provide comprehensive, long-term health histories from a large population sample
- The results of quarterly data by joinpoint analysis provides more precise information than an analysis before-after the implementation of the Law
- This study only considered age and sex since other variables were not available for the adjusted analysis.
- The study period started later (shorter follow-up) in the Balearic Islands to ensure reliability of data

## Effect of the Spanish comprehensive smoke-free law on time trends in smoking behaviour in Primary Health Care patients in Spain: a longitudinal observational study

### INTRODUCTION

Smoking is the leading worldwide cause of preventable death.<sup>1</sup> According to the World Health Organization (WHO), it is estimated that at least 30 million people may die prematurely from tobacco-related diseases.<sup>2</sup> Legislative measures have been adopted to protect people's health in public areas and workplaces. These include increasing the price of cigarettes, banning advertising, sponsorship and smoking in workplaces and public spaces, displaying warnings on tobacco packets and implementing prevention programs.<sup>3</sup>

Some studies show a decrease in smoking prevalence since the introduction of smoke-free legislation (SFL).<sup>4-9</sup> A meta-analysis of 26 studies on the effect of the smoke-free workplace in various countries concluded in 2002 that smoke-free workplaces protect not only non-smokers from the dangers of passive smoking, but they also encourage smokers to reduce tobacco consumption. The authors concluded that SFL is associated with a 3% to 4% reduction in tobacco consumption.<sup>10</sup> In contrast, a Cochrane review published in 2016 which included 24 studies on smoking behaviour showed inconsistencies regarding the impact of smoking bans on smoking prevalence and tobacco consumption.<sup>11</sup>

On January 1, 2006, the Spanish government introduced a partial SFL (Law 28/2005),<sup>12</sup> which included regulations on the sale, supply, consumption and advertising of tobacco products. Smoking was banned in all indoor public and private workplaces with the exception of the hospitality sector, where partial restrictions were established depending on the size of the establishment, i.e., in bars or restaurants smaller than 100 m<sup>2</sup> the managers could decide whether to allow smoking in the premises (Law 28/2005). The mean concentration of nicotine subsequently decreased by 60% in public administration offices and by 97.4% in private workplaces, but in areas where smoking was permitted, including bars and nightclubs, no changes were found.<sup>13-15</sup> This prompted the enactment of a comprehensive SFL (Law 42/2010),<sup>16</sup> which came into force in January 2011. This comprehensive law expanded smoking restriction to all hospitality venues of any size and, as a result, smoking was forbidden in all enclosed public places, including bars, restaurants and nightclubs, and in some open-air public places such as playgrounds.

Some studies have analysed the impact of these two Spanish laws on smoking prevalence. However, most have been based on health surveys<sup>13,17-20</sup> and surveys of hospitality workers.<sup>21,22</sup> Moreover, some studies evaluate only the partial law,<sup>13,17,18</sup> whereas others analyse the compound impact of both laws.<sup>19,20,23,24</sup> The results of these studies are often conflicting; while some conclude that the partial SFL does not have any effect on the downward trend in the prevalence of smokers,<sup>13,19,23</sup> other studies show a reduction in smoking prevalence<sup>24</sup>, an increase of the smoking quit-ratio in the short term<sup>18</sup> and minor increases in the prevalence of active smoking.<sup>20</sup>

Only one study conducted in primary health care (PHC) patients evaluates the impact of the Spanish partial SFL, including smoking prevalence in active smoker workers that attended PHC visits; one month after the implementation

1  
2  
3 of the law, a 9.5% decline of smokers was observed.<sup>25</sup> To our knowledge, no studies have been published on the impact  
4 of the Spanish comprehensive SFL in all adult PHC patients. In view of the pivotal role of PHC services in smoking habits,  
5 we consider that the information registered in PHC records is a good proxy to generate up-to-date evidence and to  
6 evaluate the impact of comprehensive SFL in the general population.  
7  
8  
9

10 We hypothesized that Law 42/2010 does not only reduce exposure to environmental cigarette smoke and its harmful  
11 effects but crucially, it promotes smoking denormalisation in society, thus encouraging smokers to quit or reduce  
12 consumption and discouraging non-smokers from initiating this habit. Accordingly, the aim of this study was to examine  
13 the impact of the Spanish comprehensive SFL (Law 42/2010) on the prevalence and incidence of adult smoking in PHC  
14 patients in three regions (Catalonia, Navarre and Balearic Islands), during the 2008-2013 period, overall and stratified  
15 by sex.  
16  
17  
18  
19  
20  
21  
22  
23  
24  
25  
26  
27  
28  
29  
30  
31  
32  
33  
34  
35  
36  
37  
38  
39  
40  
41  
42  
43  
44  
45  
46  
47  
48  
49  
50  
51  
52  
53  
54  
55  
56  
57  
58  
59  
60

## METHODS

### Design, study participants and information source

Longitudinal observational study of the adult population assigned to 66 Primary Health Care teams (PHCT) in three Spanish regions: Catalonia, Navarre and the Balearic Islands (22 PHCT per region). Inclusion criteria of the PHCT were: 1) computerization of electronic health records (EHR) by January 1, 2005 in Catalonia and Navarre, and 2008 in the Balearic Islands; and 2) agreement to participate in the study by over 80% health-care professionals working in each PHCT. Random cluster sampling was stratified by region, with the PHCT as randomization unit.<sup>26</sup> In each PHCT, General Practitioners (GP) with a patient list between 400 and 3000 were selected. GP with shorter patient lists were accepted if it was their first year in the PHCT.

The study period included from the first quarter of 2008 to the fourth quarter of 2013 in Catalonia and Navarre; and from the second quarter of 2010 to the fourth quarter of 2013 in the Balearic Islands. The study started in 2008 to obtain data from the 2 years prior analysis, a requirement to adequately construct the variable ex-smoker. In the case of the Balearic Islands, the study started later to ensure reliability of data.

Inclusion criteria for patients were: 1) Population allocated to the selected PHCT for the whole 2007-2013 period in Catalonia and Navarre; in the Balearic Islands, patients allocated to the selected PHCT in 2013 and evaluated retrospectively (no historical annual comprehensive register of allocation of patients was available). 2) Age  $\geq 16$  and  $\leq 100$  years in 2007 in Catalonia and Navarre, and 2010 in the Balearic Islands. 3) In order to have data in the EHR collected during the study period, a minimum of one visit to their PHCT during the 2007-2013 period in Catalonia and Navarre and 2010-2013 in the Balearic Islands; and 4) Information on smoking habit recorded in the EHR for the quarter prior to the onset of the study: last quarter of 2007 in Catalonia and Navarre and first quarter of 2010 in the Balearic Islands, to enable the adequate construction of the various variables. Thus, closed cohorts (with fixed membership, where nobody is added nor excluded after the study begins) were constituted in the three regions. Figure 1 shows the flowchart of the study.

Data were retrieved from the REGIPREV database,<sup>26</sup> which contains encrypted and anonymized clinical information recorded in the EHR by these 66 PHCT. An algorithm was applied to extract equivalent data from the health records software used in each region: "ECAP" in Catalonia, "Atenea" in Navarre and "e-siap" in the Balearic Islands. Codes of the International Classification of Diseases, 9th revision in the Balearic Islands (ICD-9) and 10th in Catalonia (ICD 10<sup>th</sup> revision)<sup>27</sup> and the International Classification of Primary Care, Second edition, in Navarre (ICPC-2)<sup>28</sup> were used.

### Variables

Information on smoking is registered in the electronic health records using diagnostic codes to classify diseases (codes F17.0 to F17.9 and Z72.0 of the ICD-10, 305.1 of the ICD-9 and P17 of the ICPC-2), and also clinical variables (number of cigarettes per day, history of smoking, history of advice for smoking cessation). This information is stored with the entry date (Supplementary File Table S1). With the information on smoking status and entry date we created the following dependent variables at the end of each quarter of the study period:

- 1  
2  
3 - Smoking status (three categories): 1) non-smoker: patient that has never been a tobacco consumer, 2) smoker:  
4 tobacco consumer or patient that has quit smoking for less than 12 months; and 3) ex-smoker: patient who used to  
5 smoke but has quit smoking for at least 12 continuous months. When the EHR did not contain a new entry related  
6 to smoking status (diagnostic codes or clinical variables), we considered that no changes in smoking status had  
7 taken place and thus that the last observation was still valid.  
8  
9  
10 - New smoker: patient non-smoker for the 12 months prior to the considered quarter that has started smoking  
11 during said quarter.  
12  
13 - New ex-smoker: the patient was a smoker two years before the considered quarter and has continuously abstained  
14 from tobacco for at least 12 months.  
15  
16 - Ex-smoker relapse: patient ex-smoker during the 12 months prior to the considered quarter that has started  
17 smoking again during said quarter.

18 For higher accuracy in prevalence and incidence changes, quarterly estimates were calculated.  
19  
20

21 The following variables of each patient were collected at baseline (2008 in Catalonia and Navarre; 2010 in the Balearic  
22 Islands): age, sex (male/female), annual number of health problems and annual number of PHC visits. The number of  
23 health problems was used as a morbidity indicator; it was calculated as the sum of the number of different active  
24 health problems (chronic and acute, coded by ICPC-2).  
25  
26

### 27 **Data analyses**

28 Descriptive statistics were used to summarize overall information. Categorical variables were expressed as percentage,  
29 and continuous variables as mean (standard deviation) or median (interquartile range [IQR]).  
30  
31  
32

33 Because the three regions used different EHR systems (different standards and computer programs), have different  
34 socioeconomic characteristics, different complementary measures to the SFL and also due to the shorter study period  
35 in the Balearic Islands, we performed a stratified analysis per region, overall and by sex. Age-standardized prevalence  
36 (non-smokers, smokers and ex-smokers) and incidence (new smokers, new ex-smokers and ex-smoker relapse) rates  
37 were calculated for each quarter using the direct method, and based on the European Standard Population (rates per  
38 10,000 inhabitants).  
39  
40  
41  
42  
43

44 Joinpoint analysis was used to analyse the trends of age-standardized prevalence (smokers and ex-smokers) and  
45 incidence rates (new smokers, new ex-smokers and ex-smoker relapse) and to identify the best-fitting points (the  
46 'joinpoints', in calendar quarters) where the rate changes significantly in the linear slope of the temporal trend.  
47 Significant changes include changes in direction or in the rate of increase or decrease<sup>29</sup>. Joinpoint analysis estimates the  
48 magnitude of the increase or the decrease observed in each specified time interval by estimating the annual percentage  
49 change (APC). In addition, temporal trends were expressed as the average annual percent change (AAPC), computed to  
50 summarize and compare these trends over the entire time period. Ninety-five percent confidence intervals (95% CI) of  
51 APC and AAPC were calculated. The trend of non-smoker prevalence rates was not calculated because the study  
52  
53  
54  
55  
56  
57  
58  
59  
60

1  
2  
3 consisted of a closed cohort where no new participants are recruited, and thus the prevalence of non-smokers can  
4 either remain the same or decrease, but never increase.  
5  
6

7 Analyses were performed using Stata/SE version 14.2 for Windows (Stata Corp. LP, College Station, Texas, US). The  
8 joinpoint regression analysis was carried out using the joinpoint software from the Surveillance Research Program of  
9 the US National Cancer Institute [ref. Joinpoint Regression Program, Version 4.3.1. April, 2016; Statistical Research and  
10 Applications Branch, National Cancer Institute] (National Cancer Institute. Statistical Research and Applications Branch)  
11 [On-line: <https://surveillance.cancer.gov/branches/srab/>].  
12  
13  
14

### 15 **Patient and public involvement**

16 Study population were not involved in the development of the research question or the outcome measures nor the  
17 design of the study. The results will be presented to citizens through informative activities and the media.  
18  
19  
20  
21  
22  
23  
24  
25  
26  
27  
28  
29  
30  
31  
32  
33  
34  
35  
36  
37  
38  
39  
40  
41  
42  
43  
44  
45  
46  
47  
48  
49  
50  
51  
52  
53  
54  
55  
56  
57  
58  
59  
60

## RESULTS

The study population was 392,966 patients: 141,071 in Catalonia, 73,644 in Navarre and 178,251 in the Balearic Islands (Figure 1). At the onset of the study, the mean age was 50.4 years in Catalonia, 54.0 in Navarre and 47.7 in the Balearic Islands. In the three cohorts more than half were women (>51 %). Catalonia presented the highest median number of visits (9, IQR: 3 -16) and the Balearic Islands presented the highest number of recorded active health problems per patient (median 10, IQR: 6-16) (Table 1).

**Table 1: Characteristics of the cohort study population by region at the onset of the study (2008 in Catalonia and Navarre, 2010 in the Balearic Islands).**

|                                                          | Catalonia<br>N =141,071             | Navarre<br>N = 73,644             | Balearic Islands<br>N =178,251      |
|----------------------------------------------------------|-------------------------------------|-----------------------------------|-------------------------------------|
| Age (years), SD                                          | 50.37 (17.23)                       | 54.04 (18.26)                     | 47.65 (17.56)                       |
| Sex (female),<br>number (%)                              | 72340 (51.28)                       | 37898 (51.46)                     | 94164 (52.83)                       |
| Number of visits,<br>mean (SD); median<br>(IQR)          | 11.69 (12.19);<br>9.00 (3.00-16.00) | 8.93 (9.30);<br>7.00 (3.00-12.00) | 11.01 (13.25);<br>7.00 (3.00-15.00) |
| Number of health<br>problems, mean<br>(SD); median (IQR) | 6.23 (4.58);<br>5.00 (3.00-8.00)    | 9.95 (5.39);<br>9.00 (6.00-13.00) | 11.85 (7.74);<br>10.00 (6.00-16.00) |

Abbreviations: SD, standard deviation; IQR, interquartile range.  
Patients belonged to 22 Primary Health Care Teams in each region.

The **overall standardized smoker prevalence rates** were of similar magnitude in the three regions (ranges of 3579.2 - 4138.9 in Catalonia; 3719.8 - 4034.2 in Navarre; and 3787.4 - 4029.7 in the Balearic Islands). The prevalence rate decreased in Navarre during the whole study period, decreased in the Balearic Islands in most quarters, and also in Catalonia except for the last year. These rates were higher for men than for women in all regions (Supplementary File Tables S2-S7). A significant downward **overall trend of smoker prevalence rates** was found in Catalonia (AAPC=- 2.02), Navarre (AAPC= -1.40) and the Balearic Islands (AAPC= -1.75); this downward trend was higher for men than for women in the three regions. In Catalonia, the most significant reduction occurred during the period 2010.3-2011.2 (APC= -8.77), similarly to the Balearic Islands (2010.2-2012.4; APC= -2.11), whereas in Navarre it occurred between 2008.1-2011.3 (APC= -1.69) (Tables 2, 3, 4, Supplementary File Figure S1).

For the whole period, the **overall standardized ex-smoker prevalence rates** increased in Navarre, in the Balearic Islands and in Catalonia except for the last year. The rates in Catalonia were higher (ranges of: 1168.5 - 1781.2 in Catalonia; 313.3 - 764.1 in Navarre; and 559.3 - 914.1 in the Balearic Islands). The standardized ex-smoker prevalence rates were higher for men than for women in all regions (Supplementary File Tables S2-S7). The **overall trend of ex-smoker prevalence rates** increased significantly in the three regions throughout the study period but was higher in Navarre (Navarre AAPC= 16.67; Catalonia AAPC= 7.18; Balearic Islands AAPC= 14.92). The increase in the prevalence rate of ex-smokers was higher for the 2008.1-2008.3 period in Catalonia and Navarre, and for 2010.2-2012.2 in the Balearic

1  
2  
3 Islands, and higher in women in the three regions (women: Catalonia AAPC= 10.83; Navarre AAPC=17.37 and Balearic  
4 Islands AAPC= 19.20) (Tables 2, 3, 4, Supplementary File Figure S1).  
5

6  
7 The **overall new smoker standardized incidence rates** showed low values in the three regions (ranges of 7.9 - 26.8 in  
8 Catalonia; 9.5 - 30.9 in Navarre; 1.6 - 17.5 in the Balearic Islands) and higher for men than for women in Catalonia and  
9 Navarre (Supplementary File Tables S2-S7). The **overall trend of new smoker incidence rates** decreased significantly in  
10 Catalonia (AAPC= -10.65) and Navarre (AAPC= -9.44); additionally, the decline was similar for men and women. In  
11 contrast, the trend remained stable in the Balearic Islands (Tables 2, 3, 4, Supplementary File Figure S2).  
12  
13

14  
15 The **overall standardized new ex-smoker incidence rates** showed higher values in Catalonia (range: 110.7 - 317.6) than  
16 in Navarre (range: 48.6 - 181.0) and the Balearic Islands (range: 93.7 - 188.1) (Supplementary File Tables S2-S7). The  
17 **overall trend of new ex-smoker incidence rates** showed a significant decrease in Catalonia (AAPC= -7.37) and especially  
18 in the Balearic Islands (AAPC= -11.72). This downward trend was higher for men than for women in Catalonia and the  
19 Balearic Islands (Tables 2, 3, 4, Supplementary File Figure S2).  
20  
21  
22

23  
24 The **overall standardized ex-smoker relapse incidence rates** presented higher values in the Balearic Islands (range:  
25 103.9 - 576.6) than in Catalonia (range: 70.7 - 334.5) and Navarre (range: 58.6 - 230.3) (Supplementary File Tables S2-  
26 S7). The **overall trend of ex-smoker relapse incidence rates** showed significant increases in Catalonia (AAPC= 18.91),  
27 particularly in women (AAPC= 14.99). In contrast, Navarre showed significant decreases (AAPC= -11.37) (Tables 2, 3, 4,  
28 Supplementary File Figure S2).  
29  
30  
31  
32  
33  
34  
35  
36  
37  
38  
39  
40  
41  
42  
43  
44  
45  
46  
47  
48  
49  
50  
51  
52  
53  
54  
55  
56  
57  
58  
59  
60



**Table 2. Trends in prevalence of smoking status and incidence of new smokers, ex-smokers and ex-smoker relapse. Jointpoints overall and by sex in CATALONIA. N=141,071 (2008-2013)**

|                                     | Trend 1         |                                      | Trend 2         |                                      | Trend 3         |                                     | Trend 4         |                                      | Trend 5         |                                     | AAPC (95% IC)<br>2008.1 - 2013.4     |
|-------------------------------------|-----------------|--------------------------------------|-----------------|--------------------------------------|-----------------|-------------------------------------|-----------------|--------------------------------------|-----------------|-------------------------------------|--------------------------------------|
|                                     | Time            | APC (95% IC)                         | Time            | APC (95% IC)                         | Time            | APC(95% IC)                         | Time            | APC (95% IC)                         | Time            | APC (95% IC)                        |                                      |
| <b>Smoker prevalence</b>            |                 |                                      |                 |                                      |                 |                                     |                 |                                      |                 |                                     |                                      |
| F                                   | 2008.1 - 2010.3 | -0.48 <sup>d</sup> (-1.03 ; 0.08)    | 2010.3 - 2011.2 | -10.27 <sup>c</sup> (-17.96 ; -1.86) | 2011.2 - 2013.4 | -0.58 <sup>c</sup> (-1.11 ; -0.04)  |                 |                                      |                 |                                     | -1.86 <sup>a</sup> (-2.95 ; -0.75)   |
| M                                   | 2008.1 - 2010.3 | -1.96 <sup>a</sup> (-2.23 ; -1.70)   | 2010.3 - 2011.2 | -8.26 <sup>a</sup> (-12.11 ; -4.24)  | 2011.2 - 2012.4 | -3.01 <sup>a</sup> (-3.82 ; -2.18)  | 2012.4 - 2013.4 | 2.69 <sup>a</sup> (1.48 ; 3.91)      |                 |                                     | -2.30 <sup>a</sup> (-2.86 ; -1.73)   |
| G                                   | 2008.1 - 2010.3 | -1.33 <sup>a</sup> (-1.65 ; -1.00)   | 2010.3 - 2011.2 | -8.77 <sup>b</sup> (-13.46 ; -3.83)  | 2011.2 - 2011.4 | -2.30 <sup>a</sup> (-3.29 ; -1.29)  | 2012.4 - 2013.4 | 2.02 <sup>c</sup> (0.56 ; 3.50)      |                 |                                     | -2.02 <sup>a</sup> (-2.71 ; -1.32)   |
| <b>Ex-smoker prevalence</b>         |                 |                                      |                 |                                      |                 |                                     |                 |                                      |                 |                                     |                                      |
| F                                   | 2008.1 - 2008.4 | 17.32 <sup>a</sup> (13.34 ; 21.44)   | 2008.4 - 2011.2 | 11.23 <sup>a</sup> (10.59 ; 11.87)   | 2011.2 - 2012.1 | 15.78 <sup>a</sup> (8.71 ; 23.30)   | 2012.1 - 2013.1 | 9.61 <sup>a</sup> (6.34 ; 12.98)     | 2013.1 - 2013.4 | 0.52 <sup>d</sup> (-2.16 ; 3.28)    | 10.83 <sup>a</sup> (9.74 ; 11.94)    |
| M                                   | 2008.1 - 2008.3 | 14.77 <sup>c</sup> (3.01 ; 27.86)    | 2008.3 - 2011.1 | 5.48 <sup>a</sup> (4.55 ; 6.42)      | 2011.1 - 2012.4 | 7.54 <sup>a</sup> (5.93 ; 9.17)     | 2012.4 - 2013.4 | -4.85 <sup>a</sup> (-7.29 ; -2.34)   |                 |                                     | 4.99 <sup>a</sup> (3.86 ; 6.13)      |
| G                                   | 2008.1 - 2008.3 | 16.69 <sup>a</sup> (7.59 ; 26.57)    | 2008.3 - 2011.1 | 7.63 <sup>a</sup> (6.90 ; 8.37)      | 2011.1 - 2012.4 | 9.68 <sup>a</sup> (8.40 ; 10.96)    | 2012.4 - 2013.4 | -2.35 <sup>c</sup> (-4.31 ; -0.35)   |                 |                                     | 7.18 <sup>a</sup> (6.31 ; 8.07)      |
| <b>New smokers incidence</b>        |                 |                                      |                 |                                      |                 |                                     |                 |                                      |                 |                                     |                                      |
| F                                   | 2008.1 - 2013.4 | -11.00 <sup>b</sup> (-17.19 ; -4.35) |                 |                                      |                 |                                     |                 |                                      |                 |                                     | -11.00 <sup>b</sup> (-17.19 ; -4.35) |
| M                                   | 2008.1 - 2013.4 | -10.68 <sup>a</sup> (-15.90 ; -5.14) |                 |                                      |                 |                                     |                 |                                      |                 |                                     | -10.68 <sup>a</sup> (-15.90 ; -5.14) |
| G                                   | 2008.1 - 2013.4 | -10.65 <sup>a</sup> (-15.45 ; 5.59)  |                 |                                      |                 |                                     |                 |                                      |                 |                                     | -10.65 <sup>a</sup> (-15.45 ; -5.59) |
| <b>New ex-smokers incidence</b>     |                 |                                      |                 |                                      |                 |                                     |                 |                                      |                 |                                     |                                      |
| F                                   | 2008.1 - 2013.4 | -5.17 <sup>d</sup> (-10.33 ; 0.29)   |                 |                                      |                 |                                     |                 |                                      |                 |                                     | -5.17 <sup>d</sup> (-10.33 ; 0.29)   |
| M                                   | 2008.1 - 2013.4 | -7.89 <sup>b</sup> (-13.23 ; -2.22)  |                 |                                      |                 |                                     |                 |                                      |                 |                                     | -7.89 <sup>b</sup> (-13.23 ; -2.22)  |
| G                                   | 2008.1 - 2013.4 | -7.37 <sup>b</sup> (-12.47 ; -1.96)  |                 |                                      |                 |                                     |                 |                                      |                 |                                     | -7.37 <sup>b</sup> (-12.47 ; -1.96)  |
| <b>Ex-smokers relapse incidence</b> |                 |                                      |                 |                                      |                 |                                     |                 |                                      |                 |                                     |                                      |
| F                                   | 2008.1 - 2012.3 | -8.62 <sup>d</sup> (-18.97 ; 3.05)   | 2012.3 - 2013.4 | 163.01 <sup>a</sup> (60.46 ; 331.10) |                 |                                     |                 |                                      |                 |                                     | 14.99 <sup>c</sup> (0.62 ; 31.41)    |
| M                                   | 2008.1 - 2009.3 | -47.87 <sup>d</sup> (-82.66 ; 56.76) | 2009.3 - 2010.2 | 118.99 <sup>d</sup> (-100 ; 1329577) | 2010.2 - 2012.3 | -27.30 <sup>d</sup> (-49.13 ; 3.88) | 2012.3 - 2013.2 | 527.0 <sup>d</sup> (-75.9 ; 16209.4) | 2013.2 - 2013.4 | 74.88 <sup>d</sup> (-70.67 ; 942.8) | 10.03 <sup>d</sup> (-62.75 ; 225.05) |
| G                                   | 2008.1 - 2012.3 | -7.94 <sup>d</sup> (-16.33 ; 1.30)   | 2012.3 - 2013.4 | 198.72 <sup>a</sup> (116.0 ; 313.1)  |                 |                                     |                 |                                      |                 |                                     | 18.91 <sup>a</sup> (8.01 ; 30.90)    |

Note: 2008.\*. represents the trimester \* of the year 2008

APC, annual percentage change and AAPC, average annual percent change estimated by joinpoint regression analysis; CI, confidence interval; F, female; G, global; M, male.

<sup>a</sup> p ≤ 0.001; <sup>b</sup> p ≤ 0.01; <sup>c</sup> p ≤ 0.05; <sup>d</sup> p > 0.05

**Table 3. Trends in prevalence of smoking status and incidence of new smokers, ex-smokers and ex-smoker relapse. Jointpoints overall and by sex in NAVARRE. N=73,644 (2008-2013)**

|                                    | Trend 1         |                                      | Trend 2         |                                    | Trend 3         |                                    | Trend 4         |                                   | Trend 5         |                                   | AAPC (95% CI)<br>2008.1 - 2013.4     |
|------------------------------------|-----------------|--------------------------------------|-----------------|------------------------------------|-----------------|------------------------------------|-----------------|-----------------------------------|-----------------|-----------------------------------|--------------------------------------|
|                                    | Time            | APC (95% IC)                         | Time            | APC (95% IC)                       | Time            | APC (95% IC)                       | Time            | APC (95% IC)                      | Time            | APC (95% IC)                      |                                      |
| <b>Smoker prevalence</b>           |                 |                                      |                 |                                    |                 |                                    |                 |                                   |                 |                                   |                                      |
| F                                  | 2008.1 - 2010.3 | -0.95 <sup>a</sup> (-1.23 ; -0.67)   | 2010.3 - 2011.2 | -2.39 <sup>d</sup> (-6.56 ; 1.96)  | 2011.2 - 2013.4 | -0.22 <sup>d</sup> (-0.51 ; 0.08)  |                 |                                   |                 |                                   | -0.82 <sup>b</sup> (-1.36 ; -0.28)   |
| M                                  | 2008.1 - 2013.4 | -1.95 <sup>a</sup> (-2.06 ; -1.84)   |                 |                                    |                 |                                    |                 |                                   |                 |                                   | -1.95 <sup>a</sup> (-2.06 ; -1.84)   |
| G                                  | 2008.1 - 2011.3 | -1.69 <sup>a</sup> (-1.90 ; -1.48)   | 2011.3 - 2013.4 | -0.95 <sup>a</sup> (-1.39 ; -0.52) |                 |                                    |                 |                                   |                 |                                   | -1.40 <sup>a</sup> (-1.60 ; -1.20)   |
| <b>Ex-smoker prevalence</b>        |                 |                                      |                 |                                    |                 |                                    |                 |                                   |                 |                                   |                                      |
| F                                  | 2008.1 - 2008.3 | 41.34 <sup>a</sup> (25.34 ; 59.38)   | 2008.3 - 2010.2 | 19.33 <sup>a</sup> (17.20 ; 21.50) | 2010.2 - 2011.3 | 13.11 <sup>a</sup> (9.64 ; 16.70)  | 2011.3 - 2012.2 | 20.16 <sup>b</sup> (9.28 ; 32.12) | 2012.2 - 2013.4 | 10.28 <sup>a</sup> (8.87 ; 11.72) | 17.37 <sup>a</sup> (15.50 ; 19.26)   |
| M                                  | 2008.1 - 2008.3 | 34.19 <sup>a</sup> (16.08 ; 55.11)   | 2008.3 - 2009.4 | 19.48 <sup>a</sup> (14.38 ; 24.80) | 2009.4 - 2012.4 | 13.63 <sup>a</sup> (12.85 ; 14.41) | 2012.4 - 2013.4 | 9.63 <sup>a</sup> (6.53 ; 12.81)  |                 |                                   | 15.82 <sup>a</sup> (14.08 ; 17.60)   |
| G                                  | 2008.1 - 2008.3 | 36.52 <sup>a</sup> (17.15 ; 59.08)   | 2008.3 - 2009.4 | 20.06 <sup>a</sup> (14.63 ; 25.75) | 2009.4 - 2012.4 | 14.66 <sup>a</sup> (13.80 ; 15.52) | 2012.4 - 2013.4 | 9.66 <sup>a</sup> (6.27 ; 13.16)  |                 |                                   | 16.67 <sup>a</sup> (14.81 ; 18.57)   |
| <b>New smokers incidence</b>       |                 |                                      |                 |                                    |                 |                                    |                 |                                   |                 |                                   |                                      |
| F                                  | 2008.1 - 2013.4 | -9.43 <sup>b</sup> (-15.71 ; -2.68)  |                 |                                    |                 |                                    |                 |                                   |                 |                                   | -9.43 <sup>b</sup> (-15.71 ; -2.68)  |
| M                                  | 2008.1 - 2013.4 | -9.38 <sup>b</sup> (-15.04 ; -3.35)  |                 |                                    |                 |                                    |                 |                                   |                 |                                   | -9.38 <sup>b</sup> (-15.04 ; -3.35)  |
| G                                  | 2008.1 - 2013.4 | -9.44 <sup>b</sup> (-14.84 ; -3.68)  |                 |                                    |                 |                                    |                 |                                   |                 |                                   | -9.44 <sup>b</sup> (-14.84 ; -3.68)  |
| <b>New ex-smokers incidence</b>    |                 |                                      |                 |                                    |                 |                                    |                 |                                   |                 |                                   |                                      |
| F                                  | 2008.1 - 2013.4 | -9.66 <sup>b</sup> (-14.86 ; -4.14)  |                 |                                    |                 |                                    |                 |                                   |                 |                                   | -9.66 <sup>b</sup> (-14.86 ; -4.14)  |
| M                                  | 2008.1 - 2013.4 | -2.68 <sup>d</sup> (-9.12 ; 4.22)    |                 |                                    |                 |                                    |                 |                                   |                 |                                   | -2.68 <sup>d</sup> (-9.12 ; 4.22)    |
| G                                  | 2008.1 - 2013.4 | -5.00 <sup>d</sup> (-10.75 ; 1.11)   |                 |                                    |                 |                                    |                 |                                   |                 |                                   | -5.00 <sup>d</sup> (-10.75 ; 1.11)   |
| <b>Ex-smoker relapse incidence</b> |                 |                                      |                 |                                    |                 |                                    |                 |                                   |                 |                                   |                                      |
| F                                  | 2008.1 - 2013.4 | -13.88 <sup>a</sup> (-19.74 ; -7.61) |                 |                                    |                 |                                    |                 |                                   |                 |                                   | -13.88 <sup>a</sup> (-19.74 ; -7.61) |
| M                                  | 2008.1 - 2013.4 | -12.03 <sup>c</sup> (-20.16 ; -3.06) |                 |                                    |                 |                                    |                 |                                   |                 |                                   | -12.03 <sup>c</sup> (-20.16 ; -3.06) |
| G                                  | 2008.1 - 2013.4 | -11.37 <sup>a</sup> (-17.23 ; -5.09) |                 |                                    |                 |                                    |                 |                                   |                 |                                   | -11.37 <sup>a</sup> (-17.23 ; -5.09) |

Note: 2008.\*. represents the trimester \* of the year 2008

APC, annual percentage change and AAPC, average annual percent change estimated by joinpoint regression analysis; CI, confidence interval; F, female; G, global; M, male.

<sup>a</sup> p≤ 0.001; <sup>b</sup> p≤ 0.01; <sup>c</sup> p≤ 0.05; <sup>d</sup> p>0.05

**Table 4. Trends in prevalence of smoking status and incidence of new smokers, ex-smokers and ex-smoker relapse. Jointpoints overall and by sex in THE BALEARIC ISLANDS. N=178,251 (2010-2013)**

|                                     | Trend 1         |                                       | Trend 2         |                                       | Trend 3         |                                    | AAPC (95% IC)<br>2008.1 - 2013.4      |
|-------------------------------------|-----------------|---------------------------------------|-----------------|---------------------------------------|-----------------|------------------------------------|---------------------------------------|
|                                     | Time            | APC (95% IC)                          | Time            | APC (95% IC)                          | Time            | APC (95% IC)                       |                                       |
| <b>Smoker prevalence</b>            |                 |                                       |                 |                                       |                 |                                    |                                       |
| F                                   | 2010.2 - 2013.4 | -1.20 <sup>a</sup> (-1.40 ; -1.01)    |                 |                                       |                 |                                    | -1.20 <sup>a</sup> (-1.40 ; -1.01)    |
| M                                   | 2010.2 - 2011.1 | -2.11 <sup>a</sup> (-2.59 ; -1.63)    | 2011.1 - 2012.3 | -3.06 <sup>a</sup> (-3.29 ; -2.83)    | 2012.3 - 2013.4 | -1.48 <sup>a</sup> (-1.74 ; -1.22) | -2.29 <sup>a</sup> (-2.43 ; -2.15)    |
| G                                   | 2010.2 - 2012.4 | -2.11 <sup>a</sup> (-2.31 ; -1.91)    | 2012.4 - 2013.4 | -0.86 <sup>d</sup> (-1.87 ; 0.17)     |                 |                                    | -1.75 <sup>a</sup> (-2.04 ; -1.47)    |
| <b>Exsmoker prevalence</b>          |                 |                                       |                 |                                       |                 |                                    |                                       |
| F                                   | 2010.2 - 2012.2 | 24.88 <sup>a</sup> (24.10 ; 25.66)    | 2012.2 - 2013.4 | 12.03 <sup>a</sup> (11.11 ; 12.95)    |                 |                                    | 19.20 <sup>a</sup> (18.67 ; 19.72)    |
| M                                   | 2010.2 - 2012.2 | 15.87 <sup>a</sup> (14.59 ; 17.17)    | 2012.2 - 2013.4 | 7.28 <sup>a</sup> (5.69 ; 8.89)       |                 |                                    | 12.11 <sup>a</sup> (11.22 ; 13.00)    |
| G                                   | 2010.2 - 2012.2 | 19.35 <sup>a</sup> (18.76 ; 19.93)    | 2012.2 - 2013.4 | 9.27 <sup>a</sup> (8.56 ; 9.99)       |                 |                                    | 14.92 <sup>a</sup> (14.52 ; 15.32)    |
| <b>New smokers incidence</b>        |                 |                                       |                 |                                       |                 |                                    |                                       |
| F                                   | 2010.2 - 2012.4 | -44.30 <sup>b</sup> (-61.99 ; -18.40) | 2012.4 - 2013.4 | 1236.9 <sup>c</sup> (98.1 ; 8922.6)   |                 |                                    | 38.10 <sup>d</sup> (-19.25 ; 136.16)  |
| M                                   | 2010.2 - 2012.4 | -45.84 <sup>a</sup> (-59.81 ; -27.01) | 2012.4 - 2013.4 | 702.68 <sup>a</sup> (187.6 ; 2140.5)  |                 |                                    | 17.00 <sup>d</sup> (-14.94 ; 60.95)   |
| G                                   | 2010.2 - 2012.4 | -45.95 <sup>a</sup> (-60.61 ; -25.84) | 2012.4 - 2013.4 | 1036.5 <sup>b</sup> (207.5 ; 4098.1)  |                 |                                    | 29.03 <sup>d</sup> (-12.11 ; 89.42)   |
| <b>New exsmokers incidence</b>      |                 |                                       |                 |                                       |                 |                                    |                                       |
| F                                   | 2010.2 - 2013.4 | -11.19 <sup>c</sup> (-20.15 ; -1.22)  |                 |                                       |                 |                                    | -11.19 <sup>c</sup> (-20.15 ; -1.22)  |
| M                                   | 2010.2 - 2013.4 | -12.06 <sup>c</sup> (-18.59 ; -5.02)  |                 |                                       |                 |                                    | -12.06 <sup>c</sup> (-18.59 ; -5.02)  |
| G                                   | 2010.2 - 2013.4 | -11.72 <sup>b</sup> (-18.15 ; -4.78)  |                 |                                       |                 |                                    | -11.72 <sup>b</sup> (-18.15 ; -4.78)  |
| <b>Ex-smokers relapse incidence</b> |                 |                                       |                 |                                       |                 |                                    |                                       |
| F                                   | 2010.2 - 2013.4 | -32.20 <sup>a</sup> (-41.27 ; -21.73) |                 |                                       |                 |                                    | -32.20 <sup>a</sup> (-41.27 ; -21.73) |
| M                                   | 2010.2 - 2013.4 | -36.50 <sup>a</sup> (-44.95 ; -26.75) |                 |                                       |                 |                                    | -36.50 <sup>a</sup> (-44.95 ; -26.75) |
| G                                   | 2010.2 - 2013.1 | -18.41 <sup>c</sup> (-30.28 ; -4.52)  | 2013.1 - 2013.4 | -85.36 <sup>d</sup> (-99.52 ; 347.65) |                 |                                    | -43.54 <sup>d</sup> (-70.63 ; 8.57)   |

Note: 2010.\*. represents the quarter \* of the year 2010

APC, annual percentage change and AAPC, average annual percent change estimated by joinpoint regression analysis; CI, confidence interval; F, female; G, global; M, male.

<sup>a</sup> p≤ 0.001; <sup>b</sup> p≤ 0.01; <sup>c</sup> p≤ 0.05; <sup>d</sup> p>0.05

## DISCUSSION

The previous implementation of the partial Spanish SFL could account for the low effectiveness of the comprehensive SFL observed in this study. A significant downward trend of smoker prevalence rates, higher in men than in women, was found in the three regions throughout the study period. Correspondingly, the trend of ex-smoker prevalence rates increased in the three regions, particularly in Navarre and during the period 2008.1-2008.3 in Catalonia and Navarre, and the period 2010.2-2012.2 in the Balearic Islands. Even though the standardized ex-smoker prevalence rate was higher for men, the increase in the trend of ex-smoker prevalence rate was higher in women in the three regions. The overall trends of new smoker incidence rates decreased significantly in Catalonia and Navarre and were similar for men and women. Also, the overall trends of new ex-smokers decreased significantly in Catalonia and the Balearic Islands, particularly for men. In addition, the overall trends of ex-smoker relapse increased in Catalonia and decreased in Navarre, more for women than for men in both cases.

The trends of smoker prevalence declined throughout the study and no changes were observed after the implementation of the comprehensive SFL. Indeed, the most significant decrease begins in 2010 in Catalonia (3<sup>rd</sup> quarter) and the Balearic Islands and in 2008 in Navarre, prior to the implementation of the comprehensive SFL (January 1, 2011). However, the trend in Catalonia shows a drop in the prevalence rate of smokers around the time of the implementation of the Law. In contrast, trends in Navarre and the Balearic Islands show a more progressive decline. Comparisons are difficult due to the lack of studies on smoking prevalence and incidence from a PHC perspective and because some studies evaluate the impact of SFL on smoking prevalence with surveys that use different methodologies. Two studies that analysed data from surveys to the general population<sup>19,20</sup> did not find a significant decrease in the prevalence of smokers after the Spanish comprehensive law. In contrast, Lidón *et al.*<sup>24</sup> showed that after the implementation of both Spanish SFL, a significant decrease was observed in the smoking prevalence (from 34.5% to 26.1%, Prevalence Ratio = 0.76,  $p < 0.001$ ) of people 16 years of age and older living in Barcelona surveyed in 2004–2005 and followed-up in 2013–2014. In addition, National Health Survey data from the 1987–2005 period revealed an annual average absolute decline of 1.0% in the prevalence of male smokers, whereas women showed an annual average absolute increase in prevalence of 0.2%. Between 2006 and 2014, the prevalence of smokers declined annually by 0.7% in men and 0.5% in women.<sup>23</sup> Although the values of the current study are higher, the steeper decline in the prevalence of smokers in men agree with these data.<sup>23</sup> Also, one study that estimated the effect of the Spanish SFL for the 2012–2025 period predicted a decrease in smoking prevalence in all age groups and for both sexes, except for women aged 40–64.<sup>30</sup>

Concomitantly with the decline in the prevalence trends in smokers, a constant increase of prevalence trends in ex-smokers was observed in the three regions. Other studies failed to note a significant change in the prevalence of ex-smokers after the comprehensive SFL: a difference of only 0.3 % between 2007 and 2011<sup>20</sup> and a non-significant increase of 3.3% between 2006 and 2011.<sup>19</sup> In agreement with a recent evidence review,<sup>23</sup> we observed a higher increase in the trend of ex-smokers prevalence in women. This review showed that the rate of smoking cessation in men increased 0.9% annually during the 1987–2014 period, and 1.5% in women after the Partial SFL came into force. The later incorporation of women to smoking might explain these gender differences. We should underscore that other

1  
2  
3 studies that use health surveys as information source have a higher prevalence of ex-smokers than the prevalence we  
4 obtained in this study, especially for Navarre and the Balearic Islands.<sup>31</sup> This discrepancy could be explained by the  
5 misclassification of long-term ex-smokers as non-smokers during the process of computerization of medical records in  
6 the cases where the smoking habit was not sufficiently investigated.<sup>32</sup>  
7  
8  
9

10 We observed a gradual decline in the new smoker incidence trends in Catalonia and Navarre throughout the study  
11 period, whereas incidence trends remained stable in the Balearic Islands (possibly due to the shorter study period or  
12 lower rates). A review by Wilson *et al.*<sup>33</sup> of two studies that evaluated smoking initiation reported mixed results, while  
13 Guerrero *et al.*<sup>34</sup> concluded that the Spanish partial SFL had no effect on new smokers in 2009. In contrast, Pinilla and  
14 Abásolo<sup>35</sup> observed a 6% decrease in the rate of smoking initiation among young people after the implementation of  
15 the same law, with a more positive impact in higher socioeconomic strata. We have not found studies that evaluate the  
16 impact of the comprehensive SFL on the incidence of new smokers. However, our data show a continuation in the trend  
17 observed in Pinilla's study<sup>35</sup> on the impact of the partial law.  
18  
19  
20  
21  
22

23 The incidence trend in new ex-smokers declined gradually throughout the study period in Catalonia and the Balearic  
24 Islands. While the literature to date lacks data on the effect of the SFL on the incidence of new ex-smokers, it provides  
25 some information on prevalence. In this respect, one study on the Spanish partial SFL observed an increase of 8%  
26 between 2006 and 2011 in the rate of cessation among adult smokers (age 21 years and older) according to data from  
27 the National Health Survey.<sup>35</sup> In Luxembourg, smoking cessation attributed to the SFL was higher among daily smokers  
28 with a higher socioeconomic status.<sup>8</sup> In our cohort, we observed apparent random increases and declines in the  
29 adjusted rates in the three regions throughout the study.  
30  
31  
32  
33

34 The incidence trend in ex-smoker relapses increased in Catalonia and declined in Navarre constantly throughout the  
35 whole period, particularly for women, but the overall trend remained stable in the Balearic islands (most likely because  
36 of the shorter study period). However, the literature presents conflicting results regarding smoking relapse. One study  
37 on the partial Spanish SFL observed that most people who had succeeded in giving up smoking in 2006 had not relapsed  
38 by 2009.<sup>34</sup> On the other hand, a quasi-experimental study conducted in the United States observed that relapse was  
39 similar between employees in workplaces with SFL and employees where smoking was permitted.<sup>36</sup> In contrast, Shang  
40 found that a comprehensive SFL in bars significantly deters smoking relapse among people ages 21 and older.<sup>37</sup>  
41 According to Buczkowski *et al.*,<sup>38</sup> the main reasons for relapse are stress, missing the pleasure obtained from smoking  
42 and the smoking environment. Other factors not analysed in our study that might influence relapse rates could explain  
43 the variations between regions, for instance living with other smokers, being enrolled in work or clinics cessation  
44 programmes<sup>39</sup> or the region-specific complementary measures to the SFL (for instance, Foral Law 6/2003,<sup>40</sup> February  
45 14, of smoking prevention, protection from secondhand tobacco smoke and promotion of health with regard to  
46 smoking in Navarre). In addition, we should consider the impact of the financial crisis during the study period and the  
47 subsequent increase of anxiety and depression in the population.<sup>41</sup> In this respect, Navarre was the region with the  
48 lowest unemployment rate in Spain according to the 2010 Economically Active Population Survey (unemployment of  
49 11.6% in Navarre, versus 18.0% in Catalonia and 22.2% in the Balearic Islands). According to the 2009 European Health  
50  
51  
52  
53  
54  
55  
56  
57  
58  
59  
60

1  
2  
3 Survey in Spain, these unemployment figures correlate with the prevalence of chronic depression, which was of 3.4% in  
4 Navarre versus 5.4% in Catalonia and 7.0% in the Balearic Islands.  
5  
6

7 The SFL is a keystone of the WHO Framework Convention on Tobacco Control (FCTC) and the MPOWER policy package  
8 (M=Monitor; P=Protect; O=Offer; W=Warm; E=Enforce; R= Raise).<sup>42</sup> The enforcement of Laws 28/2005 and 42/2010  
9 have significantly advanced smoking control in Spain, in particular the “Protect people from tobacco” strategy.  
10 However, the remaining MPOWER strategies have been patchily implemented and require further development.<sup>23</sup> On  
11 balance, a combination of specific, feasible, pragmatic, sufficiently funded policies and interventions aimed at  
12 populations and individuals is essential to achieve progress regarding smoking behaviour.  
13  
14  
15

### 16 17 **Limitations and strengths of the study**

18 It is important to take into account that other than the Law, the pattern of tobacco consumption is influenced by  
19 factors such as health interventions, level of education, age, civil status, having children and being unemployed.<sup>43</sup>  
20 However, this study only considered age, sex, number of health problems and number of PHC visits since other  
21 variables were not available. In addition, many patients were excluded from the study because of lack of baseline data  
22 on smoking (missing data is a common problem in studies based on EHR). In order to prevent bias caused by improved  
23 smoking records, we excluded the cases with no information at the beginning of the study. The selection criteria and  
24 the longitudinal design aimed to maximize the internal validity of the study. Moreover, young people might be  
25 underrepresented due to their lower use of PHC services. On the other hand, 70% of the population attends PHC  
26 services at least once a year and smokers attend more frequently than no smokers.<sup>44</sup> In view of the limited length of the  
27 study period, particularly in the Balearic Islands, we consider these results a first approximation to be succeeded by  
28 follow-up research. We should underscore that rather than just comparing two different periods, joinpoint analysis  
29 evaluates longitudinal trends, thus producing a more accurate assessment. The following characteristics of the study  
30 were taken into consideration: scarcity of data prior to the implementation of the SFL; delayed changes in smoking  
31 status; possibility of detecting more than one change in smoking trends; and influence of unanticipated factors. While  
32 other statistical models could have been used, we believe that joinpoint is a suitable method to achieve the study  
33 objectives, as shown in previous studies.<sup>45-47</sup>  
34  
35  
36  
37  
38  
39  
40  
41  
42

43 This study provides useful data on the impact of the Spanish comprehensive SFL on adult smoking behaviour in PHC  
44 patients. It is crucial to analyse the consequences of a public health law on PHC users. Primary health care has a pivotal  
45 role in smoking cessation because it is the gatekeeper of the health services, it is accessible and provides continuity of  
46 care to smokers.<sup>48</sup> We should also highlight that this study includes the evaluation of novel variables such as incidence  
47 of new smokers, new ex-smokers and ex-smoker relapse, which we consider of great relevance in relation to PHC  
48 interventions for smoking cessation. Used as a research tool, EHR portray real-life conditions and provide  
49 comprehensive, long-term health histories from a large population sample, ensure high representativeness and  
50 external validity and minimize potential recall bias. The results are only generalizable to PHC users. To our knowledge,  
51 this study is amongst the first to show quarterly data from EHR.  
52  
53  
54  
55  
56  
57  
58  
59  
60

## CONCLUSIONS

The introduction of the Spanish comprehensive SFL (Law 42/2010) does not significantly modify incidence and prevalence trends of smoking behaviour in PHC adult patients in Catalonia, Navarre and the Balearic Islands. The impact of the comprehensive SFL might have been lessened by the effect of the previous implementation of the partial SFL (Law 28/2005). The current article provides baseline data for future research into the effectiveness of this Law. In addition to specific factors associated with smoking behaviour (such as the price of a pack of cigarettes or funding of smoking cessation services), future studies should consider socio-economic status and age groups.

**Acknowledgements:** We thank all professionals of the 66 PHC teams who volunteered to participate in the study. The authors would also like to thank Josep M Elorza-Ricart, Magdalena Rosell-Murphy, Lluís Martínez, Javier Baquedano, Javier Arranz, M<sup>a</sup> Ángeles Nuin and Carlos Martín-Cantera for their collaboration. Also Eulàlia Farré for the English translation. This article forms part of the doctoral dissertation of Yolanda Rando-Matos at the Universitat Autònoma de Barcelona (Department of Medicine of the Autonomous University of Barcelona).

**Contributors:** BB, TRB, MPV, JBM, and CVF designed the study and wrote the protocol. YRM, MPV and JBM conducted literature searches and provided summaries of previous research studies. BB, JLL, JM, JR and MPV obtained the data. TRB and TLJ conducted the statistical analysis. All authors contributed to the interpretation of the results. YRM and MPV wrote the first draft of the manuscript. All authors read, contributed and approved the final version of the manuscript.

**Funding:** This project has been funded by the Carlos III Health Institute (Ministry of Economy and Competitiveness, Spain) with a grant for research projects on health (PI11/01413) through the Network for Prevention and Health Promotion in Primary Care (rediAPP, RD12/0005/0001; RD16/0007/0001), and by European Union ERDF funds. The funder had no role in the study design, collection, analysis or interpretation of the data, writing of the manuscript, or the decision to submit the paper for publication.

**Competing interest:** The authors declare no conflict of interest.

**Ethical aspects:** This study follows the tenets of the Helsinki Declaration and of Good Clinical Research Practice and has been approved by the Ethical and Clinical Research Committee of the IDIAP Jordi Gol. Confidentiality was guaranteed through data encryption and anonymization in agreement with the data confidentiality Law 15/1999.

**Data sharing statement:** No additional data are available.

**Figure 1: Flow-chart of patients included in the study, by region.**

## REFERENCES

1. Jha P. Avoidable global cancer deaths and total deaths from smoking. *Nat Rev Cancer* 2009;9:655–64.
2. Murray CJL, Lopez AD. Alternative projections of mortality and disability by cause 1990–2020: Global Burden of Disease Study. *Lancet* 2017;349:1498–504.
3. World Health Organization, and Tobacco Free Initiative. Building blocks to tobacco control: a hand-book. (Tools for advancing tobacco control in the 21st century). Geneva: WHO; 2004.
4. Federico B, Mackenbach JP, Eikemo TA, *et al*. Impact of the 2005 smoke-free policy in Italy on prevalence, cessation and intensity of smoking in the overall population and by educational group. *Addiction* 2012;107:1677–86.
5. Hahn EJ, Rayens MK, Butler KM, *et al*. Smoke-free laws and adult smoking prevalence. *Prev Med* 2008;47:206–9.
6. Nagelhout GE, Willemsen MC, de Vries H. The population impact of smoke-free workplace and hospitality industry legislation on smoking behaviour. Findings from a national population survey. *Addiction* 2011;106:816–23.
7. Hublet A, Schmid H, Clays E, *et al*. Association between tobacco control policies and smoking behaviour among adolescents in 29 European countries. *Addiction* 2009;104:1918–26.
8. Tchicaya A, Lorentz N, Demarest S. Socioeconomic inequalities in smoking and smoking cessation due to a smoking ban: General population-based cross-sectional study in Luxembourg. *PLoS One* 2016;11:1–15.
9. Ye X, Chen S, Yao Z, *et al*. Smoking behaviors before and after implementation of a smoke-free legislation in Guangzhou, China. *BMC Public Health* 2015;15:982.
10. Fichtenberg CM, Glantz SA. Effect of smoke-free workplace on smoking behaviour: systematic review. *BMJ* 2002;325:188.
11. Frazer K, Callinan JE, McHugh J, *et al*. Legislative smoking bans for reducing harms from secondhand smoke exposure, smoking prevalence and tobacco consumption. *Cochrane database Syst Rev* 2016;2:CD005992.
12. Ley de medidas sanitarias frente al tabaquismo y reguladora de la venta, el suministro y la publicidad de los productos del tabaco. L. N. 28/2005 (27 diciembre 2005). Available at: <https://www.boe.es/buscar/doc.php?id=BOE-A-2005-21261> . Accessed 6-3-2017.
13. Nebot M, Fernández E, (Coords) Evaluación del impacto de la ley de medidas sanitarias frente al tabaquismo. Grupo de Trabajo en Tabaquismo de la Sociedad Española de Epidemiología. Barcelona: Sociedad Española de Epidemiología y Ministerio de Sanidad y Política Social, 9-43. 2009. Available in: URL: <http://www.seepidemiologia.es/documents/dummy/Monografia-Grupo%20Trabajo%20sobre%20tabaquismo.pdf>
14. Cordoba R, Villalbi JR, Salvador-Llivina T, *et al*. El proceso en España de la adopción de una legislación eficaz para la prevención del tabaquismo [Spain's process of passing effective smoking prevention legislation]. *Rev Esp Salud Publica* 2006;80:631–45.
15. Nebot M, López MJ, Ariza C, Pérez-Ríos M, *et al*. Impact of the Spanish smoking law on exposure to secondhand smoke in offices and hospitality venues: Before-and-after study. *Environ Health Perspect* 2009;117:344–7.
16. Ley de medidas sanitarias frente al tabaquismo y reguladora de la venta, el suministro y la publicidad de los productos del tabaco (30 December 2010), por la que se modifica la Ley 28/2005, de 26 de diciembre, de medidas sanitarias frente al tabaquismo y reguladora de la venta, el suministro, el consumo y la publicidad de los productos del tabaco. Boletín Oficial del Estado (Spanish Official State Bulletin). L. N. 42/2010.No. 318. Available at: <https://www.boe.es/buscar/act.php?id=BOE-A-2010-20138> . Accessed 6-3-2017.
17. Regidor E, de Mateo S, Ronda E, *et al*. Heterogeneous trend in smoking prevalence by sex and age group following the implementation of a national smoke-free law. *J Epidemiol Community Health* 2011;65:702–8.
18. Regidor E, Pascual C, Giráldez-García C, *et al*. Impact of tobacco prices and smoke-free policy on smoking cessation, by gender and educational group: Spain, 1993–2012. *Int J Drug Policy* 2015;26:1215–21.
19. Perez-Rios M, Fernandez E, Schiaffino A, *et al*. Changes in the prevalence of tobacco consumption and the profile of Spanish smokers after a comprehensive smoke-free policy. *PLoS One* 2015;10:1–9.
20. Jiménez Ruiz CA, Riesco Miranda JA, Altet Gómez N, *et al*. Impact of legislation on passive smoking in Spain. *Respiration* 2014;87:190–5.
21. Catalina Romero C, Gelpi Médez JA, Cortés Arcas MV, *et al*. Evolución en España del consumo de tabaco en población trabajadora desde la entrada en vigor de la Ley 28/2005 de medidas sanitarias frente al tabaquismo [Prevalence of Tobacco Consumption Among Working Population after the Law 42/2010, Spain]. *Rev Esp salud pública* 2010;84:223–7.
22. Catalina Romero C, Sainz Gutiérrez JC, Quevedo Aguado L, *et al*. Prevalencia de consumo de tabaco en población trabajadora tras la entrada en vigor de la Ley 42/2010 [Prevalence of tobacco consumption among working population after the law 42/2010, Spain]. *Rev Esp Salud Publica* 2012;86:177–88.
23. Pérez-Ríos M, Galán I(editors) Evaluación de las políticas de control del tabaquismo en España (Leyes 28/2005 y



- 42/2010) Revisión de la evidencia. Grupo de Trabajo en Tabaquismo de la Sociedad Española de Epidemiología. Barcelona: Sociedad Española de Epidemiología y Ministerio de Sanidad y Política Social, 2017;11-74. Available in: URL: <http://www.seepidemiologia.es/documents/dummy/V9.0%2520-%2520Libro%2520Tabaquismo%25202017%2520-%2520Abierto%2520Final.pdf>
24. Lidón-moyano C, Fu M, Ballbè M, *et al.* Addictive Behaviors Impact of the Spanish smoking laws on tobacco consumption and secondhand smoke exposure : A longitudinal population study. *Addict Behav* 2017;75:30–5.
25. Bauzà-Amengual M, Blasco-González M, Sánchez-Vazquez E, *et al.* Impacto de la Ley del tabaco en el lugar de trabajo: estudio de seguimiento de una cohorte de trabajadores en España 2005–07 [Impact of the Tobacco Law on the workplace: a follow up study of a cohort of workers in Spain 2005–2007]. *Atención primaria* 2010;42:309–13.
26. Bolívar B, Pareja C, Astier-Peña MP, *et al.* Variability in the performance of preventive services and in the degree of control of identified health problems: a primary care study protocol. *BMC Public Health* 2008;8:281.
27. The International Statistical Classification of Diseases and Related Health Problems (ICD-10th revision) classification of mental and behavioural disorders: clinical descriptions and diagnostic guidelines. Geneva: World Health Organization, 1992. Available at: <http://www.who.int/classifications/icd/en/bluebook.pdf> . Accessed 6-3-2017..
28. Okkes IM, Becker HW, Bernstein RM, *et al.* The March 2002 update of the electronic version of ICPC-2. A step forward to the use of ICD-10 as a nomenclature and a terminology for ICPC-2. *Fam Pract* 2002;19:543–6.
29. Kim H-J, Fay MP, Feuer EJ, *et al.* Permutation tests for joinpoint regression with applications to cancer rates. *Stat Med* 2000;19:335–51. Available at: [http://onlinelibrary.wiley.com/doi/10.1002/\(SICI\)1097-0258\(20000215\)19:3%253C335::AID-SIM336%253E3.0.CO;2-Z/abstract](http://onlinelibrary.wiley.com/doi/10.1002/(SICI)1097-0258(20000215)19:3%253C335::AID-SIM336%253E3.0.CO;2-Z/abstract) . Accessed 8-3-2017.
30. Martín-Sánchez JC, Martínez-Sánchez JM, Bilal U, *et al.* Sex and Age Specific Projections of Smoking Prevalence in Spain: A Bayesian Approach. *Nicotine Tob Res* 2017; ntx120, <https://doi.org/10.1093/ntr/ntx120>.
31. Ministerio de Sanidad Servicios Sociales e Igualdad. Encuesta Europea de Salud en España: Determinantes de salud [Internet]. 2014. Available from: <http://www.msssi.gob.es/estadEstudios/estadisticas/EncuestaEuropea/pdf/MODULO3RELATIVOweb.pdf>
32. Ramos R, Balló E, Marrugat J, *et al.* Validity for Use in Research on Vascular Diseases of the SIDIAP (Information System for the Development of Research in Primary Care): the EMMA Study. *Rev Española Cardiol (English Ed [Internet].* 2012;65:29–37. Available from: <http://www.revespcardiol.org/en/validity-for-use-in-research/articulo/90072112/> Accessed 25-5-2018.
33. Wilson LM, Avila Tang E, Chander G, *et al.* Impact of tobacco control interventions on smoking initiation, cessation, and prevalence: A systematic review. *J Environ Public Health* 2012; doi:10.1155/2012/961724
34. Guerrero F, Santonja F-J, Villanueva R-J. Analysing the Spanish smoke-free legislation of 2006: a new method to quantify its impact using a dynamic model. *Int J Drug Policy* 2011 Jul;22:247–51.
35. Pinilla J, Abásole I. The effect of policies regulating tobacco consumption on smoking initiation and cessation in Spain: is it equal across socioeconomic groups? *Tob Induc Dis* 2017;15:8.
36. Longo DR, Johnson JC, Kruse RL, *et al.* A prospective investigation of the impact of smoking bans on tobacco cessation and relapse. *Tob Control* 2001;10:267–72.
37. Shang C. The effect of smoke-free air law in bars on smoking initiation and relapse among teenagers and young adults. *Int J Environ Res Public Health* 2015;12:504–20.
38. Buczkowski K, Marcinowicz L, Czachowski S, *et al.* Motivations toward smoking cessation, reasons for relapse, and modes of quitting: results from a qualitative study among former and current smokers. *Patient Prefer Adherence* 2014;8:1353–63.
39. Schillo BA, Keller PA, Betzner AE, *et al.* Minnesota’s smokefree policies: Impact on cessation program participants. *Am J Prev Med* 2012;43:S171–8.
40. Ley foral 6/2003, de 14 de febrero, de prevención del consumo de tabaco, de protección del aire respirable y de la promoción de la salud en relación al tabaco (Navarra). Available at: <http://www.lexnavarra.navarra.es/detalle.asp?r=3323> . Accessed 31-7-2017
41. Gili M, García Campayo J, Roca M. Crisis económica y salud mental. Informe SESPAS 2014 [Economic crisis and mental health. SESPAS report 2014]. *Gac Sanit* 2014;28 Suppl 1:104–8.
42. World Health Organization. WHO report on the global tobacco epidemic, 2009: implementing smoke-free environments. Geneva: World Health Organization; 2009.
43. Buonanno P, Ranzani M. Thank you for not smoking: Evidence from the Italian smoking ban. *Health Policy* 2013;109:192–9.
44. Camarells Guillem F, Dalmau González-Gallarza R, Clemente Jiménez L, *et al.* Documento de consenso para la atención clínica al tabaquismo en España [Consensus report for the clinical care of smoking cessation in Spain]. *Med Clin* 2013;140:272.e1-272.e12.

- 1  
2  
3 45. Lopez-Campos JL, Ruiz-Ramos M, Fernandez E, *et al.* Recent lung cancer mortality trends in Europe: effect of  
4 national smoke-free legislation strengthening. *Eur J Cancer Prev.* 2017 Apr 4. doi:  
5 10.1097/CEJ.0000000000000354.  
6 46. Jan C, Lee M, Roa R, *et al.* The association of tobacco control policies and the risk of acute myocardial infarction  
7 using hospital admissions data. *PLoS One.* 2014;9(2). doi: 10.1371/journal.pone.0088784  
8 47. Rando-Matos Y, Pons-Vigués M, Rodríguez-Blanco T, *et al.* Effect of comprehensive smoke-free legislation on  
9 asthma and coronary disease trends in Spanish primary care patients. *Eur J Public Health* [Internet].  
10 2018;cky010. doi: 10.1093/eurpub/cky010.  
11 48. Córdoba R, Cabezas C, Camarelles F, *et al.* Recomendaciones sobre el estilo de vida. *Atención primaria*  
12 2012;44:16–22.  
13  
14  
15  
16  
17  
18  
19  
20  
21  
22  
23  
24  
25  
26  
27  
28  
29  
30  
31  
32  
33  
34  
35  
36  
37  
38  
39  
40  
41  
42  
43  
44  
45  
46  
47  
48  
49  
50  
51  
52  
53  
54  
55  
56  
57  
58  
59  
60

Figure 1: Flow-chart of patients included in the study, by region.

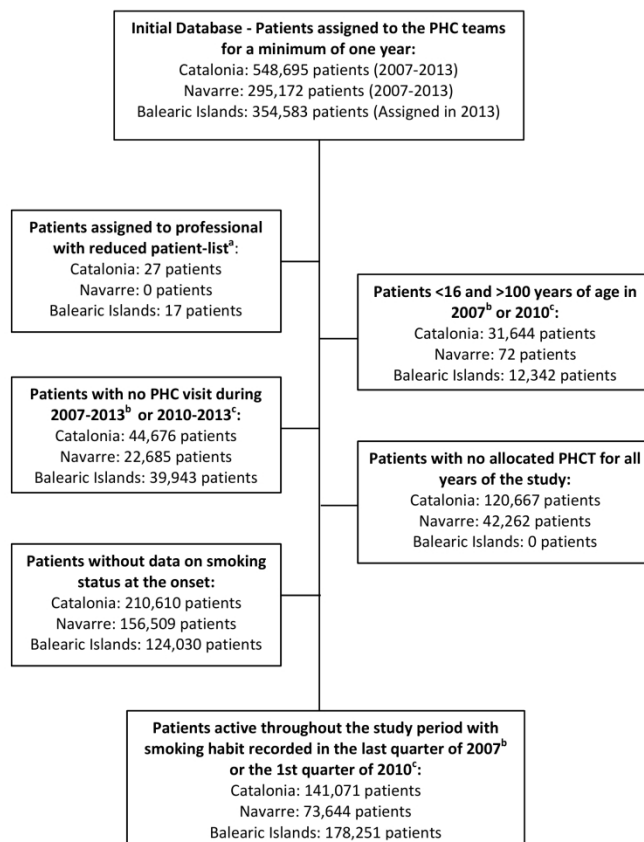

Patients belonged to 22 Primary Health Care Teams in each region  
<sup>a</sup> atypical patient-list <400 or >3000; GP with shorter patient lists were accepted if it was their first year in the Primary Health Care Team  
<sup>b</sup> In Catalonia or Navarre  
<sup>c</sup> In the Balearic Islands  
 PHC: Primary health care

Figure 1: Flow-chart of patients included in the study, by region.

209x297mm (300 x 300 DPI)

**SUPPLEMENTARY DATA FOR Effect of the comprehensive smoke-free law on time trends in smoking behaviour in Primary Health Care patients in Spain: a longitudinal observational study**

**Table S1: Information concerning smoking status in the electronic health records by region**

| Information from electronic health records                                     | Catalonia                                                                                         | Navarre                    | Balearic Islands       |
|--------------------------------------------------------------------------------|---------------------------------------------------------------------------------------------------|----------------------------|------------------------|
| Diagnostic codes related to smoking (with entry date)                          | Smoker: F17, F17.0, F17.1, F17.2, F17.5, F17.6, F17.7, F17.8, F17.9 in ICD-10<br>Ex-smoker: Z72.0 | Smoker: code P17 in ICPC-2 | Smoker: 305.1 in ICD-9 |
| Clinical variables related to smoking in the medical history (with entry date) | Smoking habit:<br>0: non-smoker.<br>1: smoker.<br>2: ex-smoker                                    |                            |                        |
|                                                                                | Number of cigarettes per day:<br>0 to 300                                                         |                            |                        |
|                                                                                | Smoking cessation advice:<br>1: yes<br>0: no                                                      |                            |                        |

Abbreviations: ICPC-2, International Classification of Primary Care, second edition; ICD-9 and 10, International Classification of Diseases, 9th and 10th revision.

**Table S2: Age-adjusted rates by direct method per 10,000 inhabitants based on the European Standard Population. CATALONIA N=141,071 (2008-2013).**

| Quarter | Smoking status prevalence |         |            | New smokers incidence | New ex-smokers incidence | Ex-smoker relapses incidence |
|---------|---------------------------|---------|------------|-----------------------|--------------------------|------------------------------|
|         | Non smokers               | Smokers | Ex-smokers |                       |                          |                              |
| 2008.1  | 4692.6                    | 4138.9  | 1168.5     | 20.8                  | 254.3                    | 226.9                        |
| 2008.2  | 4679.3                    | 4099.0  | 1221.7     | 21.4                  | 212.9                    | 151.4                        |
| 2008.3  | 4668.8                    | 4073.6  | 1257.6     | 16.6                  | 267.5                    | 218.5                        |
| 2008.4  | 4650.2                    | 4051.7  | 1298.1     | 26.1                  | 317.6                    | 100.4                        |
| 2009.1  | 4638.8                    | 4053.6  | 1307.6     | 25.2                  | 260.1                    | 128.6                        |
| 2009.2  | 4628.1                    | 4036.8  | 1335.1     | 15.8                  | 228.5                    | 78.3                         |
| 2009.3  | 4618.4                    | 4021.6  | 1360.0     | 12.7                  | 161.3                    | 113.7                        |
| 2009.4  | 4604.4                    | 3998.5  | 1397.2     | 19.6                  | 212.7                    | 165.6                        |
| 2010.1  | 4590.0                    | 4001.8  | 1408.2     | 19.0                  | 160.9                    | 123.1                        |
| 2010.2  | 4573.5                    | 3994.3  | 1432.2     | 26.4                  | 135.8                    | 148.8                        |
| 2010.3  | 4560.0                    | 3981.0  | 1459.0     | 20.8                  | 139.0                    | 100.5                        |
| 2010.4  | 4539.7                    | 3957.4  | 1503.0     | 26.8                  | 188.1                    | 112.5                        |
| 2011.1  | 4077.0                    | 3758.0  | 1510.3     | 15.1                  | 171.9                    | 103.2                        |
| 2011.2  | 4068.6                    | 3721.4  | 1555.3     | 12.4                  | 213.0                    | 90.0                         |
| 2011.3  | 4061.6                    | 3696.3  | 1587.3     | 13.0                  | 145.9                    | 81.4                         |
| 2011.4  | 4050.8                    | 3649.8  | 1644.7     | 15.8                  | 255.4                    | 91.3                         |
| 2012.1  | 4012.6                    | 3658.7  | 1673.9     | 13.4                  | 222.7                    | 111.1                        |
| 2012.2  | 4004.9                    | 3629.6  | 1710.7     | 11.3                  | 171.3                    | 91.9                         |
| 2012.3  | 4000.4                    | 3608.5  | 1736.3     | 7.9                   | 118.8                    | 70.7                         |
| 2012.4  | 3990.2                    | 3579.2  | 1775.8     | 11.8                  | 201.3                    | 103.9                        |
| 2013.1  | 3963.0                    | 3601.1  | 1781.2     | 16.5                  | 184.9                    | 141.7                        |
| 2013.2  | 3956.3                    | 3618.6  | 1770.3     | 15.2                  | 136.7                    | 247.6                        |
| 2013.3  | 3952.8                    | 3635.1  | 1757.3     | 9.3                   | 110.7                    | 248.6                        |
| 2013.4  | 3946.5                    | 3659.3  | 1739.5     | 14.7                  | 172.8                    | 334.5                        |

Note: 2008.\*. represents the quarter \* of the year 2008

Rates are per 10,000 inhabitants and age-standardized on the European Standard Population (direct method)

**Table S3: Age-adjusted rates by the direct method per 10,000 inhabitants based on the European Standard Population. NAVARRE N=73,644 (2008-2013).**

| Quarter | Smoking status prevalence |         |            | New smokers incidence | New ex-smokers incidence | Ex-smoker relapses incidence |
|---------|---------------------------|---------|------------|-----------------------|--------------------------|------------------------------|
|         | Non smokers               | Smokers | Ex-smokers |                       |                          |                              |
| 2008.1  | 5652.5                    | 4034.2  | 313.3      | 25.3                  | 175.3                    | 227.0                        |
| 2008.2  | 5642.5                    | 4013.0  | 344.5      | 17.2                  | 181.0                    | 160.4                        |
| 2008.3  | 5632.4                    | 4003.3  | 364.3      | 16.5                  | 109.1                    | 129.4                        |
| 2008.4  | 5620.0                    | 3993.3  | 386.7      | 21.4                  | 127.7                    | 230.3                        |
| 2009.1  | 5645.0                    | 3951.4  | 403.7      | 30.9                  | 136.4                    | 225.4                        |
| 2009.2  | 5630.8                    | 3944.1  | 425.1      | 23.5                  | 132.1                    | 174.0                        |
| 2009.3  | 5623.5                    | 3934.7  | 441.8      | 12.5                  | 100.3                    | 100.7                        |
| 2009.4  | 5614.7                    | 3925.5  | 459.8      | 14.8                  | 109.9                    | 134.7                        |
| 2010.1  | 5618.3                    | 3905.9  | 475.8      | 27.2                  | 111.2                    | 209.4                        |
| 2010.2  | 5605.5                    | 3893.8  | 500.7      | 21.1                  | 114.9                    | 132.5                        |
| 2010.3  | 5595.1                    | 3889.1  | 515.8      | 16.4                  | 82.2                     | 98.7                         |
| 2010.4  | 5581.9                    | 3885.3  | 532.8      | 21.4                  | 89.9                     | 81.2                         |
| 2011.1  | 4990.3                    | 3806.9  | 548.1      | 16.0                  | 136.8                    | 141.3                        |
| 2011.2  | 4979.2                    | 3795.8  | 570.2      | 20.3                  | 116.7                    | 113.8                        |
| 2011.3  | 4972.0                    | 3791.6  | 581.6      | 12.7                  | 48.6                     | 60.2                         |
| 2011.4  | 4964.3                    | 3780.5  | 600.4      | 13.8                  | 99.6                     | 118.6                        |
| 2012.1  | 4910.7                    | 3804.6  | 630.0      | 18.6                  | 127.3                    | 87.6                         |
| 2012.2  | 4902.9                    | 3781.3  | 661.1      | 13.7                  | 130.1                    | 108.4                        |
| 2012.3  | 4897.7                    | 3773.3  | 674.3      | 9.8                   | 75.2                     | 58.6                         |
| 2012.4  | 4888.9                    | 3760.5  | 695.8      | 15.2                  | 110.2                    | 96.0                         |
| 2013.1  | 4886.8                    | 3746.7  | 711.8      | 15.1                  | 121.0                    | 116.4                        |
| 2013.2  | 4876.8                    | 3733.2  | 735.2      | 16.9                  | 104.2                    | 97.4                         |
| 2013.3  | 4870.8                    | 3727.9  | 746.6      | 9.5                   | 60.7                     | 119.1                        |
| 2013.4  | 4861.3                    | 3719.8  | 764.1      | 16.9                  | 90.7                     | 97.8                         |

Note: 2008.\*. represents the quarter \* of the year 2008

Rates are per 10,000 inhabitants and age-standardized on the European Standard Population (direct method)

**Table S4: Age-adjusted rates by the direct method per 10,000 inhabitants based on the European Standard Population. THE BALEARIC ISLANDS N=178,251 (2010-2013).**

| Quarter | Smoking status prevalence |         |            | New smokers incidence | New ex-smokers incidence | Ex-smoker relapses incidence |
|---------|---------------------------|---------|------------|-----------------------|--------------------------|------------------------------|
|         | Non smokers               | Smokers | Ex-smokers |                       |                          |                              |
| 2010.2  | 5411.0                    | 4029.7  | 559.3      | 9.3                   | 158.5                    | 576.6                        |
| 2010.3  | 5406.4                    | 4007.3  | 586.2      | 9.0                   | 151.6                    | 527.0                        |
| 2010.4  | 5401.6                    | 3982.7  | 615.7      | 9.3                   | 158.7                    | 503.7                        |
| 2011.1  | 5374.9                    | 3987.9  | 637.1      | 6.6                   | 149.9                    | 545.7                        |
| 2011.2  | 5372.4                    | 3959.3  | 668.3      | 5.2                   | 170.9                    | 424.4                        |
| 2011.3  | 5369.7                    | 3929.5  | 700.8      | 5.2                   | 160.1                    | 383.9                        |
| 2011.4  | 5367.4                    | 3898.4  | 734.2      | 4.0                   | 169.8                    | 385.6                        |
| 2012.1  | 5345.3                    | 3888.3  | 766.4      | 4.3                   | 188.1                    | 351.8                        |
| 2012.2  | 5344.0                    | 3862.4  | 793.6      | 2.4                   | 137.0                    | 370.6                        |
| 2012.3  | 5342.5                    | 3841.0  | 816.6      | 2.9                   | 113.5                    | 372.6                        |
| 2012.4  | 5341.7                    | 3818.9  | 839.4      | 1.6                   | 133.0                    | 339.2                        |
| 2013.1  | 5324.1                    | 3825.3  | 850.7      | 2.1                   | 130.5                    | 480.5                        |
| 2013.2  | 5317.8                    | 3810.5  | 871.7      | 12.1                  | 106.7                    | 453.0                        |
| 2013.3  | 5308.3                    | 3800.6  | 891.1      | 17.5                  | 93.7                     | 103.9                        |
| 2013.4  | 5298.6                    | 3787.4  | 914.1      | 17.5                  | 116.8                    | 285.1                        |

Note: 2010.\*. represents the quarter \* of the year 2010

Rates are per 10,000 inhabitants and age-standardized on the European Standard Population (direct method)

1  
2  
3  
4  
5  
6  
7  
8  
9  
10  
11  
12  
13  
14  
15  
16  
17  
18  
19  
20  
21  
22  
23  
24  
25  
26  
27  
28  
29  
30  
31  
32  
33  
34  
35  
36  
37  
38  
39  
40  
41  
42  
43  
44  
45  
46

**Table S5. Age-adjusted rates by the direct method for 10,000 inhabitants based on the European Standard Population in CATALONIA. N=72,340 (2008-2013).**

| Quarter | Smoking Status prevalence |        |         |        |            |        | New smokers incidence | New ex-smokers incidence | Ex-smoker relapse incidence |       |       |       |
|---------|---------------------------|--------|---------|--------|------------|--------|-----------------------|--------------------------|-----------------------------|-------|-------|-------|
|         | Non smokers               |        | Smokers |        | Ex-smokers |        |                       |                          |                             |       |       |       |
|         | Female                    | Male   | Female  | Male   | Female     | Male   |                       |                          |                             |       |       |       |
| 2008.1  | 5909.5                    | 3349.2 | 3411.5  | 4910.7 | 679.0      | 1740.1 | 16.6                  | 27.8                     | 246.7                       | 260.5 | 315.2 | 158.2 |
| 2008.2  | 5900.4                    | 3331.6 | 3385.4  | 4856.2 | 714.2      | 1812.2 | 14.3                  | 34.4                     | 266.5                       | 202.9 | 101.2 | 195.0 |
| 2008.3  | 5891.9                    | 3318.8 | 3368.4  | 4822.1 | 739.7      | 1859.1 | 14.0                  | 21.8                     | 275.0                       | 265.9 | 289.0 | 166.5 |
| 2008.4  | 5876.9                    | 3296.1 | 3356.2  | 4789.4 | 766.9      | 1914.5 | 24.0                  | 31.9                     | 254.1                       | 329.2 | 112.0 | 99.6  |
| 2009.1  | 5832.7                    | 3323.5 | 3379.8  | 4769.9 | 787.5      | 1906.6 | 27.8                  | 26.3                     | 289.2                       | 234.0 | 148.8 | 105.2 |
| 2009.2  | 5823.1                    | 3311.7 | 3366.5  | 4749.0 | 810.4      | 1939.3 | 13.7                  | 19.7                     | 182.0                       | 237.8 | 89.5  | 79.2  |
| 2009.3  | 5814.6                    | 3300.6 | 3356.2  | 4728.4 | 829.2      | 1971.1 | 11.9                  | 15.3                     | 154.4                       | 165.7 | 181.4 | 65.8  |
| 2009.4  | 5804.4                    | 3282.4 | 3335.4  | 4702.6 | 860.2      | 2015.0 | 14.3                  | 28.0                     | 243.3                       | 203.9 | 188.5 | 152.0 |
| 2010.1  | 5757.2                    | 3312.5 | 3359.5  | 4679.7 | 883.3      | 2007.8 | 14.0                  | 26.7                     | 201.5                       | 144.1 | 133.5 | 109.4 |
| 2010.2  | 5744.1                    | 3292.3 | 3355.5  | 4668.2 | 900.4      | 2039.6 | 24.1                  | 30.4                     | 146.6                       | 131.6 | 164.1 | 152.0 |
| 2010.3  | 5730.0                    | 3279.4 | 3345.8  | 4650.5 | 924.2      | 2070.2 | 20.7                  | 22.7                     | 156.1                       | 134.4 | 106.6 | 98.0  |
| 2010.4  | 5710.9                    | 3256.8 | 3332.3  | 4616.4 | 956.8      | 2126.8 | 30.9                  | 24.3                     | 205.4                       | 177.3 | 132.2 | 114.9 |
| 2011.1  | 5231.2                    | 2821.0 | 3138.8  | 4408.8 | 975.2      | 2115.4 | 15.0                  | 16.8                     | 181.1                       | 166.1 | 62.6  | 146.7 |
| 2011.2  | 5223.4                    | 2811.7 | 3115.8  | 4356.5 | 1006.0     | 2177.1 | 12.2                  | 14.3                     | 231.6                       | 203.8 | 118.9 | 65.4  |
| 2011.3  | 5216.7                    | 2804.3 | 3095.4  | 4326.8 | 1033.2     | 2214.1 | 12.4                  | 15.2                     | 166.4                       | 136.0 | 93.0  | 68.5  |
| 2011.4  | 5209.6                    | 2789.1 | 3057.6  | 4270.9 | 1078.0     | 2285.2 | 12.1                  | 21.2                     | 308.9                       | 241.6 | 111.0 | 78.8  |
| 2012.1  | 5142.2                    | 2792.0 | 3082.8  | 4259.8 | 1120.2     | 2293.5 | 9.3                   | 19.1                     | 251.1                       | 216.5 | 140.4 | 83.6  |
| 2012.2  | 5136.1                    | 2782.4 | 3059.1  | 4225.1 | 1150.0     | 2337.7 | 10.4                  | 12.4                     | 215.6                       | 162.3 | 107.4 | 75.8  |
| 2012.3  | 5132.0                    | 2777.7 | 3041.8  | 4200.0 | 1171.4     | 2367.6 | 8.7                   | 7.3                      | 135.6                       | 113.1 | 61.0  | 80.2  |
| 2012.4  | 5123.4                    | 2765.4 | 3020.5  | 4161.9 | 1201.3     | 2417.9 | 10.2                  | 16.2                     | 192.8                       | 203.5 | 128.5 | 89.1  |
| 2013.1  | 5063.9                    | 2781.5 | 3055.9  | 4167.2 | 1225.4     | 2396.5 | 15.4                  | 19.9                     | 213.2                       | 180.4 | 167.8 | 123.5 |
| 2013.2  | 5058.8                    | 2773.4 | 3057.2  | 4202.9 | 1229.3     | 2368.9 | 10.2                  | 21.9                     | 146.9                       | 131.3 | 216.4 | 251.9 |
| 2013.3  | 5055.0                    | 2770.2 | 3060.2  | 4234.1 | 1230.0     | 2340.9 | 9.0                   | 10.7                     | 127.0                       | 106.7 | 217.7 | 263.3 |
| 2013.4  | 5049.2                    | 2763.3 | 3063.6  | 4281.9 | 1232.5     | 2300.1 | 11.8                  | 21.1                     | 202.8                       | 159.2 | 325.6 | 315.6 |

Note: 2008.\*. represents the quarter \* of the year 2008

Rates are per 10,000 inhabitants and age-standardized on the European Standard Population (direct method)



**Table S6. Age-adjusted rates by the direct method per 10,000 inhabitants based on the European Standard Population in NAVARRE. N=37,898 (2008-2013).**

| Quarter | Smoking Status prevalence |        |         |        |            |       | New smokers incidence | New ex-smokers incidence | Ex-smoker relapse incidence |        |       |       |
|---------|---------------------------|--------|---------|--------|------------|-------|-----------------------|--------------------------|-----------------------------|--------|-------|-------|
|         | Non smokers               |        | Smokers |        | Ex-smokers |       |                       |                          |                             | Female | Male  |       |
|         | Female                    | Male   | Female  | Male   | Female     | Male  |                       |                          |                             | Female | Male  |       |
| 2008.1  | 6224.8                    | 5021.1 | 3542.5  | 4569.6 | 232.7      | 409.3 | 22.3                  | 31.0                     | 152.7                       | 172.3  | 164.4 | 295.8 |
| 2008.2  | 6215.3                    | 5010.6 | 3527.8  | 4539.7 | 256.9      | 449.7 | 15.2                  | 20.3                     | 168.7                       | 187.7  | 136.9 | 173.7 |
| 2008.3  | 6207.4                    | 4998.8 | 3518.5  | 4528.6 | 274.2      | 472.6 | 11.5                  | 22.1                     | 147.1                       | 97.1   | 147.9 | 123.7 |
| 2008.4  | 6198.6                    | 4982.4 | 3510.9  | 4515.4 | 290.4      | 502.2 | 14.8                  | 30.0                     | 157.9                       | 125.6  | 296.5 | 98.8  |
| 2009.1  | 6209.7                    | 5028.3 | 3485.7  | 4451.5 | 304.6      | 520.2 | 24.9                  | 39.7                     | 184.8                       | 111.3  | 254.0 | 197.0 |
| 2009.2  | 6197.8                    | 5011.6 | 3480.3  | 4441.1 | 321.9      | 547.3 | 17.4                  | 32.6                     | 177.2                       | 127.7  | 152.7 | 171.7 |
| 2009.3  | 6191.6                    | 5003.2 | 3475.5  | 4426.3 | 332.9      | 570.4 | 10.7                  | 15.2                     | 108.4                       | 98.3   | 73.4  | 111.5 |
| 2009.4  | 6186.2                    | 4990.0 | 3470.2  | 4413.1 | 343.6      | 596.9 | 8.4                   | 24.0                     | 97.2                        | 115.8  | 126.6 | 134.7 |
| 2010.1  | 6175.4                    | 5014.1 | 3464.6  | 4375.5 | 360.0      | 610.4 | 22.6                  | 33.5                     | 115.7                       | 112.9  | 224.3 | 208.6 |
| 2010.2  | 6164.6                    | 4999.4 | 3455.7  | 4359.8 | 379.7      | 640.8 | 16.4                  | 27.9                     | 119.1                       | 114.5  | 106.4 | 129.5 |
| 2010.3  | 6154.5                    | 4988.6 | 3456.0  | 4350.4 | 389.5      | 661.0 | 16.2                  | 17.0                     | 111.3                       | 75.9   | 88.3  | 94.5  |
| 2010.4  | 6142.1                    | 4974.6 | 3455.4  | 4343.4 | 402.5      | 682.1 | 17.8                  | 26.3                     | 126.9                       | 80.9   | 71.3  | 85.7  |
| 2011.1  | 5541.4                    | 4399.8 | 3388.4  | 4248.3 | 415.4      | 697.1 | 12.2                  | 21.0                     | 146.2                       | 135.4  | 91.3  | 183.2 |
| 2011.2  | 5532.4                    | 4386.6 | 3381.0  | 4233.7 | 431.9      | 724.9 | 15.5                  | 26.8                     | 151.1                       | 110.6  | 117.2 | 103.9 |
| 2011.3  | 5524.7                    | 4379.8 | 3377.8  | 4228.5 | 442.7      | 737.0 | 12.6                  | 13.7                     | 55.8                        | 44.9   | 61.6  | 54.1  |
| 2011.4  | 5518.9                    | 4370.0 | 3369.7  | 4213.6 | 456.6      | 761.7 | 9.6                   | 19.5                     | 118.2                       | 95.4   | 70.0  | 160.8 |
| 2012.1  | 5452.1                    | 4335.6 | 3408.9  | 4217.7 | 484.2      | 792.0 | 15.9                  | 22.5                     | 129.3                       | 126.5  | 106.9 | 65.3  |
| 2012.2  | 5445.6                    | 4326.1 | 3389.4  | 4190.1 | 510.2      | 829.0 | 11.7                  | 17.2                     | 125.1                       | 131.6  | 95.3  | 114.5 |
| 2012.3  | 5442.6                    | 4318.6 | 3385.2  | 4178.7 | 517.4      | 847.9 | 6.2                   | 14.2                     | 67.6                        | 78.0   | 68.6  | 41.2  |
| 2012.4  | 5434.5                    | 4308.9 | 3379.5  | 4159.1 | 531.2      | 877.2 | 12.5                  | 19.6                     | 130.7                       | 110.0  | 66.7  | 126.7 |
| 2013.1  | 5420.0                    | 4323.0 | 3380.9  | 4128.0 | 544.3      | 894.1 | 14.1                  | 16.4                     | 133.8                       | 124.7  | 68.6  | 157.5 |
| 2013.2  | 5413.7                    | 4309.1 | 3367.7  | 4114.5 | 563.9      | 921.6 | 10.1                  | 25.2                     | 103.2                       | 104.7  | 87.0  | 98.4  |
| 2013.3  | 5408.6                    | 4302.1 | 3363.6  | 4108.1 | 573.1      | 935.1 | 7.2                   | 12.7                     | 72.3                        | 57.3   | 152.7 | 85.9  |
| 2013.4  | 5399.9                    | 4291.6 | 3360.4  | 4094.8 | 584.9      | 958.8 | 13.9                  | 21.7                     | 65.6                        | 102.8  | 72.2  | 116.0 |

Note: 2008.\*. represents the quarter \* of the year 2008

Rates are per 10,000 inhabitants and age-standardized on the European Standard Population (direct method)

1  
2  
3  
4  
5  
6  
7  
8  
9  
10  
11  
12  
13  
14  
15  
16  
17  
18  
19  
20  
21  
22  
23  
24  
25  
26  
27  
28  
29  
30  
31  
32  
33  
34  
35  
36  
37  
38  
39  
40  
41  
42  
43  
44  
45  
46

**Table S7. Age-adjusted rates by the direct method per 10,000 inhabitants based on the European Standard Population in THE BALEARIC ISLANDS. N= 94,164 (2010-2013).**

| Quarter | Smoking Status prevalence |        |         |        |            |        | New smokers incidence | New ex-smokers incidence | Ex-smoker relapse incidence |       |       |       |
|---------|---------------------------|--------|---------|--------|------------|--------|-----------------------|--------------------------|-----------------------------|-------|-------|-------|
|         | Non smokers               |        | Smokers |        | Ex-smokers |        |                       |                          |                             |       |       |       |
|         | Female                    | Male   | Female  | Male   | Female     | Male   |                       |                          |                             |       |       |       |
| 2010.2  | 6224.8                    | 4484.3 | 3412.3  | 4723.7 | 362.9      | 792.0  | 8.9                   | 9.9                      | 106.8                       | 169.6 | 631.1 | 560.7 |
| 2010.3  | 6220.5                    | 4479.3 | 3395.5  | 4695.0 | 384.0      | 825.7  | 8.2                   | 10.4                     | 149.6                       | 147.6 | 576.9 | 435.9 |
| 2010.4  | 6215.8                    | 4474.3 | 3376.3  | 4664.4 | 408.0      | 861.2  | 8.8                   | 10.1                     | 179.2                       | 150.7 | 484.7 | 571.5 |
| 2011.1  | 6171.2                    | 4472.1 | 3395.3  | 4651.7 | 433.5      | 876.2  | 6.7                   | 6.6                      | 141.1                       | 146.7 | 562.7 | 508.9 |
| 2011.2  | 6168.5                    | 4469.8 | 3375.7  | 4612.8 | 455.9      | 917.5  | 5.2                   | 5.4                      | 140.3                       | 173.8 | 446.1 | 426.0 |
| 2011.3  | 6165.8                    | 4467.0 | 3353.4  | 4574.6 | 480.8      | 958.4  | 4.9                   | 6.0                      | 162.5                       | 154.9 | 400.9 | 391.6 |
| 2011.4  | 6163.1                    | 4465.3 | 3330.1  | 4534.6 | 506.8      | 1000.1 | 4.6                   | 3.4                      | 149.3                       | 170.9 | 296.7 | 540.3 |
| 2012.1  | 6118.6                    | 4474.0 | 3337.9  | 4501.2 | 543.6      | 1024.8 | 3.7                   | 5.1                      | 179.2                       | 182.1 | 306.5 | 461.7 |
| 2012.2  | 6117.0                    | 4473.2 | 3318.1  | 4468.3 | 564.9      | 1058.5 | 2.8                   | 1.9                      | 109.0                       | 139.6 | 359.8 | 348.6 |
| 2012.3  | 6115.2                    | 4471.9 | 3302.0  | 4440.5 | 582.8      | 1087.7 | 3.1                   | 2.5                      | 103.4                       | 112.8 | 376.5 | 363.9 |
| 2012.4  | 6114.3                    | 4471.2 | 3285.7  | 4411.7 | 600.0      | 1117.0 | 1.7                   | 1.6                      | 122.7                       | 132.9 | 414.0 | 213.4 |
| 2013.1  | 6077.2                    | 4479.2 | 3302.2  | 4406.4 | 620.6      | 1114.4 | 0.9                   | 4.1                      | 137.9                       | 122.6 | 492.0 | 470.3 |
| 2013.2  | 6070.8                    | 4473.1 | 3291.1  | 4387.8 | 638.2      | 1139.1 | 11.9                  | 12.7                     | 91.0                        | 105.4 | 410.8 | 532.6 |
| 2013.3  | 6056.9                    | 4468.7 | 3287.9  | 4370.1 | 655.1      | 1161.2 | 23.4                  | 10.4                     | 94.4                        | 90.1  | 110.4 | 87.5  |
| 2013.4  | 6046.1                    | 4460.3 | 3280.8  | 4349.5 | 673.1      | 1190.2 | 18.2                  | 16.9                     | 100.0                       | 121.4 | 342.4 | 116.1 |

Note: 2010.\*. represents the quarter \* of the year 2010

Rates are per 10,000 inhabitants and age-standardized on the European Standard Population (direct method)

**SUPPLEMENTARY DATA FOR Effect of the comprehensive smoke-free law on time trends in smoking behaviour in Primary Health Care patients in Spain: a longitudinal observational study**

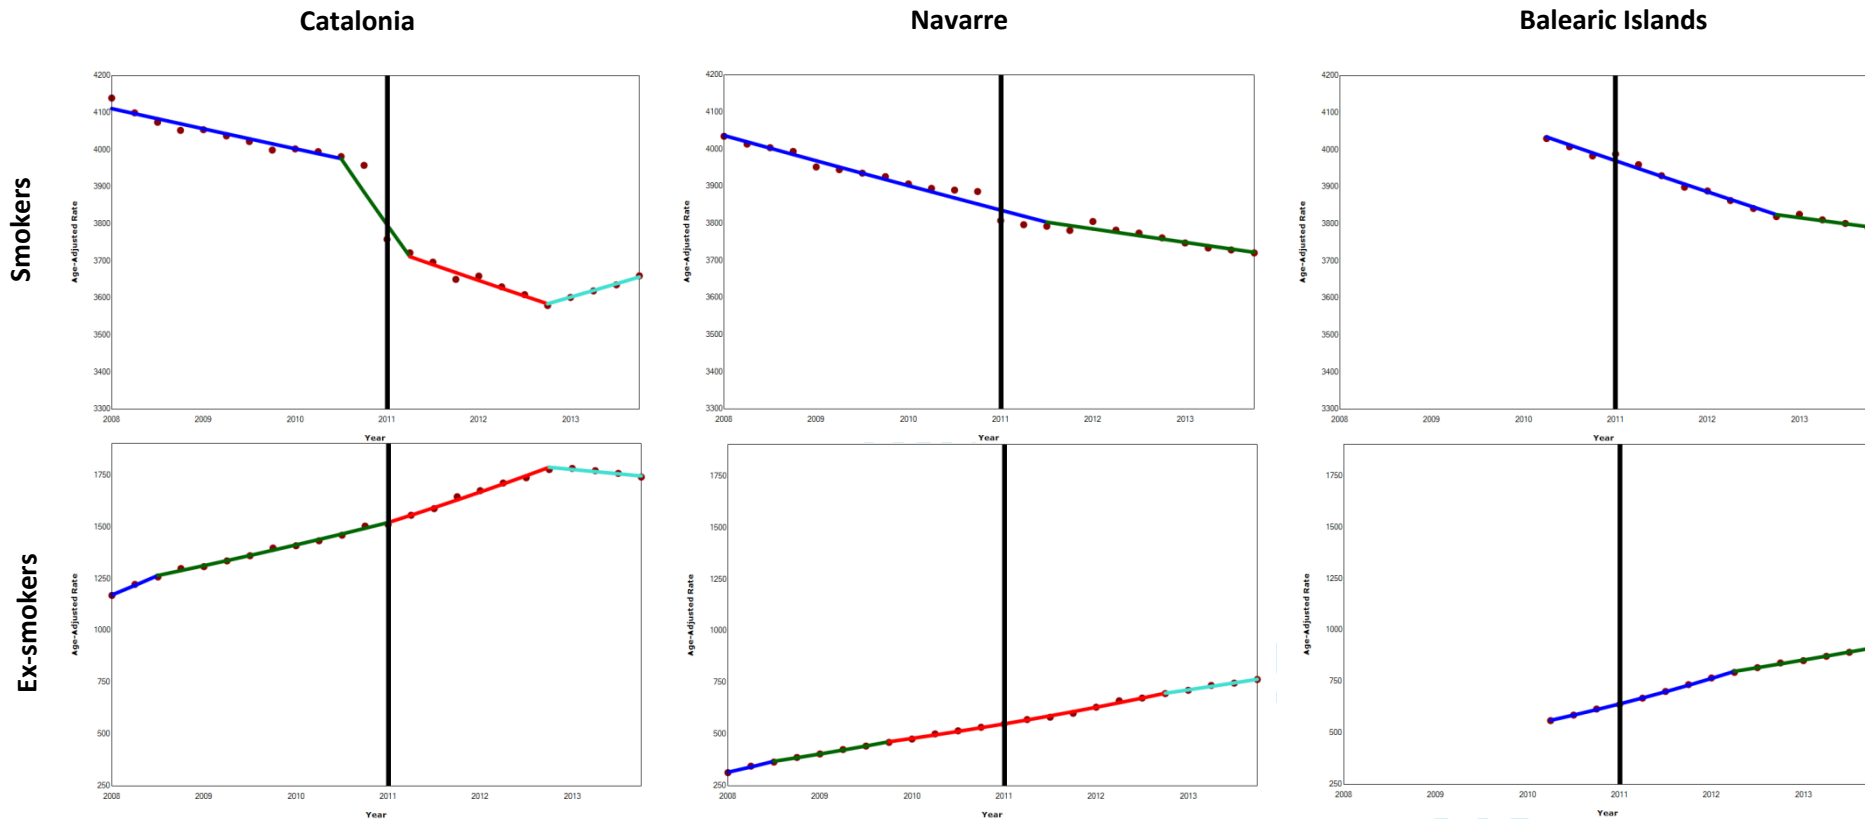

**Figure S1: Overall trends of age-standardized prevalence rates of smoking status in Catalonia, Navarre and the Balearic Islands.**

Solid lines represent the Joinpoint regression lines (each colour is a different trend); circle red points represent the age-adjusted prevalence rates. Black vertical lines represent the year when the Spanish comprehensive smoke-free law was introduced (2011).

1  
2  
3  
4  
5  
6  
7  
8  
9  
10  
11  
12  
13  
14  
15  
16  
17  
18  
19  
20  
21  
22  
23  
24  
25  
26  
27  
28  
29  
30  
31  
32  
33  
34  
35  
36  
37  
38  
39  
40  
41  
42  
43  
44  
45  
46



**Figure S2: Overall trends of age-standardized incidence rates of new smokers, ex-smokers and ex-smoker relapse in Catalonia, Navarre and the Balearic Islands.** Solid lines represent the Joinpoint regression lines (each colour is a different trend); circle red points represent the age-adjusted incidence rates. Black vertical lines represent the year when the Spanish comprehensive smoke-free law was introduced (2011).

**STROBE 2007 (v4) Statement—Checklist of items that should be included in reports of *cross-sectional studies***

| Section/Topic                | Item # | Recommendation                                                                                                                                                                       | Reported on page # |
|------------------------------|--------|--------------------------------------------------------------------------------------------------------------------------------------------------------------------------------------|--------------------|
| <b>Title and abstract</b>    | 1      | (a) Indicate the study's design with a commonly used term in the title or the abstract                                                                                               | 3                  |
|                              |        | (b) Provide in the abstract an informative and balanced summary of what was done and what was found                                                                                  | 3                  |
| <b>Introduction</b>          |        |                                                                                                                                                                                      |                    |
| Background/rationale         | 2      | Explain the scientific background and rationale for the investigation being reported                                                                                                 | 5-6                |
| Objectives                   | 3      | State specific objectives, including any prespecified hypotheses                                                                                                                     | 6                  |
| <b>Methods</b>               |        |                                                                                                                                                                                      |                    |
| Study design                 | 4      | Present key elements of study design early in the paper                                                                                                                              | 6                  |
| Setting                      | 5      | Describe the setting, locations, and relevant dates, including periods of recruitment, exposure, follow-up, and data collection                                                      | 6-7                |
| Participants                 | 6      | (a) Give the eligibility criteria, and the sources and methods of selection of participants                                                                                          | 6-7                |
| Variables                    | 7      | Clearly define all outcomes, exposures, predictors, potential confounders, and effect modifiers. Give diagnostic criteria, if applicable                                             | 7                  |
| Data sources/<br>measurement | 8*     | For each variable of interest, give sources of data and details of methods of assessment (measurement). Describe comparability of assessment methods if there is more than one group | 7                  |
| Bias                         | 9      | Describe any efforts to address potential sources of bias                                                                                                                            | 7                  |
| Study size                   | 10     | Explain how the study size was arrived at                                                                                                                                            | 6 + Figure 1       |
| Quantitative variables       | 11     | Explain how quantitative variables were handled in the analyses. If applicable, describe which groupings were chosen and why                                                         | 7-8                |
| Statistical methods          | 12     | (a) Describe all statistical methods, including those used to control for confounding                                                                                                | 7-8                |
|                              |        | (b) Describe any methods used to examine subgroups and interactions                                                                                                                  | 7-8                |
|                              |        | (c) Explain how missing data were addressed                                                                                                                                          | 6 + 15             |
|                              |        | (d) If applicable, describe analytical methods taking account of sampling strategy                                                                                                   |                    |
|                              |        | (e) Describe any sensitivity analyses                                                                                                                                                |                    |
| <b>Results</b>               |        |                                                                                                                                                                                      |                    |

|                          |     |                                                                                                                                                                                                              |                  |
|--------------------------|-----|--------------------------------------------------------------------------------------------------------------------------------------------------------------------------------------------------------------|------------------|
| Participants             | 13* | (a) Report numbers of individuals at each stage of study—eg numbers potentially eligible, examined for eligibility, confirmed eligible, included in the study, completing follow-up, and analysed            | 6, 8. Figure 1   |
|                          |     | (b) Give reasons for non-participation at each stage                                                                                                                                                         | 6. Figure 1      |
|                          |     | (c) Consider use of a flow diagram                                                                                                                                                                           | 6. Figure 1      |
| Descriptive data         | 14* | (a) Give characteristics of study participants (eg demographic, clinical, social) and information on exposures and potential confounders                                                                     | 8. Table 1.      |
|                          |     | (b) Indicate number of participants with missing data for each variable of interest                                                                                                                          | 8                |
| Outcome data             | 15* | Report numbers of outcome events or summary measures                                                                                                                                                         | 8-12. Tables 2-4 |
| Main results             | 16  | (a) Give unadjusted estimates and, if applicable, confounder-adjusted estimates and their precision (eg, 95% confidence interval). Make clear which confounders were adjusted for and why they were included | 8-12. Tables 2-4 |
|                          |     | (b) Report category boundaries when continuous variables were categorized                                                                                                                                    |                  |
|                          |     | (c) If relevant, consider translating estimates of relative risk into absolute risk for a meaningful time period                                                                                             |                  |
| Other analyses           | 17  | Report other analyses done—eg analyses of subgroups and interactions, and sensitivity analyses                                                                                                               |                  |
| <b>Discussion</b>        |     |                                                                                                                                                                                                              |                  |
| Key results              | 18  | Summarise key results with reference to study objectives                                                                                                                                                     | 13               |
| Limitations              | 19  | Discuss limitations of the study, taking into account sources of potential bias or imprecision. Discuss both direction and magnitude of any potential bias                                                   | 14-15            |
| Interpretation           | 20  | Give a cautious overall interpretation of results considering objectives, limitations, multiplicity of analyses, results from similar studies, and other relevant evidence                                   | 13-15            |
| Generalisability         | 21  | Discuss the generalisability (external validity) of the study results                                                                                                                                        | 15               |
| <b>Other information</b> |     |                                                                                                                                                                                                              |                  |
| Funding                  | 22  | Give the source of funding and the role of the funders for the present study and, if applicable, for the original study on which the present article is based                                                | 15-16            |

\*Give information separately for cases and controls in case-control studies and, if applicable, for exposed and unexposed groups in cohort and cross-sectional studies.

**Note:** An Explanation and Elaboration article discusses each checklist item and gives methodological background and published examples of transparent reporting. The STROBE checklist is best used in conjunction with this article (freely available on the Web sites of PLoS Medicine at <http://www.plosmedicine.org/>, Annals of Internal Medicine at <http://www.annals.org/>, and Epidemiology at <http://www.epidem.com/>). Information on the STROBE Initiative is available at [www.strobe-statement.org](http://www.strobe-statement.org).

# BMJ Open

## Effect of the comprehensive smoke-free law on time trends in smoking behaviour in Primary Health Care patients in Spain: a longitudinal observational study

|                                 |                                                                                                                                                                                                                                                                                                                                                                                                                                                                                                                                                                                                                                                                                                                                                                                                                                                                                                                                                                                                                                                                                                                                                                                                                                                                                                                    |
|---------------------------------|--------------------------------------------------------------------------------------------------------------------------------------------------------------------------------------------------------------------------------------------------------------------------------------------------------------------------------------------------------------------------------------------------------------------------------------------------------------------------------------------------------------------------------------------------------------------------------------------------------------------------------------------------------------------------------------------------------------------------------------------------------------------------------------------------------------------------------------------------------------------------------------------------------------------------------------------------------------------------------------------------------------------------------------------------------------------------------------------------------------------------------------------------------------------------------------------------------------------------------------------------------------------------------------------------------------------|
| Journal:                        | <i>BMJ Open</i>                                                                                                                                                                                                                                                                                                                                                                                                                                                                                                                                                                                                                                                                                                                                                                                                                                                                                                                                                                                                                                                                                                                                                                                                                                                                                                    |
| Manuscript ID                   | bmjopen-2017-020120.R3                                                                                                                                                                                                                                                                                                                                                                                                                                                                                                                                                                                                                                                                                                                                                                                                                                                                                                                                                                                                                                                                                                                                                                                                                                                                                             |
| Article Type:                   | Research                                                                                                                                                                                                                                                                                                                                                                                                                                                                                                                                                                                                                                                                                                                                                                                                                                                                                                                                                                                                                                                                                                                                                                                                                                                                                                           |
| Date Submitted by the Author:   | 18-Oct-2018                                                                                                                                                                                                                                                                                                                                                                                                                                                                                                                                                                                                                                                                                                                                                                                                                                                                                                                                                                                                                                                                                                                                                                                                                                                                                                        |
| Complete List of Authors:       | <p>Pons-Vigués, Mariona; Institut Universitari d'Investigació en Atenció Primària Jordi Gol (IDIAP Jordi Gol), Rando-Matos , Yolanda; Centre d'Atenció Primària (CAP) Florida Nord. Institut Català de la Salut (ICS); Institut Universitari d'Investigació en Atenció Primària Jordi Gol (IDIAP Jordi Gol)</p> <p>Rodriguez-Blanco, Teresa; IDIAP Jordi Gol Foundation IDIAP Jordi Gol Foundation, Department of Epidemiology and Biostatistics</p> <p>Ballvé-Moreno , Josep Lluís ; Centre d'Atenció Primària (CAP) Florida Nord. Institut Català de la Salut (ICS) ; Institut Universitari d'Investigació en Atenció Primària Jordi Gol (IDIAP Jordi Gol)</p> <p>Ripoll, Joana; Balears Health services-IbSalut, 1. Primary Care Research Unit of Mallorca</p> <p>Llobera, Joan; Balears Health services-IbSalut, 1. Primary Care Research Unit of Mallorca</p> <p>Morán, Julio; Equipo de Atención Primaria de Tafalla. Servicio Navarro de Salud</p> <p>López-Jiménez, Tomàs; Institut Universitari d'Investigació en Atenció Primària Jordi Gol (IDIAP Jordi Gol)</p> <p>Violan-Fors, Concepción; Institut Universitari d'Investigació en Atenció Primària Jordi Gol (IDIAP Jordi Gol)</p> <p>Bolibar, Bonaventura; Institut Universitari d'Investigació en Atenció Primària Jordi Gol (IDIAP Jordi Gol)</p> |
| <b>Primary Subject Heading</b>: | Smoking and tobacco                                                                                                                                                                                                                                                                                                                                                                                                                                                                                                                                                                                                                                                                                                                                                                                                                                                                                                                                                                                                                                                                                                                                                                                                                                                                                                |
| Secondary Subject Heading:      | Epidemiology, General practice / Family practice, Health policy                                                                                                                                                                                                                                                                                                                                                                                                                                                                                                                                                                                                                                                                                                                                                                                                                                                                                                                                                                                                                                                                                                                                                                                                                                                    |
| Keywords:                       | Electronic health records, Joinpoint analysis, Primary Health Care, Smoke-Free Policy, Smoking                                                                                                                                                                                                                                                                                                                                                                                                                                                                                                                                                                                                                                                                                                                                                                                                                                                                                                                                                                                                                                                                                                                                                                                                                     |
|                                 |                                                                                                                                                                                                                                                                                                                                                                                                                                                                                                                                                                                                                                                                                                                                                                                                                                                                                                                                                                                                                                                                                                                                                                                                                                                                                                                    |

SCHOLARONE™  
Manuscripts

1  
2  
3 **Effect of the comprehensive smoke-free law on time trends in smoking behaviour in Primary Health Care patients in**  
4 **Spain: a longitudinal observational study**  
5

6  
7  
8 **Author names and affiliations**

9 Mariona Pons-Vigués <sup>a,b,c</sup>

10 <sup>a</sup> Institut Universitari d'Investigació en Atenció Primària Jordi Gol (IDIAP Jordi Gol), Barcelona, Spain

11 <sup>b</sup> Universitat Autònoma de Barcelona, Bellaterra (Cerdanyola del Vallès), Spain.

12 <sup>c</sup> Universitat de Girona, Girona, Spain

13 e-mail: [mponsv@idiapjgol.info](mailto:mponsv@idiapjgol.info)

14  
15 Yolanda Rando-Matos <sup>d,a</sup>

16 <sup>d</sup> Centre d'Atenció Primària (CAP) Florida Nord. Institut Català de la Salut (ICS), Hospitalet de Llobregat, Barcelona, Spain

17 <sup>a</sup> Institut Universitari d'Investigació en Atenció Primària Jordi Gol (IDIAP Jordi Gol), Barcelona, Spain

18 e-mail: [yrandom@ambitcp.catsalut.net](mailto:yrandom@ambitcp.catsalut.net)

19  
20 Teresa Rodriguez-Blanco <sup>a,b</sup>

21 <sup>a</sup> Institut Universitari d'Investigació en Atenció Primària Jordi Gol (IDIAP Jordi Gol), Barcelona, Spain

22 <sup>b</sup> Universitat Autònoma de Barcelona, Bellaterra (Cerdanyola del Vallès), Spain

23 e-mail: [trodriguez@idiapjgol.org](mailto:trodriguez@idiapjgol.org)

24  
25 Josep Lluís Ballvé-Moreno <sup>d,a</sup>

26 <sup>d</sup> Centre d'Atenció Primària (CAP) Florida Nord. Institut Català de la Salut (ICS), Hospitalet de Llobregat, Barcelona, Spain

27 <sup>a</sup> Institut Universitari d'Investigació en Atenció Primària Jordi Gol (IDIAP Jordi Gol), Barcelona, Spain

28 e-mail: [jllallve@ambitcp.catsalut.net](mailto:jllallve@ambitcp.catsalut.net)

29  
30 Joana Ripoll <sup>e,f</sup>

31 <sup>e</sup> Primary Care Research Unit of Mallorca, Balears Health Services-Ibsalut, Palma, Spain

32 <sup>f</sup> Balearic Islands Health Research Institute (IdISBa), Palma, Spain

33 e-mail: [jripoll@ibsalut.caib.es](mailto:jripoll@ibsalut.caib.es)

34  
35 Joan Llobera <sup>e,f</sup>

36 <sup>e</sup> Primary Care Research Unit of Mallorca, Balears Health Services-Ibsalut, Palma, Spain

37 <sup>f</sup> Balearic Islands Health Research Institute (IdISBa), Palma, Spain

38 e-mail: [jllobera@ibsalut.caib.es](mailto:jllobera@ibsalut.caib.es)

39  
40 Julio Morán <sup>g</sup>

41 <sup>g</sup> Equipo de Atención Primaria de Tafalla. Servicio Navarro de Salud. Barásoain, Navarra, Spain.

42 e-mail: [jmoranpi@navarra.es](mailto:jmoranpi@navarra.es)

43  
44 Tomàs López-Jiménez

45 <sup>a</sup> Institut Universitari d'Investigació en Atenció Primària Jordi Gol (IDIAP Jordi Gol), Barcelona, Spain

46 <sup>b</sup> Universitat Autònoma de Barcelona, Bellaterra (Cerdanyola del Vallès), Spain

47 e-mail: [tlopez@idiapjgol.org](mailto:tlopez@idiapjgol.org)

48  
49 Concepción Violán-Fors <sup>a,b</sup>

50 <sup>a</sup> Institut Universitari d'Investigació en Atenció Primària Jordi Gol (IDIAP Jordi Gol), Barcelona, Spain

51 <sup>b</sup> Universitat Autònoma de Barcelona, Bellaterra (Cerdanyola del Vallès), Spain

52 e-mail: [cviolan@idiapjgol.org](mailto:cviolan@idiapjgol.org)

53  
54 Bonaventura Bolibar <sup>a,b</sup>

55 <sup>a</sup> Institut Universitari d'Investigació en Atenció Primària Jordi Gol (IDIAP Jordi Gol), Barcelona, Spain



1  
2  
3 <sup>b</sup> Universitat Autònoma de Barcelona, Bellaterra (Cerdanyola del Vallès), Spain  
4 e-mail: [bbolibar@idiapjgol.org](mailto:bbolibar@idiapjgol.org)  
5  
6

7 **Corresponding author:** Mariona Pons-Vigués

8 e-mail: [mponsv@idiapjgol.info](mailto:mponsv@idiapjgol.info)

9 Institut Universitari d'Investigació en Atenció Primària Jordi Gol (IDIAP Jordi Gol), Barcelona, Spain

10 Av. Gran Via de les Corts Catalanes 587, àtic

11 08007 - Barcelona

12 Tel: 0034 93 482 42 53

13 [www.idiapjgol.org](http://www.idiapjgol.org)

14 <http://orcid.org/0000-0002-7929-3701>  
15  
16

17 **Word count:** 4358 words  
18  
19  
20  
21  
22  
23  
24  
25  
26  
27  
28  
29  
30  
31  
32  
33  
34  
35  
36  
37  
38  
39  
40  
41  
42  
43  
44  
45  
46  
47  
48  
49  
50  
51  
52  
53  
54  
55  
56  
57  
58  
59  
60

1  
2  
3 **Effect of the comprehensive smoke-free law on time trends in smoking behaviour in Primary Health Care patients in**  
4 **Spain: a longitudinal observational study**  
5  
6  
7

8 **ABSTRACT**

9 **Objective:** This study aimed to analyse the impact of comprehensive smoke-free legislation on the prevalence and  
10 incidence of adult smoking in Primary Health Care patients from three Spanish regions, overall and stratified by sex.

11 **Design:** Longitudinal observational study conducted between 2008 and 2013.

12 **Setting:** 66 Primary Health Care teams in Catalonia, Navarre and the Balearic Islands (Spain).

13 **Participants:** Population over 15 years of age assigned to Primary Health Care teams.

14 **Primary and secondary outcomes measures:** Quarterly age-standardized prevalence of non-smoker, smoker and ex-smoker  
15 and incidence of new smoker, new ex-smoker and ex-smoker relapse rates were estimated with data retrieved from PHC  
16 electronic health records. Joinpoint analysis was used to analyse the trends of age-standardized prevalence and incidence  
17 rates. Trends were expressed as annual percentage change and average annual percent change.

18 **Results:** The overall standardized smoker prevalence rate showed a significant downward trend (higher in men than  
19 women) and the overall standardized ex-smoker prevalence rate showed a significant increased trend (higher in women  
20 than men) in the three regions. Standardized smoker and ex-smoker prevalence rates were higher for men than women in  
21 all regions. With regard to overall trends of incidence rates, new smokers decreased significantly in Catalonia and Navarre  
22 and similarly in men and women, new ex-smokers decreased significantly and more in men in Catalonia and the Balearic  
23 Islands, and ex-smoker relapse increased in Catalonia, particularly in women, and decreased in Navarre.

24 **Conclusions:** Trends on smoking behaviour in Primary Health Care patients remain unchanged after the implementation of  
25 comprehensive smoke-free legislation. The impact of the comprehensive SFL might have been lessened by the effect of the  
26 preceding partial SFL.  
27  
28  
29  
30  
31

32 **Keywords:** Electronic health records; Joinpoint analysis; Primary Health Care; Smoke-Free Policy; Smoking.  
33  
34  
35  
36  
37  
38  
39  
40  
41  
42  
43  
44  
45  
46  
47  
48  
49  
50  
51  
52  
53  
54  
55  
56  
57  
58  
59  
60

### Strengths and limitations of this study

- To our knowledge, no studies have been published on the impact of the Spanish comprehensive smoke-free legislation in all adult Primary Health Care patients
- Used as a research tool, electronic health records portray real-life conditions and provide comprehensive, long-term health histories from a large population sample
- The results of quarterly data by joinpoint analysis provides more precise information than an analysis before-after the implementation of the Law
- This study only considered age and sex since other variables were not available for the adjusted analysis.
- The study period started later (shorter follow-up) in the Balearic Islands to ensure reliability of data

## Effect of the Spanish comprehensive smoke-free law on time trends in smoking behaviour in Primary Health Care patients in Spain: a longitudinal observational study

### INTRODUCTION

Smoking is the leading worldwide cause of preventable death.<sup>1</sup> According to the World Health Organization (WHO), it is estimated that at least 30 million people may die prematurely from tobacco-related diseases.<sup>2</sup> Legislative measures have been adopted to protect people's health in public areas and workplaces. These include increasing the price of cigarettes, banning advertising, sponsorship and smoking in workplaces and public spaces, displaying warnings on tobacco packets and implementing prevention programs.<sup>3</sup>

Some studies show a decrease in smoking prevalence since the introduction of smoke-free legislation (SFL).<sup>4-9</sup> A metaanalysis of 26 studies on the effect of the smoke-free workplace in various countries concluded in 2002 that smoke-free workplaces protect not only non-smokers from the dangers of passive smoking, but they also encourage smokers to reduce tobacco consumption. The authors concluded that SFL is associated with a 3% to 4% reduction in tobacco consumption.<sup>10</sup> In contrast, a Cochrane review published in 2016 which included 24 studies on smoking behaviour showed inconsistencies regarding the impact of smoking bans on smoking prevalence and tobacco consumption.<sup>11</sup>

On January 1, 2006, the Spanish government introduced a partial SFL (Law 28/2005),<sup>12</sup> which included regulations on the sale, supply, consumption and advertising of tobacco products. Smoking was banned in all indoor public and private workplaces with the exception of the hospitality sector, where partial restrictions were established depending on the size of the establishment, i.e., in bars or restaurants smaller than 100 m<sup>2</sup> the managers could decide whether to allow smoking in the premises (Law 28/2005). The mean concentration of nicotine subsequently decreased by 60% in public administration offices and by 97.4% in private workplaces, but in areas where smoking was permitted, including bars and nightclubs, no changes were found.<sup>13-15</sup> This prompted the enactment of a comprehensive SFL (Law 42/2010),<sup>16</sup> which came into force in January 2011. This comprehensive law expanded smoking restriction to all hospitality venues of any size and, as a result, smoking was forbidden in all enclosed public places, including bars, restaurants and nightclubs, and in some open-air public places such as playgrounds.

Some studies have analysed the impact of these two Spanish laws on smoking prevalence. However, most have been based on health surveys<sup>13,17-20</sup> and surveys of hospitality workers.<sup>21,22</sup> Moreover, some studies evaluate only the partial law,<sup>13,17,18</sup> whereas others analyse the compound impact of both laws.<sup>19,20,23,24</sup> The results of these studies are often conflicting; while some conclude that the partial SFL does not have any effect on the downward trend in the prevalence of smokers,<sup>13,19,23</sup> other studies show a reduction in smoking prevalence<sup>24</sup>, an increase of the smoking quit-ratio in the short term<sup>18</sup> and minor increases in the prevalence of active smoking.<sup>20</sup>

1  
2  
3 Only one study conducted in primary health care (PHC) patients evaluates the impact of the Spanish partial SFL, including  
4 smoking prevalence in active smoker workers that attended PHC visits; one month after the implementation of the law, a  
5 9.5% decline of smokers was observed.<sup>25</sup> To our knowledge, no studies have been published on the impact of the Spanish  
6 comprehensive SFL in all adult PHC patients. In view of the pivotal role of PHC services in smoking habits, we consider that  
7 the information registered in PHC records is a good proxy to generate up-to-date evidence and to evaluate the impact of  
8 comprehensive SFL in the general population.  
9  
10  
11

12  
13  
14 We hypothesized that Law 42/2010 does not only reduce exposure to environmental cigarette smoke and its harmful  
15 effects but crucially, it promotes smoking denormalisation in society, thus encouraging smokers to quit or reduce  
16 consumption and discouraging non-smokers from initiating this habit. Accordingly, the aim of this study was to examine the  
17 impact of the Spanish comprehensive SFL (Law 42/2010) on the prevalence and incidence of adult smoking in PHC patients  
18 in three regions (Catalonia, Navarre and Balearic Islands), during the 2008-2013 period, overall and stratified by sex.  
19  
20  
21

## 22 23 **METHODS**

### 24 **Design, study participants and information source**

25  
26 Longitudinal observational study of the adult population assigned to 66 Primary Health Care teams (PHCT) in three Spanish  
27 regions: Catalonia, Navarre and the Balearic Islands (22 PHCT per region). Inclusion criteria of the PHCT were: 1)  
28 computerization of electronic health records (EHR) by January 1, 2005 in Catalonia and Navarre, and 2008 in the Balearic  
29 Islands; and 2) agreement to participate in the study by over 80% health-care professionals working in each PHCT. Random  
30 cluster sampling was stratified by region, with the PHCT as randomization unit.<sup>26</sup> In each PHCT, General Practitioners (GP)  
31 with a patient list between 400 and 3000 were selected. GP with shorter patient lists were accepted if it was their first year  
32 in the PHCT.  
33  
34  
35  
36  
37

38  
39 The study period included from the first quarter of 2008 to the fourth quarter of 2013 in Catalonia and Navarre; and from  
40 the second quarter of 2010 to the fourth quarter of 2013 in the Balearic Islands. The study started in 2008 to obtain data  
41 from the 2 years prior analysis, a requirement to adequately construct the variable ex-smoker. In the case of the Balearic  
42 Islands, the study started later to ensure reliability of data.  
43  
44  
45

46  
47 Inclusion criteria for patients were: 1) Population allocated to the selected PHCT for the whole 2007-2013 period in  
48 Catalonia and Navarre; in the Balearic Islands, patients allocated to the selected PHCT in 2013 and evaluated retrospectively  
49 (no historical annual comprehensive register of allocation of patients was available). 2) Age  $\geq 16$  and  $\leq 100$  years in 2007 in  
50 Catalonia and Navarre, and 2010 in the Balearic Islands. 3) In order to have data in the EHR collected during the study  
51 period, a minimum of one visit to their PHCT during the 2007-2013 period in Catalonia and Navarre and 2010-2013 in the  
52 Balearic Islands; and 4) Information on smoking habit recorded in the EHR for the quarter prior to the onset of the study:  
53 last quarter of 2007 in Catalonia and Navarre and first quarter of 2010 in the Balearic Islands, to enable the adequate  
54  
55  
56  
57  
58  
59  
60

1  
2  
3 construction of the various variables. Since smoking is not an acute condition, this information was considered valid until  
4 new information was entered. Thus, closed cohorts (with fixed membership, where nobody is added nor excluded after the  
5 study begins) were constituted in the three regions. Figure 1 shows the flowchart of the study.  
6  
7

8  
9 Data were retrieved from the REGIPREV database,<sup>26</sup> which contains encrypted and anonymized clinical information  
10 recorded in the EHR by these 66 PHCT. An algorithm was applied to extract equivalent data from the health records  
11 software used in each region: "ECAP" in Catalonia, "Atenea" in Navarre and "e-siap" in the Balearic Islands. Codes of the  
12 International Classification of Diseases, 9th revision in the Balearic Islands (ICD-9) and 10th in Catalonia (ICD 10<sup>th</sup> revision)<sup>27</sup>  
13 and the International Classification of Primary Care, Second edition, in Navarre (ICPC-2)<sup>28</sup> were used.  
14  
15  
16  
17

### 18 **Variables**

19  
20 Information on smoking is registered in the electronic health records using diagnostic codes to classify diseases (codes  
21 F17.0 to F17.9 and Z72.0 of the ICD-10, 305.1 of the ICD-9 and P17 of the ICPC-2), and also clinical variables (number of  
22 cigarettes per day, history of smoking, history of advice for smoking cessation). This information is stored with the entry  
23 date (Supplementary File Table S1). With the information on smoking status and entry date we created the following  
24 dependent variables at the end of each quarter of the study period:  
25  
26

- 27 - Smoking status (three categories): 1) non-smoker: patient that has never been a tobacco consumer, 2) smoker: tobacco  
28 consumer or patient that has quit smoking for less than 12 months; and 3) ex-smoker: patient who used to smoke but  
29 has quit smoking for at least 12 continuous months. When the EHR did not contain a new entry related to smoking  
30 status (diagnostic codes or clinical variables), we considered that no changes in smoking status had taken place and  
31 thus that the last observation was still valid.  
32
- 33 - New smoker: patient non-smoker for the 12 months prior to the considered quarter that has started smoking during  
34 said quarter.  
35
- 36 - New ex-smoker: the patient was a smoker two years before the considered quarter and has continuously abstained  
37 from tobacco for at least 12 months.  
38
- 39 - Ex-smoker relapse: patient ex-smoker during the 12 months prior to the considered quarter that has started smoking  
40 again during said quarter.  
41  
42  
43

44 For higher accuracy in prevalence and incidence changes, quarterly estimates were calculated.  
45  
46

47 The following variables of each patient were collected at baseline (2008 in Catalonia and Navarre; 2010 in the Balearic  
48 Islands): age, sex (male/female), annual number of health problems and annual number of PHC visits. The number of health  
49 problems was used as a morbidity indicator; it was calculated as the sum of the number of different active health problems  
50 (chronic and acute, coded by ICPC-2).  
51  
52  
53

### 54 **Data analyses**

55  
56  
57  
58  
59  
60

1  
2  
3 Descriptive statistics were used to summarize overall information. Categorical variables were expressed as percentage, and  
4 continuous variables as mean (standard deviation) or median (interquartile range [IQR]).  
5  
6

7  
8 Because the three regions used different EHR systems (different standards and computer programs), have different  
9 socioeconomic characteristics, different complementary measures to the SFL and also due to the shorter study period in the  
10 Balearic Islands, we performed a stratified analysis per region, overall and by sex. Age-standardized prevalence (non-  
11 smokers, smokers and ex-smokers) and incidence (new smokers, new ex-smokers and ex-smoker relapse) rates were  
12 calculated for each quarter using the direct method, and based on the European Standard Population (rates per 10,000  
13 inhabitants).  
14  
15

16  
17  
18 Joinpoint analysis was used to analyse the trends of age-standardized prevalence (smokers and ex-smokers) and incidence  
19 rates (new smokers, new ex-smokers and ex-smoker relapse) and to identify the best-fitting points (the 'joinpoints', in  
20 calendar quarters) where the rate changes significantly in the linear slope of the temporal trend. Significant changes include  
21 changes in direction or in the rate of increase or decrease<sup>29</sup>. Joinpoint analysis estimates the magnitude of the increase or  
22 the decrease observed in each specified time interval by estimating the annual percentage change (APC). In addition,  
23 temporal trends were expressed as the average annual percent change (AAPC), computed to summarize and compare these  
24 trends over the entire time period. Because the outcomes originate from repeated measurements, control for the  
25 autocorrelation errors was used. Ninety-five percent confidence intervals (95% CI) of APC and AAPC were calculated. The  
26 trend of non-smoker prevalence rates was not calculated because the study consisted of a closed cohort where no new  
27 participants are recruited, and thus the prevalence of non-smokers can either remain the same or decrease, but never  
28 increase.  
29  
30  
31  
32  
33  
34  
35

36  
37 Analyses were performed using Stata/SE version 14.2 for Windows (Stata Corp. LP, College Station, Texas, US). The joinpoint  
38 regression analysis was carried out using the joinpoint software from the Surveillance Research Program of the US National  
39 Cancer Institute [ref. Joinpoint Regression Program, Version 4.6.0. April, 2018; Statistical Research and Applications Branch,  
40 National Cancer Institute] (National Cancer Institute. Statistical Research and Applications Branch) [On-line:  
41 <https://surveillance.cancer.gov/branches/srab/>].  
42  
43  
44  
45

#### 46 **Patient and public involvement**

47 Study participants were not involved in the development of the research question or the outcome measures nor the design  
48 of the study. The results will be presented to citizens through informative activities and the media.  
49  
50

#### 51 **RESULTS**

52  
53 The study population was 392,966 patients: 141,071 in Catalonia, 73,644 in Navarre and 178,251 in the Balearic Islands  
54 (Figure 1). At the onset of the study, the mean age was 50.4 years in Catalonia, 54.0 in Navarre and 47.7 in the Balearic  
55 Islands.  
56  
57  
58  
59

Islands. In the three cohorts more than half were women (>51 %). Catalonia presented the highest median number of visits (9, IQR: 3 -16) and the Balearic Islands presented the highest number of recorded active health problems per patient (median 10, IQR: 6-16) (Table 1).

**Table 1: Characteristics of the cohort study population by region at the onset of the study (2008 in Catalonia and Navarre, 2010 in the Balearic Islands).**

|                                                    | Catalonia<br>N =141,071             | Navarre<br>N = 73,644             | Balearic Islands<br>N =178,251      | Abbreviations:<br>SD,<br>standard<br>deviation;<br>IQR,<br>interquartile<br>range.<br>Patient<br>s |
|----------------------------------------------------|-------------------------------------|-----------------------------------|-------------------------------------|----------------------------------------------------------------------------------------------------|
| Age (years), SD                                    | 50.37 (17.23)                       | 54.04 (18.26)                     | 47.65 (17.56)                       |                                                                                                    |
| Sex (female), number (%)                           | 72340 (51.28)                       | 37898 (51.46)                     | 94164 (52.83)                       |                                                                                                    |
| Number of visits, mean (SD); median (IQR)          | 11.69 (12.19);<br>9.00 (3.00-16.00) | 8.93 (9.30);<br>7.00 (3.00-12.00) | 11.01 (13.25);<br>7.00 (3.00-15.00) |                                                                                                    |
| Number of health problems, mean (SD); median (IQR) | 6.23 (4.58);<br>5.00 (3.00-8.00)    | 9.95 (5.39);<br>9.00 (6.00-13.00) | 11.85 (7.74);<br>10.00 (6.00-16.00) |                                                                                                    |

belonged to 22 Primary Health Care Teams in each region.

The **overall standardized smoker prevalence rates** per 10,000 inhabitants were of similar magnitude in the three regions (ranges of 3579.2 - 4138.9 in Catalonia; 3719.8 - 4034.2 in Navarre; and 3787.4 - 4029.7 in the Balearic Islands). The prevalence rate decreased in Navarre during the whole study period, decreased in the Balearic Islands in most quarters, and also in Catalonia except for the last year. These rates were higher for men than for women in all regions (Supplementary File Tables S2-S7). A significant downward **overall trend of smoker prevalence rates** was found in Catalonia (AAPC= -2.18), Navarre (AAPC= -1.44) and the Balearic Islands (AAPC= -1.75); this downward trend was higher for men than for women in the three regions. In Catalonia, the most significant reduction occurred during the period 2010.3-2011.4 (APC= -6.75), similarly to the Balearic Islands (2010.2-2012.4; APC= -2.19), whereas in Navarre it occurred between 2008.1-2013.4 (APC= -1.44) (Tables 2, 3, 4, Supplementary File Figure S1).

For the whole period, the **overall standardized ex-smoker prevalence rates** per 10,000 inhabitants increased in Navarre, in the Balearic Islands and in Catalonia except for the last year. The rates in Catalonia were higher (ranges of: 1168.5 - 1781.2 in Catalonia; 313.3 - 764.1 in Navarre; and 559.3 - 914.1 in the Balearic Islands). The standardized ex-smoker prevalence rates were higher for men than for women in all regions (Supplementary File Tables S2-S7). The **overall trend of ex-smoker prevalence rates** increased significantly in the three regions throughout the study period but was higher in Navarre (Navarre AAPC= 16.67; Catalonia AAPC= 7.19; Balearic Islands AAPC= 14.96). The increase in the prevalence rate of ex-smokers was higher for the 2008.1-2008.2 period in Catalonia, 2008.1-2008.4 in Navarre, and for 2010.2-2012.2 in the Balearic Islands, and higher in women in the three regions (women: Catalonia AAPC= 10.87; Navarre AAPC=17.30 and Balearic Islands AAPC= 19.51) (Tables 2, 3, 4, Supplementary File Figure S1).



1  
2  
3  
4  
5 The **overall new smoker standardized incidence rates** per 10,000 inhabitants showed low values in the three regions  
6 (ranges of 7.9 - 26.8 in Catalonia; 9.5 - 30.9 in Navarre; 1.6 - 17.5 in the Balearic Islands) and higher for men than for women  
7 in Catalonia and Navarre (Supplementary File Tables S2-S7). The **overall trend of new smoker incidence rates** decreased  
8 significantly in Catalonia (AAPC= -10.39) and Navarre (AAPC= -9.49); additionally, the decline was similar for men and  
9 women. In contrast, the overall trend remained stable in the Balearic Islands despite a decrease until 2012.4 (APC= -46.20)  
10 and a considerable increase from 2012.4 to 2013.4 (APC= 1054.2) (Tables 2, 3, 4, Supplementary File Figure S2).  
11  
12  
13  
14

15 The **overall standardized new ex-smoker incidence rates** per 10,000 inhabitants showed higher values in Catalonia (range:  
16 110.7 - 317.6) than in Navarre (range: 48.6 - 181.0) and the Balearic Islands (range: 93.7 - 188.1) (Supplementary File Tables  
17 S2-S7). The **overall trend of new ex-smoker incidence rates** showed a significant decrease in Catalonia (AAPC= -7.27) and  
18 especially in the Balearic Islands (AAPC= -11.24). This downward trend was higher for men than for women in Catalonia and  
19 the Balearic Islands (Tables 2, 3, 4, Supplementary File Figure S2).  
20  
21  
22  
23

24 The **overall standardized ex-smoker relapse incidence rates** per 10,000 inhabitants presented higher values in the Balearic  
25 Islands (range: 103.9 - 576.6) than in Catalonia (range: 70.7 - 334.5) and Navarre (range: 58.6 - 230.3) (Supplementary File  
26 Tables S2-S7). The **overall trend of ex-smoker relapse incidence rates** showed significant increases in Catalonia (AAPC=  
27 18.60), particularly in women (AAPC= 14.56), although a decrease from 2008.1 to 2012.3 was observed (APC= -8.40). In  
28 contrast, Navarre showed significant decreases (AAPC= -11.42)(Tables 2, 3, 4, Supplementary File Figure S2).  
29  
30  
31  
32  
33  
34  
35  
36  
37  
38  
39  
40  
41  
42  
43  
44  
45  
46  
47  
48  
49  
50  
51  
52  
53  
54  
55  
56  
57  
58  
59  
60

1  
**Table 2. Trends in prevalence of smoking status and incidence of new smokers, ex-smokers and ex-smoker relapse for age standardized rates. Jointpoints overall and by sex in CATALONIA. N=141,071 (2008-2013)**

|                                     | Trend 1         |                                      | Trend 2         |                                      | Trend 3         |                                     | Trend 4         |                                      | Trend 5         |                                    | AAPC (95% IC)<br>2008.1 - 2013.4     |
|-------------------------------------|-----------------|--------------------------------------|-----------------|--------------------------------------|-----------------|-------------------------------------|-----------------|--------------------------------------|-----------------|------------------------------------|--------------------------------------|
|                                     | Time            | APC (95% IC)                         | Time            | APC (95% IC)                         | Time            | APC(95% IC)                         | Time            | APC (95% IC)                         | Time            | APC (95% IC)                       |                                      |
| <b>Smoker prevalence</b>            |                 |                                      |                 |                                      |                 |                                     |                 |                                      |                 |                                    |                                      |
| 8                                   | 2008.1 - 2010.3 | -0.72 <sup>d</sup> (-1.51 ; 0.09)    | 2010.3 - 2011.2 | -9.85 <sup>b</sup> (-16.24 ; -2.98)  | 2011.2 - 2013.4 | -0.53 <sup>d</sup> (-1.29 ; 0.24)   |                 |                                      |                 |                                    | -1.88 <sup>a</sup> (-2.85 ; -0.90)   |
| 9                                   | 2008.1 - 2010.3 | -2.12 <sup>a</sup> (-2.52 ; -1.71)   | 2010.3 - 2011.2 | -8.17 <sup>a</sup> (-11.24 ; -4.99)  | 2011.2 - 2012.4 | -2.93 <sup>a</sup> (-3.88 ; -1.98)  | 2012.4 - 2013.4 | 2.81 <sup>a</sup> (1.47 ; 4.17)      |                 |                                    | -2.31 <sup>a</sup> (-2.83 ; -1.79)   |
| 10                                  | 2008.1 - 2010.3 | -1.71 <sup>b</sup> (-2.88 ; -0.53)   | 2010.3 - 2011.4 | -6.75 <sup>b</sup> (-10.46 ; -2.89)  | 2011.4 - 2013.4 | 0.19 <sup>d</sup> (-1.37 ; 1.78)    |                 |                                      |                 |                                    | -2.18 <sup>a</sup> (-3.22 ; -1.13)   |
| <b>Ex-smoker prevalence</b>         |                 |                                      |                 |                                      |                 |                                     |                 |                                      |                 |                                    |                                      |
| 12                                  | 2008.1 - 2008.4 | 17.54 <sup>a</sup> (12.88 ; 22.40)   | 2008.4 - 2011.2 | 11.25 <sup>a</sup> (10.17 ; 12.34)   | 2011.2 - 2012.1 | 15.73 <sup>a</sup> (9.03 ; 22.85)   | 2012.1 - 2013.1 | 9.55 <sup>a</sup> (5.91 ; 13.31)     | 2013.1 - 2013.4 | 0.65 <sup>d</sup> (-2.49 ; 3.89)   | 10.87 <sup>a</sup> ( 9.68 ; 12.07)   |
| 13                                  | 2008.1 - 2012.4 | 6.64 <sup>a</sup> (6.01 ; 7.30)      | 2012.4 - 2013.4 | 4.45 <sup>c</sup> (-8.23 ; -0.51)    |                 |                                     |                 |                                      |                 |                                    | 4.63 <sup>a</sup> (3.79 ; 5.48)      |
| 14                                  | 2008.1 - 2008.2 | 16.70 <sup>b</sup> (7.23 ; 27.01)    | 2008.2 - 2011.1 | 7.63 <sup>a</sup> (6.96 ; 8.30)      | 2011.1 - 2012.4 | 9.68 <sup>a</sup> (8.50 ; 10.86)    | 2012.4 - 2013.4 | -2.34 <sup>c</sup> (-4.21 ; -0.42)   |                 |                                    | 7.19 <sup>a</sup> (6.31 ; 8.07)      |
| <b>New smokers incidence</b>        |                 |                                      |                 |                                      |                 |                                     |                 |                                      |                 |                                    |                                      |
| 16                                  | 2008.1 - 2013.4 | -10.82 <sup>c</sup> (-19.17 ; -1.59) |                 |                                      |                 |                                     |                 |                                      |                 |                                    | -10.82 <sup>c</sup> (-19.17 ; -1.59) |
| 17                                  | 2008.1 - 2013.4 | -10.53 <sup>b</sup> (-16.03 ; -4.68) |                 |                                      |                 |                                     |                 |                                      |                 |                                    | -10.53 <sup>b</sup> (-16.03 ; -4.68) |
| 18                                  | 2008.1 - 2013.4 | -10.39 <sup>b</sup> (-16.06 ; -4.33) |                 |                                      |                 |                                     |                 |                                      |                 |                                    | -10.39 <sup>b</sup> (-16.06 ; -4.33) |
| <b>New ex-smokers incidence</b>     |                 |                                      |                 |                                      |                 |                                     |                 |                                      |                 |                                    |                                      |
| 21                                  | 2008.1 - 2013.4 | -4.55 <sup>d</sup> (-11.06 ; 2.45)   |                 |                                      |                 |                                     |                 |                                      |                 |                                    | -4.55 <sup>d</sup> (-11.06 ; 2.45)   |
| 22                                  | 2008.1 - 2013.4 | -7.80 <sup>c</sup> (-13.44 ; -1.79)  |                 |                                      |                 |                                     |                 |                                      |                 |                                    | -7.80 <sup>c</sup> (-13.44 ; -1.79)  |
| 23                                  | 2008.1 - 2013.4 | -7.27 <sup>c</sup> (-12.89 ; -1.29)  |                 |                                      |                 |                                     |                 |                                      |                 |                                    | -7.27 <sup>c</sup> (-12.89 ; -1.29)  |
| <b>Ex-smokers relapse incidence</b> |                 |                                      |                 |                                      |                 |                                     |                 |                                      |                 |                                    |                                      |
| 25                                  | 2008.1 - 2012.3 | -9.20 <sup>d</sup> (-18.05 ; 1.03)   | 2012.3 - 2013.4 | 162.73 <sup>a</sup> (67.31 ; 312.56) |                 |                                     |                 |                                      |                 |                                    | 14.56 <sup>c</sup> (1.65 ; 29.11)    |
| 26                                  | 2008.1 - 2009.3 | -47.47 <sup>d</sup> (-81.34 ; 47.84) | 2009.3 - 2013.4 | 115.64 <sup>d</sup> (-100 ; 1930603) | 2010.2 - 2012.3 | -27.20 <sup>d</sup> (-44.70 ; 1.35) | 2012.3 - 2013.2 | 515.1 <sup>d</sup> (-80.2 ; 18963.4) | 2013.2 - 2013.4 | 77.79 <sup>d</sup> (-72.27 ; 1040) | 9.97 <sup>d</sup> (-64.32 ; 238.91)  |
| 27                                  | 2008.1 - 2012.3 | -8.40 <sup>c</sup> (-15.98 ; -0.13)  | 2012.3 - 2013.4 | 200.54 <sup>a</sup> (120.8 ; 309.0)  |                 |                                     |                 |                                      |                 |                                    | 18.60 <sup>a</sup> (8.50 ; 29.64)    |

28 Note: 2008.\*. represents the trimester \* of the year 2008

29 APC, annual percentage change and AAPC, average annual percent change estimated by joinpoint regression analysis; CI, confidence interval; F, female; G, global; M, male.

30 <sup>a</sup>p< 0.001; <sup>b</sup> p< 0.01; <sup>c</sup> p< 0.05; <sup>d</sup> p>0.05

**Table 3. Trends in prevalence of smoking status and incidence of new smokers, ex-smokers and ex-smoker relapse for age standardized rates. Jointpoints overall and by sex in NAVARRE. N=73,644 (2008-2013)**

|                                    | Time            | Trend 1<br>APC (95% IC)              | Time            | Trend 2<br>APC (95% IC)            | Time            | Trend 3<br>APC (95% IC)           | AAPC (95% IC)<br>2008.1 - 2013.4     |
|------------------------------------|-----------------|--------------------------------------|-----------------|------------------------------------|-----------------|-----------------------------------|--------------------------------------|
| <b>Smoker prevalence</b>           |                 |                                      |                 |                                    |                 |                                   |                                      |
| F                                  | 2008.1 - 2013.4 | -0.93 <sup>a</sup> (-1.11 ; -0.75)   |                 |                                    |                 |                                   | -0.93 <sup>a</sup> (-1.11 ; -0.75)   |
| M                                  | 2008.1 - 2013.4 | -1.95 <sup>a</sup> (-2.09 ; -1.81)   |                 |                                    |                 |                                   | -1.95 <sup>a</sup> (-2.09 ; -1.81)   |
| G                                  | 2008.1 - 2013.4 | -1.44 <sup>a</sup> (-1.59 ; -1.28)   |                 |                                    |                 |                                   | -1.44 <sup>a</sup> (-1.59 ; -1.28)   |
| <b>Ex-smoker prevalence</b>        |                 |                                      |                 |                                    |                 |                                   |                                      |
| F                                  | 2008.1 - 2008.4 | 35.81 <sup>a</sup> (25.56 ; 46.90)   | 2008.4 - 2012.2 | 16.50 <sup>a</sup> (15.45 ; 17.56) | 2012.2 - 2013.4 | 10.66 <sup>a</sup> (8.31 ; 13.06) | 17.30 <sup>a</sup> (15.88 ; 18.67)   |
| M                                  | 2008.1 - 2009.2 | 25.93 <sup>a</sup> (20.68 ; 31.41)   | 2009.2 - 2012.4 | 13.90 <sup>a</sup> (12.85 ; 14.97) | 2012.4 - 2013.4 | 9.32 <sup>a</sup> (5.21 ; 13.59)  | 15.59 <sup>a</sup> (14.24 ; 16.95)   |
| G                                  | 2008.1 - 2008.4 | 34.30 <sup>a</sup> (24.61 ; 44.74)   | 2008.4 - 2012.2 | 15.80 <sup>a</sup> (14.78 ; 16.83) | 2012.2 - 2013.4 | 10.68 <sup>a</sup> (8.41 ; 12.99) | 16.67 <sup>a</sup> (15.35 ; 18.01)   |
| <b>New smokers incidence</b>       |                 |                                      |                 |                                    |                 |                                   |                                      |
| F                                  | 2008.1 - 2013.4 | -9.43 <sup>c</sup> (-15.95 ; -2.75)  |                 |                                    |                 |                                   | -9.43 <sup>c</sup> (-15.95 ; -2.75)  |
| M                                  | 2008.1 - 2013.4 | -9.40 <sup>b</sup> (-14.96 ; -3.48)  |                 |                                    |                 |                                   | -9.40 <sup>b</sup> (-14.96 ; -3.48)  |
| G                                  | 2008.1 - 2013.4 | -9.49 <sup>a</sup> (-14.31 ; -4.40)  |                 |                                    |                 |                                   | -9.49 <sup>a</sup> (-14.31 ; -4.40)  |
| <b>New ex-smokers incidence</b>    |                 |                                      |                 |                                    |                 |                                   |                                      |
| F                                  | 2008.1 - 2013.4 | -9.67 <sup>b</sup> (-15.05 ; -3.96)  |                 |                                    |                 |                                   | -9.67 <sup>b</sup> (-15.05 ; -3.96)  |
| M                                  | 2008.1 - 2013.4 | -2.83 <sup>d</sup> (-8.94 ; 3.70)    |                 |                                    |                 |                                   | -2.83 <sup>d</sup> (-8.94 ; 3.70)    |
| G                                  | 2008.1 - 2013.4 | -5.01 <sup>d</sup> (-10.74 ; 1.09)   |                 |                                    |                 |                                   | -5.01 <sup>d</sup> (-10.74 ; 1.09)   |
| <b>Ex-smoker relapse incidence</b> |                 |                                      |                 |                                    |                 |                                   |                                      |
| F                                  | 2008.1 - 2013.4 | -13.85 <sup>b</sup> (-20.68 ; -6.42) |                 |                                    |                 |                                   | -13.85 <sup>b</sup> (-20.68 ; -6.42) |
| M                                  | 2008.1 - 2013.4 | -11.77 <sup>c</sup> (-18.33 ; -4.69) |                 |                                    |                 |                                   | -11.77 <sup>c</sup> (-18.33 ; -4.69) |
| G                                  | 2008.1 - 2013.4 | -11.42 <sup>a</sup> (-16.95 ; -5.51) |                 |                                    |                 |                                   | -11.42 <sup>a</sup> (-16.95 ; -5.51) |

Note: 2008.\*. represents the trimester \* of the year 2008

APC, annual percentage change and AAPC, average annual percent change estimated by joinpoint regression analysis; CI, confidence interval; F, female; G, global; M, male.

<sup>a</sup> p< 0.001; <sup>b</sup> p< 0.01; <sup>c</sup> p< 0.05; <sup>d</sup> p>0.05

**Table 4. Trends in prevalence of smoking status and incidence of new smokers, ex-smokers and ex-smoker relapse for age standardized rates. Jointpoints overall and by sex in THE BALEARIC ISLANDS. N=178,251 (2010-2013)**

|                                     | Trend 1         |                                       | Trend 2         |                                       | Trend 3         |                                   | AAPC (95% IC)                         |
|-------------------------------------|-----------------|---------------------------------------|-----------------|---------------------------------------|-----------------|-----------------------------------|---------------------------------------|
|                                     | Time            | APC (95% IC)                          | Time            | APC (95% IC)                          | Time            | APC (95% IC)                      | 2008.1 - 2013.4                       |
| <b>Smoker prevalence</b>            |                 |                                       |                 |                                       |                 |                                   |                                       |
| F                                   | 2010.2 - 2013.4 | -1.20 <sup>a</sup> (-1.40 ; -1.01)    |                 |                                       |                 |                                   | -1.20 <sup>a</sup> (-1.40 ; -1.01)    |
| M                                   | 2010.2 - 2012.4 | -2.73 <sup>a</sup> (-2.93 ; -2.54)    | 2012.4 - 2013.4 | -1.39 <sup>b</sup> (-2.16 ; -0.65)    |                 |                                   | -2.35 <sup>a</sup> (-2.58 ; -2.12)    |
| G                                   | 2010.2 - 2012.4 | -2.19 <sup>a</sup> (-2.33 ; -1.89)    | 2012.4 - 2013.4 | -0.86 <sup>d</sup> (-1.90 ; 0.18)     |                 |                                   | -1.75 <sup>a</sup> (-2.05 ; -1.46)    |
| <b>Ex-smoker prevalence</b>         |                 |                                       |                 |                                       |                 |                                   |                                       |
| F                                   | 2010.2 - 2012.1 | 26.19 <sup>a</sup> (25.24 ; 27.15)    | 2012.1 - 2013.4 | 13.18 <sup>a</sup> (12.46 ; 13.91)    |                 |                                   | 19.51 <sup>a</sup> (18.99 ; 20.03)    |
| M                                   | 2010.2 - 2012.1 | 15.82 <sup>a</sup> (14.04 ; 17.62)    | 2012.1 - 2013.4 | 7.44 <sup>a</sup> (5.37 ; 9.56)       |                 |                                   | 12.15 <sup>a</sup> (10.96 ; 13.36)    |
| G                                   | 2010.2 - 2012.2 | 19.29 <sup>a</sup> (18.34 ; 20.24)    | 2012.2 - 2013.4 | 9.43 <sup>a</sup> (8.37 ; 10.50)      |                 |                                   | 14.96 <sup>a</sup> (14.34 ; 15.59)    |
| <b>New smokers incidence</b>        |                 |                                       |                 |                                       |                 |                                   |                                       |
| F                                   | 2010.2 - 2012.4 | -46.09 <sup>b</sup> (-60.51 ; -26.40) | 2012.4 - 2013.4 | 1370.6 <sup>b</sup> (169.9 ; 7913.0)  |                 |                                   | 38.65 <sup>d</sup> (-13.24 ; 121.58)  |
| M                                   | 2010.2 - 2012.4 | -44.29 <sup>c</sup> (-64.78 ; -11.87) | 2012.4 - 2013.4 | 610.8 <sup>b</sup> (98.1 ; 2530.4)    |                 |                                   | 15.32 <sup>d</sup> (-25.52 ; 78.56)   |
| G                                   | 2010.2 - 2012.4 | -46.20 <sup>b</sup> (-60.28 ; -27.12) | 2012.4 - 2013.4 | 1054.2 <sup>b</sup> (222.2 ; 4034.8)  |                 |                                   | 29.19 <sup>d</sup> (-11.04 ; 87.61)   |
| <b>New ex-smokers incidence</b>     |                 |                                       |                 |                                       |                 |                                   |                                       |
| F                                   | 2010.2 - 2013.4 | -11.68 <sup>c</sup> (-19.32 ; -3.31)  |                 |                                       |                 |                                   | -11.68 <sup>c</sup> (-19.32 ; -3.31)  |
| M                                   | 2010.2 - 2013.4 | -10.94 <sup>c</sup> (-20.39 ; -0.38)  |                 |                                       |                 |                                   | -10.94 <sup>c</sup> (-20.39 ; -0.38)  |
| G                                   | 2010.2 - 2013.4 | -11.24 <sup>b</sup> (-18.61 ; -3.21)  |                 |                                       |                 |                                   | -11.24 <sup>b</sup> (-18.61 ; -3.21)  |
| <b>Ex-smokers relapse incidence</b> |                 |                                       |                 |                                       |                 |                                   |                                       |
| F                                   | 2010.2 - 2012.1 | -33.75 <sup>b</sup> (-47.83 ; -15.88) | 2012.1 - 2013.1 | 47.37 <sup>d</sup> (-75.08 ; 771.40)  | 2013.1 - 2013.4 | -89.71 <sup>d</sup> (-99.7 ; 313) | -44.15 <sup>d</sup> (-74.54 ; 22.53)  |
| M                                   | 2010.2 - 2013.4 | -36.30 <sup>a</sup> (-44.63 ; -26.72) |                 |                                       |                 |                                   | -36.30 <sup>a</sup> (-44.63 ; -26.72) |
| G                                   | 2010.2 - 2013.2 | -18.19 <sup>a</sup> (-23.60 ; -12.40) | 2013.2 - 2013.4 | -95.73 <sup>d</sup> (-99.99 ; 1380.5) |                 |                                   | -46.35 <sup>d</sup> (-74.32 ; 12.09)  |

Note: 2010.\*. represents the quarter \* of the year 2010

APC, annual percentage change and AAPC, average annual percent change estimated by joinpoint regression analysis; CI, confidence interval; F, female; G, global; M, male.

<sup>a</sup> p≤ 0.001; <sup>b</sup> p≤ 0.01; <sup>c</sup> p≤ 0.05; <sup>d</sup> p>0.05

## DISCUSSION

The previous implementation of the partial Spanish SFL could account for the low effectiveness of the comprehensive SFL observed in this study. A significant downward trend of smoker prevalence rates, higher in men than in women, was found in the three regions throughout the study period. Correspondingly, the trend of ex-smoker prevalence rates increased in the three regions, particularly in Navarre and during the period 2008.1-2008.2 in Catalonia, 2008.1-2008.4 in Navarre, and the period 2010.2-2012.2 in the Balearic Islands. Even though the standardized ex-smoker prevalence rate was higher for men, the increase in the trend of ex-smoker prevalence rate was higher in women in the three regions. The overall trends of new smoker incidence rates decreased significantly in Catalonia and Navarre and were similar for men and women. Also, the overall trends of new ex-smokers decreased significantly in Catalonia and the Balearic Islands, particularly for men. In addition, the overall trends of ex-smoker relapse increased in Catalonia and decreased in Navarre, more for women than for men in both cases.

The trends of smoker prevalence declined throughout the study and no changes were observed after the implementation of the comprehensive SFL. Indeed, the most significant decrease begins in 2010 in Catalonia (3<sup>rd</sup> quarter) and the Balearic Islands and in 2008 in Navarre, prior to the implementation of the comprehensive SFL (January 1, 2011). However, the trend in Catalonia shows a drop in the prevalence rate of smokers around the time of the implementation of the Law. In contrast, trends in Navarre and the Balearic Islands show a more progressive decline. Comparisons are difficult due to the lack of studies on smoking prevalence and incidence from a PHC perspective and because some studies evaluate the impact of SFL on smoking prevalence with surveys that use different methodologies. Two studies that analysed data from surveys to the general population<sup>19,20</sup> did not find a significant decrease in the prevalence of smokers after the Spanish comprehensive law. In contrast, Lidón *et al.*<sup>24</sup> showed that after the implementation of both Spanish SFL, a significant decrease was observed in the smoking prevalence (from 34.5% to 26.1%, Prevalence Ratio = 0.76,  $p < 0.001$ ) of people 16 years of age and older living in Barcelona surveyed in 2004–2005 and followed-up in 2013–2014. In addition, National Health Survey data from the 1987-2005 period revealed an annual average absolute decline of 1.0% in the prevalence of male smokers, whereas women showed an annual average absolute increase in prevalence of 0.2%. Between 2006 and 2014, the prevalence of smokers declined annually by 0.7% in men and 0.5% in women.<sup>23</sup> Although the values of the current study are higher, the steeper decline in the prevalence of smokers in men agree with these data.<sup>23</sup> Also, one study that estimated the effect of the Spanish SFL for the 2012-2025 period predicted a decrease in smoking prevalence in all age groups and for both sexes, except for women aged 40–64.<sup>30</sup>

Concomitantly with the decline in the prevalence trends in smokers, a constant increase of prevalence trends in ex-smokers was observed in the three regions. Other studies failed to note a significant change in the prevalence of ex-smokers after the comprehensive SFL: a difference of only 0.3 % between 2007 and 2011<sup>20</sup> and a non-significant increase of 3.3% between 2006 and 2011.<sup>19</sup> In agreement with a recent evidence review,<sup>23</sup> we observed a higher increase in the trend of ex-smokers prevalence in women. This review showed that the rate of smoking cessation in men increased 0.9% annually during the

1  
2  
3 1987-2014 period, and 1.5% in women after the Partial SFL came into force. The later incorporation of women to smoking  
4 might explain these gender differences. We should underscore that other studies that use health surveys as information  
5 source have a higher prevalence of ex-smokers than the prevalence we obtained in this study, especially for Navarre and  
6 the Balearic Islands.<sup>31</sup> This discrepancy could be explained by the misclassification of long-term ex-smokers as non-smokers  
7 during the process of computerization of medical records in the cases where the smoking habit was not sufficiently  
8 investigated.<sup>32</sup>  
9  
10  
11

12  
13  
14 We observed a gradual decline in the new smoker incidence trends in Catalonia and Navarre throughout the study period,  
15 whereas incidence trends remained stable in the Balearic Islands (possibly due to the shorter study period or lower rates). A  
16 review by Wilson *et al.*<sup>33</sup> of two studies that evaluated smoking initiation reported mixed results, while Guerrero *et al.*<sup>34</sup>  
17 concluded that the Spanish partial SFL had no effect on new smokers in 2009. In contrast, Pinilla and Abásolo<sup>35</sup> observed a  
18 6% decrease in the rate of smoking initiation among young people after the implementation of the same law, with a more  
19 positive impact in higher socioeconomic strata. We have not found studies that evaluate the impact of the comprehensive  
20 SFL on the incidence of new smokers. However, our data show a continuation in the trend observed in Pinilla's study<sup>35</sup> on  
21 the impact of the partial law.  
22  
23  
24  
25

26  
27  
28 The incidence trend in new ex-smokers declined gradually throughout the study period in Catalonia and the Balearic  
29 Islands. While the literature to date lacks data on the effect of the SFL on the incidence of new ex-smokers, it provides  
30 some information on prevalence. In this respect, one study on the Spanish partial SFL observed an increase of 8% between  
31 2006 and 2011 in the rate of cessation among adult smokers (age 21 years and older) according to data from the National  
32 Health Survey.<sup>35</sup> In Luxembourg, smoking cessation attributed to the SFL was higher among daily smokers with a higher  
33 socioeconomic status.<sup>8</sup> In our cohort, we observed apparent random increases and declines in the adjusted rates in the  
34 three regions throughout the study.  
35  
36  
37

38  
39  
40 The incidence trend in ex-smoker relapses increased in Catalonia and declined in Navarre constantly throughout the whole  
41 period, particularly for women, but the overall trend remained stable in the Balearic islands (most likely because of the  
42 shorter study period). However, the literature presents conflicting results regarding smoking relapse. One study on the  
43 partial Spanish SFL observed that most people who had succeeded in giving up smoking in 2006 had not relapsed by 2009.<sup>34</sup>  
44 On the other hand, a quasi-experimental study conducted in the United States observed that relapse was similar between  
45 employees in workplaces with SFL and employees where smoking was permitted.<sup>36</sup> In contrast, Shang found that a  
46 comprehensive SFL in bars significantly deters smoking relapse among people ages 21 and older.<sup>37</sup> According to Buczkowski  
47 *et al.*,<sup>38</sup> the main reasons for relapse are stress, missing the pleasure obtained from smoking and the smoking environment.  
48 Other factors not analysed in our study that might influence relapse rates could explain the variations between regions, for  
49 instance living with other smokers, being enrolled in work or clinics cessation programmes<sup>39</sup> or the region-specific  
50 complementary measures to the SFL (for instance, Foral Law 6/2003,<sup>40</sup> February 14, of smoking prevention, protection from  
51  
52  
53  
54  
55  
56  
57  
58  
59  
60

1  
2  
3 secondhand tobacco smoke and promotion of health with regard to smoking in Navarre). In addition, we should consider  
4 the impact of the financial crisis during the study period and the subsequent increase of anxiety and depression in the  
5 population.<sup>41</sup> In this respect, Navarre was the region with the lowest unemployment rate in Spain according to the 2010  
6 Economically Active Population Survey (unemployment of 11.6% in Navarre, versus 18.0% in Catalonia and 22.2% in the  
7 Balearic Islands). According to the 2009 European Health Survey in Spain, these unemployment figures correlate with the  
8 prevalence of chronic depression, which was of 3.4% in Navarre versus 5.4% in Catalonia and 7.0% in the Balearic Islands.  
9  
10  
11  
12

13  
14 The SFL is a keystone of the WHO Framework Convention on Tobacco Control (FCTC) and the MPOWER policy package  
15 (M=Monitor; P=Protect; O=Offer; W=Warm; E=Enforce; R= Raise).<sup>42</sup> The enforcement of Laws 28/2005 and 42/2010 have  
16 significantly advanced smoking control in Spain, in particular the “Protect people from tobacco” strategy. However, the  
17 remaining MPOWER strategies have been patchily implemented and require further development.<sup>23</sup> On balance, a  
18 combination of specific, feasible, pragmatic, sufficiently funded policies and interventions aimed at populations and  
19 individuals is essential to achieve progress regarding smoking behaviour.  
20  
21  
22  
23

#### 24 **Limitations and strengths of the study**

25  
26 It is important to take into account that other than the Law, the pattern of tobacco consumption is influenced by factors  
27 such as health interventions, level of education, age, civil status, having children and being unemployed.<sup>43</sup> However, this  
28 study only considered age, sex, number of health problems and number of PHC visits since other variables were not  
29 available. In addition, many patients were excluded from the study because of lack of baseline data on smoking (missing  
30 data is a common problem in studies based on EHR). In order to prevent bias caused by improved smoking records, we  
31 excluded the cases with no information at the beginning of the study. The selection criteria and the longitudinal design  
32 aimed to maximize the internal validity of the study. Moreover, young people might be underrepresented due to their  
33 lower use of PHC services. On the other hand, 70% of the population attends PHC services at least once a year and smokers  
34 attend more frequently than no smokers.<sup>44</sup> In view of the limited length of the study period, particularly in the Balearic  
35 Islands, we consider these results a first approximation to be succeeded by follow-up research. We should underscore that  
36 rather than just comparing two different periods, joinpoint analysis evaluates longitudinal trends, thus producing a more  
37 accurate assessment. The following characteristics of the study were taken into consideration: scarcity of data prior to the  
38 implementation of the SFL; delayed changes in smoking status; possibility of detecting more than one change in smoking  
39 trends; and influence of unanticipated factors. While other statistical models could have been used, we believe that  
40 joinpoint is a suitable method to achieve the study objectives, as shown in previous studies.<sup>45-47</sup>  
41  
42  
43  
44  
45  
46  
47  
48  
49  
50

51 This study provides useful data on the impact of the Spanish comprehensive SFL on adult smoking behaviour in PHC  
52 patients. It is crucial to analyse the consequences of a public health law on PHC users. Primary health care has a pivotal role  
53 in smoking cessation because it is the gatekeeper of the health services, it is accessible and provides continuity of care to  
54 smokers.<sup>48</sup> We should also highlight that this study includes the evaluation of novel variables such as incidence of new  
55  
56  
57  
58  
59  
60

1  
2  
3 smokers, new ex-smokers and ex-smoker relapse, which we consider of great relevance in relation to PHC interventions for  
4 smoking cessation. Used as a research tool, EHR portray real-life conditions and provide comprehensive, long-term health  
5 histories from a large population sample, ensure high representativeness and external validity and minimize potential recall  
6 bias. The results are only generalizable to PHC users. To our knowledge, this study is amongst the first to show quarterly  
7 data from EHR.  
8  
9  
10

## 11 12 **CONCLUSIONS**

13  
14 The introduction of the Spanish comprehensive SFL (Law 42/2010) does not significantly modify incidence and prevalence  
15 trends of smoking behaviour in PHC adult patients in Catalonia, Navarre and the Balearic Islands. The impact of the  
16 comprehensive SFL might have been lessened by the effect of the previous implementation of the partial SFL (Law  
17 28/2005). The current article provides baseline data for future research into the effectiveness of this Law. In addition to  
18 specific factors associated with smoking behaviour (such as the price of a pack of cigarettes or funding of smoking cessation  
19 services), future studies should consider socio-economic status and age groups.  
20  
21  
22  
23  
24  
25

26 **Acknowledgements:** We thank all professionals of the 66 PHC teams who volunteered to participate in the study. The  
27 authors would also like to thank Josep M Elorza-Ricart, Magdalena Rosell-Murphy, Lluís Martínez, Javier Baquedano, Javier  
28 Arranz, M<sup>a</sup> Ángeles Nuin and Carlos Martín-Cantera for their collaboration. Also Eulàlia Farré for the English translation.  
29 This article forms part of the doctoral dissertation of Yolanda Rando-Matos at the Universitat Autònoma de Barcelona  
30 (Department of Medicine of the Autonomous University of Barcelona).  
31  
32  
33  
34

35 **Contributors:** BB, TRB, MPV, JBM, and CVF designed the study and wrote the protocol. YRM, MPV and JBM conducted  
36 literature searches and provided summaries of previous research studies. BB, JLL, JM, JR and MPV obtained the data. TRB  
37 and TLJ conducted the statistical analysis. All authors contributed to the interpretation of the results. YRM and MPV wrote  
38 the first draft of the manuscript. All authors read, contributed and approved the final version of the manuscript.  
39  
40  
41

42 **Funding:** This project has been funded by the Carlos III Health Institute (Ministry of Economy and Competitiveness, Spain)  
43 with a grant for research projects on health (PI11/01413) through the Network for Prevention and Health Promotion in  
44 Primary Care (rediAPP, RD12/0005/0001; RD16/0007/0001), and by European Union ERDF funds. The funder had no role in  
45 the study design, collection, analysis or interpretation of the data, writing of the manuscript, or the decision to submit the  
46 paper for publication.  
47  
48  
49  
50

51 **Competing interest:** The authors declare no conflict of interest.  
52  
53  
54  
55  
56  
57  
58  
59  
60



1  
2  
3 **Ethical aspects:** This study follows the tenets of the Helsinki Declaration and of Good Clinical Research Practice and has  
4 been approved by the Ethical and Clinical Research Committee of the IDIAP Jordi Gol. Confidentiality was guaranteed  
5 through data encryption and anonymization in agreement with the data confidentiality Law 15/1999.  
6  
7

8  
9 **Data sharing statement:** No additional data are available.  
10

11  
12 **Figure 1: Flow-chart of patients included in the study, by region.**  
13  
14  
15  
16  
17  
18  
19  
20  
21  
22  
23  
24  
25  
26  
27  
28  
29  
30  
31  
32  
33  
34  
35  
36  
37  
38  
39  
40  
41  
42  
43  
44  
45  
46  
47  
48  
49  
50  
51  
52  
53  
54  
55  
56  
57  
58  
59  
60

## REFERENCES

1. Jha P. Avoidable global cancer deaths and total deaths from smoking. *Nat Rev Cancer* 2009;9:655–64.
2. Murray CJL, Lopez AD. Alternative projections of mortality and disability by cause 1990–2020: Global Burden of Disease Study. *Lancet* 2017;349:1498–504.
3. World Health Organization, and Tobacco Free Initiative. Building blocks to tobacco control: a hand-book. (Tools for advancing tobacco control in the 21st century). Geneva: WHO; 2004.
4. Federico B, Mackenbach JP, Eikemo TA, *et al*. Impact of the 2005 smoke-free policy in Italy on prevalence, cessation and intensity of smoking in the overall population and by educational group. *Addiction* 2012;107:1677–86.
5. Hahn EJ, Rayens MK, Butler KM, *et al*. Smoke-free laws and adult smoking prevalence. *Prev Med* 2008;47:206–9.
6. Nagelhout GE, Willemsen MC, de Vries H. The population impact of smoke-free workplace and hospitality industry legislation on smoking behaviour. Findings from a national population survey. *Addiction* 2011;106:816–23.
7. Hublet A, Schmid H, Clays E, *et al*. Association between tobacco control policies and smoking behaviour among adolescents in 29 European countries. *Addiction* 2009;104:1918–26.
8. Tchicaya A, Lorentz N, Demarest S. Socioeconomic inequalities in smoking and smoking cessation due to a smoking ban: General population-based cross-sectional study in Luxembourg. *PLoS One* 2016;11:1–15.
9. Ye X, Chen S, Yao Z, *et al*. Smoking behaviors before and after implementation of a smoke-free legislation in Guangzhou, China. *BMC Public Health* 2015;15:982.
10. Fichtenberg CM, Glantz SA. Effect of smoke-free workplace on smoking behaviour: systematic review. *BMJ* 2002;325:188.
11. Frazer K, Callinan JE, McHugh J, *et al*. Legislative smoking bans for reducing harms from secondhand smoke exposure, smoking prevalence and tobacco consumption. *Cochrane database Syst Rev* 2016;2:CD005992.
12. Ley de medidas sanitarias frente al tabaquismo y reguladora de la venta, el suministro y la publicidad de los productos del tabaco. L. N. 28/2005 (27 diciembre 2005). Available at: <https://www.boe.es/buscar/doc.php?id=BOE-A-2005-21261> . Accessed 6-3-2017.
13. Nebot M, Fernández E, (Coords) Evaluación del impacto de la ley de medidas sanitarias frente al tabaquismo. Grupo de Trabajo en Tabaquismo de la Sociedad Española de Epidemiología. Barcelona: Sociedad Española de Epidemiología y Ministerio de Sanidad y Política Social, 9-43. 2009. Available in: URL: <http://www.seepidemiologia.es/documents/dummy/Monografia-Grupo%20Trabajo%20sobre%20tabaquismo.pdf>
14. Cordoba R, Villalbi JR, Salvador-Llivina T, *et al*. El proceso en España de la adopción de una legislación eficaz para la prevención del tabaquismo [Spain's process of passing effective smoking prevention legislation]. *Rev Esp Salud Publica* 2006;80:631–45.
15. Nebot M, López MJ, Ariza C, Pérez-Ríos M, *et al*. Impact of the Spanish smoking law on exposure to secondhand smoke in offices and hospitality venues: Before-and-after study. *Environ Health Perspect* 2009;117:344–7.
16. Ley de medidas sanitarias frente al tabaquismo y reguladora de la venta, el suministro y la publicidad de los productos del tabaco (30 December 2010), por la que se modifica la Ley 28/2005, de 26 de diciembre, de medidas sanitarias frente al tabaquismo y reguladora de la venta, el suministro, el consumo y la publicidad de los productos del tabaco. Boletín Oficial del Estado (Spanish Official State Bulletin). L. N. 42/2010.No. 318. Available at: <https://www.boe.es/buscar/act.php?id=BOE-A-2010-20138> . Accessed 6-3-2017.
17. Regidor E, de Mateo S, Ronda E, *et al*. Heterogeneous trend in smoking prevalence by sex and age group following the implementation of a national smoke-free law. *J Epidemiol Community Health* 2011;65:702–8.
18. Regidor E, Pascual C, Giráldez-García C, *et al*. Impact of tobacco prices and smoke-free policy on smoking cessation, by gender and educational group: Spain, 1993–2012. *Int J Drug Policy* 2015;26:1215–21.
19. Perez-Rios M, Fernandez E, Schiaffino A, *et al*. Changes in the prevalence of tobacco consumption and the profile of Spanish smokers after a comprehensive smoke-free policy. *PLoS One* 2015;10:1–9.
20. Jiménez Ruiz CA, Riesco Miranda JA, Altet Gómez N, *et al*. Impact of legislation on passive smoking in Spain. *Respiration* 2014;87:190–5.
21. Catalina Romero C, Gelpi Médez JA, Cortés Arcas MV, *et al*. Evolución en España del consumo de tabaco en población trabajadora desde la entrada en vigor de la Ley 28/2005 de medidas sanitarias frente al tabaquismo [Prevalence of Tobacco Consumption Among Working Population after the Law 42/2010, Spain]. *Rev Esp salud pública* 2010;84:223–7.
22. Catalina Romero C, Sainz Gutiérrez JC, Quevedo Aguado L, *et al*. Prevalencia de consumo de tabaco en población trabajadora tras la entrada en vigor de la Ley 42/2010 [Prevalence of tobacco consumption among working

- population after the law 42/2010, Spain]. *Rev Esp Salud Publica* 2012;86:177–88.
23. Pérez-Ríos M, Galán I(editors) Evaluación de las políticas de control del tabaquismo en España (Leyes 28/2005 y 42/2010) Revisión de la evidencia. Grupo de Trabajo en Tabaquismo de la Sociedad Española de Epidemiología. Barcelona: Sociedad Española de Epidemiología y Ministerio de Sanidad y Política Social, 2017;11-74. Available in: URL: <http://www.seepidemiologia.es/documents/dummy/V9.0%2520-%2520Libro%2520Tabaquismo%25202017%2520-%2520Abierto%2520Final.pdf>
  24. Lidón-moyano C, Fu M, Ballbè M, *et al.* Addictive Behaviors Impact of the Spanish smoking laws on tobacco consumption and secondhand smoke exposure : A longitudinal population study. *Addict Behav* 2017;75:30–5.
  25. Bauzá-Amengual M, Blasco-González M, Sánchez-Vazquez E, *et al.* Impacto de la Ley del tabaco en el lugar de trabajo: estudio de seguimiento de una cohorte de trabajadores en España 2005–07 [Impact of the Tobacco Law on the workplace: a follow up study of a cohort of workers in Spain 2005–2007]. *Atención primaria* 2010;42:309–13.
  26. Bolívar B, Pareja C, Astier-Peña MP, *et al.* Variability in the performance of preventive services and in the degree of control of identified health problems: a primary care study protocol. *BMC Public Health* 2008;8:281.
  27. The International Statistical Classification of Diseases and Related Health Problems (ICD-10th revision) classification of mental and behavioural disorders: clinical descriptions and diagnostic guidelines. Geneva: World Health Organization, 1992. Available at: <http://www.who.int/classifications/icd/en/bluebook.pdf> . Accessed 6-3-2017..
  28. Okkes IM, Becker HW, Bernstein RM, *et al.*The March 2002 update of the electronic version of ICPC-2. A step forward to the use of ICD-10 as a nomenclature and a terminology for ICPC-2. *Fam Pract* 2002;19:543–6.
  29. Kim H-J, Fay MP, Feuer EJ, *et al.* Permutation tests for joinpoint regression with applications to cancer rates. *Stat Med* 2000;19:335–51. Available at: [http://onlinelibrary.wiley.com/doi/10.1002/\(SICI\)1097-0258\(20000215\)19:3%253C335::AID-SIM336%253E3.0.CO;2-Z/abstract](http://onlinelibrary.wiley.com/doi/10.1002/(SICI)1097-0258(20000215)19:3%253C335::AID-SIM336%253E3.0.CO;2-Z/abstract). Accessed 8-3-2017.
  30. Martín-Sánchez JC, Martínez-Sánchez JM, Bilal U, *et al.* Sex and Age Specific Projections of Smoking Prevalence in Spain: A Bayesian Approach. *Nicotine Tob Res* 2017; ntx120, <https://doi.org/10.1093/ntr/ntx120>.
  31. Ministerio de Sanidad Servicios Sociales e Igualdad. Encuesta Europea de Salud en España: Determinantes de salud [Internet]. 2014. Available from: <http://www.msssi.gob.es/estadEstudios/estadisticas/EncuestaEuropea/pdf/MODULO3RELATIVOweb.pdf>
  32. Ramos R, Balló E, Marrugat J, *et al.* Validity for Use in Research on Vascular Diseases of the SIDIAP (Information System for the Development of Research in Primary Care): the EMMA Study. *Rev Española Cardiol (English Ed [Internet]*. 2012;65:29–37. Available from: <http://www.revespcardiol.org/en/validity-for-use-in-research/articulo/90072112/> Accessed 25-5-2018.
  33. Wilson LM, Avila Tang E, Chander G, *et al.* Impact of tobacco control interventions on smoking initiation, cessation, and prevalence: A systematic review. *J Environ Public Health* 2012; doi:10.1155/2012/961724
  34. Guerrero F, Santonja F-J, Villanueva R-J. Analysing the Spanish smoke-free legislation of 2006: a new method to quantify its impact using a dynamic model. *Int J Drug Policy* 2011 Jul;22:247–51.
  35. Pinilla J, Abásolo I. The effect of policies regulating tobacco consumption on smoking initiation and cessation in Spain: is it equal across socioeconomic groups? *Tob Induc Dis* 2017;15:8.
  36. Longo DR, Johnson JC, Kruse RL, *et al.* A prospective investigation of the impact of smoking bans on tobacco cessation and relapse. *Tob Control* 2001;10:267–72.
  37. Shang C. The effect of smoke-free air law in bars on smoking initiation and relapse among teenagers and young adults. *Int J Environ Res Public Health* 2015;12:504–20.
  38. Buczkowski K, Marcinowicz L, Czachowski S, *et al.* Motivations toward smoking cessation, reasons for relapse, and modes of quitting: results from a qualitative study among former and current smokers. *Patient Prefer Adherence* 2014;8:1353–63.
  39. Schillo BA, Keller PA, Betzner AE, *et al.* Minnesota’s smokefree policies: Impact on cessation program participants. *Am J Prev Med* 2012;43:S171–8.
  40. Ley foral 6/2003, de 14 de febrero, de prevención del consumo de tabaco, de protección del aire respirable y de la promoción de la salud en relación al tabaco (Navarra). Available at: <http://www.lexnavarra.navarra.es/detalle.asp?r=3323>. Accessed 31-7-2017
  41. Gili M, Garcia Campayo J, Roca M. Crisis económica y salud mental. Informe SESPAS 2014 [Economic crisis and mental health. SESPAS report 2014]. *Gac Sanit* 2014;28 Suppl 1:104–8.
  42. World Health Organization. WHO report on the global tobacco epidemic, 2009: implementing smoke-free environments. Geneva: World Health Organization; 2009.
  43. Buonanno P, Ranzani M. Thank you for not smoking: Evidence from the Italian smoking ban. *Health Policy*

- 1  
2  
3 2013;109:192–9.
- 4 44. Camarelles Guillem F, Dalmau González-Gallarza R, Clemente Jiménez L, *et al*. Documento de consenso para la  
5 atención clínica al tabaquismo en España [Consensus report for the clinical care of smoking cessation in Spain]. *Med*  
6 *Clin* 2013;140:272.e1-272.e12.
- 7 45. Lopez-Campos JL, Ruiz-Ramos M, Fernandez E, *et al*. Recent lung cancer mortality trends in Europe: effect of  
8 national smoke-free legislation strengthening. *Eur J Cancer Prev*. 2017 Apr 4. doi: 10.1097/CEJ.0000000000000354.
- 9 46. Jan C, Lee M, Roa R, *et al*. The association of tobacco control policies and the risk of acute myocardial infarction  
10 using hospital admissions data. *PLoS One*. 2014;9(2). doi: 10.1371/journal.pone.0088784
- 11 47. Rando-Matos Y, Pons-Vigués M, Rodríguez-Blanco T, *et al*. Effect of comprehensive smoke-free legislation on  
12 asthma and coronary disease trends in Spanish primary care patients. *Eur J Public Health* [Internet]. 2018;cky010.  
13 doi: 10.1093/eurpub/cky010.
- 14 48. Córdoba R, Cabezas C, Camarelles F, *et al*. Recomendaciones sobre el estilo de vida. *Atención primaria* 2012;44:16–  
15 22.  
16  
17  
18  
19  
20  
21  
22  
23  
24  
25  
26  
27  
28  
29  
30  
31  
32  
33  
34  
35  
36  
37  
38  
39  
40  
41  
42  
43  
44  
45  
46  
47  
48  
49  
50  
51  
52  
53  
54  
55  
56  
57  
58  
59  
60

Figure 1: Flow-chart of patients included in the study, by region.



Patients belonged to 22 Primary Health Care Teams in each region  
<sup>a</sup> atypical patient-list <400 or >3000; GP with shorter patient lists were accepted if it was their first year in the Primary Health Care Team  
<sup>b</sup> In Catalonia or Navarre  
<sup>c</sup> In the Balearic Islands  
 PHC: Primary health care

Figure 1: Flow-chart of patients included in the study, by region.

209x297mm (300 x 300 DPI)

**SUPPLEMENTARY DATA FOR Effect of the comprehensive smoke-free law on time trends in smoking behaviour in Primary Health Care patients in Spain: a longitudinal observational study**

**Table S1: Information concerning smoking status in the electronic health records by region**

| Information from electronic health records                                            | Catalonia                                                                                         | Navarre                    | Balearic Islands       |
|---------------------------------------------------------------------------------------|---------------------------------------------------------------------------------------------------|----------------------------|------------------------|
| <b>Diagnostic codes related to smoking (with entry date)</b>                          | Smoker: F17, F17.0, F17.1, F17.2, F17.5, F17.6, F17.7, F17.8, F17.9 in ICD-10<br>Ex-smoker: Z72.0 | Smoker: code P17 in ICPC-2 | Smoker: 305.1 in ICD-9 |
| <b>Clinical variables related to smoking in the medical history (with entry date)</b> | Smoking habit:<br>0: non-smoker.<br>1: smoker.<br>2: ex-smoker                                    |                            |                        |
|                                                                                       | Number of cigarettes per day:<br>0 to 300                                                         |                            |                        |
|                                                                                       | Smoking cessation advice:<br>1: yes<br>0: no                                                      |                            |                        |

Abbreviations: ICPC-2, International Classification of Primary Care, second edition; ICD-9 and 10, International Classification of Diseases, 9th and 10th revision.

**Table S2: Age-adjusted rates by direct method per 10,000 inhabitants based on the European Standard Population. CATALONIA N=141,071 (2008-2013).**

| Quarter | Smoking status prevalence |         |            | New smokers incidence | New ex-smokers incidence | Ex-smoker relapses incidence |
|---------|---------------------------|---------|------------|-----------------------|--------------------------|------------------------------|
|         | Non smokers               | Smokers | Ex-smokers |                       |                          |                              |
| 2008.1  | 4692.6                    | 4138.9  | 1168.5     | 20.8                  | 254.3                    | 226.9                        |
| 2008.2  | 4679.3                    | 4099.0  | 1221.7     | 21.4                  | 212.9                    | 151.4                        |
| 2008.3  | 4668.8                    | 4073.6  | 1257.6     | 16.6                  | 267.5                    | 218.5                        |
| 2008.4  | 4650.2                    | 4051.7  | 1298.1     | 26.1                  | 317.6                    | 100.4                        |
| 2009.1  | 4638.8                    | 4053.6  | 1307.6     | 25.2                  | 260.1                    | 128.6                        |
| 2009.2  | 4628.1                    | 4036.8  | 1335.1     | 15.8                  | 228.5                    | 78.3                         |
| 2009.3  | 4618.4                    | 4021.6  | 1360.0     | 12.7                  | 161.3                    | 113.7                        |
| 2009.4  | 4604.4                    | 3998.5  | 1397.2     | 19.6                  | 212.7                    | 165.6                        |
| 2010.1  | 4590.0                    | 4001.8  | 1408.2     | 19.0                  | 160.9                    | 123.1                        |
| 2010.2  | 4573.5                    | 3994.3  | 1432.2     | 26.4                  | 135.8                    | 148.8                        |
| 2010.3  | 4560.0                    | 3981.0  | 1459.0     | 20.8                  | 139.0                    | 100.5                        |
| 2010.4  | 4539.7                    | 3957.4  | 1503.0     | 26.8                  | 188.1                    | 112.5                        |
| 2011.1  | 4077.0                    | 3758.0  | 1510.3     | 15.1                  | 171.9                    | 103.2                        |
| 2011.2  | 4068.6                    | 3721.4  | 1555.3     | 12.4                  | 213.0                    | 90.0                         |
| 2011.3  | 4061.6                    | 3696.3  | 1587.3     | 13.0                  | 145.9                    | 81.4                         |
| 2011.4  | 4050.8                    | 3649.8  | 1644.7     | 15.8                  | 255.4                    | 91.3                         |
| 2012.1  | 4012.6                    | 3658.7  | 1673.9     | 13.4                  | 222.7                    | 111.1                        |
| 2012.2  | 4004.9                    | 3629.6  | 1710.7     | 11.3                  | 171.3                    | 91.9                         |
| 2012.3  | 4000.4                    | 3608.5  | 1736.3     | 7.9                   | 118.8                    | 70.7                         |
| 2012.4  | 3990.2                    | 3579.2  | 1775.8     | 11.8                  | 201.3                    | 103.9                        |
| 2013.1  | 3963.0                    | 3601.1  | 1781.2     | 16.5                  | 184.9                    | 141.7                        |
| 2013.2  | 3956.3                    | 3618.6  | 1770.3     | 15.2                  | 136.7                    | 247.6                        |
| 2013.3  | 3952.8                    | 3635.1  | 1757.3     | 9.3                   | 110.7                    | 248.6                        |
| 2013.4  | 3946.5                    | 3659.3  | 1739.5     | 14.7                  | 172.8                    | 334.5                        |

Note: 2008.\*. represents the quarter \* of the year 2008

Rates are per 10,000 inhabitants and age-standardized on the European Standard Population (direct method)

**Table S3: Age-adjusted rates by the direct method per 10,000 inhabitants based on the European Standard Population. NAVARRE N=73,644 (2008-2013).**

| Quarter | Smoking status prevalence |         |            | New smokers incidence | New ex-smokers incidence | Ex-smoker relapses incidence |
|---------|---------------------------|---------|------------|-----------------------|--------------------------|------------------------------|
|         | Non smokers               | Smokers | Ex-smokers |                       |                          |                              |
| 2008.1  | 5652.5                    | 4034.2  | 313.3      | 25.3                  | 175.3                    | 227.0                        |
| 2008.2  | 5642.5                    | 4013.0  | 344.5      | 17.2                  | 181.0                    | 160.4                        |
| 2008.3  | 5632.4                    | 4003.3  | 364.3      | 16.5                  | 109.1                    | 129.4                        |
| 2008.4  | 5620.0                    | 3993.3  | 386.7      | 21.4                  | 127.7                    | 230.3                        |
| 2009.1  | 5645.0                    | 3951.4  | 403.7      | 30.9                  | 136.4                    | 225.4                        |
| 2009.2  | 5630.8                    | 3944.1  | 425.1      | 23.5                  | 132.1                    | 174.0                        |
| 2009.3  | 5623.5                    | 3934.7  | 441.8      | 12.5                  | 100.3                    | 100.7                        |
| 2009.4  | 5614.7                    | 3925.5  | 459.8      | 14.8                  | 109.9                    | 134.7                        |
| 2010.1  | 5618.3                    | 3905.9  | 475.8      | 27.2                  | 111.2                    | 209.4                        |
| 2010.2  | 5605.5                    | 3893.8  | 500.7      | 21.1                  | 114.9                    | 132.5                        |
| 2010.3  | 5595.1                    | 3889.1  | 515.8      | 16.4                  | 82.2                     | 98.7                         |
| 2010.4  | 5581.9                    | 3885.3  | 532.8      | 21.4                  | 89.9                     | 81.2                         |
| 2011.1  | 4990.3                    | 3806.9  | 548.1      | 16.0                  | 136.8                    | 141.3                        |
| 2011.2  | 4979.2                    | 3795.8  | 570.2      | 20.3                  | 116.7                    | 113.8                        |
| 2011.3  | 4972.0                    | 3791.6  | 581.6      | 12.7                  | 48.6                     | 60.2                         |
| 2011.4  | 4964.3                    | 3780.5  | 600.4      | 13.8                  | 99.6                     | 118.6                        |
| 2012.1  | 4910.7                    | 3804.6  | 630.0      | 18.6                  | 127.3                    | 87.6                         |
| 2012.2  | 4902.9                    | 3781.3  | 661.1      | 13.7                  | 130.1                    | 108.4                        |
| 2012.3  | 4897.7                    | 3773.3  | 674.3      | 9.8                   | 75.2                     | 58.6                         |
| 2012.4  | 4888.9                    | 3760.5  | 695.8      | 15.2                  | 110.2                    | 96.0                         |
| 2013.1  | 4886.8                    | 3746.7  | 711.8      | 15.1                  | 121.0                    | 116.4                        |
| 2013.2  | 4876.8                    | 3733.2  | 735.2      | 16.9                  | 104.2                    | 97.4                         |
| 2013.3  | 4870.8                    | 3727.9  | 746.6      | 9.5                   | 60.7                     | 119.1                        |
| 2013.4  | 4861.3                    | 3719.8  | 764.1      | 16.9                  | 90.7                     | 97.8                         |

Note: 2008.\*. represents the quarter \* of the year 2008

Rates are per 10,000 inhabitants and age-standardized on the European Standard Population (direct method)



**Table S4: Age-adjusted rates by the direct method per 10,000 inhabitants based on the European Standard Population. THE BALEARIC ISLANDS N=178,251 (2010-2013).**

| Quarter | Smoking status prevalence |         |            | New smokers incidence | New ex-smokers incidence | Ex-smoker relapses incidence |
|---------|---------------------------|---------|------------|-----------------------|--------------------------|------------------------------|
|         | Non smokers               | Smokers | Ex-smokers |                       |                          |                              |
| 2010.2  | 5411.0                    | 4029.7  | 559.3      | 9.3                   | 158.5                    | 576.6                        |
| 2010.3  | 5406.4                    | 4007.3  | 586.2      | 9.0                   | 151.6                    | 527.0                        |
| 2010.4  | 5401.6                    | 3982.7  | 615.7      | 9.3                   | 158.7                    | 503.7                        |
| 2011.1  | 5374.9                    | 3987.9  | 637.1      | 6.6                   | 149.9                    | 545.7                        |
| 2011.2  | 5372.4                    | 3959.3  | 668.3      | 5.2                   | 170.9                    | 424.4                        |
| 2011.3  | 5369.7                    | 3929.5  | 700.8      | 5.2                   | 160.1                    | 383.9                        |
| 2011.4  | 5367.4                    | 3898.4  | 734.2      | 4.0                   | 169.8                    | 385.6                        |
| 2012.1  | 5345.3                    | 3888.3  | 766.4      | 4.3                   | 188.1                    | 351.8                        |
| 2012.2  | 5344.0                    | 3862.4  | 793.6      | 2.4                   | 137.0                    | 370.6                        |
| 2012.3  | 5342.5                    | 3841.0  | 816.6      | 2.9                   | 113.5                    | 372.6                        |
| 2012.4  | 5341.7                    | 3818.9  | 839.4      | 1.6                   | 133.0                    | 339.2                        |
| 2013.1  | 5324.1                    | 3825.3  | 850.7      | 2.1                   | 130.5                    | 480.5                        |
| 2013.2  | 5317.8                    | 3810.5  | 871.7      | 12.1                  | 106.7                    | 453.0                        |
| 2013.3  | 5308.3                    | 3800.6  | 891.1      | 17.5                  | 93.7                     | 103.9                        |
| 2013.4  | 5298.6                    | 3787.4  | 914.1      | 17.5                  | 116.8                    | 285.1                        |

Note: 2010.\*. represents the quarter \* of the year 2010

Rates are per 10,000 inhabitants and age-standardized on the European Standard Population (direct method)

1  
2  
3  
4  
5  
6  
7  
8  
9  
10  
11  
12  
13  
14  
15  
16  
17  
18  
19  
20  
21  
22  
23  
24  
25  
26  
27  
28  
29  
30  
31  
32  
33  
34  
35  
36  
37  
38  
39  
40  
41  
42  
43  
44  
45  
46

**Table S5. Age-adjusted rates by the direct method for 10,000 inhabitants based on the European Standard Population in CATALONIA. N=72,340 (2008-2013).**

| Quarter | Smoking Status prevalence |        |         |        |            |        | New smokers incidence | New ex-smokers incidence | Ex-smoker relapse incidence |       |       |       |
|---------|---------------------------|--------|---------|--------|------------|--------|-----------------------|--------------------------|-----------------------------|-------|-------|-------|
|         | Non smokers               |        | Smokers |        | Ex-smokers |        |                       |                          |                             |       |       |       |
|         | Female                    | Male   | Female  | Male   | Female     | Male   |                       |                          |                             |       |       |       |
| 2008.1  | 5909.5                    | 3349.2 | 3411.5  | 4910.7 | 679.0      | 1740.1 | 16.6                  | 27.8                     | 246.7                       | 260.5 | 315.2 | 158.2 |
| 2008.2  | 5900.4                    | 3331.6 | 3385.4  | 4856.2 | 714.2      | 1812.2 | 14.3                  | 34.4                     | 266.5                       | 202.9 | 101.2 | 195.0 |
| 2008.3  | 5891.9                    | 3318.8 | 3368.4  | 4822.1 | 739.7      | 1859.1 | 14.0                  | 21.8                     | 275.0                       | 265.9 | 289.0 | 166.5 |
| 2008.4  | 5876.9                    | 3296.1 | 3356.2  | 4789.4 | 766.9      | 1914.5 | 24.0                  | 31.9                     | 254.1                       | 329.2 | 112.0 | 99.6  |
| 2009.1  | 5832.7                    | 3323.5 | 3379.8  | 4769.9 | 787.5      | 1906.6 | 27.8                  | 26.3                     | 289.2                       | 234.0 | 148.8 | 105.2 |
| 2009.2  | 5823.1                    | 3311.7 | 3366.5  | 4749.0 | 810.4      | 1939.3 | 13.7                  | 19.7                     | 182.0                       | 237.8 | 89.5  | 79.2  |
| 2009.3  | 5814.6                    | 3300.6 | 3356.2  | 4728.4 | 829.2      | 1971.1 | 11.9                  | 15.3                     | 154.4                       | 165.7 | 181.4 | 65.8  |
| 2009.4  | 5804.4                    | 3282.4 | 3335.4  | 4702.6 | 860.2      | 2015.0 | 14.3                  | 28.0                     | 243.3                       | 203.9 | 188.5 | 152.0 |
| 2010.1  | 5757.2                    | 3312.5 | 3359.5  | 4679.7 | 883.3      | 2007.8 | 14.0                  | 26.7                     | 201.5                       | 144.1 | 133.5 | 109.4 |
| 2010.2  | 5744.1                    | 3292.3 | 3355.5  | 4668.2 | 900.4      | 2039.6 | 24.1                  | 30.4                     | 146.6                       | 131.6 | 164.1 | 152.0 |
| 2010.3  | 5730.0                    | 3279.4 | 3345.8  | 4650.5 | 924.2      | 2070.2 | 20.7                  | 22.7                     | 156.1                       | 134.4 | 106.6 | 98.0  |
| 2010.4  | 5710.9                    | 3256.8 | 3332.3  | 4616.4 | 956.8      | 2126.8 | 30.9                  | 24.3                     | 205.4                       | 177.3 | 132.2 | 114.9 |
| 2011.1  | 5231.2                    | 2821.0 | 3138.8  | 4408.8 | 975.2      | 2115.4 | 15.0                  | 16.8                     | 181.1                       | 166.1 | 62.6  | 146.7 |
| 2011.2  | 5223.4                    | 2811.7 | 3115.8  | 4356.5 | 1006.0     | 2177.1 | 12.2                  | 14.3                     | 231.6                       | 203.8 | 118.9 | 65.4  |
| 2011.3  | 5216.7                    | 2804.3 | 3095.4  | 4326.8 | 1033.2     | 2214.1 | 12.4                  | 15.2                     | 166.4                       | 136.0 | 93.0  | 68.5  |
| 2011.4  | 5209.6                    | 2789.1 | 3057.6  | 4270.9 | 1078.0     | 2285.2 | 12.1                  | 21.2                     | 308.9                       | 241.6 | 111.0 | 78.8  |
| 2012.1  | 5142.2                    | 2792.0 | 3082.8  | 4259.8 | 1120.2     | 2293.5 | 9.3                   | 19.1                     | 251.1                       | 216.5 | 140.4 | 83.6  |
| 2012.2  | 5136.1                    | 2782.4 | 3059.1  | 4225.1 | 1150.0     | 2337.7 | 10.4                  | 12.4                     | 215.6                       | 162.3 | 107.4 | 75.8  |
| 2012.3  | 5132.0                    | 2777.7 | 3041.8  | 4200.0 | 1171.4     | 2367.6 | 8.7                   | 7.3                      | 135.6                       | 113.1 | 61.0  | 80.2  |
| 2012.4  | 5123.4                    | 2765.4 | 3020.5  | 4161.9 | 1201.3     | 2417.9 | 10.2                  | 16.2                     | 192.8                       | 203.5 | 128.5 | 89.1  |
| 2013.1  | 5063.9                    | 2781.5 | 3055.9  | 4167.2 | 1225.4     | 2396.5 | 15.4                  | 19.9                     | 213.2                       | 180.4 | 167.8 | 123.5 |
| 2013.2  | 5058.8                    | 2773.4 | 3057.2  | 4202.9 | 1229.3     | 2368.9 | 10.2                  | 21.9                     | 146.9                       | 131.3 | 216.4 | 251.9 |
| 2013.3  | 5055.0                    | 2770.2 | 3060.2  | 4234.1 | 1230.0     | 2340.9 | 9.0                   | 10.7                     | 127.0                       | 106.7 | 217.7 | 263.3 |
| 2013.4  | 5049.2                    | 2763.3 | 3063.6  | 4281.9 | 1232.5     | 2300.1 | 11.8                  | 21.1                     | 202.8                       | 159.2 | 325.6 | 315.6 |

Note: 2008.\*. represents the quarter \* of the year 2008

Rates are per 10,000 inhabitants and age-standardized on the European Standard Population (direct method)

**Table S6. Age-adjusted rates by the direct method per 10,000 inhabitants based on the European Standard Population in NAVARRE. N=37,898 (2008-2013).**

| Quarter | Smoking Status prevalence |        |         |        |            |       | New smokers incidence | New ex-smokers incidence | Ex-smoker relapse incidence |        |       |       |
|---------|---------------------------|--------|---------|--------|------------|-------|-----------------------|--------------------------|-----------------------------|--------|-------|-------|
|         | Non smokers               |        | Smokers |        | Ex-smokers |       |                       |                          |                             | Female | Male  |       |
|         | Female                    | Male   | Female  | Male   | Female     | Male  |                       |                          |                             | Female | Male  |       |
| 2008.1  | 6224.8                    | 5021.1 | 3542.5  | 4569.6 | 232.7      | 409.3 | 22.3                  | 31.0                     | 152.7                       | 172.3  | 164.4 | 295.8 |
| 2008.2  | 6215.3                    | 5010.6 | 3527.8  | 4539.7 | 256.9      | 449.7 | 15.2                  | 20.3                     | 168.7                       | 187.7  | 136.9 | 173.7 |
| 2008.3  | 6207.4                    | 4998.8 | 3518.5  | 4528.6 | 274.2      | 472.6 | 11.5                  | 22.1                     | 147.1                       | 97.1   | 147.9 | 123.7 |
| 2008.4  | 6198.6                    | 4982.4 | 3510.9  | 4515.4 | 290.4      | 502.2 | 14.8                  | 30.0                     | 157.9                       | 125.6  | 296.5 | 98.8  |
| 2009.1  | 6209.7                    | 5028.3 | 3485.7  | 4451.5 | 304.6      | 520.2 | 24.9                  | 39.7                     | 184.8                       | 111.3  | 254.0 | 197.0 |
| 2009.2  | 6197.8                    | 5011.6 | 3480.3  | 4441.1 | 321.9      | 547.3 | 17.4                  | 32.6                     | 177.2                       | 127.7  | 152.7 | 171.7 |
| 2009.3  | 6191.6                    | 5003.2 | 3475.5  | 4426.3 | 332.9      | 570.4 | 10.7                  | 15.2                     | 108.4                       | 98.3   | 73.4  | 111.5 |
| 2009.4  | 6186.2                    | 4990.0 | 3470.2  | 4413.1 | 343.6      | 596.9 | 8.4                   | 24.0                     | 97.2                        | 115.8  | 126.6 | 134.7 |
| 2010.1  | 6175.4                    | 5014.1 | 3464.6  | 4375.5 | 360.0      | 610.4 | 22.6                  | 33.5                     | 115.7                       | 112.9  | 224.3 | 208.6 |
| 2010.2  | 6164.6                    | 4999.4 | 3455.7  | 4359.8 | 379.7      | 640.8 | 16.4                  | 27.9                     | 119.1                       | 114.5  | 106.4 | 129.5 |
| 2010.3  | 6154.5                    | 4988.6 | 3456.0  | 4350.4 | 389.5      | 661.0 | 16.2                  | 17.0                     | 111.3                       | 75.9   | 88.3  | 94.5  |
| 2010.4  | 6142.1                    | 4974.6 | 3455.4  | 4343.4 | 402.5      | 682.1 | 17.8                  | 26.3                     | 126.9                       | 80.9   | 71.3  | 85.7  |
| 2011.1  | 5541.4                    | 4399.8 | 3388.4  | 4248.3 | 415.4      | 697.1 | 12.2                  | 21.0                     | 146.2                       | 135.4  | 91.3  | 183.2 |
| 2011.2  | 5532.4                    | 4386.6 | 3381.0  | 4233.7 | 431.9      | 724.9 | 15.5                  | 26.8                     | 151.1                       | 110.6  | 117.2 | 103.9 |
| 2011.3  | 5524.7                    | 4379.8 | 3377.8  | 4228.5 | 442.7      | 737.0 | 12.6                  | 13.7                     | 55.8                        | 44.9   | 61.6  | 54.1  |
| 2011.4  | 5518.9                    | 4370.0 | 3369.7  | 4213.6 | 456.6      | 761.7 | 9.6                   | 19.5                     | 118.2                       | 95.4   | 70.0  | 160.8 |
| 2012.1  | 5452.1                    | 4335.6 | 3408.9  | 4217.7 | 484.2      | 792.0 | 15.9                  | 22.5                     | 129.3                       | 126.5  | 106.9 | 65.3  |
| 2012.2  | 5445.6                    | 4326.1 | 3389.4  | 4190.1 | 510.2      | 829.0 | 11.7                  | 17.2                     | 125.1                       | 131.6  | 95.3  | 114.5 |
| 2012.3  | 5442.6                    | 4318.6 | 3385.2  | 4178.7 | 517.4      | 847.9 | 6.2                   | 14.2                     | 67.6                        | 78.0   | 68.6  | 41.2  |
| 2012.4  | 5434.5                    | 4308.9 | 3379.5  | 4159.1 | 531.2      | 877.2 | 12.5                  | 19.6                     | 130.7                       | 110.0  | 66.7  | 126.7 |
| 2013.1  | 5420.0                    | 4323.0 | 3380.9  | 4128.0 | 544.3      | 894.1 | 14.1                  | 16.4                     | 133.8                       | 124.7  | 68.6  | 157.5 |
| 2013.2  | 5413.7                    | 4309.1 | 3367.7  | 4114.5 | 563.9      | 921.6 | 10.1                  | 25.2                     | 103.2                       | 104.7  | 87.0  | 98.4  |
| 2013.3  | 5408.6                    | 4302.1 | 3363.6  | 4108.1 | 573.1      | 935.1 | 7.2                   | 12.7                     | 72.3                        | 57.3   | 152.7 | 85.9  |
| 2013.4  | 5399.9                    | 4291.6 | 3360.4  | 4094.8 | 584.9      | 958.8 | 13.9                  | 21.7                     | 65.6                        | 102.8  | 72.2  | 116.0 |

Note: 2008.\*. represents the quarter \* of the year 2008

Rates are per 10,000 inhabitants and age-standardized on the European Standard Population (direct method)

1  
2  
3  
4  
5  
6  
7  
8  
9  
10  
11  
12  
13  
14  
15  
16  
17  
18  
19  
20  
21  
22  
23  
24  
25  
26  
27  
28  
29  
30  
31  
32  
33  
34  
35  
36  
37  
38  
39  
40  
41  
42  
43  
44  
45  
46

**Table S7. Age-adjusted rates by the direct method per 10,000 inhabitants based on the European Standard Population in THE BALEARIC ISLANDS. N= 94,164 (2010-2013).**

| Quarter | Smoking Status prevalence |        |         |        |            |        | New smokers incidence | New ex-smokers incidence | Ex-smoker relapse incidence |       |       |       |
|---------|---------------------------|--------|---------|--------|------------|--------|-----------------------|--------------------------|-----------------------------|-------|-------|-------|
|         | Non smokers               |        | Smokers |        | Ex-smokers |        |                       |                          |                             |       |       |       |
|         | Female                    | Male   | Female  | Male   | Female     | Male   |                       |                          |                             |       |       |       |
| 2010.2  | 6224.8                    | 4484.3 | 3412.3  | 4723.7 | 362.9      | 792.0  | 8.9                   | 9.9                      | 106.8                       | 169.6 | 631.1 | 560.7 |
| 2010.3  | 6220.5                    | 4479.3 | 3395.5  | 4695.0 | 384.0      | 825.7  | 8.2                   | 10.4                     | 149.6                       | 147.6 | 576.9 | 435.9 |
| 2010.4  | 6215.8                    | 4474.3 | 3376.3  | 4664.4 | 408.0      | 861.2  | 8.8                   | 10.1                     | 179.2                       | 150.7 | 484.7 | 571.5 |
| 2011.1  | 6171.2                    | 4472.1 | 3395.3  | 4651.7 | 433.5      | 876.2  | 6.7                   | 6.6                      | 141.1                       | 146.7 | 562.7 | 508.9 |
| 2011.2  | 6168.5                    | 4469.8 | 3375.7  | 4612.8 | 455.9      | 917.5  | 5.2                   | 5.4                      | 140.3                       | 173.8 | 446.1 | 426.0 |
| 2011.3  | 6165.8                    | 4467.0 | 3353.4  | 4574.6 | 480.8      | 958.4  | 4.9                   | 6.0                      | 162.5                       | 154.9 | 400.9 | 391.6 |
| 2011.4  | 6163.1                    | 4465.3 | 3330.1  | 4534.6 | 506.8      | 1000.1 | 4.6                   | 3.4                      | 149.3                       | 170.9 | 296.7 | 540.3 |
| 2012.1  | 6118.6                    | 4474.0 | 3337.9  | 4501.2 | 543.6      | 1024.8 | 3.7                   | 5.1                      | 179.2                       | 182.1 | 306.5 | 461.7 |
| 2012.2  | 6117.0                    | 4473.2 | 3318.1  | 4468.3 | 564.9      | 1058.5 | 2.8                   | 1.9                      | 109.0                       | 139.6 | 359.8 | 348.6 |
| 2012.3  | 6115.2                    | 4471.9 | 3302.0  | 4440.5 | 582.8      | 1087.7 | 3.1                   | 2.5                      | 103.4                       | 112.8 | 376.5 | 363.9 |
| 2012.4  | 6114.3                    | 4471.2 | 3285.7  | 4411.7 | 600.0      | 1117.0 | 1.7                   | 1.6                      | 122.7                       | 132.9 | 414.0 | 213.4 |
| 2013.1  | 6077.2                    | 4479.2 | 3302.2  | 4406.4 | 620.6      | 1114.4 | 0.9                   | 4.1                      | 137.9                       | 122.6 | 492.0 | 470.3 |
| 2013.2  | 6070.8                    | 4473.1 | 3291.1  | 4387.8 | 638.2      | 1139.1 | 11.9                  | 12.7                     | 91.0                        | 105.4 | 410.8 | 532.6 |
| 2013.3  | 6056.9                    | 4468.7 | 3287.9  | 4370.1 | 655.1      | 1161.2 | 23.4                  | 10.4                     | 94.4                        | 90.1  | 110.4 | 87.5  |
| 2013.4  | 6046.1                    | 4460.3 | 3280.8  | 4349.5 | 673.1      | 1190.2 | 18.2                  | 16.9                     | 100.0                       | 121.4 | 342.4 | 116.1 |

Note: 2010.\*. represents the quarter \* of the year 2010

Rates are per 10,000 inhabitants and age-standardized on the European Standard Population (direct method)

**SUPPLEMENTARY DATA FOR Effect of the comprehensive smoke-free law on time trends in smoking behaviour in Primary Health Care patients in Spain: a longitudinal observational study**

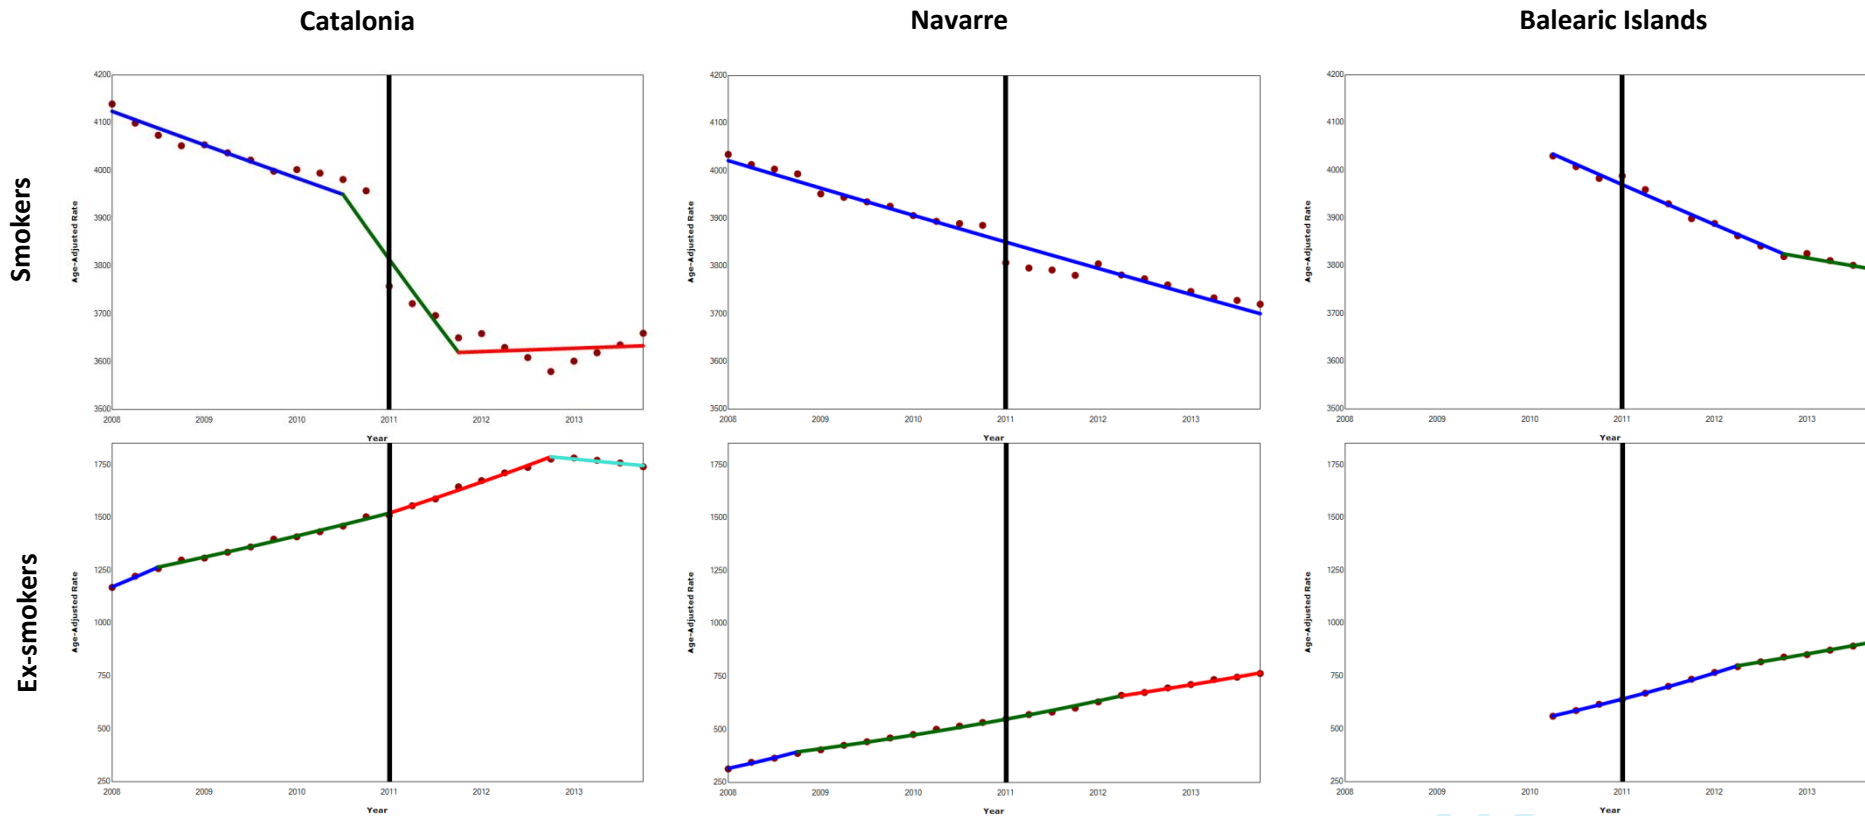

**Figure S1: Overall trends of age-standardized prevalence rates of smoking status in Catalonia, Navarre and the Balearic Islands.**

Solid lines represent the Joinpoint regression lines (each colour is a different trend); circle red points represent the age-adjusted prevalence rates. Black vertical lines represent the year when the Spanish comprehensive smoke-free law was introduced (2011).

Catalonia

Navarre

Balearic Islands

1  
2  
3  
4  
5  
6  
7  
8  
9  
10  
11  
12  
13  
14  
15  
16  
17  
18  
19  
20  
21  
22  
23  
24  
25  
26  
27  
28  
29  
30  
31  
32  
33  
34  
35  
36  
37  
38  
39  
40  
41  
42  
43  
44  
45  
46

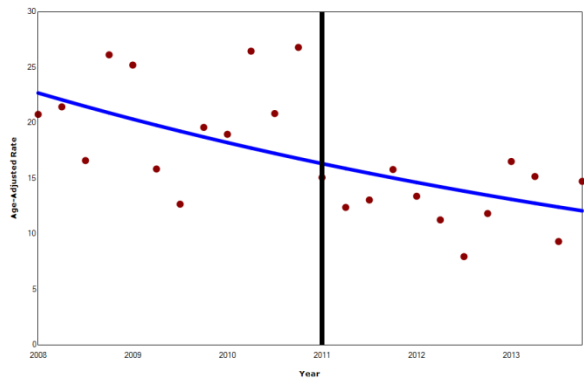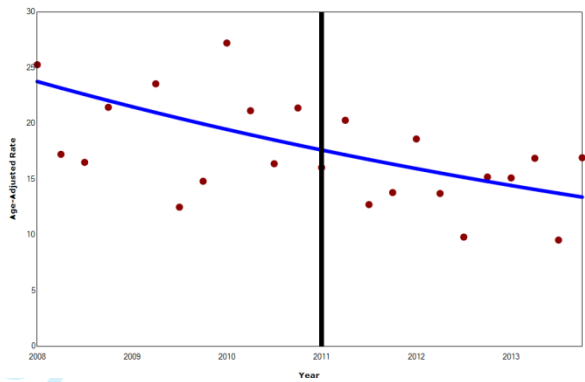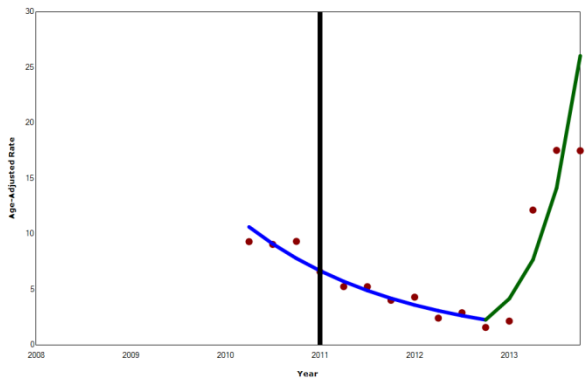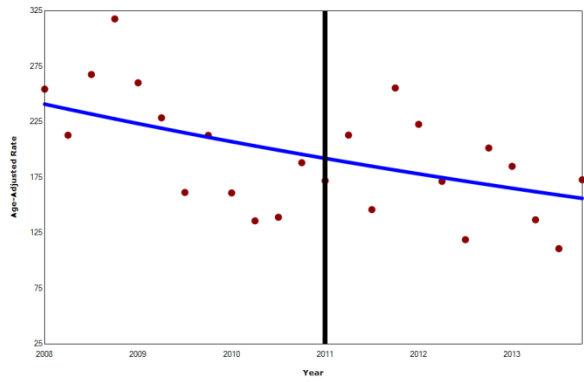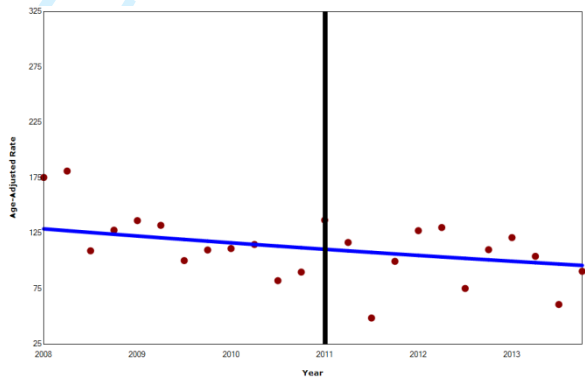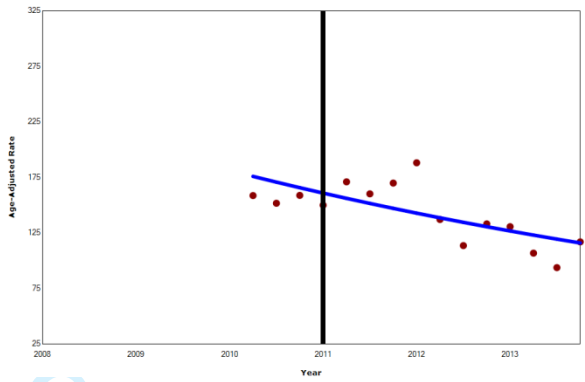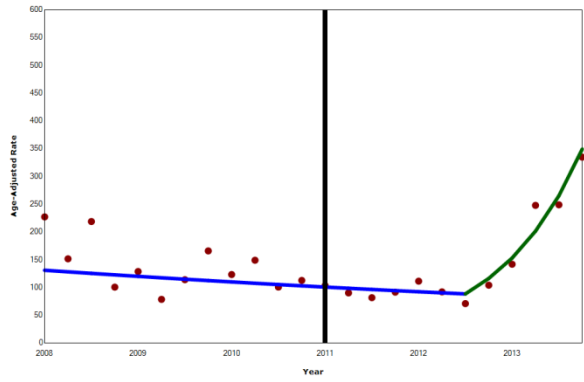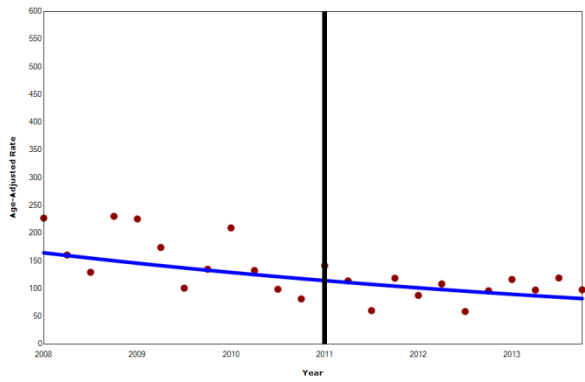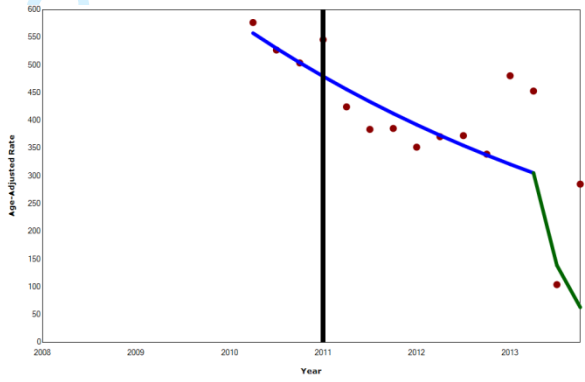

Figure S2: Overall trends of age-standardized incidence rates of new smokers, ex-smokers and ex-smoker relapse in Catalonia, Navarre and the Balearic Islands. Solid lines represent the Joinpoint regression lines (each colour is a different trend); circle red points represent the age-adjusted incidence rates. Black vertical lines represent the year when the Spanish comprehensive smoke-free law was introduced (2011).

**STROBE 2007 (v4) Statement—Checklist of items that should be included in reports of *cross-sectional studies***

| Section/Topic                | Item # | Recommendation                                                                                                                                                                       | Reported on page # |
|------------------------------|--------|--------------------------------------------------------------------------------------------------------------------------------------------------------------------------------------|--------------------|
| Title and abstract           | 1      | (a) Indicate the study's design with a commonly used term in the title or the abstract                                                                                               | 3                  |
|                              |        | (b) Provide in the abstract an informative and balanced summary of what was done and what was found                                                                                  | 3                  |
| <b>Introduction</b>          |        |                                                                                                                                                                                      |                    |
| Background/rationale         | 2      | Explain the scientific background and rationale for the investigation being reported                                                                                                 | 5-6                |
| Objectives                   | 3      | State specific objectives, including any prespecified hypotheses                                                                                                                     | 6                  |
| <b>Methods</b>               |        |                                                                                                                                                                                      |                    |
| Study design                 | 4      | Present key elements of study design early in the paper                                                                                                                              | 6                  |
| Setting                      | 5      | Describe the setting, locations, and relevant dates, including periods of recruitment, exposure, follow-up, and data collection                                                      | 6-7                |
| Participants                 | 6      | (a) Give the eligibility criteria, and the sources and methods of selection of participants                                                                                          | 6-7                |
| Variables                    | 7      | Clearly define all outcomes, exposures, predictors, potential confounders, and effect modifiers. Give diagnostic criteria, if applicable                                             | 7                  |
| Data sources/<br>measurement | 8*     | For each variable of interest, give sources of data and details of methods of assessment (measurement). Describe comparability of assessment methods if there is more than one group | 7                  |
| Bias                         | 9      | Describe any efforts to address potential sources of bias                                                                                                                            | 7                  |
| Study size                   | 10     | Explain how the study size was arrived at                                                                                                                                            | 6 + Figure 1       |
| Quantitative variables       | 11     | Explain how quantitative variables were handled in the analyses. If applicable, describe which groupings were chosen and why                                                         | 7-8                |
| Statistical methods          | 12     | (a) Describe all statistical methods, including those used to control for confounding                                                                                                | 7-8                |
|                              |        | (b) Describe any methods used to examine subgroups and interactions                                                                                                                  | 7-8                |
|                              |        | (c) Explain how missing data were addressed                                                                                                                                          | 6 + 15             |
|                              |        | (d) If applicable, describe analytical methods taking account of sampling strategy                                                                                                   |                    |
|                              |        | (e) Describe any sensitivity analyses                                                                                                                                                |                    |
| <b>Results</b>               |        |                                                                                                                                                                                      |                    |

|                          |     |                                                                                                                                                                                                              |                  |
|--------------------------|-----|--------------------------------------------------------------------------------------------------------------------------------------------------------------------------------------------------------------|------------------|
| Participants             | 13* | (a) Report numbers of individuals at each stage of study—eg numbers potentially eligible, examined for eligibility, confirmed eligible, included in the study, completing follow-up, and analysed            | 6, 8. Figure 1   |
|                          |     | (b) Give reasons for non-participation at each stage                                                                                                                                                         | 6. Figure 1      |
|                          |     | (c) Consider use of a flow diagram                                                                                                                                                                           | 6. Figure 1      |
| Descriptive data         | 14* | (a) Give characteristics of study participants (eg demographic, clinical, social) and information on exposures and potential confounders                                                                     | 8. Table 1.      |
|                          |     | (b) Indicate number of participants with missing data for each variable of interest                                                                                                                          | 8                |
| Outcome data             | 15* | Report numbers of outcome events or summary measures                                                                                                                                                         | 8-12. Tables 2-4 |
| Main results             | 16  | (a) Give unadjusted estimates and, if applicable, confounder-adjusted estimates and their precision (eg, 95% confidence interval). Make clear which confounders were adjusted for and why they were included | 8-12. Tables 2-4 |
|                          |     | (b) Report category boundaries when continuous variables were categorized                                                                                                                                    |                  |
|                          |     | (c) If relevant, consider translating estimates of relative risk into absolute risk for a meaningful time period                                                                                             |                  |
| Other analyses           | 17  | Report other analyses done—eg analyses of subgroups and interactions, and sensitivity analyses                                                                                                               |                  |
| <b>Discussion</b>        |     |                                                                                                                                                                                                              |                  |
| Key results              | 18  | Summarise key results with reference to study objectives                                                                                                                                                     | 13               |
| Limitations              | 19  | Discuss limitations of the study, taking into account sources of potential bias or imprecision. Discuss both direction and magnitude of any potential bias                                                   | 14-15            |
| Interpretation           | 20  | Give a cautious overall interpretation of results considering objectives, limitations, multiplicity of analyses, results from similar studies, and other relevant evidence                                   | 13-15            |
| Generalisability         | 21  | Discuss the generalisability (external validity) of the study results                                                                                                                                        | 15               |
| <b>Other information</b> |     |                                                                                                                                                                                                              |                  |
| Funding                  | 22  | Give the source of funding and the role of the funders for the present study and, if applicable, for the original study on which the present article is based                                                | 15-16            |

\*Give information separately for cases and controls in case-control studies and, if applicable, for exposed and unexposed groups in cohort and cross-sectional studies.

**Note:** An Explanation and Elaboration article discusses each checklist item and gives methodological background and published examples of transparent reporting. The STROBE checklist is best used in conjunction with this article (freely available on the Web sites of PLoS Medicine at <http://www.plosmedicine.org/>, Annals of Internal Medicine at <http://www.annals.org/>, and Epidemiology at <http://www.epidem.com/>). Information on the STROBE Initiative is available at [www.strobe-statement.org](http://www.strobe-statement.org).
