# Supplementary material for: Effect of the comprehensive smoke-free law on time trends in smoking behaviour in primary healthcare patients in Spain: a longitudinal observational study
Source: PubMed Central journal article supplement — BMJ Open. 2019 Mar 3;9(3):e020120. doi: 10.1136/bmjopen-2017-020120 (PMC6443085; doi:10.1136/bmjopen-2017-020120), 2019-03-03
Supplement: bmjopen-2017-020120supp001.pdf [file bmjopen-2017-020120supp001.pdf]

**SUPPLEMENTARY DATA FOR Effect of the comprehensive smoke-free law on time trends in smoking behaviour in Primary Health Care patients in Spain: a longitudinal observational study**

**Table S1: Information concerning smoking status in the electronic health records by region**

| <b>Information from electronic health records</b>                                     | <b>Catalonia</b>                                                                   | <b>Navarre</b>                | <b>Balearic Islands</b>   |
|---------------------------------------------------------------------------------------|------------------------------------------------------------------------------------|-------------------------------|---------------------------|
| <b>Diagnostic codes related to smoking (with entry date)</b>                          | Smoker: F17, F17.0, F17.1<br>F17.2, F17.5, F17.6, F17.7,<br>F17.8, F17.9 in ICD-10 | Smoker: code<br>P17 in ICPC-2 | Smoker: 305.1 in<br>ICD-9 |
|                                                                                       | Ex-smoker: Z72.0                                                                   |                               |                           |
| <b>Clinical variables related to smoking in the medical history (with entry date)</b> | Smoking habit:<br>0: non-smoker.<br>1: smoker.<br>2: ex-smoker                     |                               |                           |
|                                                                                       | Number of cigarettes per day:<br>0 to 300                                          |                               |                           |
|                                                                                       | Smoking cessation advice:<br>1: yes<br>0: no                                       |                               |                           |

Abbreviations: ICPC-2, International Classification of Primary Care, second edition; ICD-9 and 10, International Classification of Diseases, 9th and 10th revision.

**Table S2: Age-adjusted rates by direct method per 10,000 inhabitants based on the European Standard Population. CATALONIA N=141,071 (2008-2013).**

| Quarter | Smoking status prevalence |         |            | New smokers incidence | New ex-smokers incidence | Ex-smoker relapses incidence |
|---------|---------------------------|---------|------------|-----------------------|--------------------------|------------------------------|
|         | Non smokers               | Smokers | Ex-smokers |                       |                          |                              |
| 2008.1  | 4692.6                    | 4138.9  | 1168.5     | 20.8                  | 254.3                    | 226.9                        |
| 2008.2  | 4679.3                    | 4099.0  | 1221.7     | 21.4                  | 212.9                    | 151.4                        |
| 2008.3  | 4668.8                    | 4073.6  | 1257.6     | 16.6                  | 267.5                    | 218.5                        |
| 2008.4  | 4650.2                    | 4051.7  | 1298.1     | 26.1                  | 317.6                    | 100.4                        |
| 2009.1  | 4638.8                    | 4053.6  | 1307.6     | 25.2                  | 260.1                    | 128.6                        |
| 2009.2  | 4628.1                    | 4036.8  | 1335.1     | 15.8                  | 228.5                    | 78.3                         |
| 2009.3  | 4618.4                    | 4021.6  | 1360.0     | 12.7                  | 161.3                    | 113.7                        |
| 2009.4  | 4604.4                    | 3998.5  | 1397.2     | 19.6                  | 212.7                    | 165.6                        |
| 2010.1  | 4590.0                    | 4001.8  | 1408.2     | 19.0                  | 160.9                    | 123.1                        |
| 2010.2  | 4573.5                    | 3994.3  | 1432.2     | 26.4                  | 135.8                    | 148.8                        |
| 2010.3  | 4560.0                    | 3981.0  | 1459.0     | 20.8                  | 139.0                    | 100.5                        |
| 2010.4  | 4539.7                    | 3957.4  | 1503.0     | 26.8                  | 188.1                    | 112.5                        |
| 2011.1  | 4077.0                    | 3758.0  | 1510.3     | 15.1                  | 171.9                    | 103.2                        |
| 2011.2  | 4068.6                    | 3721.4  | 1555.3     | 12.4                  | 213.0                    | 90.0                         |
| 2011.3  | 4061.6                    | 3696.3  | 1587.3     | 13.0                  | 145.9                    | 81.4                         |
| 2011.4  | 4050.8                    | 3649.8  | 1644.7     | 15.8                  | 255.4                    | 91.3                         |
| 2012.1  | 4012.6                    | 3658.7  | 1673.9     | 13.4                  | 222.7                    | 111.1                        |
| 2012.2  | 4004.9                    | 3629.6  | 1710.7     | 11.3                  | 171.3                    | 91.9                         |
| 2012.3  | 4000.4                    | 3608.5  | 1736.3     | 7.9                   | 118.8                    | 70.7                         |
| 2012.4  | 3990.2                    | 3579.2  | 1775.8     | 11.8                  | 201.3                    | 103.9                        |
| 2013.1  | 3963.0                    | 3601.1  | 1781.2     | 16.5                  | 184.9                    | 141.7                        |
| 2013.2  | 3956.3                    | 3618.6  | 1770.3     | 15.2                  | 136.7                    | 247.6                        |
| 2013.3  | 3952.8                    | 3635.1  | 1757.3     | 9.3                   | 110.7                    | 248.6                        |
| 2013.4  | 3946.5                    | 3659.3  | 1739.5     | 14.7                  | 172.8                    | 334.5                        |

Note: 2008.\*. represents the quarter \* of the year 2008

Rates are per 10,000 inhabitants and age-standardized on the European Standard Population (direct method)

**Table S3: Age-adjusted rates by the direct method per 10,000 inhabitants based on the European Standard Population. NAVARRE N=73,644 (2008-2013).**

| Quarter | Smoking status prevalence |         |            | New smokers incidence | New ex-smokers incidence | Ex-smoker relapses incidence |
|---------|---------------------------|---------|------------|-----------------------|--------------------------|------------------------------|
|         | Non smokers               | Smokers | Ex-smokers |                       |                          |                              |
| 2008.1  | 5652.5                    | 4034.2  | 313.3      | 25.3                  | 175.3                    | 227.0                        |
| 2008.2  | 5642.5                    | 4013.0  | 344.5      | 17.2                  | 181.0                    | 160.4                        |
| 2008.3  | 5632.4                    | 4003.3  | 364.3      | 16.5                  | 109.1                    | 129.4                        |
| 2008.4  | 5620.0                    | 3993.3  | 386.7      | 21.4                  | 127.7                    | 230.3                        |
| 2009.1  | 5645.0                    | 3951.4  | 403.7      | 30.9                  | 136.4                    | 225.4                        |
| 2009.2  | 5630.8                    | 3944.1  | 425.1      | 23.5                  | 132.1                    | 174.0                        |
| 2009.3  | 5623.5                    | 3934.7  | 441.8      | 12.5                  | 100.3                    | 100.7                        |
| 2009.4  | 5614.7                    | 3925.5  | 459.8      | 14.8                  | 109.9                    | 134.7                        |
| 2010.1  | 5618.3                    | 3905.9  | 475.8      | 27.2                  | 111.2                    | 209.4                        |
| 2010.2  | 5605.5                    | 3893.8  | 500.7      | 21.1                  | 114.9                    | 132.5                        |
| 2010.3  | 5595.1                    | 3889.1  | 515.8      | 16.4                  | 82.2                     | 98.7                         |
| 2010.4  | 5581.9                    | 3885.3  | 532.8      | 21.4                  | 89.9                     | 81.2                         |
| 2011.1  | 4990.3                    | 3806.9  | 548.1      | 16.0                  | 136.8                    | 141.3                        |
| 2011.2  | 4979.2                    | 3795.8  | 570.2      | 20.3                  | 116.7                    | 113.8                        |
| 2011.3  | 4972.0                    | 3791.6  | 581.6      | 12.7                  | 48.6                     | 60.2                         |
| 2011.4  | 4964.3                    | 3780.5  | 600.4      | 13.8                  | 99.6                     | 118.6                        |
| 2012.1  | 4910.7                    | 3804.6  | 630.0      | 18.6                  | 127.3                    | 87.6                         |
| 2012.2  | 4902.9                    | 3781.3  | 661.1      | 13.7                  | 130.1                    | 108.4                        |
| 2012.3  | 4897.7                    | 3773.3  | 674.3      | 9.8                   | 75.2                     | 58.6                         |
| 2012.4  | 4888.9                    | 3760.5  | 695.8      | 15.2                  | 110.2                    | 96.0                         |
| 2013.1  | 4886.8                    | 3746.7  | 711.8      | 15.1                  | 121.0                    | 116.4                        |
| 2013.2  | 4876.8                    | 3733.2  | 735.2      | 16.9                  | 104.2                    | 97.4                         |
| 2013.3  | 4870.8                    | 3727.9  | 746.6      | 9.5                   | 60.7                     | 119.1                        |
| 2013.4  | 4861.3                    | 3719.8  | 764.1      | 16.9                  | 90.7                     | 97.8                         |

Note: 2008.\*. represents the quarter \* of the year 2008

Rates are per 10,000 inhabitants and age-standardized on the European Standard Population (direct method)

**Table S4: Age-adjusted rates by the direct method per 10,000 inhabitants based on the European Standard Population. THE BALEARIC ISLANDS N=178,251 (2010-2013).**

| Quarter | Smoking status prevalence |         |            | New smokers incidence | New ex-smokers incidence | Ex-smoker relapses incidence |
|---------|---------------------------|---------|------------|-----------------------|--------------------------|------------------------------|
|         | Non smokers               | Smokers | Ex-smokers |                       |                          |                              |
| 2010.2  | 5411.0                    | 4029.7  | 559.3      | 9.3                   | 158.5                    | 576.6                        |
| 2010.3  | 5406.4                    | 4007.3  | 586.2      | 9.0                   | 151.6                    | 527.0                        |
| 2010.4  | 5401.6                    | 3982.7  | 615.7      | 9.3                   | 158.7                    | 503.7                        |
| 2011.1  | 5374.9                    | 3987.9  | 637.1      | 6.6                   | 149.9                    | 545.7                        |
| 2011.2  | 5372.4                    | 3959.3  | 668.3      | 5.2                   | 170.9                    | 424.4                        |
| 2011.3  | 5369.7                    | 3929.5  | 700.8      | 5.2                   | 160.1                    | 383.9                        |
| 2011.4  | 5367.4                    | 3898.4  | 734.2      | 4.0                   | 169.8                    | 385.6                        |
| 2012.1  | 5345.3                    | 3888.3  | 766.4      | 4.3                   | 188.1                    | 351.8                        |
| 2012.2  | 5344.0                    | 3862.4  | 793.6      | 2.4                   | 137.0                    | 370.6                        |
| 2012.3  | 5342.5                    | 3841.0  | 816.6      | 2.9                   | 113.5                    | 372.6                        |
| 2012.4  | 5341.7                    | 3818.9  | 839.4      | 1.6                   | 133.0                    | 339.2                        |
| 2013.1  | 5324.1                    | 3825.3  | 850.7      | 2.1                   | 130.5                    | 480.5                        |
| 2013.2  | 5317.8                    | 3810.5  | 871.7      | 12.1                  | 106.7                    | 453.0                        |
| 2013.3  | 5308.3                    | 3800.6  | 891.1      | 17.5                  | 93.7                     | 103.9                        |
| 2013.4  | 5298.6                    | 3787.4  | 914.1      | 17.5                  | 116.8                    | 285.1                        |

Note: 2010.\*. represents the quarter \* of the year 2010

Rates are per 10,000 inhabitants and age-standardized on the European Standard Population (direct method)

**Table S5. Age-adjusted rates by the direct method for 10,000 inhabitants based on the European Standard Population in CATALONIA. N=72,340 (2008-2013).**

| Quarter | Smoking Status prevalence |        |         |        |            |        | New smokers incidence | New ex-smokers incidence | Ex-smoker relapse incidence |       |       |       |
|---------|---------------------------|--------|---------|--------|------------|--------|-----------------------|--------------------------|-----------------------------|-------|-------|-------|
|         | Non smokers               |        | Smokers |        | Ex-smokers |        |                       |                          |                             |       |       |       |
|         | Female                    | Male   | Female  | Male   | Female     | Male   |                       |                          |                             |       |       |       |
| 2008.1  | 5909.5                    | 3349.2 | 3411.5  | 4910.7 | 679.0      | 1740.1 | 16.6                  | 27.8                     | 246.7                       | 260.5 | 315.2 | 158.2 |
| 2008.2  | 5900.4                    | 3331.6 | 3385.4  | 4856.2 | 714.2      | 1812.2 | 14.3                  | 34.4                     | 266.5                       | 202.9 | 101.2 | 195.0 |
| 2008.3  | 5891.9                    | 3318.8 | 3368.4  | 4822.1 | 739.7      | 1859.1 | 14.0                  | 21.8                     | 275.0                       | 265.9 | 289.0 | 166.5 |
| 2008.4  | 5876.9                    | 3296.1 | 3356.2  | 4789.4 | 766.9      | 1914.5 | 24.0                  | 31.9                     | 254.1                       | 329.2 | 112.0 | 99.6  |
| 2009.1  | 5832.7                    | 3323.5 | 3379.8  | 4769.9 | 787.5      | 1906.6 | 27.8                  | 26.3                     | 289.2                       | 234.0 | 148.8 | 105.2 |
| 2009.2  | 5823.1                    | 3311.7 | 3366.5  | 4749.0 | 810.4      | 1939.3 | 13.7                  | 19.7                     | 182.0                       | 237.8 | 89.5  | 79.2  |
| 2009.3  | 5814.6                    | 3300.6 | 3356.2  | 4728.4 | 829.2      | 1971.1 | 11.9                  | 15.3                     | 154.4                       | 165.7 | 181.4 | 65.8  |
| 2009.4  | 5804.4                    | 3282.4 | 3335.4  | 4702.6 | 860.2      | 2015.0 | 14.3                  | 28.0                     | 243.3                       | 203.9 | 188.5 | 152.0 |
| 2010.1  | 5757.2                    | 3312.5 | 3359.5  | 4679.7 | 883.3      | 2007.8 | 14.0                  | 26.7                     | 201.5                       | 144.1 | 133.5 | 109.4 |
| 2010.2  | 5744.1                    | 3292.3 | 3355.5  | 4668.2 | 900.4      | 2039.6 | 24.1                  | 30.4                     | 146.6                       | 131.6 | 164.1 | 152.0 |
| 2010.3  | 5730.0                    | 3279.4 | 3345.8  | 4650.5 | 924.2      | 2070.2 | 20.7                  | 22.7                     | 156.1                       | 134.4 | 106.6 | 98.0  |
| 2010.4  | 5710.9                    | 3256.8 | 3332.3  | 4616.4 | 956.8      | 2126.8 | 30.9                  | 24.3                     | 205.4                       | 177.3 | 132.2 | 114.9 |
| 2011.1  | 5231.2                    | 2821.0 | 3138.8  | 4408.8 | 975.2      | 2115.4 | 15.0                  | 16.8                     | 181.1                       | 166.1 | 62.6  | 146.7 |
| 2011.2  | 5223.4                    | 2811.7 | 3115.8  | 4356.5 | 1006.0     | 2177.1 | 12.2                  | 14.3                     | 231.6                       | 203.8 | 118.9 | 65.4  |
| 2011.3  | 5216.7                    | 2804.3 | 3095.4  | 4326.8 | 1033.2     | 2214.1 | 12.4                  | 15.2                     | 166.4                       | 136.0 | 93.0  | 68.5  |
| 2011.4  | 5209.6                    | 2789.1 | 3057.6  | 4270.9 | 1078.0     | 2285.2 | 12.1                  | 21.2                     | 308.9                       | 241.6 | 111.0 | 78.8  |
| 2012.1  | 5142.2                    | 2792.0 | 3082.8  | 4259.8 | 1120.2     | 2293.5 | 9.3                   | 19.1                     | 251.1                       | 216.5 | 140.4 | 83.6  |
| 2012.2  | 5136.1                    | 2782.4 | 3059.1  | 4225.1 | 1150.0     | 2337.7 | 10.4                  | 12.4                     | 215.6                       | 162.3 | 107.4 | 75.8  |
| 2012.3  | 5132.0                    | 2777.7 | 3041.8  | 4200.0 | 1171.4     | 2367.6 | 8.7                   | 7.3                      | 135.6                       | 113.1 | 61.0  | 80.2  |
| 2012.4  | 5123.4                    | 2765.4 | 3020.5  | 4161.9 | 1201.3     | 2417.9 | 10.2                  | 16.2                     | 192.8                       | 203.5 | 128.5 | 89.1  |
| 2013.1  | 5063.9                    | 2781.5 | 3055.9  | 4167.2 | 1225.4     | 2396.5 | 15.4                  | 19.9                     | 213.2                       | 180.4 | 167.8 | 123.5 |
| 2013.2  | 5058.8                    | 2773.4 | 3057.2  | 4202.9 | 1229.3     | 2368.9 | 10.2                  | 21.9                     | 146.9                       | 131.3 | 216.4 | 251.9 |
| 2013.3  | 5055.0                    | 2770.2 | 3060.2  | 4234.1 | 1230.0     | 2340.9 | 9.0                   | 10.7                     | 127.0                       | 106.7 | 217.7 | 263.3 |
| 2013.4  | 5049.2                    | 2763.3 | 3063.6  | 4281.9 | 1232.5     | 2300.1 | 11.8                  | 21.1                     | 202.8                       | 159.2 | 325.6 | 315.6 |

Note: 2008.\*. represents the quarter \* of the year 2008

Rates are per 10,000 inhabitants and age-standardized on the European Standard Population (direct method)

**Table S6. Age-adjusted rates by the direct method per 10,000 inhabitants based on the European Standard Population in NAVARRE. N=37,898 (2008-2013).**

| Quarter | Smoking Status prevalence |        |         |        |            |       | New smokers incidence | New ex-smokers incidence | Ex-smoker relapse incidence |       |       |       |
|---------|---------------------------|--------|---------|--------|------------|-------|-----------------------|--------------------------|-----------------------------|-------|-------|-------|
|         | Non smokers               |        | Smokers |        | Ex-smokers |       |                       |                          |                             |       |       |       |
|         | Female                    | Male   | Female  | Male   | Female     | Male  |                       |                          |                             |       |       |       |
| 2008.1  | 6224.8                    | 5021.1 | 3542.5  | 4569.6 | 232.7      | 409.3 | 22.3                  | 31.0                     | 152.7                       | 172.3 | 164.4 | 295.8 |
| 2008.2  | 6215.3                    | 5010.6 | 3527.8  | 4539.7 | 256.9      | 449.7 | 15.2                  | 20.3                     | 168.7                       | 187.7 | 136.9 | 173.7 |
| 2008.3  | 6207.4                    | 4998.8 | 3518.5  | 4528.6 | 274.2      | 472.6 | 11.5                  | 22.1                     | 147.1                       | 97.1  | 147.9 | 123.7 |
| 2008.4  | 6198.6                    | 4982.4 | 3510.9  | 4515.4 | 290.4      | 502.2 | 14.8                  | 30.0                     | 157.9                       | 125.6 | 296.5 | 98.8  |
| 2009.1  | 6209.7                    | 5028.3 | 3485.7  | 4451.5 | 304.6      | 520.2 | 24.9                  | 39.7                     | 184.8                       | 111.3 | 254.0 | 197.0 |
| 2009.2  | 6197.8                    | 5011.6 | 3480.3  | 4441.1 | 321.9      | 547.3 | 17.4                  | 32.6                     | 177.2                       | 127.7 | 152.7 | 171.7 |
| 2009.3  | 6191.6                    | 5003.2 | 3475.5  | 4426.3 | 332.9      | 570.4 | 10.7                  | 15.2                     | 108.4                       | 98.3  | 73.4  | 111.5 |
| 2009.4  | 6186.2                    | 4990.0 | 3470.2  | 4413.1 | 343.6      | 596.9 | 8.4                   | 24.0                     | 97.2                        | 115.8 | 126.6 | 134.7 |
| 2010.1  | 6175.4                    | 5014.1 | 3464.6  | 4375.5 | 360.0      | 610.4 | 22.6                  | 33.5                     | 115.7                       | 112.9 | 224.3 | 208.6 |
| 2010.2  | 6164.6                    | 4999.4 | 3455.7  | 4359.8 | 379.7      | 640.8 | 16.4                  | 27.9                     | 119.1                       | 114.5 | 106.4 | 129.5 |
| 2010.3  | 6154.5                    | 4988.6 | 3456.0  | 4350.4 | 389.5      | 661.0 | 16.2                  | 17.0                     | 111.3                       | 75.9  | 88.3  | 94.5  |
| 2010.4  | 6142.1                    | 4974.6 | 3455.4  | 4343.4 | 402.5      | 682.1 | 17.8                  | 26.3                     | 126.9                       | 80.9  | 71.3  | 85.7  |
| 2011.1  | 5541.4                    | 4399.8 | 3388.4  | 4248.3 | 415.4      | 697.1 | 12.2                  | 21.0                     | 146.2                       | 135.4 | 91.3  | 183.2 |
| 2011.2  | 5532.4                    | 4386.6 | 3381.0  | 4233.7 | 431.9      | 724.9 | 15.5                  | 26.8                     | 151.1                       | 110.6 | 117.2 | 103.9 |
| 2011.3  | 5524.7                    | 4379.8 | 3377.8  | 4228.5 | 442.7      | 737.0 | 12.6                  | 13.7                     | 55.8                        | 44.9  | 61.6  | 54.1  |
| 2011.4  | 5518.9                    | 4370.0 | 3369.7  | 4213.6 | 456.6      | 761.7 | 9.6                   | 19.5                     | 118.2                       | 95.4  | 70.0  | 160.8 |
| 2012.1  | 5452.1                    | 4335.6 | 3408.9  | 4217.7 | 484.2      | 792.0 | 15.9                  | 22.5                     | 129.3                       | 126.5 | 106.9 | 65.3  |
| 2012.2  | 5445.6                    | 4326.1 | 3389.4  | 4190.1 | 510.2      | 829.0 | 11.7                  | 17.2                     | 125.1                       | 131.6 | 95.3  | 114.5 |
| 2012.3  | 5442.6                    | 4318.6 | 3385.2  | 4178.7 | 517.4      | 847.9 | 6.2                   | 14.2                     | 67.6                        | 78.0  | 68.6  | 41.2  |
| 2012.4  | 5434.5                    | 4308.9 | 3379.5  | 4159.1 | 531.2      | 877.2 | 12.5                  | 19.6                     | 130.7                       | 110.0 | 66.7  | 126.7 |
| 2013.1  | 5420.0                    | 4323.0 | 3380.9  | 4128.0 | 544.3      | 894.1 | 14.1                  | 16.4                     | 133.8                       | 124.7 | 68.6  | 157.5 |
| 2013.2  | 5413.7                    | 4309.1 | 3367.7  | 4114.5 | 563.9      | 921.6 | 10.1                  | 25.2                     | 103.2                       | 104.7 | 87.0  | 98.4  |
| 2013.3  | 5408.6                    | 4302.1 | 3363.6  | 4108.1 | 573.1      | 935.1 | 7.2                   | 12.7                     | 72.3                        | 57.3  | 152.7 | 85.9  |
| 2013.4  | 5399.9                    | 4291.6 | 3360.4  | 4094.8 | 584.9      | 958.8 | 13.9                  | 21.7                     | 65.6                        | 102.8 | 72.2  | 116.0 |

Note: 2008.\*. represents the quarter \* of the year 2008

Rates are per 10,000 inhabitants and age-standardized on the European Standard Population (direct method)

**Table S7. Age-adjusted rates by the direct method per 10,000 inhabitants based on the European Standard Population in THE BALEARIC ISLANDS. N= 94,164 (2010-2013).**

| Quarter | Smoking Status prevalence |        |         |        |            |        | New smokers incidence | New ex-smokers incidence | Ex-smoker incidence | relapse |       |       |
|---------|---------------------------|--------|---------|--------|------------|--------|-----------------------|--------------------------|---------------------|---------|-------|-------|
|         | Non smokers               |        | Smokers |        | Ex-smokers |        |                       |                          |                     |         |       |       |
|         | Female                    | Male   | Female  | Male   | Female     | Male   |                       |                          |                     |         |       |       |
| 2010.2  | 6224.8                    | 4484.3 | 3412.3  | 4723.7 | 362.9      | 792.0  | 8.9                   | 9.9                      | 106.8               | 169.6   | 631.1 | 560.7 |
| 2010.3  | 6220.5                    | 4479.3 | 3395.5  | 4695.0 | 384.0      | 825.7  | 8.2                   | 10.4                     | 149.6               | 147.6   | 576.9 | 435.9 |
| 2010.4  | 6215.8                    | 4474.3 | 3376.3  | 4664.4 | 408.0      | 861.2  | 8.8                   | 10.1                     | 179.2               | 150.7   | 484.7 | 571.5 |
| 2011.1  | 6171.2                    | 4472.1 | 3395.3  | 4651.7 | 433.5      | 876.2  | 6.7                   | 6.6                      | 141.1               | 146.7   | 562.7 | 508.9 |
| 2011.2  | 6168.5                    | 4469.8 | 3375.7  | 4612.8 | 455.9      | 917.5  | 5.2                   | 5.4                      | 140.3               | 173.8   | 446.1 | 426.0 |
| 2011.3  | 6165.8                    | 4467.0 | 3353.4  | 4574.6 | 480.8      | 958.4  | 4.9                   | 6.0                      | 162.5               | 154.9   | 400.9 | 391.6 |
| 2011.4  | 6163.1                    | 4465.3 | 3330.1  | 4534.6 | 506.8      | 1000.1 | 4.6                   | 3.4                      | 149.3               | 170.9   | 296.7 | 540.3 |
| 2012.1  | 6118.6                    | 4474.0 | 3337.9  | 4501.2 | 543.6      | 1024.8 | 3.7                   | 5.1                      | 179.2               | 182.1   | 306.5 | 461.7 |
| 2012.2  | 6117.0                    | 4473.2 | 3318.1  | 4468.3 | 564.9      | 1058.5 | 2.8                   | 1.9                      | 109.0               | 139.6   | 359.8 | 348.6 |
| 2012.3  | 6115.2                    | 4471.9 | 3302.0  | 4440.5 | 582.8      | 1087.7 | 3.1                   | 2.5                      | 103.4               | 112.8   | 376.5 | 363.9 |
| 2012.4  | 6114.3                    | 4471.2 | 3285.7  | 4411.7 | 600.0      | 1117.0 | 1.7                   | 1.6                      | 122.7               | 132.9   | 414.0 | 213.4 |
| 2013.1  | 6077.2                    | 4479.2 | 3302.2  | 4406.4 | 620.6      | 1114.4 | 0.9                   | 4.1                      | 137.9               | 122.6   | 492.0 | 470.3 |
| 2013.2  | 6070.8                    | 4473.1 | 3291.1  | 4387.8 | 638.2      | 1139.1 | 11.9                  | 12.7                     | 91.0                | 105.4   | 410.8 | 532.6 |
| 2013.3  | 6056.9                    | 4468.7 | 3287.9  | 4370.1 | 655.1      | 1161.2 | 23.4                  | 10.4                     | 94.4                | 90.1    | 110.4 | 87.5  |
| 2013.4  | 6046.1                    | 4460.3 | 3280.8  | 4349.5 | 673.1      | 1190.2 | 18.2                  | 16.9                     | 100.0               | 121.4   | 342.4 | 116.1 |

Note: 2010.\*. represents the quarter \* of the year 2010

Rates are per 10,000 inhabitants and age-standardized on the European Standard Population (direct method)
