# Supplementary material for: Effect of the comprehensive smoke-free law on time trends in smoking behaviour in primary healthcare patients in Spain: a longitudinal observational study
Source: PubMed Central journal article supplement — BMJ Open. 2019 Mar 3;9(3):e020120. doi: 10.1136/bmjopen-2017-020120 (PMC6443085; doi:10.1136/bmjopen-2017-020120), 2019-03-03
Supplement: bmjopen-2017-020120supp002.pdf [file bmjopen-2017-020120supp002.pdf]

**SUPPLEMENTARY DATA FOR Effect of the comprehensive smoke-free law on time trends in smoking behaviour in Primary Health Care patients in Spain: a longitudinal observational study**

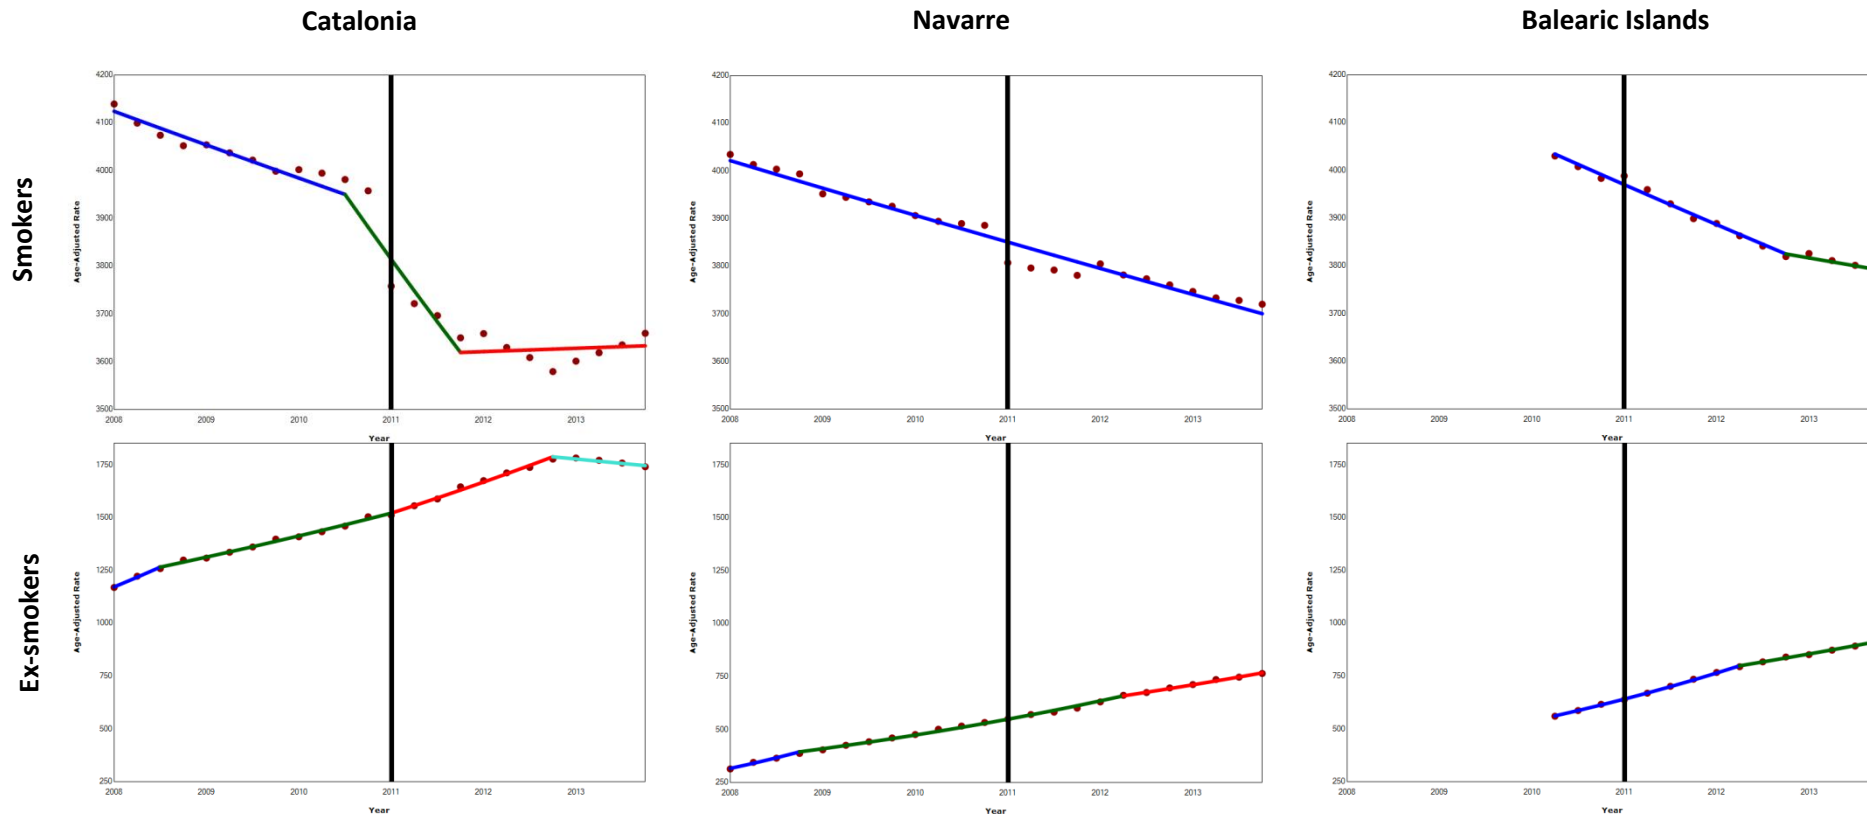

**Figure S1: Overall trends of age-standardized prevalence rates of smoking status in Catalonia, Navarre and the Balearic Islands.**

Solid lines represent the Joinpoint regression lines (each colour is a different trend); circle red points represent the age-adjusted prevalence rates. Black vertical lines represent the year when the Spanish comprehensive smoke-free law was introduced (2011).

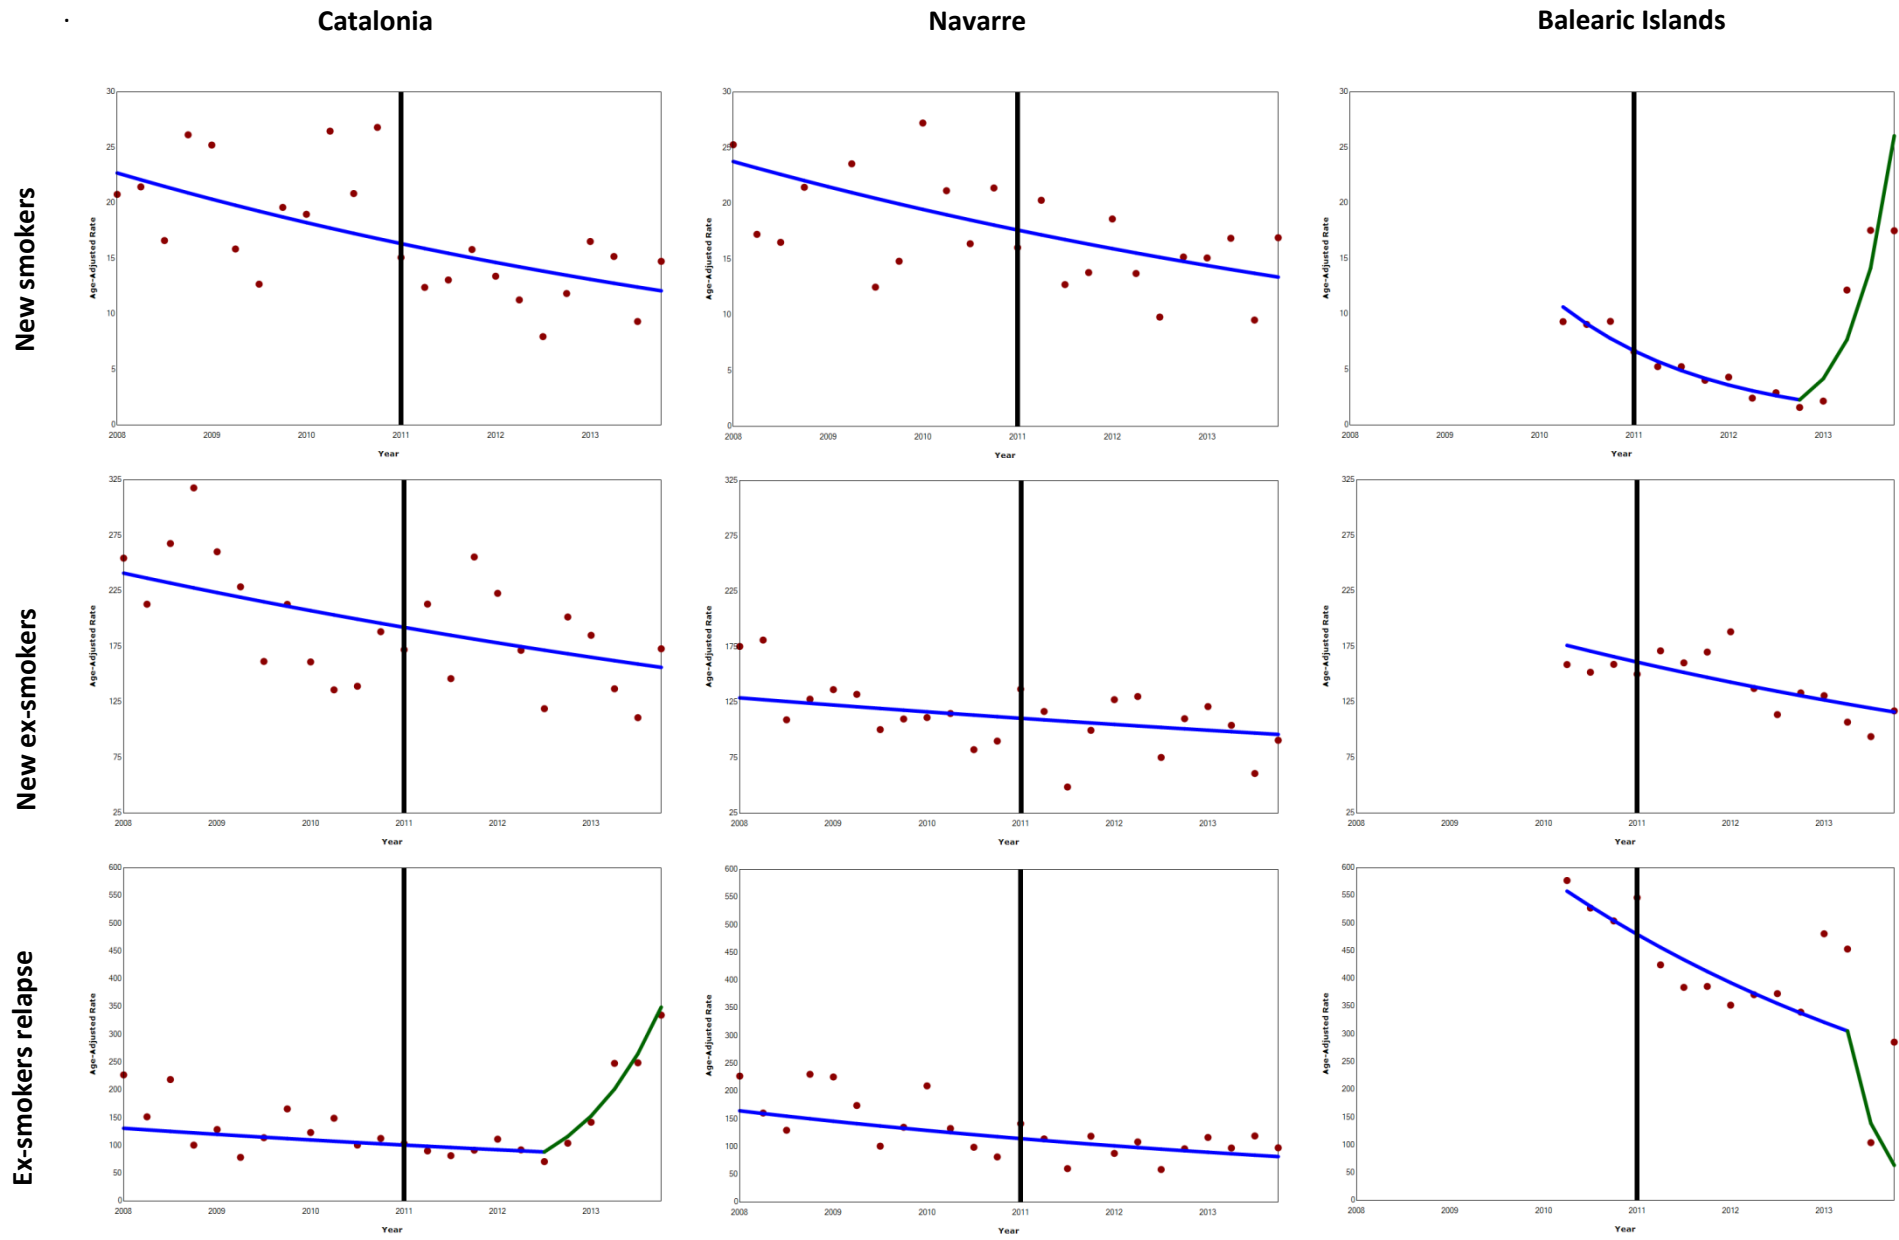

**Figure S2: Overall trends of age-standardized incidence rates of new smokers, ex-smokers and ex-smoker relapse in Catalonia, Navarre and the Balearic Islands.** Solid lines represent the Joinpoint regression lines (each colour is a different trend); circle red points represent the age-adjusted incidence rates. Black vertical lines represent the year when the Spanish comprehensive smoke-free law was introduced (2011).
